# Supplementary material
Source: publisher figshare collection journal article supplement (https://gsajournals.figshare.com/articles/dataset/_/15053076)
Supplement: Supplementary file 1 [file 1]

# Figure S3

Distribution of 336 *GCN5*-regulated genes from Shivarathri et al. in the *tra1Q3* dataset

a

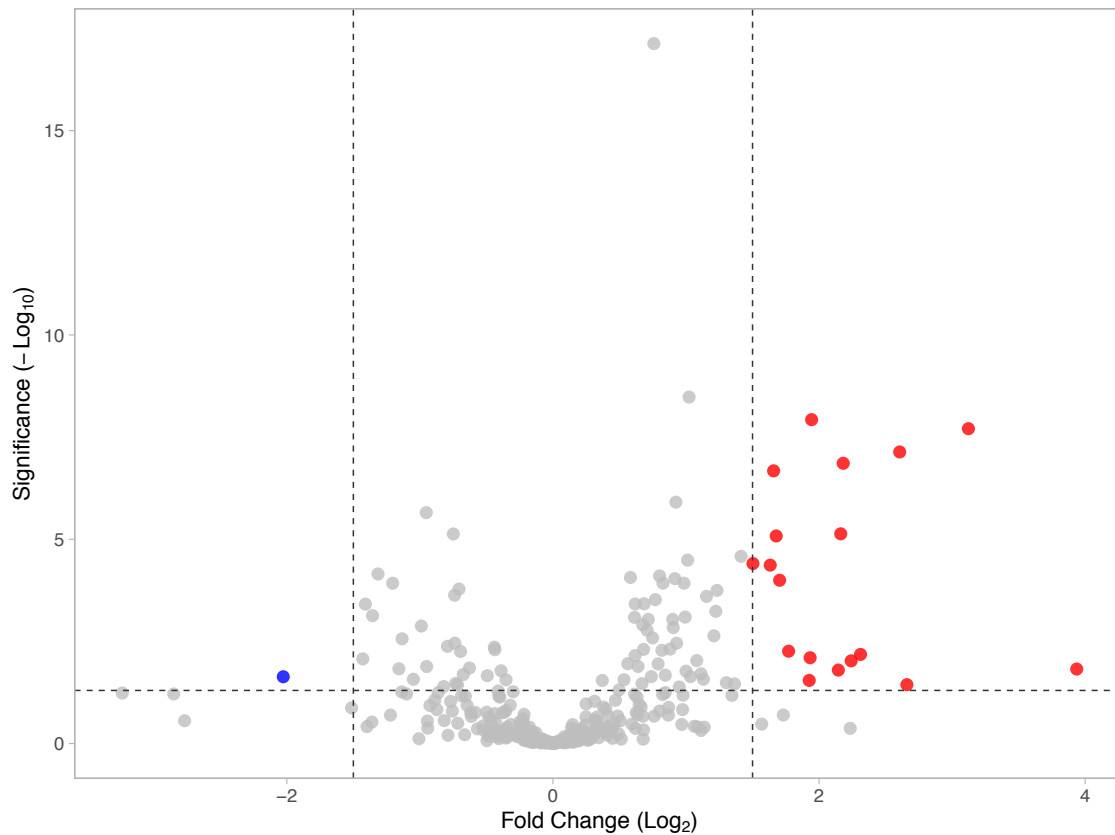

b

| Gene ID     | Log <sub>2</sub> (Fold-Change) <i>gcn5</i> Δ/Δ | Log <sub>2</sub> (Fold-Change) <i>tra1Q3</i> |
|-------------|------------------------------------------------|----------------------------------------------|
| CR_05270W_A | 1.74                                           | -2.03                                        |
| C3_06660C   | 2.43                                           | 1.50                                         |
| RBR1        | 1.73                                           | 1.63                                         |
| HAK1        | 2.2                                            | 1.66                                         |
| FTR1        | 3.01                                           | 1.68                                         |
| C2_04910W_A | 2.03                                           | 1.70                                         |
| FET99       | 3.35                                           | 1.77                                         |
| CFL5        | 2.51                                           | 1.93                                         |
| CR_04990C_A | 1.91                                           | 1.93                                         |
| PGA13       | 3.88                                           | 1.94                                         |
| RBT5        | 2.48                                           | 2.14                                         |
| CFL2        | 3.35                                           | 2.16                                         |
| CRP1        | -2.64                                          | 2.18                                         |
| ATX1        | -3.64                                          | 2.24                                         |
| C7_04070C_A | 2.29                                           | 2.31                                         |
| CFL4        | 6.99                                           | 2.61                                         |
| CFL11       | 2.63                                           | 2.66                                         |
| CR_05190W_A | 1.97                                           | 3.12                                         |
| C7_04080C_A | 1.58                                           | 3.94                                         |
