# Supplementary material
Source: publisher figshare collection journal article supplement (https://gsajournals.figshare.com/articles/dataset/_/15053076)
Supplement: Supplementary file 1 [file 1]

## Sheet: NDvsCASP_TRA1
Comparison: No treatment vs. Caspofungin in wild type strain
ORF	ASSEMBLY22_ID	Ca_GeneName	Sc_Ortholog	Sc_BestHit	Log2(Fold-Change)	Adjusted.Pvalue	Description
orf19.2512	C3_01100W_A		NA	NA	-3.11247	3.68807e-148	Protein of unknown function
orf19.4255	C5_02460C_A	ECM331	NA	NA	4.16893	1.95315e-121	GPI-anchored protein; mainly at plasma membrane, also at cell wall; Hap43, caspofungin-induced; Plc1-regulated; Hog1, Rim101-repressed; colony morphology-related regulated by Ssn6; induced by ketoconazole and hypoxia
orf19.1765	C2_10160W_A		NA	NA	2.73444	5.95435e-98	Secreted protein; fluconazole-induced
orf19.5267	C1_11990W_A		NA	NA	-3.44414	2.72771e-94	Putative cell wall adhesin-like protein; repressed in core caspofungin response and by alpha pheromone in SpiderM medium; transcript reduced in ace2 mutant; flow model, rat catheter and Spider biofilm repressed
orf19.1473	C2_01630W_A		NA	NA	4.06965	7.16168e-93	2-hydroxyacid dehydrogenase domain-containing protein; Hap43-repressed gene; induced by alpha pheromone in SpiderM medium
orf19.2758	C4_02440C_A	PGA38	NA	NA	-3.37507	6.36839e-73	Putative adhesin-like GPI-anchored protein; repressed during cell wall regeneration; possibly an essential gene, disruptants not obtained by UAU1 method; rat catheter and Spider biofilm repressed
orf19.6536	C7_01840W_A	IQG1	IQG1	NA	-2.05771	6.61235e-71	Actomyosin ring component at bud neck; cell-cycle regulated ser phosphorylation at CDK sites regulate association with Bni1/Bnr1, Iqg1 degradation, and ring disassembly; mutation causes cytokinetic defects; rat catheter biofilm repressed
orf19.24	C2_06470W_A	RTA2	RSB1	NA	2.71877	3.05665e-68	Flippase; sphingolipid long chain base release; mediates calcineurin-dependent resistance to azoles; stress-associate; Plc1, Ca2+, calcineurin-regulated; ketoconazole, caspofungin induced; Spider biofilm induced; flow biofilm repressed
orf19.2125	C6_04420W_A		NA	NA	4.08056	9.79575e-68	Protein of unknown function; GlcNAc-induced protein; Spider biofilm induced; rat catheter biofilm repressed
orf19.4691	C4_00980C_A	MRV1	NA	NA	4.63878	1.55097e-67	Protein of unknown function
orf19.7586	CR_10110W_A	CHT3	CTS1	NA	-3.72819	4.69243e-56	Major chitinase; secreted; functional homolog of S. cerevisiae Cts1p; 4 N-glycosylation motifs; possible O-mannosylation; putative signal peptide; hyphal-repressed; farnesol upregulated in biofilm; regulated by Efg1p, Cyr1p, Ras1p
orf19.557	CR_05210W_A		NA	NA	-2.45894	9.5089e-54	Protein of unknown function; Hap43-repressed; Spider biofilm repressed
orf19.2849	CR_02920C_A	AQY1	NA	NA	-2.58854	1.11536e-53	Aquaporin water channel; osmotic shock resistance, WT freeze tolerance; virulent in mice; flucytosine repressed; flow model/RPMI/Spider/rat catheter biofilm induced; required for RPMI biofilm formation; Bcr1-induced in a/a RPMI biofilms
orf19.2832	CR_02740W_A	INN1	INN1	NA	2.08418	2.15604e-48	Protein with similarity to S. cerevisiae Inn1p, which is an essential protein of the contractile actomyosin ring required for ingression of the plasma membrane into the bud neck during cytokinesis; contains a C2 membrane targeting domain
orf19.3629	C2_08490W_A	DSE1	DSE1	NA	-2.84525	2.44602e-48	Essential cell wall protein involved in cell wall integrity and rigidity; periodic mRNA expression peaks at M/G1 phase; Ace2p-induced; required for virulence in a mouse model of infection
orf19.3282	CR_00740C_A	BMT3	NA	NA	2.26829	1.02559e-47	Beta-mannosyltransferase; adds 2nd beta-mannose to the acid-stable fraction of cell wall phosphopeptidomannan, elongation of beta-mannose chains on the phosphopeptidomannan acid-labile fraction; Hap43-induced; Spider biofilm induced
orf19.675.1	C1_11260C_A		NA	NA	2.68678	2.82195e-47	Putative adhesin-like protein
orf19.4763	C1_09060C_A		FUN14	NA	-1.75578	2.04405e-46	Protein of unknown function; possibly membrane bound; mutants are viable; rat catheter biofilm repressed
orf19.7104	C7_00190W_A		NA	NA	-3.20318	2.05746e-46	Adhesin-like cell wall protein; similar to mucins and to a Litomosoides microfilarial sheath protein; N-terminal secretion signal; rat catheter and Spider biofilm repressed
orf19.4651	C4_01360W_A	PGA53	NA	NA	-1.85839	2.02273e-45	GPI-anchored cell surface protein of unknown function; greater mRNA abundance observed in a cyr1 homozygous null mutant than in wild type
orf19.2445	C1_06000W_A		NA	DIP5	2.84235	2.78884e-45	Putative dicarboxylic amino acid permease; fungal-specific (no human or murine homolog); induced by alpha pheromone in SpiderM medium
orf19.4910	C1_10400C_A	FGR41	NA	NA	-4.0826	3.11397e-44	Putative GPI-anchored adhesin-like protein; transposon mutation affects filamentous growth; Spider biofilm repressed
orf19.3893	C5_04110W_A	SCW11	SCW11	NA	-3.23603	3.28015e-44	Cell wall protein; repressed in ace2 mutant; repressed in core caspofungin response; induced in high iron; possibly an essential gene, disruptants not obtained by UAU1 method; rat catheter and Spider biofilm repressed
orf19.5019	C1_13810W_A		NA	NA	-2.69594	3.74413e-44	Protein of unknown function
orf19.6741	C3_07470W_A		PUN1	NA	-2.74792	4.98767e-44	Putative plasma membrane protein; predicted role in cell wall integrity; regulated by Nrg1, Tup1; induced during chlamydospore formation in both C. albicans and C. dubliniensis
orf19.1507	C2_01950C_A	AMN1	AMN1	NA	-1.86878	6.24544e-42	Putative negative regulator of exit from mitosis; Plc1-regulated; rat catheter biofilm induced
orf19.7585	CR_10100C_A	INO1	INO1	NA	3.56437	6.76215e-42	Inositol-1-phosphate synthase; antigenic in human; repressed by farnesol in biofilm or by caspofungin; upstream inositol/choline regulatory element; glycosylation predicted; rat catheter, flow model induced; Spider biofilm repressed
orf19.4705	C4_00880W_A		CCA1	NA	1.69683	1.37843e-41	Protein of unknown function
orf19.4279	C5_02630C_A	MNN1	NA	NA	2.3311	1.59782e-40	Putative alpha-1,3-mannosyltransferase; of the mannosyltransferase complex; negatively regulated by Rim101; transcript elevated in chk1 and nik1 mutants, but not in sln1 mutant; Spider and flow model biofilm induced
orf19.5814.1	C2_02910W_A		NA	NA	3.71009	1.88395e-40	Protein of unknown function
orf19.3793	C4_04860W_A		NA	NA	-1.55659	2.55741e-40	Protein of unknown function; mRNA binds She3; regulated by Nrg1; upregulated in a cyr1 or ras1 mutant
orf19.6249	C1_06610C_A	HAK1	NA	NA	3.72226	1.28635e-39	Putative potassium transporter; similar to Schwanniomyces occidentalis Hak1p; amphotericin B induced; induced upon phagocytosis by macrophage; Hap43-repressed; rat catheter biofilm repressed
orf19.6119	CR_07460C_A		NA	NA	-1.57625	7.29914e-39	Protein of unknown function; Spider biofilm repressed
orf19.6920	C7_01390W_A		NA	NA	2.98356	4.0253e-38	Protein of unknown function; induced during chlamydospore formation in both C. albicans and C. dubliniensis; Hap43-induced gene; Spider biofilm induced; F-12/CO2 early biofilm induced
orf19.6919	C7_01380W_A		NA	NA	4.73032	1.35484e-36	Protein of unknown function
orf19.1430	C4_04190C_A		NA	NA	2.77299	1.3987e-36	Protein of unknown function
orf19.4864	C1_09980C_A		YJU3	NA	1.16856	1.9026e-35	Protein of unknown function
orf19.6595	CR_09680C_A	RTA4	NA	NA	3.77808	1.61345e-34	Protein similar to S. cerevisiae Rsb1p, involved in fatty acid transport; transposon mutation affects filamentous growth; alkaline downregulated; caspofungin induced; possibly an essential gene; Hap43p-repressed
orf19.7495	CR_00380W_A		NA	NA	2.0219	2.26903e-34	Protein with NADPH oxidoreductase containing flavin mononucleotide (FMN) domain; induced by nitric oxide
orf19.9	CR_07120C_A		NA	NA	-2.12292	3.63978e-34	Protein of unknown function
orf19.7359	C3_05780C_A	CRZ1	CRZ1	NA	1.84056	1.61247e-32	Calcineurin-regulated C2H2 transcription factor; role in maintenance of membrane integrity, azole tolerance; not required for mouse virulence; repressed by low iron; regulates Ca++ influx during alkaline pH response; Spider biofilm induced
orf19.5037	C4_03820C_A	HRQ2	NA	NA	3.54003	2.48272e-32	Protein of unknown function; mutants are viable; rat catheter and Spider biofilm induced
orf19.6008	C3_05290C_A		YLL032C	NA	-1.94081	4.74757e-32	S. cerevisiae ortholog YLL032C interacts with ribosomes; repressed by alpha pheromone in SpiderM medium
orf19.5921	C3_04630W_A		NA	NA	1.46141	9.70588e-32	Protein of unknown function
orf19.6594	CR_09690C_A	PLB3	PLB1	NA	1.20322	2.00515e-31	GPI-anchored cell surface phospholipase B; possibly secreted; fungal-specific (no mammalian homolog); induced by Tbf1; fluconazole-induced; possible essential gene (UAU1 method); Spider and flow model biofilm induced
orf19.4294	C5_02740W_A		CYC2	NA	1.64854	4.4778e-31	Protein of unknown function
orf19.6688	C7_03560W_A		NA	NA	-2.86157	1.25374e-30	Protein of unknown function; expression decreases by benomyl treatment or in an azole-resistant strain overexpressing MDR1; Spider biofilm induced
orf19.5343	C2_10660W_A	ASH1	ASH1	NA	-2.57826	2.023e-30	GATA-like transcription factor; localizes to daughter cell, hyphal tip cell nuclei; mRNA localization mediated by She3; required for WT virulence and filamentous growth on solid media; Ras1 repressed in yeast, Cyr1 repressed yeast, hyphae
orf19.4706	C4_00860C_A		PIN2	NA	3.3329	2.83852e-30	Protein of unknown function; induced in cyr1 or ras1 mutant; induced by fluconazole, by alpha pheromone in SpiderM medium and during oralpharyngeal candidasis; Spider biofilm induced
orf19.5674	C4_00450C_A	PGA10	NA	NA	-3.32551	1.50165e-29	GPI anchored membrane protein; utilization of hemin and hemoglobin for Fe in host; Rim101 at ph8/hypoxia/ketoconazole/ciclopirox/hypha-induced; required for RPMI biofilm formation, Bcr1-induced in a/a biofilm; rat catheter biofilm repressed
orf19.5602	C6_03160C_A	BMT6	NA	NA	1.36169	2.81916e-29	Beta-mannosyltransferase; beta-1,2-mannosylation of phospholipomannan; member of a 9-member family including Bmt1, Bmt2, Bmt3, and Bmt4 with roles in mannosylation of cell wall phosphopeptidomannan; flow model biofilm induced
orf19.4496	C2_04540C_A	GDT1	GDT1	NA	1.44455	4.70371e-29	Protein of unknown function
orf19.3298	C1_01100W_A	CCH1	CCH1	NA	1.57677	6.04379e-29	Voltage-gated Ca2+ channel of the high affinity calcium uptake system; roles in thigmotropism, establishment of galvanotropism; transcript regulated by Nrg1 and Mig1; flow model biofilm repressed
orf19.5874	C3_04310C_A		NA	NA	3.5999	6.04379e-29	Protein of unknown function
orf19.3066	C1_03680W_A	ENG1	DSE4	NA	-2.18424	7.11034e-29	Endo-1,3-beta-glucanase; ortholog of S. cerevisiae Dse4 needed for cell separation; caspofungin, fluconazole repressed; repressed by alpha pheromone in SpiderM medium; flow model biofilm induced; rat catheter biofilm repressed
orf19.5565	C6_02890C_A	HPD1	NA	NA	3.89215	3.01133e-28	3-hydroxypropionate dehydrogenase; involved in degradation of toxic propionyl-CoA; rat catheter and Spider biofilm induced
orf19.5614	C6_03260W_A		RNH1	NA	2.13063	3.01133e-28	Putative ribonuclease H1; possibly an essential gene, disruptants not obtained by UAU1 method; flow model biofilm induced; Spider biofilm induced
orf19.2060	C2_00680C_A	SOD5	NA	NA	4.71317	3.32183e-28	Cu and Zn-containing superoxide dismutase; protects against oxidative stress; induced by neutrophils, hyphal growth, caspofungin, osmotic/oxidative stress; oralpharyngeal candidiasis induced; rat catheter and Spider biofilm induced
orf19.5877	C3_04340W_A	ATF1	NA	NA	1.45776	3.59545e-28	Putative alcohol acetyltransferase; caspofungin repressed; expression depends on Tac1p
orf19.7218	C1_14120C_A	RBE1	PRY2	NA	-2.42551	7.69512e-28	Pry family cell wall protein; Rim101, Efg1, Ssn6, alkaline repressed; O-glycosylation; no GPI anchor predicted; ketoconazol induced; regulated by Sef1, Sfu1, Hap4; flow model biofilm induced; rat catheter and Spider biofilm repressed
orf19.5664	C4_00370W_A	HOF1	HOF1	NA	-1.64257	2.44779e-27	Ortholog of S. cerevisiae Hof1; a protein localized to the bud neck and required for cytokinesis in S. cerevisiae; periodic mRNA expression, peak at cell-cycle G2/M phase; mutant is viable
orf19.909	C2_03220C_A	STP4	STP3	NA	0.919513	2.44779e-27	C2H2 transcription factor; induced in core caspofungin response; colony morphology-related gene regulation by Ssn6; induced by 17-beta-estradiol, ethynyl estradiol; rat catheter and Spider biofilm induced
orf19.946	C5_00430W_A	MET14	MET14	NA	1.84091	4.5857e-27	Putative adenylylsulfate kinase; predicted role in sulfur metabolism; possibly adherence-induced; protein present in exponential and stationary growth phase yeast; F-12/CO2 biofilm induced
orf19.3592	C2_08790W_A	JEM1	JEM1	NA	1.35279	5.58682e-27	Functional homolog of S. cerevisiae Jem1p, which acts with Scj1p and Kar2p (BiP) in protein folding and ER-associated degradation of misfolded proteins, and also has a role in karyogamy; has J domain and 4 tetratricopeptide repeats
orf19.6420	CR_08510W_A	PGA13	NA	NA	3.30229	6.2569e-27	GPI-anchored cell wall protein involved in cell wall synthesis; required for normal cell surface properties; induced in oralpharyngeal candidasis; Spider biofilm induced; Bcr1-repressed in RPMI a/a biofilms
orf19.2649	C5_03310C_A	PCL1	NA	NA	2.17387	6.34546e-27	Cyclin homolog; transcript induced by filamentous growth; induced by alpha pheromone in SpiderM medium
orf19.263.1	C3_02710W_A		NA	NA	1.56553	7.80623e-27	Protein of unknown function; gene has intron; Spider biofilm induced
orf19.6928	C3_03870C_A	SAP9	YPS1	NA	2.03316	2.22473e-26	Secreted aspartyl protease; roles in adhesion, cell surface integrity; induced by antifungal drugs, stationary phase, or in white-phase cells; farnesol-downregulated in biofilm; autocatalytic processing; GPI-anchor; Spider biofilm induced
orf19.1945	C5_01240W_A	AUR1	AUR1	NA	1.6232	4.94398e-26	Inositolphosphorylceramide (IPC) synthase; catalyzes the key step in sphingolipid biosynthesis; antifungal drug target; flow model biofilm induced; Spider biofilm induced
orf19.2179	C2_08050C_A	SIT1	ARN1	NA	-2.09517	8.30036e-26	Transporter of ferrichrome siderophores, not ferrioxamine B; required for human epithelial cell invasion in vitro, not for mouse systemic infection; regulated by iron, Sfu1, Rfg1, Tup1, Hap43; rat catheter and Spider biofilm induced
orf19.3919	C5_04320C_A		NA	NA	0.911389	1.49249e-25	RNI-like superfamily domain-containing protein; early-stage flow model biofilm induced; Spider biofilm induced
snR35a	CR_00450C_A		NA	NA	2.29756	1.5924e-25	H/ACA box small nucleolar RNA (snoRNA)
orf19.6556	C7_01680C_A		NA	NA	-1.69354	4.26906e-25	Protein of unknown function; rat catheter, flow model and Spider biofilm induced
orf19.5843	CR_05610C_A	SRR1	NA	NA	1.36168	5.03879e-25	Two-component system response regulator; involved in stress response; Plc1-regulated; upregulated in cyr1 null mutant; flow model biofilm induced; Spider biofilm induced
orf19.1223	C2_06670C_A	DBF2	DBF2	NA	-1.39024	8.53025e-25	Essential serine/threonine protein kinase involved in mitotic spindle formation and cytokinesis; required for septum formation, exit from mitosis, and normal hyphal morphogenesis; virulence-group-correlated expression
orf19.1522	C2_02050C_A		NA	NA	-1.76477	2.07445e-24	Protein of unknown function
orf19.3902	C5_04190W_A	MRV2	YDL218W	NA	2.49155	2.16818e-24	Protein of unknown function; repressed by fluphenazine treatment or in an azole-resistant strain that overexpresses CDR1 and CDR2; Spider biofilm induced
orf19.7444	C3_06550C_A		TFB6	NA	-0.92037	2.20925e-24	Protein of unknown function
orf19.3865	CR_06110C_A	RFX1	RFX1	NA	1.74656	2.52599e-24	Transcription factor; involved in DNA damage responses, morphogenesis, and virulence; Spider biofilm induced
orf19.2352	C1_10690W_A		IMO32	NA	1.51741	3.21549e-24	Protein of unknown function
orf19.3591	C2_08800C_A	APE3	APE3	NA	-1.01053	3.31575e-24	Putative vacuolar aminopeptidase Y,; regulated by Gcn2 and Gcn4; rat catheter and Spider biofilm repressed
orf19.4432	C1_07380C_A	KSP1	KSP1	NA	-1.0251	3.76839e-24	Putative serine/threonine protein kinase; mRNA binds She3 and is localized to hyphal tips; mutation confers hypersensitivity to amphotericin B
orf19.727	CR_06380C_A		NA	NA	1.47145	4.78406e-24	Predicted ORF overlapping the Major Repeat Sequence on chromosome R; member of a family encoded by FGR6-related genes in the RB2 repeat sequence
orf19.2444	C1_06010W_A	CHS7	CHS7	NA	1.23651	1.16021e-23	Protein required for wild-type chitin synthase III activity; similar to (but not functional homolog of) S. cerevisiae Chs7p, which effects ER export of Chs3p; induced cyr1 mutant hyphae and ras1 yeast-form cells; Spider biofilm induced
orf19.6408	CR_08420W_A		NA	NA	-1.58538	1.16021e-23	Putative DnaJ-like heat shock/chaperone; Hap43-repressed; Spider and F-12/CO2 biofilm induced
orf19.5353	C2_10730W_A		NA	NA	2.8512	1.23748e-23	Protein of unknown function
orf19.6163	C3_00860W_A	CSE4	CSE4	NA	-1.18347	1.47561e-23	Centromeric histone H3 variant; role in structural changes of centromeric nucleosomes during cell cycle; 4 nucleosomes bind 1 centromere, each has 1 Cse4 molecule during most of cell cycle, 2 molecules in anaphase; Spider biofilm repressed
orf19.4239	C5_02310C_A		NA	NA	1.71282	3.50458e-23	Planktonic growth-induced gene
orf19.6896	C7_01100C_A		NA	NA	2.10398	1.92261e-22	Predicted ORF overlapping the Major Repeat Sequence on chromosome 7; member of a family encoded by FGR6-related genes in the RB2 repeat sequence
orf19.4764	C1_09070W_A		PAN2	NA	-0.963492	1.95256e-22	Protein of unknown function
orf19.1943	C5_01260W_A		NA	NA	2.2378	3.77238e-22	Protein of unknown function
orf19.5716	C6_03500C_A	SAP4	NA	NA	3.75039	4.77978e-22	Secreted aspartyl proteinase; sap4,5,6 mutant defective in protein utilization for nitrogen; virulence role complicated by URA3 effects; expressed during mucosal and systemic infections; N-glycosylated; rat catheter, Spider biofilm induced
orf19.5751	C6_03770C_A	ORM1	ORM1	NA	-1.41925	4.93299e-22	Putative endoplasmic reticulum membrane protein; Hap43p-repressed gene; mutation confers hypersensitivity to aureobasidin A
orf19.2028	C2_00960C_A	MXR1	MXR1	NA	1.52249	5.81001e-22	Putative methionine sulfoxide reductase; Plc1-regulated; induced by human neutrophils, flucytosine; macrophage regulated (gene induced, protein decreased); possibly adherence-induced; Spider biofilm induced
orf19.3936	C5_04510W_A	GDE1	GDE1	NA	1.62958	1.08395e-21	Glycerophosphocholine phosphodiesterase; mutation confers hypersensitivity to 5-fluorouracil (5-FU); F-12/CO2 early biofilm induced
orf19.4365	CR_03660C_A		NA	NA	2.37835	1.08395e-21	Protein of unknown function
orf19.2020	C2_01020W_A	HGT6	HXT6	NA	-2.04006	2.02734e-21	Putative high-affinity MFS glucose transporter; 20 family members; induced in core stress response; fluconazole, oralpharyngeal candidasis induced; flow model biofilm induced; Spider biofilm induced
orf19.1800	C4_05440C_A		TDA6	NA	-1.48967	2.16937e-21	Protein of unknown function; Spider biofilm induced
orf19.4082	C2_09220W_A	DDR48	DDR48	NA	3.31586	2.16937e-21	Immunogenic stress-associated protein; filamentation regulated; induced by benomyl/caspofungin/ketoconazole or in azole-resistant strain; Hog1, farnesol, alkaline repressed; stationary phase enriched; Spider, flow model biofilm induced
orf19.6916	C7_01350C_A		ATP11	NA	1.57409	2.29106e-21	Protein of unknown function
orf19.3370	C4_03440C_A	DOT4	UBP10	NA	1.87864	3.85882e-21	Protein similar to ubiquitin C-terminal hydrolase; localizes to cell surface of hyphal cells, but not yeast-form cells; repressed upon high-level peroxide; Hap43p-induced; rat catheter biofilm induced
orf19.2286	C2_07290W_A		LIA1	NA	-1.39703	6.82103e-21	Putative deoxyhypusine hydroxylase; ketoconazole-induced; protein level decreases in stationary phase cultures; required for biofilm formation; Spider biofilm repressed
orf19.1515	C2_02010C_A	CHT4	CTS2	NA	1.31628	1.00919e-20	Chitinase; similar to S. cerevisiae sporulation-specific Cts2p; functionally complements A. gossypii cts2 mutant sporulation defect; homozygous null mutation causes no obvious defects; transcription decreases upon yeast-to-hyphal switch
orf19.1893	C2_07390C_A		NA	NA	-2.25349	1.00919e-20	Protein of unknown function; Spider biofilm repressed
orf19.5543	C6_02720C_A		NA	NA	1.31138	1.46809e-20	Protein of unknown function
orf19.1386	C2_09680W_A		BET1	NA	-0.699606	2.31244e-20	Protein of unknown function
orf19.4689	C4_01000C_A	PGA57	NA	NA	1.41242	2.39409e-20	Putative GPI-anchored protein; Hap43p-induced gene
orf19.6068	C1_00400W_A	SVF1	SVF1	NA	-1.79028	2.71237e-20	Putative survival factor; stationary phase enriched protein; fluconazole-induced; regulated by Gcn4p; repressed in response to amino acid starvation (3-AT treatment); fungal-specific (no human or murine homolog)
orf19.663	C1_11400C_A	GIN4	GIN4	NA	1.64505	5.3976e-20	Autophosphorylated kinase; role in pseudohyphal-hyphal switch and cytokinesis; phosphorylates Cdc11p on S395; necessary for septin ring within germ tube but not for septin band at mother cell junction; physically associates with septins
orf19.2227	C2_06760C_A		NA	NA	-1.74117	6.56027e-20	Protein of unknown function; flow model biofilm induced; nitric oxide-repressed
orf19.3678	C1_02210W_A		NA	NA	-2.16195	7.08215e-20	Protein of unknown function
orf19.7362	C3_05810C_A	SKN1	NA	NA	2.01273	8.48511e-20	Protein with a role in beta-1,6-glucan synthesis; probable N-glycosylated type II membrane protein; transcript and mRNA length change induced by yeast-hypha transition; induced by Rim101, caspofungin; rat catheter and Spider biofilm induced
orf19.3207	C5_01680C_A	CCN1	NA	NA	1.43197	1.21538e-19	G1 cyclin; required for hyphal growth maintenance (not initiation); cell-cycle regulated transcription (G1/S); Cdc28p-Ccn1p initiates Cdc11p S394 phosphorylation on hyphal induction; expression in S. cerevisiae inhibits pheromone response
orf19.3854	CR_06040W_A		SAT4	NA	1.21845	2.06565e-19	Ortholog of S. cerevisiae Sat4; amphotericin B induced; clade-associated gene expression; Spider biofilm induced
orf19.2032	C2_00920W_A		NA	NA	1.18593	2.51701e-19	Protein of unknown function; rat catheter biofilm induced
orf19.655	C1_11480W_A	PHO84	PHO84	NA	2.61864	3.39625e-19	High-affinity phosphate transporter; transcript regulated by white-opaque switch; Hog1, ciclopirox olamine or alkaline induced; caspofungin, stress repressed; upregulated in RHE model; Spider and flow model biofilm induced, Hap43-induced
orf19.5604	C6_03170C_A	MDR1	FLR1	NA	1.77977	3.43886e-19	Plasma membrane MDR/MFS multidrug efflux pump; methotrexate is preferred substrate; overexpression in drug-resistant clinical isolates confers fluconazole resistance; repressed in young biofilms; rat catheter biofilm induced
orf19.5342.2	C2_10650W_A		NA	NA	-1.744	5.9865e-19	Protein of unknown function; protein newly produced during adaptation to the serum
orf19.4477	C1_04020C_A	CSH1	NA	YPL088W	2.04294	6.93613e-19	Aldo-keto reductase; role in fibronectin adhesion, cell surface hydrophobicity; regulated by temperature, growth phase, benomyl, macrophage interaction; azole resistance associated; Spider biofilm induced; rat catheter biofilm repressed
orf19.5312	C4_04000W_A	MET4	MET4	NA	1.55073	8.17951e-19	Putative transcription coactivator; predicted role in sulfur amino acid metabolism; required for yeast cell adherence to silicone substrate; Spider biofilm induced
orf19.1033	C1_03760C_A	STR2	STR2	NA	-1.19687	1.0609e-18	Protein of unknown function
orf19.271	C3_02800W_A	ADH4	NA	NA	-2.17753	1.59192e-18	Predicted 3-hydroxyacyl-CoA dehydrogenase; transcript is increased in azole-resistant strain overexpressing MDR1; transcript is increased in populations of cells exposed to fluconazole over multiple generations; mutant is viable
orf19.4377	CR_03790C_A	KRE1	KRE1	NA	1.11854	1.82774e-18	Cell wall glycoprotein; beta glucan synthesis; increases glucan content in S. cerevisiae kre1, complements killer toxin sensitivity; caspofungin induced; Spider/rat catheter/flow model biofilm induced; Bcr1-repressed in RPMI a/a biofilms
orf19.385	C1_08400C_A	GCV2	GCV2	NA	-1.9985	1.83133e-18	Glycine decarboxylase P subunit; protein of glycine catabolism; repressed by Efg1; Hog1-induced; induced by Rim101 at acid pH; transcript induced in elevated CO2; stationary phase enriched protein
orf19.1813	CR_07100W_A	FLC2	FLC2	NA	1.11876	1.88914e-18	Protein involved in heme uptake; putative FAD transporter, similar to S. cerevisiae Flc2p
orf19.7391	C3_06090C_A	OCH1	OCH1	NA	0.943193	1.9618e-18	Alpha-1,6-mannosyltransferase; initiates N-glycan outer chain branch addition; similar to S. cerevisiae Och1p; required for wild-type virulence in mouse intravenous infection; fungal-specific (no human or murine homolog)
orf19.6321	C6_00160W_A	PGA48	NA	SPI1	-1.44014	2.07076e-18	Putative GPI-anchored adhesin-like protein; similar to S. cerevisiae Spi1p, which is induced at stationary phase; transcript induced in high iron; flow model biofilm induced; Spider biofilm repressed
orf19.5528	C6_02590C_A	MOB1	MOB1	NA	-1.14285	2.3527e-18	Putative mitotic exit network component; periodic mRNA expression, peak at cell-cycle G2/M phase
orf19.4066	C2_09070C_A		NA	NA	-0.93931	3.22067e-18	Putative glycerol-3-phosphate acyltransferase; Hog1-repressed
orf19.6723	C3_07650C_A		NA	NA	2.36421	4.22227e-18	Protein of unknown function; Spider biofilm induced
orf19.4404	C4_05920C_A	PGA49	NA	NA	1.05099	4.58719e-18	Putative GPI-anchored protein
orf19.2031	C2_00930C_A	VPS24	VPS24	NA	1.13582	7.5321e-18	Protein similar to S. cerevisiae Vps24p, which is a member of the ESCRT III protein sorting complex; downregulated upon adherence to polystyrene
orf19.7219	C1_14130W_A	FTR1	FTR1	NA	-3.0613	8.01371e-18	High-affinity iron permease; required for mouse virulence, low-iron growth; iron, amphotericin B, caspofungin, ciclopirox, Hog1p, Sef1p, Sfu1p, and Hap43p regulated; complements S. cerevisiae ftr1 iron transport; Hap43p-repressed
orf19.406	C1_08590C_A	ERG1	ERG1	NA	-1.7619	9.54267e-18	Squalene epoxidase, epoxidation of squalene to 2,3(S)-oxidosqualene; ergosterol biosynthesis; allylamine antifungal drug target; NADH reducing cofactor but S. cerevisiae Erg1 uses NADPH; flow model biofilm induced; Spider biofilm repressed
orf19.1070	C1_04340C_A		YMR010W	NA	1.18876	9.64243e-18	Protein of unknown function
orf19.2891	C4_06430C_A		AFG1	NA	1.28114	9.75508e-18	Protein of unknown function
orf19.1736	CR_04680C_A		NA	NA	1.34261	9.87473e-18	Protein of unknown function; transcript detected on high-resolution tiling arrays
orf19.656	C1_11470C_A	DPP1	NA	NA	1.64893	1.54808e-17	Putative diacylglycerol pyrophosphate phosphatase of diacylglycerol production for phospholipid biosynthesis; downregulation correlates with clinical development of fluconazole resistance
orf19.6245	C1_06660W_A		NA	NA	-1.61927	1.84808e-17	Protein of unknown function; regulated by osmotic stress via Hog1 and oxidative stress (Hog1- and Cap1-independent); induced by alpha pheromone in SpiderM medium; Spider biofilm induced
orf19.7568	CR_09940W_A		SPS4	NA	2.09696	2.0836e-17	Protein of unknown function
orf19.7298	CR_09020C_A	CHS2	NA	NA	1.4544	2.14664e-17	Chitin synthase; nonessential; required for wild-type chitin deposition in hyphae; transcript regulated during dimorphic transition; Chs1 and Chs2, but not Chs3, are inhibited by the protoberberine HWY-289; flow model biofilm repressed
orf19.4883	C1_10140C_A		COS111	NA	1.87857	2.18424e-17	Protein of unknown function; S. cerevisiae ortholog Cos111 confers resistance to the antifungal drug ciclopirox olamine; constitutive expression independent of MTL or white-opaque status; Spider biofilm induced
orf19.2798	C1_07470C_A		IRC3	NA	1.43705	2.60155e-17	Putative helicase; fungal-specific (no human or murine homolog)
orf19.2501	C3_00980W_A	FLC1	NA	NA	0.964335	2.78216e-17	Protein involved in heme uptake; putative FAD transporter, similar to S. cerevisiae Flc1; regulated by iron; macrophage-induced; mutant defective in filamentous growth; Spider biofilm induced
orf19.5749	C6_03750C_A	SBA1	NA	NA	-1.079	3.92198e-17	Similar to co-chaperones; induced in high iron; farnesol-, heavy metal (cadmium) stress-induced; protein level decreases in stationary phase cultures; Hap43-repressed
orf19.6365	CR_08070W_A	PTP1	PTP1	NA	-1.06552	4.44201e-17	Phosphotyrosine-specific protein phosphatase; rat catheter biofilm induced
orf19.2552	CR_01630C_A		NA	NA	1.95447	4.49844e-17	Protein similar to S. cerevisiae Pmr1p; amphotericin B induced; previously merged with orf19.2553; unmerged from orf19.2553 in a revision of Assembly 21
orf19.5050	C1_07800W_A	MTO1	MTO1	NA	1.59466	4.68367e-17	Putative mitochondrial protein; rat catheter biofilm induced
orf19.5960	C3_04910C_A	NCE102	NCE102	NA	-1.3635	6.97696e-17	Non classical protein export protein; localized to plasma membrane; Hap43-induced gene; flow model biofilm induced; Spider biofilm induced
orf19.943	C5_00460C_A	FET33	GMC1	NA	1.06938	7.17756e-17	Putative multicopper ferro-O2-oxidoreductase; repressed in core caspofungin response; fails to complement S. cerevisiae fet3 iron-related phenotypes; rat catheter and Spider biofilm induced
orf19.7194	C7_03880C_A		NA	NA	1.57571	7.97982e-17	Protein required for virulence in reconstituted human epithelium (RHE) model of ex vivo infection; decreased transcription is observed upon fluphenazine treatment; induced upon adherence to polystyrene
orf19.3501	C6_02090C_A		PXL1	NA	1.21095	1.07792e-16	S. cerevisiae ortholog Pxl1 localizes to sites of polarized growth and is required for selection and/or maintenance of polarized growth sites; Hog1p-repressed
orf19.5704	C6_03440W_A		CCM1	NA	1.51265	1.30799e-16	Protein of unknown function
orf19.4411	C4_06010C_A	HOS1	HOS1	NA	1.62234	1.4257e-16	Histone deacetylase; similar to S. cerevisiae Hos1; has conserved deacetylation motif; slightly greater expression in white cells than in opaque cells
orf19.4937	C1_13110C_A	CHS3	CHS3	NA	0.790876	1.44569e-16	Major chitin synthase of yeast and hyphae; synthesizes short-chitin fibrils; Chs4-activated; transcript induced at yeast-hyphal transition; Chs1 and Chs2, but not Chs3, are inhibited by the protoberberine HWY-289; Spider biofilm induced
orf19.2475	C1_05760C_A	PGA26	NA	NA	-3.98857	1.50326e-16	GPI-anchored adhesin-like protein of the cell wall; role in cell wall integrity; required for normal virulence; induced in high iron and during cell wall regeneration; Hap43-repressed
orf19.4923	C1_12930C_A		NA	NA	1.99871	1.5104e-16	Predicted membrane transporter; sugar porter (SP) family member, major facilitator superfamily; caspofungin induced; Spider biofilm induced
orf19.7498	CR_00360C_A	LEU1	LEU1	NA	-1.20266	1.86747e-16	3-isopropylmalate dehydratase; antigenic in humans; repressed in hyphae; alkaline repressed; upregulated by human whole blood or PMNs; regulated by Sef1, Sfu1, and Hap43; rat catheter biofilm induced, Spider biofilm repressed
orf19.2079	C2_00480C_A	PHHB	YHL018W	NA	-1.60764	2.12524e-16	Putative 4a-hydroxytetrahydrobiopterin dehydratase; transposon mutation affects filamentous growth; flow model biofilm induced; Spider biofilm induced
orf19.3548.1	C2_05180W_A	WH11	NA	NA	-1.73613	2.15019e-16	White-phase yeast transcript; expression in opaques increases virulence/switching; mutant switches as WT; Hap43, hypoxia, ketoconazol induced; required for RPMI biofilm; Bcr1-induced in RPMI a/a biofilm; rat catheter, Spider biofilm induced
orf19.7434	C3_06450W_A	GLG2	NA	NA	2.06279	2.21787e-16	Putative self-glucosylating initiator of glycogen synthesis; expression regulated upon white-opaque switch; hypha-induced; Spider biofilm induced
orf19.411	C1_05540C_A		NA	NA	-1.54494	2.64003e-16	Protein similar to GTPase regulators; induced in low iron; transcript activated by Mnl1 under weak acid stress; Hap43-, Sfu1- and Sef1-regulated; flow model biofilm induced, Spider biofilm induced
orf19.6548	C7_01760C_A	ISU1	ISU1	NA	-1.09355	2.70596e-16	Protein with similarity to NifU; possible role in iron-sulfur cluster biogenesis; induced in low iron; rat catheter biofilm induced; rat catheter and Spider biofilm induced
orf19.1369	C2_09810C_A		NA	NA	1.34999	2.9196e-16	Protein with predicted peptidase domains; Hap43-repressed gene
orf19.7084	C7_00360W_A	DFI1	NA	NA	0.807496	3.5042e-16	Cell-surface associated glycoprotein; promotes activation of Cek1 in a matrix-dependent manner; N-glycosylated; Spider biofilm induced
orf19.4929	C1_13010W_A		NA	NA	1.10374	3.89583e-16	Protein of unknown function
orf19.403	C1_08570C_A	PCL2	PCL2	NA	2.33756	3.92914e-16	Cyclin homolog; reduced expression observed upon depletion of Cln3; farnesol regulated; periodic mRNA expression, peak at cell-cycle G1/S phase; Hap43-induced; rat catheter biofilm repressed
orf19.2691	C4_03000C_A		NA	NA	-1.67954	4.15865e-16	Planktonic growth-induced gene
orf19.5483	C2_06200C_A		GUF1	NA	0.936446	4.27271e-16	Protein of unknown function
orf19.1655.3	C3_01910C_A		PMP3	NA	-0.71291	4.28737e-16	Protein of unknown function
orf19.753	C1_04900W_A	MNN15	MNT4	NA	1.55075	4.63895e-16	Putative alpha-1,3-mannosyltransferase; predicted role in protein O-linked glycosylation; Spider biofilm induced
orf19.445	C1_05210C_A		YNR040W	NA	0.951959	4.86897e-16	Protein of unknown function; repressed by prostaglandins
orf19.5094	C1_08170C_A	BUL1	NA	NA	1.23707	4.86897e-16	Protein similar but not orthologous to S. cerevisiae Bul1; a protein involved in selection of substrates for ubiquitination; mutants are viable; macrophage/pseudohyphal-induced; rat catheter biofilm induced
orf19.3829	C4_04530C_A	PHR1	NA	GAS1	1.63294	5.04919e-16	Cell surface glycosidase; may act on cell-wall beta-1,3-glucan prior to beta-1,6-glucan linkage; role in systemic, not vaginal virulence (neutral, not low pH); high pH or filamentation induced; Bcr1-repressed in RPMI a/a biofilm
orf19.1822	C1_06280C_A	UME6	NA	UME6	2.7196	6.37931e-16	Zn(II)2Cys6 transcription factor; role in hyphal extension, virulence, adherence to plastic; rat catheter biofilm induced; has a long 5'-UTR that regulates translational efficiency and controls transition to filamentous growth
orf19.5521	C6_02520W_A	ISA1	ISA1	NA	-1.10236	6.67172e-16	Putative mitochondrial iron-sulfur protein; alkaline repressed; induced in high iron; regulated by Sef1, Sfu1, Hap43; Spider biofilm induced
orf19.122	C6_01150W_A	CDC20	CDC20	NA	-1.04899	7.00655e-16	Activator of anaphase-promoting complex/cyclosome; induced under Cdc5 depletion; member of conserved Mcm1 regulon; mRNA expression peaks at cell-cycle G2/M phase; mRNA binds She3 and is localized to buds of yeast cells and to hyphal tips
orf19.4690	C4_00990W_A		NA	NA	2.33477	7.28364e-16	NRAMP metal ion transporter domain-containing protein; induced by nitric oxide independent of Yhb1; flow model biofilm induced; rat catheter biofilm repressed
orf19.775	C1_04700C_A		NA	NA	-0.952853	7.50105e-16	Protein of unknown function
orf19.220	C2_08870C_A	PIR1	PIR1	NA	-1.39485	7.98509e-16	1,3-beta-glucan-linked cell wall protein; N-mannosylated, O-glycosylated by Pmt1; cell wall defect in het mutant; Hog1/fluconazole/hypoxia induced; iron/Efg1/Plc1/temp regulated; flow model biofilm induced; hyphal, Spider biofilm repressed
orf19.4308	C5_02840C_A	HSL1	HSL1	NA	0.968863	8.55238e-16	Probable protein kinase involved in determination of morphology during the cell cycle of both yeast-form and hyphal cells via regulation of Swe1p and Cdc28p; required for full virulence and kidney colonization in mouse systemic infection
orf19.7085	C7_00350C_A		NA	NA	-1.0206	8.82571e-16	Protein of unknown function; induced in core stress response; induced by cadmium stress via Hog1; oxidative stress-induced via Cap1; induced by Mnl1 under weak acid stress; macrophage-repressed; rat catheter and Spider biofilm induced
orf19.4765	C1_09080C_A	PGA6	NA	NA	2.23292	1.05114e-15	GPI-anchored cell wall adhesin-like protein; induced by high iron; upregulated upon Als2 depletion; mRNA binds She3 and is localized to hyphal tips; Spider biofilm repressed
orf19.4160	C4_00810C_A		QRI7	NA	2.53358	1.07439e-15	Protein of unknown function
orf19.2925	C1_02380C_A		CIN4	NA	1.47627	1.08501e-15	Protein of unknown function
orf19.944	C5_00450C_A	IFG3	NA	NA	1.28806	1.36344e-15	Putative D-amino acid oxidase; Spider biofilm induced
orf19.2172	C2_08130W_A	ARA1	ARA1	NA	-1.57338	1.36393e-15	D-Arabinose dehydrogenase; dehydro-D-arabinono-1,4-lactone synthesis; active on D-arabinose, L-fucose, L-xylose, L-galactose; inhibited by metal ions, thiol group-specific reagents; induced on polystyrene adherence; Spider biofilm induced
orf19.4330	C5_03030W_A		NA	NA	1.5174	1.51181e-15	Protein of unknown function
orf19.670.2	C1_11320C_A		NA	NA	-1.40326	1.60278e-15	Protein of unknown function; hypoxia, Hap43-repressed; ketoconazole induced; induced in oralpharyngeal candidasis; 16h flow model biofilm repressed, late-stage flow model biofilm induced; rat catheter and Spider biofilm induced
orf19.2107.1	C2_00250W_A	STF2	NA	NA	-1.12979	1.6896e-15	Protein involved in ATP biosynthesis; repressed in hyphae; repressed by Efg1, Hap43; transcript upregulated in clinical isolates from HIV+ patients with oral candidiasis; rat catheter, flow model and Spider biofilm induced
orf19.2451	C1_05960W_A	PGA45	NA	NA	-2.85653	2.28663e-15	Putative GPI-anchored cell wall protein; repressed in core caspofungin response; Hog1-induced; regulated by Ssn6; Mob2-dependent hyphal regulation; flow model biofilm induced
orf19.6387	CR_08250C_A	HSP104	HSP104	NA	-1.27504	2.467e-15	Heat-shock protein; roles in biofilm and virulence; complements chaperone, prion activity in S. cerevisiae; guanidine-insensitive; heat shock/stress induced; repressed in farnesol-treated biofilm; sumoylation target; Spider biofilm induced
orf19.4041	C5_05430W_A	PEX4	PEX4	NA	-1.18695	2.47768e-15	Putative peroxisomal ubiquitin conjugating enzyme; regulated by Sef1, Sfu1, and Hap43; rat catheter biofilm induced; Spider biofilm induced
orf19.4589	C4_02040W_A		FMS1	NA	0.834535	2.93763e-15	Protein of unknown function
orf19.2209	C2_07730W_A	YVC1	YVC1	NA	0.869889	3.0094e-15	Putative vacuolar cation channel shock; repressed by alpha pheromone in SpiderM medium; flow model biofilm repressed
orf19.4584	C4_02070W_A	PHO114	NA	NA	1.55383	3.323e-15	Acid phosphatase; induced by Mnl1 under weak acid stress; Spider biofilm induced
orf19.2364	CR_07010W_A	MIS11	MIS1	NA	-1.17701	3.46285e-15	Predicted mitochondrial C1-tetrahydrofolate synthase precursor; putative protein of glycine catabolism; repressed by Efg1; fluconazole-induced; stationary phase enriched protein; rat catheter and Spider biofilm repressed
orf19.2382	CR_03400W_A		ISM1	NA	1.47469	3.94462e-15	Protein similar to isoleucyl-tRNA synthetase; isoleucyl-tRNA synthetase is the target of drugs including the cyclic beta-amino acid icofungipen/PLD-118/BAY-10-8888 and mupirocin
tR(CCU)1	C3_01240C_A	tR(CCU)1	NA	NA	2.55658	4.06951e-15	tRNA-Arg, predicted by tRNAscan-SE; CCU anticodon
orf19.719	CR_06470W_A		HRD1	NA	-0.712113	4.10526e-15	Protein of unknown function
orf19.1618	C3_02280C_A	GFA1	NA	NA	0.540253	4.47091e-15	Glucosamine-6-phosphate synthase, homotetrameric enzyme of chitin/hexosamine biosynthesis; inhibited by UDP-GlcNAc, FMDP, N-acyl peptide, kanosamine-6-P; functional homolog of S. cerevisiae Gfa1p; Cagrowth-phase regulated; catalytic Cys
orf19.5760	C6_03850C_A	IHD1	YFL067W	NA	-1.70567	4.47091e-15	GPI-anchored protein; alkaline, hypha-induced; regulated by Nrg1, Rfg1, Tup1 and Tsa1, Tsa1B in minimal media at 37; oralpharyngeal candidasis induced ; Spider biofilm induced; regulated in Spider biofilms by Tec1, Efg1, Ndt80, Rob1, Brg1
orf19.3264.1	CR_00910W_A		NA	NA	-0.930353	4.49141e-15	Protein of unknown function; Spider biofilm repressed
orf19.4418	C4_06070C_A	FMT1	FMT1	NA	1.42014	4.53397e-15	Putative methionyl-tRNA transformylase; induced upon adherence to polystyrene
orf19.6968	C3_05320W_A		YDL073W	NA	-1.44539	5.08525e-15	Protein of unknown function; Hog1-repressed; Spider biofilm induced
orf19.669	C1_11340W_A	PRM1	PRM1	NA	1.9168	5.23517e-15	Putative membrane protein with a predicted role in membrane fusion during mating; Hap43p-repressed gene; protein induced during the mating process
orf19.5971	C3_05020W_A		MTC6	NA	1.015	5.40069e-15	Protein of unknown function
orf19.7109	C7_00140C_A		YGL242C	NA	1.12636	5.85941e-15	Protein of unknown function
orf19.4455	C1_07130C_A		NA	NA	1.20657	5.91774e-15	Protein of unknown function; Spider biofilm induced
orf19.949	C5_00400C_A		NA	NA	-0.770753	7.33007e-15	Protein of unknown function
orf19.1651	C3_01970C_A		NA	NA	2.27706	7.83827e-15	Protein of unknown function
orf19.3212	C5_03990W_A	MID1	MID1	NA	0.927574	1.13194e-14	Putative stretch-activated Ca2+ channel of the high affinity calcium uptake system; role in thigmotropism; decreased transcription is observed upon fluphenazine treatment or in an azole-resistant strain with CDR1 and CDR2 overexpression
orf19.3007.2	C1_03150C_A		NA	NA	-1.25124	1.13698e-14	Protein of unknown function
orf19.1671	C3_01730C_A	UTR2	UTR2	NA	0.914622	1.41226e-14	Putative GPI anchored cell wall glycosidase; role in adhesion, hyphal growth on Spider (not serum) medium; chitin-binding, glycosyl hydrolase domains; induced during cell wall regeneration; mRNA in yeast-form cells; Spider biofilm induced
orf19.5816	C2_02880C_A	EBP7	NA	NA	1.13341	1.55652e-14	Putative NADPH oxidoreductase; mutation confers hypersensitivity to toxic ergosterol analog; oxidative stress-induced via Cap1p
orf19.6248	C1_06620C_A		NA	NA	2.3861	1.56528e-14	Protein of unknown function
orf19.4476	C1_04010C_A		NA	YPL088W	1.64739	2.02128e-14	Protein with a NADP-dependent oxidoreductase domain; transcript induced by ketoconazole; rat catheter and Spider biofilm induced
orf19.5635	C4_00120W_A	PGA7	NA	NA	-2.80502	2.02128e-14	GPI-linked hyphal surface antigen; induced by ciclopirox olamine, ketoconazole, Rim101 at pH 8; Hap43, fluconazole; flow model biofilm induced; Spider biofilm induced; required for RPMI biofilm; Bcr1-induced in a/a biofilm
orf19.1885	C2_07460W_A	TAF4	TAF4	NA	-0.706577	2.09764e-14	Putative TFIID subunit; mutation confers hypersensitivity to toxic ergosterol analog
orf19.5634	C4_00110C_A	FRP1	NA	NA	-2.66192	2.25784e-14	Ferric reductase; alkaline-induced by Rim101; iron-chelation-induced by CCAAT-binding factor; fluconazole-repressed; ciclopirox-, hypoxia-, Hap43-induced; colony morphology-related regulation by Ssn6; Spider and flow model biofilm induced
orf19.3426	C6_01610W_A	ANB1	HYP2	NA	-0.800569	2.41253e-14	Translation initiation factor eIF-5A; repressed in hyphae vs yeast cells; downregulated upon phagocytosis by murine macrophage; Hap43-induced; GlcNAc-induced protein; Spider biofilm repressed
orf19.5814	C2_02900W_A		NA	NA	1.20699	2.44685e-14	Protein of unknown function; Spider biofilm induced
orf19.188	C2_04780W_A		NA	NA	1.26102	3.27671e-14	Protein of unknown function
orf19.3149	C2_06730W_A	LSP1	PIL1	NA	-0.503551	3.31015e-14	Eisosome component with a predicted role in endocytosis; protein present in exponential and stationary growth phase yeast cultures; caspofungin repressed; biofilm induced; fungal-specific (no human/murine homolog); sumoylation target
orf19.5230	C1_12340C_A	MRPS9	MRPS9	NA	1.1301	3.39829e-14	Mitochondrial ribosomal protein S9; has N-terminal mitochondrial targeting signal and an S9 consensus motif; overexpression in S. cerevisiae causes respiratory defect that is reversible upon cessation of C. albicans gene expression
orf19.7186	C7_03940C_A	CLB4	CLB4	NA	1.25126	3.60424e-14	B-type mitotic cyclin; nonessential; negative regulator of pseudohyphal growth; dispensible for mitotic exit, cytokinesis; Fkh2-represed; flow model biofilm repressed; farnesol-upregulated in biofilm; reduced total RNA in clb4 mutant
orf19.5869	C3_04260W_A		BSD2	NA	1.15364	3.63195e-14	Protein of unknown function
orf19.273	C3_02820C_A		NSG2	NA	-1.0143	4.08659e-14	Protein of unknown function
orf19.1458	C2_01510C_A		TAD2	NA	1.36058	4.0872e-14	Protein of unknown function
orf19.4322	C5_02970W_A	DAP2	DAP2	NA	-0.929866	4.35925e-14	Putative dipeptidyl aminopeptidase; transcriptionally regulated during macrophage response
orf19.5025	C1_13870W_A	MET3	MET3	NA	2.44576	4.35925e-14	ATP sulfurlyase; sulfate assimilation; repressed by Met, Cys, Sfu1, or in fluconazole-resistant isolate; Hog1, caspofungin, white phase-induced; induced on biofilm formation, even in presence of Met and Cys; Spider, F-12/CO2 biofilm induced
orf19.2756	C4_02460W_A		ERD2	NA	-0.910653	4.71411e-14	Protein of unknown function
orf19.6877	C2_05660W_A	PNG2	NA	NA	1.12225	4.79174e-14	Putative peptide:N-glycanase; gene has variable numbers of 12-bp repeats; induced by caspofungin, ciclopirox olamine, ketoconazole or hypoxia; gene of core caspofungin response; Hap43-induced; Spider biofilm induced
orf19.5812	C2_02930C_A		ETT1	NA	-1.12579	4.90656e-14	Ortholog of S. cerevisiae Ett1, a nuclear protein that inhibits replication of Brome mosaic virus; early-stage flow model biofilm induced
orf19.550	CR_04590C_A	PDX3	PDX3	NA	-1.03613	4.92431e-14	Pyridoxamine-phosphate oxidase; transcript regulated by yeast-hypha switch and by Nrg1, Mig1, Tup1; Hap43, caspofungin repressed; present in exponential and stationary phase yeast cultures
orf19.551	CR_04600W_A		NA	NA	-1.23256	4.98677e-14	Protein of unknown function
orf19.2173	C2_08120W_A	MAF1	NA	NA	-1.14533	5.42307e-14	Putative negative regulator of RNA polymerase III; decreased expression in hyphae vs yeast cells; caspofungin repressed; Spider biofilm repressed
orf19.1535	C2_02190C_A		NA	NA	-1.0408	5.7459e-14	Protein of unknown function; Hap43-induced gene
orf19.1234	C4_05530W_A	FGR6-10	NA	NA	1.16841	7.18512e-14	Protein lacking an ortholog in S. cerevisiae; member of a family encoded by FGR6-related genes in the RB2 repeat sequence; transposon mutation affects filamentous growth
orf19.3265.1	CR_00890C_A		NA	NA	-0.947675	7.18512e-14	Protein of unknown function
orf19.7342	CR_09470W_A	AXL1	AXL1	NA	0.966128	7.26992e-14	Putative endoprotease; induced by alpha factor; transcript is upregulated in an RHE model of oral candidiasis and in clinical isolates from HIV+ patients with oral candidiasis
orf19.6726	C3_07630C_A		SPT2	NA	0.864073	7.99481e-14	Protein of unknown function
orf19.6908	C7_01280C_A		FOL3	NA	1.06047	8.04503e-14	Dihydrofolate synthetase involved in folic acid biosynthesis
orf19.4391	CR_03480W_A		NA	NA	2.13017	8.07411e-14	Protein of unknown function
orf19.4199	C6_00590W_A	SLY41	SLY41	NA	-1.08646	8.34369e-14	Protein involved in ER-to-Golgi transport; rat catheter and Spider biofilm induced
orf19.3627	C2_08510W_A		NA	NA	1.60544	8.74089e-14	Protein of unknown function
orf19.1240	C4_05590W_A		YPR117W	NA	-0.992469	8.76296e-14	Protein of unknown function
orf19.6457	C7_02530C_A		YBL086C	NA	-1.06462	9.61534e-14	Protein of unknown function
orf19.5584	C6_03020W_A	PEP3	NA	NA	0.789801	9.92221e-14	Peptidase; activity useful for strain identification by multilocus enzyme electrophoresis (MLEE); clade-associated gene expression
orf19.2926	C1_02390W_A		NA	NA	0.904135	1.02816e-13	Putative nuclease required for DNA single- and double-strand break repair; rat catheter biofilm induced
orf19.711	CR_06550C_A		NA	NA	2.43805	1.05709e-13	Protein of unknown function; induced by nitric oxide; predicted ORF from Assembly 19; removed from Assembly 20; restored based on transcription data
orf19.5079	C1_08070W_A	CDR4	NA	NA	-1.2059	1.05774e-13	Putative ABC transporter superfamily; fluconazole, Sfu1, Hog1, core stress response induced; caspofungin repressed; fluconazole resistance not affected by mutation or correlated with expression; rat catheter and flow model biofilm induced
orf19.4555	C6_04130C_A	ALS4	NA	SAG1	-1.60364	1.06227e-13	GPI-anchored adhesin; role in adhesion, germ tube induction; growth, temperature regulated; expressed during infection of human buccal epithelial cells; repressed by vaginal contact; biofilm induced; repressed during chlamydospore formation
orf19.5692	C5_00060C_A		APC4	NA	0.99899	1.06373e-13	Protein of unknown function
orf19.4698	C4_00960W_A	PTC8	NA	NA	-1.06793	1.09359e-13	Predicted type 2C protein phosphatase, ser/thr-specific; required for hyphal growth; transcript induced by stress; flow model biofilm induced; Spider biofilm induced
orf19.4526	C1_01990W_A	HSP30	HSP30	NA	-3.29281	1.24547e-13	Putative heat shock protein; fluconazole repressed; amphotericin B induced; Spider biofilm induced; rat catheter biofilm induced
orf19.4274	C5_02600W_A	PUT1	PUT1	NA	1.62733	1.29126e-13	Putative proline oxidase; alkaline upregulated by Rim101; flow model biofilm induced; Spider biofilm induced
orf19.6084	C1_00190C_A		NA	NA	-2.18811	1.29193e-13	Protein of unknown function; flow model biofilm induced; Spider biofilm induced
orf19.2754	C4_02480C_A	TIM13	TIM13	NA	2.0192	1.37498e-13	Predicted mitochondrial intermembrane space protein with a role in protein import into mitochondria
orf19.2047	C2_00770W_A		YOR289W	NA	-0.863524	1.43677e-13	Putative protein of unknown function; Hap43p-repressed gene; mutation confers hypersensitivity to toxic ergosterol analog, and to amphotericin B
orf19.4215	C6_00440C_A	FET34	NA	NA	-2.31438	1.54447e-13	Multicopper ferroxidase; induced by low iron, ciclopirox olamine, ketoconazole, hypoxia; alkaline induced by Rim101; repressed in fluconazole-resistant isolate; Sfu1, Hog1 repressed; complements S. cerevisiae fet3; Spider biofilm induced
orf19.3490	C2_10420W_A	FGR6-4	NA	NA	1.11895	1.71896e-13	Protein lacking an ortholog in S. cerevisiae; member of a family encoded by FGR6-related genes in the RB2 repeat sequence; transposon mutation affects filamentous growth
orf19.6025	C1_00810W_A		ALG13	NA	-1.6201	1.83995e-13	Protein of unknown function
orf19.3204	C5_01710C_A		NA	NA	1.65545	2.02307e-13	Protein of unknown function
orf19.7479	CR_00560W_A	NTH1	NTH1	NA	-1.15777	2.10536e-13	Neutral trehalase; hyphal induction in mutant delayed but not reduced overall; not required for virulence in mice; possible regulatory cAMP-dependent phosphorylation at S10,S213; Hap43-repressed gene; Spider biofilm induced
orf19.5586	C6_03040C_A		FIG4	NA	1.0903	2.20035e-13	Protein of unknown function
orf19.2984	C1_02930C_A	MST1	MST1	NA	1.50724	2.22969e-13	Protein of unknown function
orf19.5750	C6_03760C_A	SHM2	SHM2	NA	-1.39318	2.25306e-13	Cytoplasmic serine hydroxymethyltransferase; complements glycine auxotrophy of S. cerevisiae shm1 shm2 gly1-1 mutant; antigenic; farnesol-upregulated in biofilm; stationary-phase enriched protein; rat catheter and Spider biofilm repressed
orf19.1979	C5_00880C_A	GIT3	NA	NA	1.25081	2.30108e-13	Glycerophosphocholine permease; white cell specific transcript; fungal-specific; alkaline repressed; caspofungin, macrophage/pseudohyphal-repressed; flow model biofilm induced; Spider biofilm induced
orf19.5305	C4_04050C_A	RHD3	NA	NA	-1.24661	2.54018e-13	GPI-anchored yeast-associated cell wall protein; induced in high iron; clade-associated gene expression; not essential for cell wall integrity; fluconazole-repressed; flow model and Spider biofilm repressed
orf19.5495	C2_06320W_A		NA	NA	0.898618	2.68e-13	Putative RNA-binding protein; induced by alpha pheromone in SpiderM medium
orf19.5188	C7_02770W_A	CHS1	CHS2	NA	-1.35928	2.68801e-13	Chitin synthase; essential; for primary septum synthesis in yeast and hyphae; 1 of several chitin synthases; enzymatically activated by proteolytic processing; complements defects of S. cerevisiae chs1 or chs2; Spider biofilm repressed
orf19.5735.3	C6_03670C_A		NA	NA	-1.54339	2.75652e-13	Protein of unknown function; Spider biofilm induced
orf19.2192	C2_07900W_A	GDH2	GDH2	NA	-1.37486	2.99385e-13	Putative NAD-specific glutamate dehydrogenase; fungal-specific; transcript regulated by Nrg1, Mig1, Tup1, and Gcn4; stationary phase enriched protein; flow model biofilm induced; Spider biofilm induced
orf19.410.3	C1_05560W_A	RIB4	RIB4	NA	-1.15354	4.55475e-13	Lumazine synthase (6,7-dimethyl-8-ribityllumazine synthase, DMRL synthase); catalyzes the penultimate step in the synthesis of riboflavin; Hap43-induced; rat catheter and Spider biofilm repressed
orf19.473	CR_03920C_A	TPO4	NA	NA	1.20289	4.60533e-13	Putative sperimidine transporter; fungal-specific (no human or murine homolog); Spider biofilm induced; promoter bound by Tec1 and Ndt80; Bcr1-repressed in RPMI a/a biofilms
orf19.2585	CR_01870C_A		NA	NA	-2.16981	4.91342e-13	Protein of unknown function
orf19.3870	CR_06150C_A	ADE13	ADE13	NA	-1.54272	4.93317e-13	Adenylosuccinate lyase; enzyme of adenine biosynthesis; soluble protein in hyphae; not induced during GCN response, in contrast to the S. cerevisiae ortholog; repressed by nitric oxide
orf19.1442	C2_01380W_A	PLB4.5	NA	PLB3	-3.05261	5.46146e-13	Phospholipase B; Hog1-induced; regulated by Ssn6; putative GPI-anchor; repressed during cell wall regeneration; clade-associated gene expression; Hap43-induced; rat catheter and Spider biofilm repressed
orf19.1153	C1_11660W_A	GAD1	GAD1	NA	-1.40919	5.78096e-13	Putative glutamate decarboxylase; alkaline, macrophage-downregulated gene; amphotericin B induced; induced by Mnl1 under weak acid stress; stationary phase enriched protein; rat catheter biofilm repressed
orf19.1265	C4_05790W_A		TRS130	NA	0.823456	5.83272e-13	Protein of unknown function
orf19.652	CR_05010W_A		YEN1	NA	1.02491	6.00485e-13	Protein of unknown function
orf19.3315	C1_01270W_A	CTA9	NA	NA	-1.03031	6.14672e-13	Protein required for normal filamentous growth; induced during the mating process; mRNA binds She3; activates transcription in 1-hybrid assay in S. cerevisiae
orf19.4159	C4_00820W_A		YMR166C	NA	1.72846	6.14672e-13	Protein of unknown function
orf19.3301	C1_01130W_A		MET30	NA	-0.964323	6.18883e-13	Putative ubiquitin ligase complex component; induced by heavy metal (cadmium) stress; Hog1-induced; transcript induced by Mnl1p under weak acid stress; flow model biofilm induced; Spider biofilm induced
orf19.446	C1_05200C_A		NA	NA	-0.874648	8.94069e-13	Protein of unknown function; constitutive expression independent of MTL or white-opaque status; upregulated in a cyr1 mutant
orf19.3447	C6_01370W_A		PBN1	NA	-0.660531	9.10409e-13	Protein of unknown function
orf19.2927	C1_02400C_A	MNN11	MNN11	NA	1.4256	9.70572e-13	Protein of unknown function
orf19.2661	C1_06180W_A	TLO34	NA	NA	-0.816228	9.78771e-13	Non-telomeric member of a family of telomere-proximal genes of unknown function; predicted N-terminus is extended, relative to that of other family members; overlaps orf19.2662
orf19.787	C4_03950C_A		NA	NA	1.64303	1.03509e-12	Protein of unknown function
orf19.6137	CR_07310W_A		NA	NA	1.07305	1.08951e-12	Protein of unknown function
orf19.3911	C5_04270C_A	SAH1	SAH1	NA	-1.22635	1.09792e-12	S-adenosyl-L-homocysteine hydrolase; sulfur amino acid metabolism; antigenic in human; alkaline-, fluconazole-induced expression; Gcn4-regulated; amino acid starvation (3-AT) repressed; flow model biofilm induced; Spider biofilm repressed
orf19.3730	CR_02380C_A		EMC5	NA	-0.94984	1.18076e-12	Protein similar to S. cerevisiae Kre27p, which has a role in resistance to killer toxin; predicted Kex2p substrate
orf19.1964	C5_01070C_A		NA	NA	-2.03321	1.18575e-12	Protein of unknown function; repressed by fluphenazine treatment; induced by benomyl treatment and in an RHE model; regulated by Nrg1, Tup1
orf19.3216	C5_03950W_A		NA	NA	1.0138	1.22386e-12	Similar to Rab GTPase activators; Hap43p-induced gene
orf19.88	C6_00870C_A	ILV5	ILV5	NA	-1.03795	1.24256e-12	Ketol-acid reductoisomerase; antigenic; regulated by Gcn4; GlcNAc, amino acid starvation (3-AT)-induced; macrophage-repressed protein; protein present in exponential and stationary phase; flow model and Spider biofilm repressed
orf19.190	C2_04770W_A		SWC3	NA	1.3286	1.37631e-12	Protein of unknown function
orf19.2551	CR_01620C_A	MET6	MET6	NA	-1.47784	1.47798e-12	Essential 5-methyltetrahydropteroyltriglutamate-homocysteine methyltransferase (cobalamin-independent methionine synthase); antigenic in murine/human systemic infection; heat shock, estrogen, GCN-induced; Spider biofilm repressed
orf19.850	C2_03700W_A		NA	NA	1.39737	1.65768e-12	Protein of unknown function
orf19.4148	C5_01530C_A		NA	NA	-0.864321	1.66606e-12	Protein of unknown function
orf19.6202	C1_07030C_A	RBT4	NA	PRY3	1.2386	1.69304e-12	Pry family protein; required for virulence in mouse systemic/rabbit corneal infections; not filamentation; mRNA binds She3, is localized to hyphal tips; Hap43-induced; in both yeast and hyphal culture supernatants; Spider biofilm induced
orf19.5339	C2_10600W_A		SPG5	NA	-1.11459	1.71255e-12	Ortholog of S. cerevisiae Spg5; required for proteasome assembly during quiescence; transcript detected on high-resolution tiling arrays; Spider biofilm induced
orf19.7547	CR_09750C_A		PIB1	NA	-1.00319	1.97804e-12	Protein of unknown function
orf19.7380	C3_05990C_A		NA	NA	2.09896	1.99265e-12	Protein of unknown function
orf19.3432	C6_01520W_A		NA	NA	1.30055	2.03091e-12	Predicted membrane transporter, member of the drug:proton antiporter (12 spanner) (DHA1) family, major facilitator superfamily (MFS); induced by nitric oxide
orf19.5576	C6_02980C_A		CAB1	NA	-0.884227	2.03553e-12	Putative pantothenate kinase; ortholog of S. cerevisiae Cab1; transposon mutation affects filamentous growth; repressed in core stress response
orf19.1429	C4_04210C_A	SOH1	SOH1	NA	1.17139	2.17515e-12	Subunit of the RNA polymerase II mediator complex; involved in control of cytokinesis, morphogenesis, biofilm formation, virulence; cell-cycle regulated periodic mRNA expression
orf19.3861	CR_06080W_A	SIS1	SIS1	NA	-0.94233	2.27607e-12	Putative Type II HSP40 co-chaperone; macrophage/pseudohyphal-repressed; heavy metal (cadmium) stress-induced; heterozygous null mutant displays sensitivity to virgineone; rat catheter biofilm induced
orf19.2111	C2_00220C_A		TFG2	NA	-0.796592	2.30878e-12	Protein of unknown function
orf19.6276	C1_06350W_A		NA	NA	-1.02758	2.41346e-12	Protein of unknown function; rat catheter biofilm repressed
orf19.4505	C2_04470W_A	ADH3	NA	NA	1.69476	2.55022e-12	Putative NAD-dependent (R,R)-butanediol dehydrogenase; regulated by white-opaque switch; induced by nitric oxide independent of Yhb1; Spider biofilm induced
orf19.3048	C1_03460C_A		NA	NA	1.35156	3.00258e-12	Protein of unknown function; repressed by alpha pheromone in SpiderM medium
orf19.7426	C3_06410C_A		OST6	NA	0.895054	3.00258e-12	Protein of unknown function
orf19.5970	C3_05010C_A		SRS2	NA	0.985686	3.2105e-12	Putative DNA repair helicase; transcriptionally induced by interaction with macrophage; fungal-specific (no human or murine homolog)
orf19.2137	C6_04510C_A		NA	NA	1.86804	3.44732e-12	Protein of unknown function
orf19.3616	C2_08610W_A	ERG9	ERG9	NA	-1.14808	3.54228e-12	Putative farnesyl-diphosphate farnesyl transferase (squalene synthase); sterol biosynthesis pathway; likely essential for growth; regulated by fluconazole, lovastatin; amphotericin B, caspofungin repressed; Spider biofilm repressed
orf19.6208	C1_07000W_A	MEF2	MEF2	NA	1.20207	3.68391e-12	Putative mitochondrial translation elongation factor; caspofungin induced
orf19.6781	C3_07200C_A	ZFU2	NA	LYS14	1.07405	3.6907e-12	Zn(II)2Cys6 transcription factor; regulator of yeast form adherence; mutants display increased colonization of mouse kidneys; required for yeast cell adherence to silicone substrate; Spider biofilm induced
orf19.968	C5_00270W_A	PGA14	YNL190W	NA	-0.909861	3.89679e-12	Putative GPI-anchored protein; induced during cell wall regeneration; regulated by Ssn6p
orf19.5953	C3_04860W_A	SFP1	SFP1	NA	-1.2221	3.99015e-12	C2H2 transcription factor; predicted regulator of ribosomal protein and biogenesis genes; possibly essential, disruptants not obtained by UAU1 method; rat catheter biofilm induced
orf19.2597	CR_01960C_A	MRS2	MRS2	NA	1.31953	4.23287e-12	Putative magnesium ion transporter, mitochondrial; fungal-specific (no human or murine homolog)
orf19.2457	C1_05920W_A		NA	NA	1.43707	4.63352e-12	Protein of unknown function; induced during chlamydospore formation in both C. albicans and C. dubliniensis; Spider biofilm induced
orf19.5705	C6_03450C_A	NAM2	NAM2	NA	1.18446	4.72076e-12	Mitochondrial leucyl-tRNA synthetase
orf19.752	C1_04910C_A		NA	NA	-1.2165	4.93035e-12	Protein of unknown function
orf19.2039	C2_00850W_A	MSF1	MSF1	NA	1.27107	5.12815e-12	Putative phenylalanine-tRNA ligase; protein level decreases in stationary phase cultures; Hap43p-repressed gene
orf19.1766	C2_10150W_A		NA	NA	1.15857	5.31596e-12	Secreted protein; fluconazole-induced
orf19.1307	C4_03710C_A		NA	YML018C	2.4229	5.74437e-12	Predicted membrane protein; rat catheter biofilm induced
orf19.4315	C5_02910C_A	GYP8	GYP8	NA	-0.861834	5.75186e-12	Protein of unknown function
orf19.1505	C2_01930C_A		YBR138C	NA	-1.11202	5.78e-12	Protein of unknown function
orf19.1097	C6_04380W_A	ALS2	NA	NA	-1.39728	5.98858e-12	ALS family protein; role in adhesion, biofilm formation, germ tube induction; expressed at infection of human buccal epithelial cells; putative GPI-anchor; induced by ketoconazole, low iron and at cell wall regeneration; regulated by Sfu1p
orf19.4894	C1_10240C_A		YER010C	NA	1.66272	6.11139e-12	Protein with similarity to S. cerevisiae Yer010cp, a protein of unknown function belonging to the prokaryotic RraA family; repressed by benomyl; Hap43-induced; Spider biofilm induced
orf19.4932	C1_13060C_A		MEF1	NA	1.90618	6.14675e-12	Protein of unknown function
orf19.778	C1_04680W_A	PIL1	LSP1	NA	-1.39661	6.77438e-12	Eisosome component; predicted role in endocytosis; echinocandin-binding protein; localizes to cell surface of hyphae, but not yeast-form cells; Hap43, YNB biofilm induced; rat catheter biofilm repressed
orf19.5669	C4_00410W_A		NA	NA	0.656992	6.81381e-12	Protein with B-cell receptor-associated protein 31-like domain; membrane-localized protein
orf19.147	C2_04660C_A	YAK1	YAK1	NA	-1.19766	6.82034e-12	Predicted serine-threonine protein kinase; involved in hyphal growth regulation and biofilm formation; flow model biofilm induced; induced in core caspofungin response
orf19.6124	CR_07440W_A	ACE2	ACE2	NA	-1.21002	7.20439e-12	Transcription factor; similar to S. cerevisiae Ace2 and Swi5; regulates morphogenesis, cell separation, adherence, virulence in a mice; mutant is hyperfilamentous; rat catheter and Spider biofilm induced
orf19.1608	C3_02360C_A		NA	NA	1.86129	1.00812e-11	Protein of unknown function
orf19.903	C2_03270W_A	GPM1	GPM1	NA	-1.01685	1.00812e-11	Phosphoglycerate mutase; surface protein that binds host complement Factor H and FHL-1; antigenic; fluconazole, or amino acid starvation (3-AT) induced, farnesol-repressed; Hap43, flow model biofilm induced; Spider biofilm repressed
orf19.6028	C1_00780C_A	HGC1	CLN2	NA	1.37928	1.17952e-11	Hypha-specific G1 cyclin-related protein involved in regulation of morphogenesis, biofilm formation; Cdc28-Hgc1 maintains Cdc11 S394 phosphorylation during hyphal growth; required for virulence in mice; regulated by Nrg1, Tup1, farnesol
orf19.1528	C2_02120W_A		MTF1	NA	1.31441	1.23872e-11	Putative mitochondrial RNA polymerase specificity factor; possibly an essential gene, disruptants not obtained by UAU1 method
orf19.6824	C3_06790W_A	TRY6	NA	NA	2.3425	1.29645e-11	Helix-loop-helix transcription factor; regulator of yeast form adherence; required for yeast cell adherence to silicone substrate; Spider and F-12/CO2 biofilm induced; repressed by alpha pheromone in SpiderM medium
orf19.290	C3_02960C_A	KRE5	KRE5	NA	0.972427	1.38365e-11	UDP-glucose:glycoprotein glucosyltransferase; 1,6-beta-D-glucan biosynthesis, hyphal growth, virulence in mouse IV model; partially complements S. cerevisiae kre5 mutant defects; flow biofilm repressed, Bcr1-repressed in RPMI a/a biofilms
orf19.414	C1_05500W_A	RSM22	RSM22	NA	1.52923	1.43799e-11	Predicted mitochondrial small ribosomal subunit; rat catheter and Spider biofilm induced
orf19.6983	C3_05450C_A		NA	NA	-1.13202	1.48081e-11	Protein of unknown function; Hap43-repressed gene; repressed by nitric oxide; Spider biofilm induced
orf19.4816	C1_09520C_A		YMR209C	NA	-1.07936	1.49256e-11	Protein of unknown function; induced by nitric oxide
orf19.3885	CR_06310W_A		NA	NA	1.61114	1.54331e-11	Has domain(s) with predicted N-acetyltransferase activity; highly induced during chlamydospore formation in both C. albicans and C. dubliniensis
orf19.2474	C1_05770C_A	PRC3	YBR139W	NA	0.797252	1.5635e-11	Putative carboxypeptidase Y precursor; transcript regulated by Nrg1 and Mig1; regulated by Gcn2 and Gcn4
orf19.6698	C7_03640C_A		SLM5	NA	1.03139	1.5635e-11	Protein of unknown function
orf19.3651	C6_00750C_A	PGK1	PGK1	NA	-0.971592	1.70317e-11	Phosphoglycerate kinase; localizes to cell wall and cytoplasm; antigenic in murine/human infection; flow model biofilm, Hog1-, Hap43-, GCN-induced; repressed upon phagocytosis; repressed in Spider biofilms by Bcr1, Ndt80, Rob1, Brg1
orf19.508	CR_04210C_A	QDR1	QDR1	NA	-0.842333	1.77814e-11	Putative antibiotic resistance transporter; regulated by white-opaque switch, Nrg1, Tup1; Hap43, caspofungin repressed; repressed during chlamydospore formation; flow model biofilm induced; Spider biofilm repressed
orf19.5671	C4_00420C_A		SYP1	NA	-0.891679	1.77814e-11	Protein of unknown function
orf19.976	C5_00210C_A	BRE1	BRE1	NA	-0.908099	1.77814e-11	Putative transcription factor with C3HC4 zinc finger DNA-binding motif; similar to S. cerevisiae Bre1p; transposon mutation affects filamentous growth
orf19.6565	C7_01600W_A		OXA1	NA	1.43059	1.98742e-11	Conserved mitochondrial inner membrane insertase; mediates insertion of mitochondrial- and nuclear-encoded proteins from the matrix into the inner membrane; Spider biofilm repressed
orf19.5741	C6_03700W_A	ALS1	NA	NA	1.31771	2.25803e-11	Cell-surface adhesin; adhesion, virulence, immunoprotective roles; band at hyphal base; Rfg1, Ssk1, Spider biofilm induced; flow model biofilm repressed; CAI-4 strain background effects; promoter bound Bcr1, Tec1, Efg1, Ndt80, and Brg1
orf19.4739	C1_08810C_A	MSS116	MSS116	NA	0.907637	2.31187e-11	Putative DEAD-box protein; required for efficient splicing of mitochondrial Group I and II introns; Hap43-induced; rat catheter biofilm induced
orf19.4349	C5_03170C_A		NA	NA	-1.03968	2.5131e-11	Protein of unknown function; transcript repressed by elevated CO2; Spider biofilm induced
orf19.4494	C2_04560W_A	KTR2	NA	NA	-1.28976	2.52126e-11	Mannosyltransferase; transcription elevated in chk1, nik1, and sln1 homozygous null mutants; fungal-specific (no human or murine homolog); possibly an essential gene, disruptants not obtained by UAU1 method
orf19.6958	C3_03630W_A	ECM18	ECM18	NA	0.989923	2.5698e-11	Protein of unknown function
orf19.5917.3	C3_04590W_A		YRA1	NA	-0.971446	2.69744e-11	RNA binding protein required for export of poly(A)+ mRNA from the nucleus; Spider biofilm repressed
orf19.6703	C7_03680W_A		NA	NA	0.95255	2.80478e-11	Protein of unknown function
orf19.3932.1	C5_04480C_A		NA	NA	1.60992	2.87278e-11	Protein of unknown function
orf19.5544	C6_02730W_A	SAC6	SAC6	NA	0.739927	2.87278e-11	Fimbrin; actin filament bundling protein; transcript regulated by Nrg1 and Mig1; protein level decreases in stationary phase
orf19.5525	C6_02560W_A		YMR315W	NA	-1.61719	2.9065e-11	Putative oxidoreductase; protein levels affected by URA3 expression in CAI-4 strain background; Efg1, Efh1 regulated; Rgt1-repressed; protein present in exponential and stationary growth phase yeast; rat catheter biofilm repressed
orf19.675	C1_11270W_A		NA	NA	1.27466	3.05151e-11	Cell wall protein; induced in core stress response and core caspofungin response; iron-regulated; amphotericin B, ketoconazole, and hypoxia induced; regulated by Cyr1, Ssn6; induced in oralpharyngeal candidasis; Spider biofilm repressed
orf19.1333	C7_03420C_A	SNG3	NA	NA	-0.716663	3.81006e-11	Putative membrane transporter; Hap43p-induced gene; mutation confers hypersensitivity to toxic ergosterol analog; shows colony morphology-related gene regulation by Ssn6p
orf19.4151	C5_01570C_A	SPO1	SPO1	NA	1.39396	3.84441e-11	Protein similar to phospholipase B; fungal-specific (no human or murine homolog)
orf19.2736	C4_02630C_A	HFL2	BUR6	NA	-0.636116	3.91592e-11	HAP5-like; ortholog of S. cerevisiae Bur6, a heterodimeric NC2 transcription regulator complex subunit; flucytosine induced
orf19.4342	C5_03130W_A	SUT1	SUT1	NA	-1.33483	3.99439e-11	Zn2Cys6 transcription factor involved in sterol uptake; flow model biofilm induced; Spider biofilm repressed
orf19.6638	CR_05740C_A	PTC4	PTC4	NA	-1.2414	4.21363e-11	Type PP2C serine/threonine phosphatase; localized to mitochondria; mutation causes sensitivity to sodium, potassium and azole drugs; decreased expression in hyphae compared to yeast-form cells
orf19.2265	C2_07100W_A		SNF12	NA	-0.783314	4.50842e-11	Protein of unknown function
orf19.3243	CR_01110W_A	SRP54	SRP54	NA	-0.644163	4.93492e-11	Putative signal recognition particle (SRP) subunit; induced in ssr1 null; Spider biofilm repressed
orf19.5620	C6_03320W_A		YHI9	NA	-1.13081	5.08681e-11	Stationary phase enriched protein; Gcn4-regulated; induced by amino acid starvation (3-AT), benomyl or in azole-resistant strain that overexpresses MDR1; flow model biofilm induced; rat catheter biofilm repressed; overlaps orf19.5621
orf19.7425	C3_06400C_A		UNG1	NA	1.10947	5.28212e-11	Protein of unknown function
orf19.7239	C1_14290C_A	MDG1	MDG1	NA	-1.36068	5.37194e-11	Protein of unknown function
orf19.3606	C2_08700C_A		SNA4	NA	-0.956097	5.54784e-11	Ortholog of S. cereviae Sna4 vacuolar outer membrane protein that plays a role in sensitivity to NA+; induced by Mnl1 under weak acid stress
orf19.2553	CR_01640C_A		NA	NA	1.90338	6.78908e-11	Protein similar to S. cerevisiae Pmr1p; amphotericin B induced; previously merged with orf19.2552 in Assembly 20; unmerged from orf19.2552 in a revision of Assembly 21
orf19.2681	C4_03100W_A	RBT7	NA	NA	1.59181	7.2928e-11	Protein with similarity to RNase T2 enzymes; has putative secretion signal; expression is Tup1-repressed
orf19.6225	C1_06850W_A	PCL7	PCL6	NA	-1.07532	7.2928e-11	Putative cyclin-like protein; possible Pho85 cyclin; hyphal repressed; induced by Mnl1 under weak acid stress
orf19.7382	C3_06010W_A	CAM1	CAM1	NA	-0.790451	7.2928e-11	Putative translation elongation factor eEF1 gamma; protein level decreased in stationary phase cultures; Spider biofilm repressed
orf19.6681	C5_03690W_A		NA	NA	1.07919	7.3535e-11	Protein of unknown function; Spider biofilm induced
orf19.7017	C7_00970C_A	YOX1	YOX1	NA	1.28009	7.9158e-11	Putative homeodomain-containing transcription factor; transcriptional repressor; periodic mRNA expression, peak at cell-cycle G1/S phase
orf19.1133	C1_03710C_A	MSB1	MSB1	NA	0.93847	7.99343e-11	Putative regulator of transcription; expression in S. cerevisiae flo8 and flo11 mutants suggests a role in regulation of adhesion factors
orf19.1862	C2_07630C_A		RTC3	NA	-1.56257	8.24802e-11	Possible stress protein; increased transcription associated with CDR1 and CDR2 overexpression or fluphenazine treatment; regulated by Sfu1, Nrg1, Tup1; stationary phase enriched protein; Spider biofilm induced
orf19.1224	C2_06680W_A	FRP3	ATO2	NA	-1.10036	8.6347e-11	Putative ammonium transporter; upregulated in the presence of human neutrophils; fluconazole-downregulated; repressed by nitric oxide; Spider biofilm induced; rat catheter biofilm repressed
orf19.6758	C3_07330W_A		NA	GCY1	0.899611	8.6347e-11	Predcted glucose 1-dehydrogenase (NADP+); rat catheter biofilm repressed
orf19.5867	C3_04250W_A	WSC1	NA	NA	0.886879	8.67386e-11	Putative cell wall component; transcript upregulated in cyr1 mutant (yeast or hyphae); Spider and flow model biofilm induced
ITS2	CR_08800W_A	ITS2	NA	NA	-1.20942	8.74931e-11	Non-coding region in the 55 copies of rDNA repeat, between RDN58 and RDN25; in S. cerevisiae it is transcribed as part of the 35S precursor that is processed during rRNA maturation to yield 18S, 5.8S, and 25S rRNA species
orf19.7283	CR_08880C_A		NA	NA	-2.14248	8.86948e-11	Protein of unknown function; rat catheter and Spider biofilm induced
orf19.1774	C2_10070W_A		NA	NA	1.89493	8.94642e-11	Predicted dehydrogenase; transcript upregulated in an RHE model of oral candidiasis; virulence-group-correlated expression; Spider biofilm repressed
orf19.486	CR_04030W_A	NIP100	NIP100	NA	0.815218	1.0201e-10	p150 subunit of dynactin; required for normal spindle formation and position
orf19.5169	C7_02920W_A		NA	AMD2	2.34683	1.08449e-10	Protein of unknown function
orf19.341	C3_03440C_A		NA	NA	1.6197	1.08863e-10	Putative spermidine export pump; fungal-specific (no human or murine homolog)
orf19.6308	CR_04850C_A		NA	NA	0.909046	1.12019e-10	Protein of unknown function
orf19.2507	C3_01030W_A	ARP9	ARP9	NA	-0.560263	1.14859e-10	Protein similar to S. cerevisiae Arp3p, a component of the Arp2/3 complex involved in actin-dependent processes; likely to be essential for growth, based on an insertional mutagenesis strategy
orf19.3664	C1_02070W_A	HSP31	NA	NA	-1.88508	1.24302e-10	Putative 30 kda heat shock protein; repressed during the mating process; rat catheter biofilm induced
orf19.6888	C2_05770W_A		NA	NA	1.26247	1.30186e-10	Zn(II)2Cys6 domain transcription factor; regulated by Mig1 and Tup1; rat catheter and Spider biofilm induced
orf19.2417	CR_03100W_A	SMC5	SMC5	NA	0.910257	1.35754e-10	Protein similar to S. cerevisiae Smc5p, which is involved in DNA repair; transposon mutation affects filamentous growth
orf19.1291	C4_05290W_A	ABZ1	ABZ1	NA	0.900611	1.36327e-10	Protein of unknown function
orf19.2452	C1_05950C_A		NA	NA	-1.95512	1.3864e-10	Protein of unknown function; induced in high iron; repressed in core caspofungin response; ketoconazole-repressed; colony morphology-related gene regulation by Ssn6; possibly subject to Kex2 processing
orf19.3626	C2_08530C_A		YML096W	NA	1.65057	1.43787e-10	Protein of unknown function
orf19.5191	C7_02750W_A	FGR6-1	NA	NA	1.1405	1.46879e-10	Protein lacking an ortholog in S. cerevisiae; member of a family encoded by FGR6-related genes in the RB2 repeat sequence; transposon mutation affects filamentous growth
orf19.510	CR_04220C_A		NA	NA	-1.04803	1.61023e-10	Protein of unknown function; Spider biofilm induced
orf19.772.1	C1_04720W_A		NA	NA	-0.844156	1.95525e-10	Protein of unknown function
orf19.4884	C1_10150W_A	WOR1	MIT1	NA	1.87669	1.96752e-10	Transcription factor ("master switch") of white-opaque phenotypic switching; required to establish and maintain the opaque state; opaque-specific, nuclear; regulates its own expression; suggested role in regulation of adhesion factors
orf19.1592	C2_04300C_A		YPL041C	NA	-0.915857	2.06294e-10	Protein of unknown function; Spider biofilm induced
orf19.1075	C6_04190C_A		NA	NA	-1.64796	2.07455e-10	Protein of unknown function; Spider biofilm induced
orf19.2680	C4_03110W_A		DNF3	NA	1.06677	2.40947e-10	Protein of unknown function
orf19.3639	C2_08420W_A		MAG1	NA	0.840641	2.50412e-10	Protein of unknown function
orf19.93	C6_00920W_A		MIX17	NA	-0.74768	2.59347e-10	Putative mitochondrial intermembrane space protein; colony morphology-related gene regulation by Ssn6; regulated by Sef1, Sfu1, and Hap43; Spider biofilm repressed; rat catheter biofilm induced
orf19.1663	C3_01830C_A	MNT2	KRE2	NA	1.12398	2.59482e-10	Alpha-1,2-mannosyl transferase; adds 3rd mannose in cell-wall mannoprotein biosynthesis; partially redundant with Mnt1; role in adherence and virulence; expressed in yeast and hyphae; fungal-specific; Hap43-induced; Spider biofilm induced
orf19.2767	C4_02370C_A	PGA59	NA	NA	-0.828728	2.63416e-10	Adhesin-like cell wall protein; putative GPI-anchor; colony morphology-related gene regulation by Ssn6; Hap43-induced; Spider biofilm repressed
orf19.6913	C7_01330C_A	GCN2	GCN2	NA	0.647024	2.7353e-10	Translation initiation factor 2-alpha (eIF2alpha) kinase; has nonessential role in amino acid starvation response, in contrast to S. cerevisiae homolog; similar to S. cerevisiae Gcn2p
orf19.5718	C6_03520C_A		NA	NA	1.13332	2.74475e-10	Protein of unknown function
orf19.1415	C4_04320W_A	FRE10	NA	FRE2	-1.72996	2.75884e-10	Major cell-surface ferric reductase under low-iron conditions; 7 transmembrane regions and a secretion signal predicted; Tup1, Rim101, Ssn6, Hog1, caspofungin repressed; ciclopirox olamine induced; rat catheter biofilm induced
orf19.4712	C1_07770W_A	FGR6-3	NA	NA	1.13838	2.81879e-10	Protein lacking an ortholog in S. cerevisiae; member of a family encoded by FGR6-related genes in the RB2 repeat sequence; transposon mutation affects filamentous growth
orf19.4135	C5_01450W_A	PRC2	NA	YBR139W	1.60353	2.86231e-10	Putative carboxypeptidase; induced by human neutrophils; Spider biofilm induced
orf19.107	C6_01040C_A		DHR2	NA	1.38507	2.89473e-10	DEAH-box ATP-dependent RNA helicase, required for 18S rRNA synthesis; rat catheter biofilm induced
orf19.3675	C1_02180W_A	GAL7	GAL7	NA	-1.5329	2.89473e-10	Putative galactose-1-phoshphate uridyl transferase; downregulated by hypoxia, upregulated by ketoconazole; macrophage/pseudohyphal-repressed
orf19.1956	C5_01140C_A		MSC6	NA	0.926915	3.28454e-10	Protein of unknown function
orf19.6830	C3_06730W_A		NA	NA	1.09489	3.28865e-10	Putative enoyl-CoA hydratase; Spider biofilm induced
orf19.3618	C2_08590W_A	YWP1	NA	NA	-0.858364	3.3146e-10	Secreted yeast wall protein; possible role in dispersal in host; mutation increases adhesion and biofilm formation; propeptide; growth phase, phosphate, Ssk1/Ssn6/Efg1/Efh1/Hap43 regulated; mRNA binds She3; flow and Spider biofilm repressed
orf19.583	C5_00800C_A		BNA2	NA	-0.844262	3.387e-10	Indoleamine 2,3-dioxygenase (IDO); rate-limiting enzyme of tryptophan catabolism via kynurenine; enzyme inhibition by 1-methyl-D,L-tryptophan increases hyphal growth; expressed in yeast and hyphae; rat catheter and Spider biofilm induced
orf19.6930	C3_03850C_A	SOL1	NA	NA	-1.36214	3.45465e-10	Cell cycle regulator; partial functional homolog of S. cerevisiae Sic1p; protein degradation regulated by SCF(CDC4) pathway; CDK phosphorylation predicted
orf19.123	C6_01160W_A	RCN1	NA	NA	1.64202	3.48134e-10	Protein involved in calcineurin-dependent signaling that controls stress response and virulence; inhibits calcineurin function
orf19.3858	CR_06060W_A		NA	NA	-0.995153	3.51068e-10	Protein of unknown function; rat catheter and Spider biofilm induced
orf19.5063	C1_07900W_A	COI1	NA	NA	-1.66332	3.61834e-10	Secreted protein; ciclopirox olamine induced; regulated by Ssn6; induced by nitric oxide independent of Yhb1; Hap43-induced; Spider biofilm repressed
orf19.3483	C6_02420W_A		PGC1	NA	-0.96656	3.68777e-10	Putative phosphatidyl glycerol phospholipase C; Plc1-regulated; flow model biofilm induced; Spider biofilm induced
orf19.490	CR_04070W_A	NAT5	NAT5	NA	-0.923271	3.81192e-10	Subunit of the N-terminal acetyltransferase NatA; Spider biofilm repressed
orf19.1751	C2_10280C_A	SPT23	SPT23	NA	-0.696922	3.81623e-10	Protein involved in regulation of unsaturated fatty acid biosynthesis; controls the expression of the Ole1p delta-9-fatty acid desaturase
orf19.6472	C7_02380C_A	CYP1	CPR1	NA	-0.635514	4.26947e-10	Peptidyl-prolyl cis-trans isomerase; cyclosporin A sensitive activity; soluble in hyphae; biofilm induced, macrophage-induced protein; downregulated upon treatment of biofilm with farnesol; present in exponential and stationary phase cells
orf19.4013	C5_05200C_A		YHR045W	NA	-0.968711	4.37768e-10	Putative protein of unknown function; Hap43p-repressed gene; S. cerevisiae ortholog YHR045W localizes to the endoplasmic reticulum
orf19.7600	CR_10250C_A	FDH3	SFA1	NA	-0.750645	4.40333e-10	Glutathione-dependent formaldehyde dehydrogenase; glycine catabolism; repressed by Efg1 in yeast, not hyphal growth conditions; induced by Mnl1 under weak acid stress; Spider biofilm repressed
orf19.5876	C3_04330C_A		NA	NA	0.992369	4.49708e-10	Protein of unknown function; Cyr1-repressed; induced by alpha pheromone in SpiderM medium; rat catheter and Spider biofilm induced
orf19.3888	CR_06340C_A	PGI1	PGI1	NA	-0.807183	4.69381e-10	Glucose-6-phosphate isomerase; enzyme of glycolysis; antigenic; Efg1-regulated; induced upon adherence to polystyrene; repressed by phagocytosis, human neutrophils; flow model biofilm induced; rat catheter and Spider biofilm repressed
orf19.5519	C6_02500C_A	GCV1	GCV1	NA	-1.49191	4.75757e-10	Putative T subunit of glycine decarboxylase; transcript negatively regulated by Sfu1; Spider biofilm repressed
orf19.5677	C4_00480W_A	DUR4	NA	NA	1.71879	4.78199e-10	Putative urea permease; fungal-specific (no human or murine homolog); possibly an essential gene, disruptants not obtained by UAU1 method
orf19.6010	C1_00950C_A	CDC5	CDC5	NA	-1.24437	5.01273e-10	Polo-like kinase; member of conserved Mcm1 regulon; depletion causes defects in spindle elongation and Cdc35-dependent filamentation; virulence-group-correlated expression; likely essential (UAU1 method); Spider biofilm repressed
orf19.794	C2_04260W_A	SSN3	SSN3	NA	-0.669492	5.12804e-10	Putative cyclin-dependent protein kinase; mutants are sensitive to growth on H2O2 medium
orf19.5617	C6_03290W_A		CTI6	NA	-0.524346	5.48026e-10	Protein of unknown function
orf19.1727	C3_01250W_A	PMC1	PMC1	NA	1.18275	5.88019e-10	Vacuolar calcium P-type ATPase; transcript regulated by calcineurin and fluconazole; mutant shows increased resistance to fluconazole, lithium; increased sensitivity to calcium; Spider biofilm induced
orf19.3996	C5_05040W_A		GPI10	NA	1.00828	5.90716e-10	Putative mannosyltransferase; similar to S. cerevisiae Gpi10p; has HKEXRF motif
orf19.5058	C1_07870C_A	SMI1	SMI1	NA	-1.12356	5.9404e-10	Cell wall biosynthesis protein; Hap43, caspofungin-repressed; Cyr1-induced in hyphal cells; reduced biofilm cell wall glucan in mutant; possibly essential (UAU1 method); flow model biofilm induced
orf19.6778	C3_07230W_A		DRS2	NA	0.58005	5.94808e-10	Aminophospholipid translocase (flippase); maintains membrane lipid asymmetry in post-Golgi secretory vesicles; contributes to clathrin-coated vesicle formation and endocytosis; flow model biofilm repressed
orf19.4370	CR_03710C_A		NA	NA	-1.27326	6.00989e-10	Protein of unknown function; induced by nitric oxide; oxidative stress-induced via Cap1; fungal-specific (no human or murine homolog)
orf19.5425	C3_00420W_A		NA	NA	0.806802	6.66504e-10	Protein of unknown function
orf19.6915	C7_01340W_A	MRE11	MRE11	NA	0.594589	6.91188e-10	Putative DNA double-strand break repair factor; involved in response to oxidative stress and drug resistance
orf19.4096	C2_09350W_A	TAZ1	TAZ1	NA	1.34033	7.16201e-10	Putative lyso-phosphatidylcholine acyltransferase, required for normal phospholipid content of mitochondrial membranes; rat catheter biofilm induced
orf19.5934	C3_04740C_A		TOP3	NA	1.04066	7.29962e-10	Protein of unknown function
orf19.5102	C1_08230C_A	PLB5	NA	NA	-1.52504	7.74589e-10	Putative GPI-linked phospholipase B, fungal-specific (no mammalian homolog); null mutation eliminates cell-associated phospholipase A2 activity and attenuates virulence; fluconazole-repressed; flow model biofilm repressed
orf19.2639	C5_03410C_A		MRPL20	NA	1.10606	8.19864e-10	Protein of unknown function
orf19.3586	C2_08830W_A		RCR1	NA	-1.25421	8.57337e-10	Protein of unknown function
orf19.3915	C5_04300C_A		DUG1	NA	-0.971318	8.79616e-10	Putative metallodipeptidase; protein present in exponential and stationary growth phase yeast; Hog1-induced; Hap43-repressed; sumoylation target; Spider biofilm repressed
orf19.7598	CR_10230W_A		AHC1	NA	-0.967927	9.36719e-10	Protein of unknown function
orf19.2823	CR_02640W_A	RFG1	ROX1	NA	-0.662597	9.5104e-10	HMG domain transcriptional repressor of filamentous growth and hyphal genes; in Tup1-dependent and -independent pathways; binds DNA; transcript not regulated by oxygen or serum; not responsible for hypoxic repression; Spider biofilm induced
orf19.5015	C1_13780W_A	MYO2	MYO2	NA	0.620951	1.04566e-09	Class V myosin; nonessential; sole class V myosin in C. albicans; required for WT actin cytoskeletal polarity, nuclear organization, migration, hyphal growth; conserved myosin ATPase/tail domains; Hap43-induced; flow model biofilm repressed
orf19.3461	C6_02210W_A		NA	NA	1.10888	1.0691e-09	Protein of unknown function; oxidative stress-induced via Cap1; induced by alpha pheromone in SpiderM medium
orf19.7238	C1_14280C_A	NPL3	NPL3	NA	-0.744862	1.08468e-09	Putative RNA-binding protein; required for normal flow model biofilm growth; nuclear export is facilitated by Hmt1p; transcript upregulated in RHE model of oralcandidiasis; Spider biofilm repressed
orf19.3353	C1_01630W_A		NA	NA	-1.09826	1.09495e-09	Protein similar to a mitochondrial complex I intermediate-associated protein; fluconazole-repressed; Spider biofilm induced; rat catheter biofilm repressed
orf19.2684	C4_03080W_A		NA	NA	0.646917	1.10476e-09	Protein of unknown function; flow model biofilm repressed
orf19.74	C6_04170C_A	SEC5	SEC5	NA	-0.75656	1.14104e-09	Predicted exocyst component; ortholog of S. cerevisiae Sec5p; merged with orf19.75 in Assembly 21
orf19.2356	CR_07060C_A	CRZ2	NA	NA	-1.30456	1.1491e-09	C2H2 transcription factor; crz1 not crz2 null mutation suppresses fluconazole resistance of homozygous cka2 null; Rim101-repressed at pH 8; required for yeast cell adherence to silicone substrate; Spider biofilm induced
orf19.4913	C1_12830C_A		DUF1	NA	-0.863554	1.14994e-09	Protein of unknown function
orf19.2256	C2_07000W_A		YCR051W	NA	0.910775	1.32911e-09	Protein of unknown function
orf19.3074	C4_07250C_A	TLO10	NA	NA	-0.749678	1.34332e-09	Member of a family of telomere-proximal genes of unknown function
orf19.6899	C7_01170C_A		NA	NA	-1.35001	1.35833e-09	Putative oxidoreductase; mutation confers hypersensitivity to toxic ergosterol analog; rat catheter and Spider biofilm induced
orf19.6160	C3_00850C_A		EIS1	NA	-1.11088	1.39262e-09	Protein of unknown function
orf19.4273	C5_02590C_A		SLS1	NA	2.42291	1.52799e-09	Putative mitochondrial membrane protein; ortholog of S. cerevisiae Sls1; coordinates expression of mitochondrially-encoded genes; Hap43-induced
orf19.868	C2_03520C_A	ADAEC	NA	NA	-1.24753	1.53099e-09	Protein of unknown function; transcription is specific to white cell type
orf19.1914	C2_00080C_A	FAV3	NA	NA	1.16663	1.55665e-09	Putative alpha-1,6-mannanase; induced by mating factor in MTLa/MTLa opaque cells
orf19.5742	C6_03710W_A	ALS9	FLO1	NA	-1.21746	1.59956e-09	ALS family cell-surface glycoprotein; expressed during infection of human epithelial cells; confers laminin adhesion to S. cerevisiae; highly variable; putative GPI-anchor; Hap43-repressed
orf19.1306	C4_03720C_A		NA	NA	-1.5374	1.65455e-09	Protein of unknown function
orf19.5662	C4_00350W_A	PEP7	PEP7	NA	0.699141	1.7894e-09	Vesicle transport protein; acts in endosomal transport; roles in metal ion resistance, virulence, adhesion, hyphal growth, chlamydospore formation; similar to S. cerevisiae Pep7p
orf19.6041	C1_00640C_A	RPO41	RPO41	NA	0.779517	1.8083e-09	Putative mitochondrial RNA polymerase; repressed in core stress response; Spider biofilm induced
orf19.1830	C1_10580C_A		NA	NA	0.960969	1.86203e-09	Protein of unknown function; Hap43-induced; rat catheter and Spider biofilm induced
orf19.2008	C2_01160W_A		MRI1	NA	0.794217	1.87589e-09	Protein of unknown function
orf19.348	C3_03500W_A	SKN2	NA	NA	-1.02668	1.89597e-09	Protein with a potential role in beta-1,6 glucan biosynthesis; similarity to Kre6 and Skn1; possibly essential, disruptants not obtained by UAU1 method; Hap43-induced; flow model biofilm induced; rat catheter biofilm repressed
orf19.1785	C2_09980W_A		NA	NA	-0.955929	1.90912e-09	Protein with a PI31 proteasome regulator domain; Hap43-repressed; flow model biofilm induced
orf19.1747	C2_10310C_A	KIP2	KIP2	NA	-1.63111	1.91888e-09	Putative kinesin-related motor protein involved in mitotic spindle positioning; repressed by alpha pheromone in SpiderM medium; periodic mRNA expression, peak at cell-cycle G2/M phase
orf19.7413	C3_06200C_A	MMS21	NA	NA	1.09642	1.91888e-09	Putative MMS21-SMC5-SMC6 complex component
orf19.1887	C2_07440C_A		YEH1	NA	-1.31048	1.96776e-09	Protein of unknown function
orf19.2983	C1_02920W_A	CDC73	CDC73	NA	-0.56282	2.06198e-09	Putative transcription elongation factor; cdc73 kap114 double transposon mutation affects filamentous growth; Spider biofilm repressed
orf19.5392	C3_00650W_A	NGT1	NA	NA	1.14831	2.07106e-09	N-acetylglucosamine (GlcNAc)-specific transporter; role in GlcNAc (but not serum) induced hyphal growth; localizes to plasma membrane; induced by GlcNAc, macrophage engulfment; 12 transmembrane, major facilitator superfamily
orf19.4190	C4_00520W_A	PAM18	PAM18	NA	1.25953	2.19136e-09	Predicted component of the presequence translocase-associated import motor (PAM complex) involved in protein import into mitochondrial matrix; rat catheter biofilm induced
orf19.7088	C7_00330C_A		SUA5	NA	1.32829	2.31966e-09	Protein of unknown function
orf19.6136	CR_07320C_A		MRPL4	NA	1.20552	2.32812e-09	Ortholog of S. cerevisiae Mrpl4, a mitochondrial ribosomal protein of the large subunit; repressed by nitric oxide
orf19.4270	C5_02570W_A	MNN13	NA	NA	0.950327	2.34565e-09	Predicted alpha-1,3-mannosyltransferase activity with a role in protein glycosylation; regulated by Sef1p-, Sfu1p-, and Hap43p
orf19.3040	C1_03390W_A	EHT1	EHT1	NA	-1.19612	2.49695e-09	Putative acyl-coenzymeA:ethanol O-acyltransferase; regulated by Sef1, Sfu1, and Hap43; induced by alpha pheromone in SpiderM medium; Spider biofilm induced; promoter bound by Ndt80
orf19.5158	C7_03030W_A		NA	NA	-0.990086	2.49695e-09	Protein with similarity to a human gene associated with colon cancer and to orf19.5158; regulated by Gcn4, Cyr1; induced by amino acid starvation; macrophage-induced protein, macrophage-repressed; Spider biofilm induced
orf19.6737	C3_07540C_A		NA	NA	-0.606334	2.49695e-09	Protein of unknown function; mutants are viable; induced in a cyr1, ras1, or efg1 homozygous null
orf19.742	C4_05130C_A	ALD6	NA	NA	2.12174	2.49695e-09	Putative aldehyde dehydrogenase; stationary phase enriched protein; expression regulated upon white-opaque switch; rat catheter biofilm induced; rat catheter and Spider biofilm induced
orf19.1598	C2_09400C_A	ERG24	NA	NA	-1.4757	2.58452e-09	C-14 sterol reductase, has a role in ergosterol biosynthesis; mutation confers increased sensitivity to dyclonine; rat catheter and Spider biofilm repressed
orf19.5862	C3_04200W_A	AFP99	NA	NA	1.74093	2.63689e-09	Protein related to arginases; downregulated upon adherence to polystyrene; regulated by Gcn2p and Gcn4p
orf19.3851	CR_06020W_A		NA	NA	1.22756	2.66141e-09	Protein of unknown function; induced by alpha pheromone in SpiderM medium
orf19.1341	C7_03340C_A	PRR2	NA	NA	-1.2088	2.68656e-09	Putative serine/threonine protein kinase; mutation confers resistance to 5-fluorocytosine (5-FC)
orf19.5848	CR_05540C_A		NA	NA	1.06092	2.73866e-09	RING-type zinc finger protein; upregulated during oral infection; mutants have reduced ability to damage oral epithelial cells; Spider and flow model biofilm induced
orf19.3053	C1_03510C_A		NA	NA	-0.91738	2.75154e-09	Protein of unknown function; present in exponential and stationary phase yeast; identified in extracts from biofilm and planktonic cells; flow model biofilm induced gene; GlcNAc-induced protein
orf19.5636	C4_00130W_A	RBT5	NA	NA	-4.56127	3.00315e-09	GPI-linked cell wall protein; hemoglobin utilization; Rfg1, Rim101, Tbf1, Fe regulated; Sfu1, Hog1, Tup1, serum, alkaline pH, antifungal drugs, geldamycin repressed; Hap43 induced; required for RPMI biofilms; Spider biofilm induced
orf19.493	CR_04100C_A	RPL15A	RPL15B	NA	-0.760152	3.17378e-09	Putative ribosomal protein; repressed upon phagocytosis by murine macrophage; positively regulated by Tbf1; Spider biofilm repressed
orf19.2557	CR_01660C_A	SEC65	SEC65	NA	-0.832291	3.17834e-09	Component of the protein-targeting Signal Recognition Particle (SRP); similar to mammalian Srp19; functional homolog of S. cerevisiae Sec65; Tbf1-induced
orf19.4961	C1_13350W_A	STP2	STP2	NA	-1.00828	3.17834e-09	Amino-acid-regulated transcription factor; activates transcription of amino acid permease genes; activated by amino-acid-induced proteolytic processing (Ssy1, Csh3 dependent); required for alkalinization of medium; Spider biofilm induced
orf19.3300	C1_01110C_A	ZPR1	ZPR1	NA	-0.985116	3.17906e-09	Protein with putative zinc finger; regulated by Gcn4p; repressed in response to amino acid starvation (3-aminotriazole treatment); upregulation correlates with clinical development of fluconazole resistance
orf19.6814	C3_06870W_A	TDH3	TDH3	NA	-0.913192	3.31887e-09	NAD-linked glyceraldehyde-3-phosphate dehydrogenase; binds fibronectin, laminin; at cell surface; antigenic in infection; farnesol-repressed; stationary phase-enriched; GlcNAc-induced; flow model biofilm induced; Spider biofilm repressed
orf19.1780	C2_10020C_A		NA	NA	2.40007	3.46202e-09	Protein of unknown function
orf19.1960	C5_01100C_A	CLN3	CLN3	NA	1.24186	3.4724e-09	G1 cyclin; depletion abolishes budding and causes hyphal growth defects; farnesol regulated, functional in S. cerevisiae; possibly essential (UAU1 method); other biofilm induced; Spider biofilm induced
orf19.7494	CR_00390W_A	MMS22	NA	NA	1.0482	3.52857e-09	Protein of unknown function; cell-cycle regulated periodic mRNA expression
orf19.7376	C3_05950W_A		NA	NA	0.98515	3.55529e-09	Protein of unknown function
orf19.4048	C5_05480W_A	DES1	NA	NA	-0.687647	3.62559e-09	Putative delta-4 sphingolipid desaturase; planktonic growth-induced gene
orf19.2624	CR_07540C_A		NA	NA	2.16476	4.05864e-09	Protein of unknown function; downregulated by fluphenazine treatment or in an azole-resistant strain that overexpresses CDR1 and CDR2
orf19.1162	C1_11580W_A		NA	NA	-0.957127	4.20274e-09	Protein of unknown function; transcript upregulated by benomyl treatment
orf19.4618	C4_01750C_A	FBA1	NA	NA	-0.852333	4.20274e-09	Fructose-bisphosphate aldolase; glycolytic enzyme; antigenic in murine/human infection; regulated by yeast-hypha switch; induced by Efg1, Gcn4, Hog1, fluconazole; phagocytosis-repressed; flow model biofilm induced; Spider biofilm repressed
orf19.7227	C1_14190C_A		YPI1	NA	-1.12147	4.25367e-09	Protein phosphatase inhibitor; Hap43-repressed; homozygous Tn insertion decreases colony wrinkling but does not block hyphal growth in liquid media; mutation confers hypersensitivity to toxic ergosterol analog; Spider biofilm induced
orf19.5785	C2_03110W_A		NA	NA	-1.72198	4.68435e-09	Protein of unknown function; upregulated in a cyr1 or ras1 null mutant; induced by nitric oxide
orf19.7149	C7_04240C_A		ROY1	NA	-1.19026	4.70033e-09	Putative GTPase inhibitor; predicted role in endocytosis, protein targeting to vacuole; rat catheter biofilm repressed
orf19.1225	C2_06690C_A	PEX22	NA	NA	-0.792978	4.73216e-09	Putative peroxin
orf19.2165	C2_08200W_A		NA	NA	-1.36626	4.80083e-09	Predicted hydrolase; induced by nitric oxide
orf19.5268	C1_11980W_A	MED10	NUT2	NA	0.884574	4.80083e-09	RNA polymerase II mediator complex subunit; possibly an essential gene, disruptants not obtained by UAU1 method
orf19.5041	C4_03860C_A		NA	NA	0.883305	5.20927e-09	Protein of unknown function
orf19.90	C6_00890W_A		NA	NA	-1.13791	5.20927e-09	Protein of unknown function
orf19.3852	CR_06030C_A		NA	NA	1.18344	5.32226e-09	Protein of unknown function
orf19.1799	C4_05430C_A	GAP5	NA	NA	-0.714389	5.32645e-09	Putative general amino acid permease; fungal-specific (no human or murine homolog)
orf19.4787	C1_09280W_A		JJJ2	NA	1.07562	5.37658e-09	Protein of unknown function
orf19.1901	C2_07350W_A	MCM3	MCM3	NA	-0.932587	6.02347e-09	Putative DNA replication protein; periodic mRNA expression, peak at cell-cycle M/G1 phase; Spider biofilm induced
orf19.1257	C4_05720W_A		NA	NA	-1.75002	6.07726e-09	Protein of unknown function
orf19.467	CR_03890W_A	WOR3	NA	NA	1.7754	6.07726e-09	Transcription factor; modulator of white-opaque switch; induced in opaque cells; promoter bound by Wor1; overexpression at 25 degr shifts cells to opaque state; deletion stabilizes opaque cells at higher temperatures; Spider biofilm induced
orf19.2819	CR_02600W_A		NA	NA	1.87968	6.3617e-09	Protein of unknown function
orf19.5045	C4_03890W_A	PTP2	PTP2	NA	-0.898341	6.52865e-09	Predicted protein tyrosine phosphatase; involved in regulation of MAP kinase Hog1 activity; induced by Mnl1 under weak acid stress; rat catheter and Spider biofilm induced
orf19.7141	C7_04270C_A	UFE1	UFE1	NA	-1.08118	6.5327e-09	Protein interacting with Sec20p, possibly involved in retrograde transport between the Golgi and the endoplasmic reticulum; functional homolog of S. cerevisiae Ufe1p, which is an ER t-SNARE that mediates the retrograde traffic
orf19.1681	C3_01620W_A		NA	NA	-0.927905	6.53391e-09	Protein of unknown function
orf19.438	C1_05280W_A		YHR078W	NA	-0.745234	6.55081e-09	Protein of unknown function
orf19.223	C2_08860W_A		FPK1	NA	-0.77585	6.55903e-09	Putative serine/threonine protein kinase; Hap43-repressed; induced by prostaglandins; possibly an essential gene, disruptants not obtained by UAU1 method; flow model biofilm induced; Spider biofilm induced
orf19.3422	C6_01650C_A	FMP27	FMP27	NA	-1.11509	6.56482e-09	Putative mitochondrial protein; mRNA binds She3
orf19.5130	C7_03250C_A	PDI1	PDI1	NA	0.667179	6.65927e-09	Putative protein disulfide-isomerase; antigenic in human infection; soluble protein in hyphae; induced by filamentous growth; protein present in exponential and stationary growth phase yeast cultures; flow model biofilm repressed
orf19.5775	C6_03990C_A		NA	NA	1.05759	6.65927e-09	Predicted ORF overlapping the Major Repeat Sequence on chromosome 6; member of a family encoded by FGR6-related genes in the RB2 repeat sequence; rat catheter biofilm repressed
orf19.4106	C2_06120C_A		YJR141W	NA	1.26675	6.66396e-09	Protein of unknown function
orf19.3031	C1_03340C_A	SEC62	SEC62	NA	0.830989	6.73813e-09	Putative endoplasmic reticulum (ER) protein-translocation complex subunit
orf19.474	CR_03930C_A		BRL1	NA	0.695019	6.73813e-09	Protein of unknown function
orf19.211	C2_08950W_A		NA	NA	-1.01621	6.88148e-09	Predicted homeodomain-like transcription factor; also has a metal-binding Ada DNA repair protein domain; Spider biofilm induced
orf19.2520	CR_01370C_A		MRPS28	NA	1.00584	6.88286e-09	Protein of unknown function
orf19.4187	C4_00560C_A	MMM1	MMM1	NA	0.713563	7.00653e-09	Protein of unknown function
orf19.3939	C5_04550W_A		EMC2	NA	-0.726162	7.02302e-09	Protein of unknown function
orf19.7323	CR_09270C_A	CBP1	NA	NA	-1.10811	7.08074e-09	Corticosteroid binding protein; transcription induced at late log-phase or upon adherence to polystyrene; not induced by corticosterone; contains a possible NAD/FAD binding region; regulated by Nrg1, Tup1; Spider biofilm induced
orf19.6583	C7_01460C_A		NA	NA	1.02201	7.34713e-09	Protein of unknown function; induced by alpha pheromone in SpiderM medium
orf19.5523	C6_02540C_A		NA	NA	-1.4607	7.40028e-09	Protein of unknown function
orf19.5611	C6_03240W_A		GRE2	NA	1.65231	7.42879e-09	Predicted 3-methylbutanol:NAD(P) oxidoreductase and methylglyoxal reductase (NADPH-dependent); role in ergosterol metabolic process; early stage flow model biofilm induced; Spider biofilm induced
orf19.3139	C4_06710W_A		NA	YML131W	-0.89521	7.58404e-09	Putative NADP-dependent oxidoreductase; Hap43-repressed; induced by benomyl treatment; oxidative stress-induced via Cap1; rat catheter biofilm repressed
orf19.1981	C5_00860W_A	IMP2	IMP2	NA	-0.655255	7.81379e-09	Predicted subunit of the mitochondrial inner membrane peptidase complex involved in protein targeting to mitochondria
orf19.1835	C1_10640C_A	PEA2	PEA2	NA	0.714052	8.43824e-09	Putative coiled-coil polarisome; predicted role in polarized morphogenesis, cell fusion, and low affinity Ca2+ influx; rat catheter biofilm induced
orf19.2407	CR_03170W_A	DPS1-1	DPS1	NA	-0.792942	8.8597e-09	Putative tRNA-Asp synthetase; genes encoding ribosomal subunits, translation factors, tRNA synthetases are downregulated upon phagocytosis by murine macrophage; protein enriched in stationary phase yeast cultures
orf19.3050	C1_03480C_A	AGE1	AGE1	NA	-0.720248	9.95471e-09	Putative GTPase activator; induced in low iron; rat catheter biofilm repressed
orf19.3352	C1_01620C_A		NA	NA	-1.37206	9.95954e-09	Protein of unknown function
orf19.342	C3_03450C_A	BMT7	NA	NA	1.2732	1.00329e-08	Beta-mannosyltransferase, member of a 9-gene family that includes characterized genes BMT1, BMT2, BMT3, and BMT4 with roles in beta-1,2-mannosylation of cell wall phosphopeptidomannan; downregulated in azole-resistant strain; Hap43p-induced
orf19.1525	C2_02090W_A		NMD4	NA	0.697694	1.00574e-08	Protein of unknown function
orf19.3239	CR_01150C_A	CTF18	CTF18	NA	0.881518	1.02955e-08	Protein with a predicted role in sister chromatid cohesion; cell-cycle regulated periodic mRNA expression
orf19.5237	C1_12260W_A	VPH2	VPH2	NA	-1.29254	1.02955e-08	Protein of unknown function
orf19.6581	C7_01480W_A		PFA4	NA	0.604139	1.04828e-08	Protein of unknown function
orf19.209	C2_08970C_A	DFG10	DFG10	NA	1.50888	1.06032e-08	Protein of unknown function
orf19.5976	C3_05060W_A		NA	NA	1.03031	1.07583e-08	Protein of unknown function; ortholog of S. cerevisiae Urn1; downregulated by fluphenazine treatment, in azole-resistant strains that overexpress CDR1 and CDR2 or MDR1
orf19.1631	C3_02150C_A	ERG6	ERG6	NA	-1.59897	1.082e-08	Delta(24)-sterol C-methyltransferase, converts zymosterol to fecosterol, ergosterol biosynthesis; mutation confers nystatin resistance; Hap43, GlcNAc-, fluconazole-induced; upregulated in azole-resistant strain; Spider biofilm repressed
orf19.4831	C1_09680W_A	MTS1	NA	NA	0.489923	1.11966e-08	Sphingolipid C9-methyltransferase; catalyzes methylation of the 9th carbon in the long chain base component of glucosylceramides; glucosylceramide biosynthesis is important for virulence; Spider biofilm repressed
orf19.5879	C3_04350C_A		NA	NA	1.32506	1.15624e-08	Protein of unknown function
orf19.5216	C2_05960C_A		NA	NA	1.5512	1.18445e-08	Protein of unknown function
orf19.1378	C2_09720W_A	SUP35	SUP35	NA	-0.558895	1.25999e-08	Translation factor eRF3; shows prion-like aggregation in some, not all, studies; partially complements S. cerevisiae sup35 mutant translation defect; species barrier with S. cerevisiae Sup35p prion; gene not regulated by yeast-hyphal switch
orf19.6533	C7_01870W_A	MSK1	MSK1	NA	0.91151	1.28349e-08	Putative mitochondrial lysine-tRNA synthetase; flucytosine repressed
orf19.212	C2_08940C_A	VPS28	VPS28	NA	-0.913567	1.29792e-08	ESCRT I protein sorting complex subunit; involved in Rim8 processing and proteolytic activation of Rim101, which regulates pH response; role in echinocandin, azole sensitivity
orf19.685.1	C6_01940W_A		NA	NA	0.986517	1.45243e-08	Protein of unknown function
orf19.7284	CR_08890C_A	ASR2	NA	NA	-1.85634	1.45726e-08	Adenylyl cyclase and stress responsive protein; induced in cyr1 or ras1 mutant; stationary phase enriched protein; Spider biofilm induced
orf19.4599	C4_01940W_A	PHO89	PHO89	NA	2.1729	1.45787e-08	Putative phosphate permease; transcript regulated upon white-opaque switch; alkaline induced by Rim101; possibly adherence-induced; F-12/CO2 model, rat catheter and Spider biofilm induced
orf19.5926	C3_04660C_A	ARG11	ORT1	NA	2.87136	1.45787e-08	Putative ornithine transporter of the mitochondrial inner membrane; induced during the mating process
orf19.1327	C4_03520C_A	RBT1	NA	NA	1.42757	1.45944e-08	Cell wall protein with similarity to Hwp1; required for virulence; predicted glycosylation; fluconazole, Tup1 repressed; farnesol, alpha factor, serum, hyphal and alkaline induced; Rfg1, Rim101-regulated
orf19.4960	C1_13330C_A		SPE4	NA	-0.844047	1.46207e-08	Protein of unknown function
orf19.1847	CR_06860C_A	ARO10	ARO10	NA	0.95455	1.52584e-08	Aromatic decarboxylase; Ehrlich fusel oil pathway of aromatic alcohol biosynthesis; alkaline repressed; protein abundance affected by URA3 expression in CAI-4 strain; Spider biofilm induced
orf19.1709	C3_01420C_A		NA	NA	-1.09168	1.53527e-08	Sterol carrier domain protein; alkaline downregulated; colony morphology-related gene regulation by Ssn6; Spider biofilm induced
orf19.1944	C5_01250W_A	GPR1	GPR1	NA	0.894002	1.56953e-08	Plasma membrane G-protein-coupled receptor of the cAMP-PKA pathway; required for WT hyphal growth; reports differ on role in cAMP-mediated glucose signaling; Gpr1 C terminus binds Gpa2; regulates HWP1 and ECE1; flow model biofilm induced
orf19.4707	C4_00850C_A		NA	NA	2.04055	1.61907e-08	Putative secreted acid sphingomyelin phosphodiesterase; possible Kex2p substrate
orf19.2703	C4_02920W_A		EAR1	NA	-0.789353	1.71877e-08	Specificity factor required for ubiquitination and sorting of specific cargo proteins at the multivesicular body; ortholog of S. cerevisiae Ear1; transcript regulated by iron; Ssr1-represssed; Spider biofilm induced
orf19.2059	C2_00690W_A		NA	NA	1.36077	1.72549e-08	Protein with homology to magnesium-dependent endonucleases and phosphatases; regulated by Sef1, Sfu1, and Hap43; Spider biofilm induced
orf19.823	C2_04000C_A		NA	NA	-1.55947	1.75495e-08	Protein of unknown function; Spider biofilm induced
orf19.6229	C1_06810W_A	CAT1	CTA1	NA	-2.33705	1.80507e-08	Catalase; resistance to oxidative stress, neutrophils, peroxide; role in virulence; regulated by iron, ciclopirox, fluconazole, carbon source, pH, Rim101, Ssn6, Hog1, Hap43, Sfu1, Sef1, farnesol, core stress response; Spider biofilm induced
orf19.2951	C1_02620C_A	HOM6	HOM6	NA	-0.549713	1.81481e-08	Putative homoserine dehydrogenase; Gcn4-regulated; induced by amino acid starvation (3-ATtreatment); macrophage-induced protein; protein level decreases in stationary phase cultures; flow model biofilm repressed
orf19.3202	C5_01730W_A		NA	NA	1.31004	1.84251e-08	Protein of unknown function
orf19.139	C6_01320W_A	TRA1	TRA1	NA	-0.919888	1.84369e-08	Subunit of the NuA4 histone acetyltransferase complex
orf19.2531	CR_01470W_A	CSP37	OM45	NA	-1.18603	1.91608e-08	Hyphal cell wall protein; role in progression of mouse systemic infection; predicted P-loop, divalent cation binding, N-glycosylation sites; expressed in yeast and hyphae; hyphal downregulated; stationary-phase enriched; GlcNAc-induced
orf19.4933	C1_13070C_A	FAD3	NA	NA	1.06205	1.91646e-08	Omega-3 fatty acid desaturase; production of alpha-linolenic acid, a major component of membranes; caspofungin induced; Plc1-regulated; colony morphology-related gene regulation by Ssn6; Spider biofilm induced, flow model biofilm repressed
orf19.7188	C7_03920C_A	RPP1B	RPP1B	NA	-0.836019	1.97853e-08	Conserved acidic ribosomal protein, likely involved in regulation of translation elongation; interacts with Rpp2A; 1 of 4 similar C. albicans ribosomal proteins (Rpp1A, Rpp1B, Rpp2A, Rpp2B); induced by Tbf1; Spider biofilm repressed
orf19.6661	C5_03520W_A		NA	NA	2.01706	2.07974e-08	Predicted ORF from Assembly 19; removed from Assembly 20; subsequently reinstated in Assembly 21 based on comparative genome analysis
orf19.1837	C1_10660W_A	TBP1	SPT15	NA	-0.786643	2.13301e-08	Transcription initiation factor; binds TATA box sequence, binding does not require TFIIA; caspofungin repressed; functional homolog of S. cerevisiae and human TATA-binding proteins; Spider biofilm induced
orf19.2326	C1_10910C_A		ESC2	NA	0.690696	2.13721e-08	Protein of unknown function
orf19.6402	CR_08340W_A	CYS3	CYS3	NA	1.26745	2.15606e-08	Cystathionine gamma-lyase; induced by alkaline, amphotericin B, cadmium stress, oxidative stress via Cap1; possibly adherence-induced; Hog1 regulated; reduced levels in stationary phase yeast cells; Spider and flow model biofilm induced
orf19.7516	CR_00190W_A	NGS1	NA	NA	0.687631	2.22866e-08	Putative glycoside hydrolase; Hap43-induced gene
orf19.2529	CR_01430W_A		GPI15	NA	-1.36645	2.23679e-08	Ortholog of S. cerevisiae Gpa15; involved in the synthesis of glycosylphosphatidylinositol (GPI) anchors; shuman Pig-H, which is also involved in GPI assembly; Spider biofilm induced
orf19.3337	C1_01510W_A		NA	NA	1.17655	2.28562e-08	Protein of unknown function; merged with orf19.3338; rat catheter, flow and Spider model biofilm induced; promoter bound by Bcr1, Efg1, Ndt80, and Rob1; orf19.3338 Bcr1-repressed in RPMI a/a biofilms
orf19.4895	C1_10250C_A		NA	NA	1.5184	2.2935e-08	Protein of unknown function
orf19.33	C2_06570C_A		NA	NA	-1.34919	2.3396e-08	Predicted ORF from Assembly 19; removed from Assembly 20; restored based on transcription data; similar to orf19.7550
orf19.5295	C4_04140W_A		NA	NA	1.37258	2.47999e-08	Protein with a predicted endonuclease/exonuclease/phosphatase family domain and a carbon catabolite repressor protein 4 domain; induced by alpha pheromone in SpiderM medium
orf19.5660.1	C4_00330C_A		TIM11	NA	0.955324	2.48826e-08	Protein of unknown function
orf19.1368	C2_09820W_A		NA	NA	-1.0364	2.66552e-08	Protein of unknown function; flow model biofilm induced; Spider biofilm induced
orf19.35.1	C2_06610C_A		NA	NA	-1.62912	2.71157e-08	Protein of unknown function
orf19.5541	C6_02690C_A		MRN1	NA	0.831801	2.72894e-08	Protein with similarity to S. pombe Nrd1p; transcription induced upon induction of hyphal growth; regulated by Cph1p, Efg1p, Cph2p; low-level expression; alkaline upregulated; fungal-specific (no human or murine homolog)
orf19.822	C2_04010C_A	HSP21	NA	NA	-1.3293	2.73548e-08	Small heat shock protein; role in stress response and virulence; fluconazole-downregulated; induced in cyr1 or ras1 mutant; stationary phase enriched protein; detected in some, not all, biofilm extracts; Spider biofilm induced
orf19.5536	C6_02660C_A		AMD2	NA	2.15972	2.95605e-08	Protein of unknown function
orf19.4683	C4_01060W_A	MLP1	MLP1	NA	-0.569226	2.98995e-08	Protein of unknown function
orf19.7490	CR_00420W_A		BSC6	NA	1.15996	3.02068e-08	Predicted membrane transporter; fucose:proton symporter family member, MFS superfamily; flow model biofilm induced
orf19.757	C1_04860W_A		YPR089W	NA	-0.630007	3.0462e-08	Protein of unknown function
orf19.2763	C4_02400C_A		MPS3	NA	-1.16906	3.32032e-08	Protein not essential for viability; orf19.10279 possibly transcriptionally regulated upon hyphal formation
orf19.7279.1	CR_08830W_A		NA	NA	-1.10156	3.44668e-08	Protein of unknown function; Spider biofilm induced
orf19.1861	C2_07640W_A		NA	NA	-1.24028	3.4721e-08	Protein of unknown function; flow model biofilm induced
orf19.1584	C2_02580W_A		NA	MCH4	0.84185	3.59555e-08	Predicted MFS membrane transporter; monocarboxylate porter family member; colony morphology-related gene regulation by Ssn6; flow model biofilm induced; Spider biofilm induced
orf19.5681	C5_00160W_A		NA	NA	1.07687	3.85982e-08	Protein of unknown function
orf19.5217	C2_05970C_A	TES1	NA	NA	0.729226	3.93524e-08	Putative acyl-CoA thioesterase
orf19.4833	C1_09690W_A	MLS1	MLS1	NA	-1.44487	3.9742e-08	Malate synthase; glyoxylate cycle enzyme; no mammalian homolog; regulated upon white-opaque switch; phagocytosis, strong oxidative stress induced; stationary phase enriched; flow model biofilm repressed; rat catheter, Spider biofilm induced
orf19.1600	C2_09420W_A		NA	NA	-1.08414	3.97794e-08	Protein of unknown function
orf19.4592	C4_02010C_A	HSX11	NA	NA	0.838951	3.99602e-08	UDP-glucose:ceramide glucosyltransferase (glucosylceramide synthase [GCS], EC 2.4.1.80); involved in glucosylceramide biosynthesis, which is important for virulence
orf19.5348	C2_10690W_A	TPS3	NA	NA	-1.03093	4.06118e-08	Predicted trehalose-phosphate synthase regulatory subunit; regulated by Efg1; regulated by Tsa1, Tsa1B under H2O2 stress conditions; flow model biofilm induced (reports differ)
orf19.2030	C2_00940W_A		NA	NA	1.38918	4.13381e-08	Plasma membrane-associated protein; induced in cyr1 or ras1 mutant; induced by hypoxia, ketoconazole and during growth in the mouse cecum; induced in oralpharyngeal candidasis; Spider biofilm induced
orf19.7010	C7_01040C_A		YIL001W	NA	1.00456	4.13381e-08	Protein of unknown function
orf19.4144	C5_01490C_A		MCP2	NA	0.833832	4.15732e-08	Predicted protein kinase; clade-associated gene expression
orf19.5924	C3_04640W_A	ZCF31	NA	NA	0.958662	4.16661e-08	Zn(II)2Cys6 transcription factor of unknown function; mutant is sensitive to copper and SDS, and resistant to Calcofluor White; required for yeast cell adherence to silicone substrate
orf19.6008.3	C1_00970W_A		NA	NA	1.69273	4.57857e-08	Protein of unknown function
orf19.1249	C4_05640C_A		HIS6	NA	0.886801	4.5901e-08	Protein of unknown function
orf19.6242	C1_06690W_A	CYK3	NA	CYK3	-1.47817	4.63907e-08	Essential protein involved in cytokinesis; contains an SH3 domain
orf19.6551	C7_01740C_A		GOS1	NA	-0.794869	4.86516e-08	Protein of unknown function
orf19.354	C3_03560W_A		ICP55	NA	0.764904	5.02882e-08	Protein of unknown function
orf19.2909	C4_06270C_A	ERG26	ERG26	NA	-1.17755	5.03433e-08	C-3 sterol dehydrogenase, catalyzes the 2nd of 3 steps required to remove 2 C-4 methyl groups from an intermediate in ergosterol biosynthesis; amphotericin B, caspofungin repressed; Spider biofilm repressed
orf19.4433	C1_07370C_A	CPH1	STE12	NA	0.961836	5.11308e-08	Transcription factor; for mating, filamentation on solid media, pheromone-stimulated biofilms; in pathway with Ess1, Czf1; required with Efg1 for host cytokine response; regulates galactose metabolism genes; rat cathether biofilm repressed
orf19.470	CR_03910C_A		TAF12	NA	0.724996	5.32429e-08	Protein of unknown function
orf19.1933	C5_01350W_A		PEX29	NA	0.736456	5.4657e-08	Protein of unknown function
orf19.7347	C3_05680W_A		UBC6	NA	-0.773731	5.50698e-08	Protein of unknown function
orf19.5463	C3_00110C_A	SEC6	SEC6	NA	-0.84796	5.55175e-08	Predicted subunit of the exocyst complex, involved in exocytosis; localizes to a crescent on the surface of the hyphal tip; Hap43p-repressed gene, overlaps orf19.5464 and orf19.5465
orf19.7383	C3_06020W_A	MNN9	MNN9	NA	0.544297	5.55175e-08	Protein of N-linked outer-chain mannan biosynthesis; mutant has defective cell wall; required for wild-type hyphal growth; mutant is hygromycin B sensitive and vanadate resistant; has N-terminal membrane-spanning segment (positions 18-34)
orf19.7272	C1_14550C_A		NA	NA	-0.899409	5.62334e-08	Protein of unknown function; transcript detected on high-resolution tiling arrays
orf19.1601	C2_09430W_A	RPL3	RPL3	NA	-0.714134	5.71494e-08	Ribosomal protein, large subunit; induced by ciclopirox olamine treatment; genes encoding cytoplasmic ribosomal subunits are downregulated upon phagocytosis by murine macrophages; Hap43-induced gene; Spider biofilm repressed
orf19.2547	CR_01600C_A		NA	NA	1.13849	5.75318e-08	Protein of unknown function
orf19.2886	C4_06480C_A	CEK1	FUS3	NA	0.654246	5.88701e-08	ERK-family protein kinase; required for wild-type yeast-hypha switch, mating efficiency, virulence in mice; Cst20-Hst7-Cek1-Cph1 MAPK pathway regulates mating, and invasive hyphal growth under some conditions; Spider biofilm induced
orf19.6244	C1_06670W_A		NA	NA	-1.17375	6.17491e-08	Protein of unknown function
orf19.2565	CR_01720W_A		MDM1	NA	0.894494	6.4483e-08	Predicted intermediate filament protein; required for nuclear and mitochondrial transmission to daughter buds in S. cerevisiae; Spider biofilm induced
orf19.458	CR_05970C_A		BCS1	NA	0.834175	6.4483e-08	Protein of unknown function
orf19.498	CR_04140W_A		NAM9	NA	0.911067	6.5219e-08	Putative mitochondrial ribosomal component of the small subunit; possibly an essential gene, disruptants not obtained by UAU1 method; Spider biofilm repressed
orf19.6117	CR_07480W_A		NA	NA	1.09534	6.55142e-08	S. pombe ortholog SPAC5D6.04 is a predicted auxin family transmembrane transporter; ketoconazole and hypoxia induced
orf19.5984	C3_05110W_A		DSC2	NA	-0.868721	6.57208e-08	Putative protein of unknown function; homozygous transposon insertion causes decreased colony wrinkling under filamentous growth-inducing conditions, but does not block true hyphal formation in liquid media
orf19.5788	C2_03100W_A	EFT2	EFT1	NA	-0.838616	6.83669e-08	Elongation Factor 2 (eEF2); GTPase; essential; highly expressed; target of sordarin antifungals; antigenic in human/mouse; lacks site for regulatory phosphorylation by eEF2 kinase; GCN-regulated; higher protein amount in stationary phase
orf19.1562	C2_02390W_A		NA	NA	-1.57178	6.85282e-08	Protein of unknown function; flow model biofilm induced; Spider biofilm induced; repressed by alpha pheromone in SpiderM medium
orf19.427	C1_05380C_A		RIF1	NA	0.771669	6.95293e-08	Protein of unknown function
orf19.568	C5_00700C_A	SPE2	SPE2	NA	1.0505	7.0062e-08	Putative S-adenosylmethionine decarboxylase; Hap43-induced gene; possibly adherence-induced; Spider biofilm induced
orf19.5167	C7_02940C_A	IFM1	IFM1	NA	0.779471	7.1318e-08	Putative mitochondrial translation initiation factor; transcript regulated by Nrg1, Mig1, and Tup1
orf19.3400	C6_01840C_A	COQ3	COQ3	NA	0.68849	7.19931e-08	Protein with a predicted role in coenzyme Q biosynthesis; transcriptionally induced by interaction with macrophages; possibly an essential gene, disruptants not obtained by UAU1 method
orf19.3038	C1_03380W_A	TPS2	TPS2	NA	-0.955859	7.20391e-08	Trehalose-6-phosphate (Tre6P) phosphatase; mutant heat sensitive, accumulates Tre6P, decreased mouse virulence; possible drug target; 2 conserved phospohydrolase motifs; no mammalian homolog; Hap43-repressed; flow model biofilm induced
orf19.1796	C4_05390W_A		NA	NA	-1.32342	7.31456e-08	Putative glyoxylate reductase; acts on glyoxylate and hydroxypyruvate substrates; Spider biofilm repressed
orf19.5837	C2_02700C_A		ABZ2	NA	-0.629452	7.50864e-08	Protein of unknown function
orf19.5352	C2_10720C_A		NA	NA	0.778594	7.72669e-08	Protein with a predicted magnesium transporter domain; mutants are viable
orf19.4498	C2_04520C_A		NA	NA	0.81929	7.83819e-08	Protein of unknown function
orf19.5069	C1_07980C_A		SAE3	NA	-1.37225	7.90687e-08	Ortholog of S. cerevisiae Sae3; meiosis specific protein involved in DMC1-dependent meiotic recombination in S. cerevisiae; Spider biofilm induced
orf19.834	C2_03910C_A		MNL1	NA	0.628644	7.90687e-08	Protein of unknown function
orf19.395	C1_08500C_A	ENO1	NA	NA	-0.809745	8.0026e-08	Enolase; glycolysis and gluconeogenesis; major cell-surface antigen; binds host plasmin/plasminogen; immunoprotective; Hap43, phagocytosis induced; farnesol-repressed; flow model biofilm induced; Spider biofilm repressed; may be essential
orf19.1481	C2_01700C_A	HAP42	NA	NA	-1.09437	8.03335e-08	Predicted transcription factor; possibly an essential gene, disruptants not obtained by UAU1 method
orf19.4510	C2_04420W_A	IFA4	NA	NA	1.19451	8.07126e-08	Protein of unknown function; oxidative stress-induced via Cap1
orf19.2484	C1_05670W_A		YDR415C	NA	-0.640651	8.18498e-08	Protein of unknown function
orf19.7676	CR_10840C_A	XYL2	SOR2	NA	-1.15928	8.60241e-08	D-xylulose reductase; immunogenic in mice; soluble protein in hyphae; induced by caspofungin, fluconazole, Hog1 and during cell wall regeneration; Mnl1-induced in weak acid stress; stationary phase enriched; flow model biofilm induced
orf19.6005	C3_05270C_A	HGT5	NA	SNF3	-0.870418	8.71671e-08	Putative glucose transporter of the major facilitator superfamily; the C. albicans glucose transporter family comprises 20 members; 12 probable membrane-spanning segments, extended N terminus; expressed in rich medium; Hap43p-repressed
orf19.5064	C1_07910C_A	MRPL3	MRPL3	NA	0.882133	8.89606e-08	Ribosomal protein of the large subunit, mitochondrial; repressed in core stress response; protein present in exponential and stationary growth phase yeast cultures
orf19.1504	C2_01920C_A		NA	TGL5	-0.820472	9.07272e-08	Putative patatin-like phospholipase; fungal-specific (no human or murine homolog)
orf19.6102	C1_00080C_A	RCA1	CST6	NA	-0.802497	9.1148e-08	Protein involved in regulation of carbonic anhydrases; controls CO2 sensing; bZIP domain-containing transcription factor of the ATF/CREB family; null mutant displays slow growth, abnormal colony morphology and invasive growth
orf19.3963	C5_04770W_A		FMP10	NA	-0.520527	9.32694e-08	Protein of unknown function
orf19.2090	C2_00410C_A		ECM16	NA	1.57242	9.94503e-08	Ortholog of S. cerevisiae Ecm16, an essential DEAH-box ATP-dependent RNA helicase specific to the U3 snoRNP required for 18S rRNA synthesis; Hap43-induced; Spider biofilm induced
orf19.5346	C2_10680W_A		TAF8	NA	-1.06066	1.00225e-07	Protein of unknown function
orf19.7310	CR_09140C_A		MSC1	NA	-1.71492	1.01324e-07	Protein with a role in directing meiotic recombination events to homologous chromatids; induced by ciclopirox olamine; positively regulated by Sfu1; Hog1, fluconazole-repressed; Hap43-induced; Spider biofilm induced
orf19.6973	C3_05360C_A		NA	PIM1	-0.883689	1.04651e-07	ATP-dependent LON protease family member; Hap43-repressed gene; regulated by Gcn2 and Gcn4; Spider biofilm induced
orf19.2545	CR_01580C_A	DOT6	DOT6	NA	0.828875	1.04743e-07	Protein with a predicted role in telomeric gene silencing and filamentation; repressed by high-level peroxide stress; Spider biofilm induced
orf19.2887	C4_06470W_A		YMR295C	NA	0.724823	1.06419e-07	Ortholog in S. cerevisiae is localizedto the bud, mating projection tip, and associates with ribosomes; Spider biofilm induced
orf19.5334	C2_10560C_A	ZSF1	TIS11	NA	-0.963932	1.0792e-07	Ortholog od S. cerevisiae Tis11, a mRNA-binding protein; transcription regulated by yeast-hyphal switch; flow model biofilm induced; Spider biofilm repressed
orf19.783	C1_04630C_A		NEO1	NA	0.879509	1.0792e-07	Protein of unknown function
orf19.3593	C2_08780W_A	RPT6	RPT6	NA	-0.627205	1.09415e-07	Putative ATPase of the 19S regulatory particle of the 26S proteasome; transcript regulated by Mig1; regulated by Gcn2 and Gcn4
orf19.4354	CR_03830C_A	MCM2	MCM2	NA	-0.787512	1.09415e-07	Phosphorylated protein of unknown function; transcription is periodic with a peak at M/G1 phase of the cell cycle
orf19.2149	C6_04550C_A		YPR003C	NA	0.833357	1.1304e-07	Putative sulfate permease; S. cerevisiae ortholog YPR003C localizes to the endoplasmic reticulum; regulated by Sef1p-, Sfu1p-, and Hap43p
orf19.3682	C1_02250W_A	CWH8	CAX4	NA	-2.1261	1.28658e-07	Putative dolichyl pyrophosphate (Dol-P-P) phosphatase; ketoconazole-induced; expression is increased in a fluconazole-resistant isolate; clade-associated gene expression; Hap43p-induced gene
orf19.17	C2_06370C_A	SCP1	SCP1	NA	1.37946	1.30817e-07	Putative cortical actin cytoskeleton protein; constitutive expression independent of MTL or white-opaque status
orf19.6984	C3_05460W_A		NA	AVT4	0.63339	1.32126e-07	Protein of unknown function
orf19.4907	C1_10360C_A		YCR061W	NA	-1.245	1.34304e-07	Putative protein of unknown function; Hap43p-repressed gene; increased transcription is observed upon fluphenazine treatment; possibly transcriptionally regulated by Tac1p; induced by nitric oxide; fungal-specific (no human/murine homolog
orf19.828	C2_03950W_A		MRPL24	NA	1.05398	1.34304e-07	Putative ribosomal protein, large subunit, mitochondrial precursor; repressed by prostaglandins; Spider biofilm repressed
orf19.5178	C7_02840C_A	ERG5	ERG5	NA	-1.28019	1.37106e-07	Putative C-22 sterol desaturase; fungal C-22 sterol desaturases are cytochrome P450 enzymes of ergosterol biosynthesis, catalyze formation of the C-22(23) double bond in the sterol side chain; transposon mutation affects filamentous growth
orf19.6478	C7_02330W_A	YCF1	YCF1	NA	-0.890746	1.37125e-07	Putative glutathione S-conjugate transporter; MRP/CFTR-subfamily, ABC type transporter; human neutrophil-induced; oxidative stress-induced via Cap1; possible association with multidrug resistance; possibly essential; Spider biofilm induced
orf19.7386	C3_06050C_A		MBA1	NA	1.45121	1.37585e-07	Protein of unknown function
orf19.48	C1_04950C_A	RPM2	RPM2	NA	-0.693154	1.3872e-07	Mitochondrial RNase P subunit; roles in nuclear transcription, cytoplasmic and mitochondrial RNA processing, mitochondrial translation; virulence-group-correlated expression; likely essential (UAU1 method); rat catheter biofilm induced
orf19.5925	C3_04650W_A		AIM6	NA	0.91831	1.40186e-07	Protein of unknown function
orf19.3733	CR_02360W_A	IDP2	IDP2	NA	-1.55432	1.4531e-07	Isocitrate dehydrogenase; white-opaque switch regulated; morphology-regulation by Ssn6; protein in exponential and stationary phase yeast; Hap43-repressed; Spider biofilm repressed by Bcr1, Tec1, Ndt80, Rob1, Brg1; Spider biofilm induced
orf19.6653	CR_05620C_A	MTG2	MTG2	NA	0.919073	1.45995e-07	Putative Obg family GTPase member; peripheral protein of the mitochondrial inner membrane; associates with the large ribosomal subunit; required for mitochondrial translation; rat catheter biofilm repressed
orf19.6469	C7_02420C_A		NA	NA	-1.01775	1.53339e-07	Predicted ORF in retrotransposon Tca11 with similarity to the Gag-Pol region of retrotransposons, which encodes nucleocapsid-like protein, reverse transcriptase, protease, and integrase
orf19.6606	CR_09560C_A		NA	NA	0.787978	1.53927e-07	Protein of unknown function
orf19.4012	C5_05190W_A	PCL5	PCL5	NA	-0.773418	1.54617e-07	Putative cyclin for Pho85 kinase; Gcn4-induced; suppresses toxicity of C. albicans Gcn4 overproduction in S. cerevisiae via increased Pho85-dependent phosphorylation and degradation of Gcn4; rat catheter and Spider biofilm induced
orf19.767	C1_04770C_A	ERG3	ERG3	NA	-0.966947	1.58645e-07	C-5 sterol desaturase; introduces C-5(6) double bond into episterol; some clinical isolates show increased azole resistance and defects in hyphal growth and virulence; Efg1p-repressed; fluconazole-induced
orf19.2757	C4_02450W_A		NA	NA	-1.13193	1.64369e-07	Protein of unknown function
orf19.7492	CR_00400C_A	SWC4	SWC4	NA	0.5646	1.70231e-07	Subunit of the NuA4 histone acetyltransferase complex
orf19.7463	CR_00660W_A		RRT12	NA	1.8774	1.72983e-07	Protein of unknown function
orf19.376	C4_00080C_A		NA	NA	0.974417	1.76016e-07	Protein of unknown function; Hap43-repressed; Spider biofilm induced
orf19.1934	C5_01340W_A	HST3	HST3	NA	-0.956463	1.80729e-07	Histone H3K56 deacetylase; reduced copy number increases opaque cell formation; repressed by MMS, hydroxyurea and high-levels of hydrogen peroxide; Hap43p-induced; ectopic expression blocks genotoxin-induced switching; nicotinamide target
orf19.3445	C6_01390W_A	HOC1	HOC1	NA	-0.636484	1.80729e-07	Protein with similarity to mannosyltransferases; similar to S. cerevisiae Hoc1p and C. albicans Och1p
orf19.3838	C4_04480C_A	EFB1	EFB1	NA	-0.591535	1.81853e-07	Translation elongation factor EF-1 beta; repressed by human whole blood or PMNs; macrophage/pseudohyphal-induced; antigenic in mouse; farnesol-downregulated; snoRNA snR18 is encoded within the EFB1 intron; Spider biofilm repressed
orf19.3951	C5_04660C_A	TIP1	YIP1	NA	-1.21345	1.91399e-07	Protein with a predicted role in biogenesis of ER-derived COPII transport vesicles; mutation confers hypersensitivity to toxic ergosterol analog
orf19.866	C2_03540W_A	RAD32	NA	NA	-1.18244	1.94526e-07	Protein similar to S. cerevisiae protein with role in nucleotide excision repair; down-regulation associated with azole resistance; Hap43p-repressed gene
orf19.4980	C1_13480W_A	HSP70	SSA4	NA	-1.09778	1.95612e-07	Putative hsp70 chaperone; role in entry into host cells; heat-shock, amphotericin B, cadmium, ketoconazole-induced; surface localized in yeast and hyphae; antigenic in host; farnesol-downregulated in biofilm; Spider biofilm induced
orf19.2923	C4_06140C_A		NA	NA	0.864401	1.98829e-07	Predicted membrane transporter, member of the drug:proton antiporter (14 spanner) (DHA2) family, MFS superfamily; induced by alpha pheromone in SpiderM medium
orf19.4675	C4_01150W_A	ASK1	NA	NA	-0.632333	2.04926e-07	Essential subunit of the Dam1 (DASH) complex, which acts in chromosome segregation by coupling kinetochores to spindle microtubules
orf19.4195.1	C6_00620W_A	FCA1	FCY1	NA	-1.69045	2.10298e-07	Cytosine deaminase; enzyme of pyrimidine salvage; functional homolog of S. cerevisiae Fcy1p; mutation is associated with resistance to flucytosine (5-FC) in a clinical isolate; hyphal downregulated; gene has intron
ITS1	CR_08780W_A	ITS1	NA	NA	-1.04478	2.19353e-07	Non-coding region in the 55 copies of rDNA repeat, between RDN18 and RDN58; in S. cerevisiae it is transcribed as part of the 35S precursor that is processed during rRNA maturation to yield 18S, 5.8S, and 25S rRNA species
orf19.2021	C2_01010W_A	HGT8	NA	NA	-1.1945	2.23154e-07	High-affinity glucose transporter of the major facilitator superfamily; 20 members in the C. albicans glucose transporter family; 12 probable membrane-spanning segments; gene has intron; expressed in rich medium; flow model biofilm induced
orf19.7357	C3_05760W_A		CAB2	NA	-0.80362	2.27185e-07	Protein of unknown function
orf19.5780	C2_03150C_A		YIL067C	NA	0.723809	2.29352e-07	Putative protein of unknown function; Hap43p-repressed gene
orf19.6134	CR_07350W_A		SEC39	NA	-0.777883	2.29352e-07	Protein of unknown function
orf19.5940	C3_04770C_A	ZCF32	NA	NA	1.2425	2.30842e-07	Predicted Zn(II)2Cys6 transcription factor; possibly an essential gene, disruptants not obtained by UAU1 method; Hap43-repressed
orf19.1287	C5_04030W_A		NA	NA	1.75516	2.36344e-07	Protein of unknown function; flow model biofilm induced; Spider biofilm induced
orf19.1769	C2_10120W_A		PLP2	NA	-1.38717	2.44949e-07	Protein of unknown function
orf19.4478	C1_04030W_A		MSD1	NA	1.06924	2.47287e-07	Protein of unknown function
orf19.6375	CR_08150W_A	RPS20	RPS20	NA	-0.86363	2.49342e-07	Putative ribosomal protein; repressed upon phagocytosis by murine macrophage; transcript positively regulated by Tbf1; Spider biofilm repressed
orf19.1237	C4_05560C_A	ARO9	ARO9	NA	1.01973	2.50972e-07	Aromatic transaminase; Ehrlich fusel oil pathway of aromatic alcohol biosynthesis; Rim101-dependent pH-regulation (alkaline induced); Hap43-induced gene
orf19.2496	C3_00930W_A	ATO2	NA	NA	-1.61409	2.5281e-07	Putative fungal-specific transmembrane protein; fluconazole repressed, Hap43-repressed; flow model biofilm induced; Spider biofilm induced
orf19.5076.1	C1_08040W_A		NA	NA	-2.01906	2.57773e-07	Protein of unknown function
orf19.6754	C3_07370W_A		NA	NA	-0.897276	2.60764e-07	Protein of unknown function; Spider biofilm induced
orf19.2108	C2_00240C_A	SOD6	NA	NA	-1.21883	2.6151e-07	Copper- and zinc-containing superoxide dismutase; gene family includes SOD1, SOD4, SOD5, and SOD6; gene may contain an intron; Hap43-repressed; flow model and rat catheter biofilm induced
orf19.3446	C6_01380C_A		NA	NA	-1.39892	2.70667e-07	Protein of unknown function
orf19.7280	CR_08850W_A		NA	NA	-1.10628	2.95418e-07	Protein of unknown function
orf19.4936.1	C1_13100W_A		NA	NA	1.90708	2.96406e-07	Putative adhesin-like protein; Spider biofilm induced
orf19.2467	C1_05840W_A	PRN1	NA	NA	-1.00636	2.96486e-07	Protein with similarity to pirins; induced by benomyl and in response to alpha pheromone in SpiderM medium; transcript induced by Mnl1 in weak acid stress; rat catheter and Spider biofilm induced
orf19.1980	C5_00870C_A	GIT4	NA	GIT1	1.89917	3.00494e-07	Glycerophosphocholine transporter; fungal-specific (no human or murine homolog); possibly an essential gene, disruptants not obtained by UAU1 method; Hap43p-repressed gene
orf19.2387	CR_03350C_A		ATP25	NA	0.788435	3.03826e-07	Putative tRNA-Pro synthetase; genes encoding ribosomal subunits, translation factors, and tRNA synthetases are downregulated upon phagocytosis by murine macrophage
orf19.2478.1	C1_05720W_A		RPL7A	NA	-0.658992	3.06403e-07	60S ribosomal protein L7; snoRNA snR39b encoded within the 2nd intron
orf19.2560	CR_01690C_A	CDC60	CDC60	NA	-0.762665	3.07018e-07	Cytosolic leucyl tRNA synthetase; conserved amino acid and ATP binding class I signature, tRNA binding, proofreading motifs; likely essential for growth; interacts with benzoxaborole antifungals; present in exponential and stationary phase
orf19.7043.1	C7_00750W_A	ACB1	ACB1	NA	-1.71082	3.11978e-07	Protein similar to a region of acyl-coenzyme-A-binding protein; amphotericin B repressed; regulated by Nrg1, Tup1; Hap43-induced
orf19.2412	CR_03130W_A		VPS55	NA	-0.621652	3.20777e-07	Protein of unknown function
orf19.5168	C7_02930C_A		TSR4	NA	0.938309	3.2141e-07	Protein of unknown function
orf19.3324	C1_01350C_A	TIF	TIF2	NA	-0.659679	3.23397e-07	Translation initiation factor; upregulated in highly virulent strain compared to less virulent strain; antigenic in human; flucytosine induced; downregulated upon phagocytosis by macrophages; Spider biofilm repressed
orf19.3908	C5_04250W_A	MRV8	NA	NA	1.26931	3.31237e-07	Protein of unknown function; Spider biofilm induced
orf19.1027	C1_03820W_A	PDR16	PDR16	NA	-0.851034	3.34565e-07	Phosphatidylinositol transfer protein; induction correlates with CDR1, CDR2 overexpression/azole resistance; fluphenazine, 17-beta-estradiol, ethynyl estradiol, NO induced; farnesol-downregulated in biofilm; rat catheter biofilm induced
orf19.1482	C2_01710W_A	HSK3	NA	NA	-0.944952	3.3727e-07	Subunit of the Dam1 (DASH) complex, which acts in chromosome segregation by coupling kinetochores to spindle microtubules; expression regulated during planktonic growth
orf19.2104	C2_00290W_A		JAC1	NA	-1.08602	3.3727e-07	Protein of unknown function
orf19.3135	C4_06740C_A		UBX2	NA	-0.641751	3.3727e-07	Protein of unknown function
orf19.2964	C1_02750C_A		RSC2	NA	-0.790764	3.38691e-07	Protein of unknown function
orf19.4897	C1_10270C_A	SFH5	SFH5	NA	-0.700626	3.4856e-07	Putative phosphatidylinositol transporter; rat catheter and Spider biofilm repressed
orf19.2962	C1_02730W_A		NA	NA	1.05715	3.67731e-07	Protein of unknown function; Spider biofilm induced
orf19.5089	C1_08130C_A	TERT	EST2	NA	0.649584	3.67731e-07	Telomerase reverse transcriptase; catalytic protein subunit of telomere synthesis; essential for telomerase activity; has telomerase-specific motif T and other conserved reverse transcriptase motifs
orf19.1966	C5_01060C_A	BUD23	BUD23	NA	1.36948	3.68943e-07	Putative methyltransferase; Hap43-induced; repressed by prostaglandins
orf19.4010	C5_05170W_A	PAN3	PAN3	NA	-0.476981	3.74689e-07	Protein of unknown function
orf19.680	C1_11220C_A	TIM50	TIM50	NA	0.819195	3.79989e-07	Predicted component of the Translocase of the Inner Mitochondrial membrane (TIM23 complex); involved in mitochondrial protein import; Spider biofilm repressed
orf19.3004	C1_03120W_A		YDR262W	NA	-0.649897	3.8081e-07	Protein of unknown function
orf19.4577	C4_02150C_A		GPB1	NA	1.04327	3.8695e-07	Protein of unknown function
orf19.2005	C2_01200C_A	REG1	REG1	NA	-1.06648	3.91723e-07	Putative protein phosphatase regulatory subunit; Hap43-repressed gene; macrophage/pseudohyphal-induced; possibly regulated upon hyphal formation; flow model biofilm induced
orf19.5962	C3_04930C_A	HGT4	NA	NA	-0.947118	3.95337e-07	Glucose and galactose sensor; fermentation, filamentation, virulence roles; 20-member glucose transporter family; extended C terminus; high-glucose repressed; macrophage induced; flow model biofilm repressed; Spider biofilm induced
orf19.3341	C1_01530C_A		YDR341C	NA	-0.588815	4.04424e-07	Putative tRNA-Arg synthetase; essential; genes encoding ribosomal subunits, translation factors, and tRNA synthetases are downregulated upon phagocytosis by murine macrophage; downregulated by growth in the mouse cecum
orf19.6007	C3_05280C_A		NA	ELO1	-0.900142	4.17559e-07	Predicted fatty acid acyl transferase-related protein domain; repressed by prostaglandins
orf19.4134	C5_01440C_A		PFA5	NA	1.35842	4.23727e-07	Protein of unknown function
orf19.4662	C4_01260W_A	RLM1	RLM1	NA	0.726113	4.41406e-07	Putative transcription factor; required for wild-type resistance to cell wall perturbation, caspofungin treatment; regulates caspofungin induction of PGA13
orf19.5432	C3_00350W_A	TPT1	TPT1	NA	0.63842	4.55766e-07	tRNA 2'-phosphotransferase; enzyme of tRNA splicing; functionally complements viability of S. cerevisiae tpt1 null mutant
orf19.2559	CR_01680C_A	CDC4	CDC4	NA	0.693246	4.59356e-07	F-box subunit of SCF(CDC4) ubiquitin ligase; functional homolog of S. cerevisiae Cdc4; mutation/depletion causes hyperfilamentation; Sol1 is a substrate of SCF-Cdc4; Spider biofilm induced
orf19.35	C2_06600W_A		NA	NA	-0.811702	4.59356e-07	Predicted kinase; rat catheter, flow model, Spider biofilm induced
orf19.3612	C2_08640C_A	PST2	NA	PST2	-1.14996	4.6078e-07	Putative NADH:quinone oxidoreductase; similar to 1,4-benzoquinone reductase; immunogenic in mice; induced by benomyl, oxidative stress via Cap1; fungal-specific; farnesol-repressed; Spider biofilm induced
orf19.2434	C1_06110C_A	NPL4	NPL4	NA	-0.658097	4.67026e-07	Putative ubiquitin-binding protein; regulated by Gcn2p and Gcn4p
orf19.4970	C1_13430C_A		NA	NA	1.00762	4.6814e-07	Protein of unknown function; Spider biofilm induced
orf19.1926	C5_01400W_A	SEF2	NA	NA	-0.784263	4.68921e-07	Zn(II)2Cys6 transcription factor, required for normal resistance to copper; repressed by Sfu1 in high-iron conditions; regulated by Sef1, Sfu1, and Hap43; rat catheter and Spider biofilm induced
orf19.2737	C4_02620C_A		YDR109C	NA	-1.33261	4.70993e-07	Carbohydrate kinase domain-containing protein; Spider biofilm induced
orf19.1950	C5_01200W_A		POA1	NA	0.970073	4.75858e-07	Protein of unknown function
orf19.4657	C4_01300W_A		NEM1	NA	-1.31578	4.78261e-07	Protein of unknown function
orf19.1666	C3_01800C_A		DIG2	NA	0.801684	4.8609e-07	Ortholog of Dig2, a MAP kinase-responsive inhibitor of Ste12; regulates mating-specific genes and invasive growth in S. cerevisiae; induced by alpha pheromone in SpiderM medium
orf19.1069	C1_04330W_A	RPN4	RPN4	NA	-0.696794	4.89478e-07	C2H2 transcription factor; putative regulator of proteasome genes; DNA recognition sequence (GAAGGCAAAA) enriched in regions upstream of proteasome genes; induced in core stress response; Hap43-induced; Spider biofilm induced
orf19.921	C5_00670C_A	HMS1	NA	NA	-0.869357	4.89517e-07	hLh domain Myc-type transcript factor; required for morphogenesis induced by elevated temperature or Hsp90 compromise; acts downstream of Pcl1; Spider biofilm induced
orf19.2308	C1_11080W_A		PFK27	NA	-0.77274	4.8979e-07	Putative 6-phosphofructo-2-kinase; catalyzes synthesis of fructose-2,6-bisphosphate; Hap43-repressed; flow model, rat catheter and Spider biofilm induced
orf19.6953	C3_03660W_A	IRS4	TAX4	NA	0.952918	5.03245e-07	Protein with roles in cell wall integrity, systemic (but not oral) murine infection, adherence, hyphal growth, and agar-embedded filamentous growth; antigenic in human infection; similar to S. cerevisiae Irs4p
orf19.3949	C5_04640C_A		YTA7	NA	-0.516564	5.04221e-07	Protein of unknown function
orf19.5498	C2_06340W_A	EFH1	NA	NA	1.82217	5.19712e-07	APSES transcription factor; homodimer; minor role in transcriptional regulation vs Efg1; regulates filamentous growth, phenotypic switch; EFG1 and EFH1 genetically interact; expression interferes with mouse intestinal tract colonization
orf19.5299.1	C4_04110W_A		NA	NA	-0.589178	5.25871e-07	Protein of unknown function
orf19.7596	CR_10200W_A		NA	NA	1.27623	5.27332e-07	Protein with a phosphoglycerate mutase family domain; Hap43-repressed gene
orf19.5005	C1_13670W_A	OSM2	OSM1	NA	1.36714	5.44246e-07	Putative mitochondrial fumarate reductase; regulated by Ssn6p, Gcn2p, and Gcn4p; Hog1p-downregulated; stationary phase enriched protein; Hap43p-repressed gene
orf19.4127	C2_04850C_A		YSC84	NA	-0.494528	5.49742e-07	Protein of unknown function
orf19.4110	C2_06090W_A		NA	NA	1.12079	5.49815e-07	Protein of unknown function
orf19.5654	C4_00280W_A	STE24	STE24	NA	0.395529	5.56465e-07	Prenyl-dependent protease
orf19.1863	C2_07620W_A		NA	NA	-1.2076	5.58049e-07	Protein of unknown function
orf19.2219	C2_08240W_A	ORF298	NA	NA	-0.793497	5.58049e-07	Predicted ORF in retrotransposon Tca3; similar to Gag-Pol; a-specific transcript, alpha-factor induced; rat catheter biofilm repressed; mRNA binds She3
orf19.2175	C2_08100W_A		AIF1	NA	-1.0983	5.67444e-07	Putative mitochondrial cell death effector; induced by nitric oxide; Spider biofilm induced; rat catheter biofilm repressed
orf19.423	C1_05420W_A		DCP1	NA	-1.3967	5.7305e-07	Protein of unknown function
orf19.3660	C6_00690W_A		NA	NA	0.988083	5.74033e-07	Protein of unknown function
orf19.4850	C1_09850C_A		YPL260W	NA	-0.761166	5.81064e-07	Protein of unknown function
orf19.3453	C6_02140W_A		NA	NA	0.750673	5.93205e-07	Protein of unknown function
orf19.3794	C4_04850C_A	CSR1	ZAP1	NA	0.982396	5.94553e-07	Transcription factor; role in zinc homeostasis and regulation of Spider biofilm matrix; mutation affects filamentous growth; can suppress S. cerevisiae rok1 mutant inviability; Spider biofilm induced; mutants for abnormal Spider biofilms
orf19.5501	C7_03770C_A	YAF9	YAF9	NA	-0.849111	6.0139e-07	Subunit of the NuA4 histone acetyltransferase complex; transcript regulated by Mig1; possibly an essential gene, disruptants not obtained by UAU1 method
orf19.5647	C4_00220C_A	SUB2	SUB2	NA	-0.618232	6.11814e-07	Putative TREX complex component with a predicted role in nuclear mRNA export; transcription is regulated by Mig1; Hap43-induced gene; Spider biofilm repressed
orf19.522	CR_04340W_A	PIM1	NA	NA	0.974756	6.11979e-07	ATP-dependent Lon protease; role in degradation of misfolded proteins in mitochondria, biogenesis and maintenance of mitochondria; rat catheter biofilm induced
orf19.3278	CR_00780C_A	GSY1	GSY1	NA	-1.13004	6.39885e-07	UDP glucose/starch glucosyltransferase; transcript repressed by yeast-hyphal switch, Efg1-regulated; strong oxidative stress induced; colony morphology-related regulation by Ssn6; stationary phase enriched; flow model biofilm induced
orf19.2183	C2_08000C_A	KRE30	ARB1	NA	0.657134	6.42296e-07	YEF3-subfamily ABC family protein; predicted not to be a transporter; repressed in core stress response; mutation confers hypersensitivity to amphotericin B
orf19.5859	C3_04160W_A	DAL8	NA	DAL5	1.21981	6.58909e-07	Putative allantoate permease; fungal-specific (no human or murine homolog)
orf19.2296	C1_11200W_A		NA	NA	-1.6289	6.5981e-07	Predicted mucin-like protein; ketoconazole-induced; fluconazole-repressed; induced in cyr1 mutant; colony morphology-related gene regulation by Ssn6; flow model biofilm induced; Spider biofilm induced
orf19.2942	C1_02530C_A	DIP5	DIP5	NA	-1.33985	6.64667e-07	Dicarboxylic amino acid permease; mutation confers hypersensitivity to toxic ergosterol analog; induced upon phagocytosis by macrophage; Gcn4-regulated; upregulated by Rim101 at pH 8; rat catheter and Spider biofilm induced
orf19.2529.1	CR_01440C_A		NA	NA	-1.04632	6.7059e-07	Protein of unknown function; Spider biofilm repressed
orf19.1900	C2_07360W_A		TGS1	NA	1.05006	6.81726e-07	Protein of unknown function
orf19.3751	CR_02210W_A		FRK1	NA	0.66407	6.91943e-07	Putative serine/threonine protein kinase; possibly an essential gene, disruptants not obtained by UAU1 method
orf19.5904	C3_04500C_A	RPL19A	RPL19A	NA	-0.628162	7.04267e-07	Ribosomal protein L19; repressed upon phagocytosis by murine macrophages; Hap43-induced gene; Spider biofilm repressed
orf19.732	CR_07170W_A		NA	NA	-1.14745	7.05867e-07	Possible dehydrogenase; flow model biofilm induced; rat catheter biofilm induced; Spider biofilm induced
orf19.4749	C1_08900W_A		NA	NA	-1.0206	7.08265e-07	Protein of unknown function; hyphal-induced expression, regulated by Cyr1, Ras1, Efg1; Hap43-induced gene; Spider biofilm induced
orf19.2867	C4_06650W_A		NA	NA	-0.451309	7.09439e-07	Protein of unknown function
orf19.3668	C1_02110C_A	HGT2	NA	NA	-2.01197	7.10314e-07	Putative MFS glucose transporter; 20 member C. albicans glucose transporter family; 12 probable membrane-spanning segments; expressed in rich medium with 2% glucose; rat catheter and Spider biofilm induced
orf19.1676	C3_01680C_A		YDL183C	NA	-0.825938	7.19616e-07	Predicted potassium ion transporter; Spider biofilm induced
orf19.1856	CR_06780W_A		SDS3	NA	-0.837256	7.20979e-07	Protein of unknown function
orf19.2935	C1_02460W_A	RPL10	NA	NA	-0.553905	7.21987e-07	Ribosomal protein L10; intron in 5'-UTR; downregulated upon phagocytosis by murine macrophage; transcription regulated by yeast-hypha switch; Spider biofilm repressed
orf19.4120	C2_06000W_A	LAS1	LAS1	NA	1.00661	7.3239e-07	Putative bud formation and morphogenesis protein; mutation confers hypersensitivity to 5-fluorocytosine (5-FC), 5-fluorouracil (5-FU); macrophage-induced; Spider biofilm induced
orf19.6414	CR_08450C_A		NA	NA	-1.17354	7.40069e-07	Protein of unknown function
orf19.5618	C6_03300C_A		VPS45	NA	-0.583468	7.72036e-07	Protein of unknown function
orf19.3303	C1_01150C_A		PPM2	NA	-0.611114	7.7644e-07	Protein of unknown function
orf19.2133	C6_04490W_A	LIP4	NA	NA	0.691611	7.77469e-07	Secreted lipase, member of a differentially expressed lipase gene family with possible roles in nutrition and/or in creating an acidic microenvironment; expressed more strongly during mucosal infections than during systemic infections
orf19.3261	CR_00970W_A	ATO9	NA	NA	-1.24868	7.77469e-07	Putative fungal-specific transmembrane protein
orf19.2064	C2_00640W_A		NA	NA	0.714714	7.90496e-07	Putative transcription factor with zinc finger DNA-binding motif
orf19.748	C4_05180C_A		NUP145	NA	-0.548433	7.90496e-07	Protein of unknown function
orf19.2970	C1_02820W_A	LYS2	LYS2	NA	-0.817054	8.08466e-07	Heterodimeric alpha-aminoadipate reductase large subunit; lysine biosynthesis; predicted binding sites for AMP and alpha-aminoadipate; inhibited by lys or thialysine; regulated by Gcn2 and Gcn4; Spider biofilm induced, flow model repressed
orf19.6570	C7_01560C_A	NUP	NA	NA	-1.89372	8.08466e-07	Nucleoside permease; adenosine and guanosine are substrates, whereas cytidine, adenine, guanine, uridine, uracil are not; similar to a nucleoside permease of S. pombe; possibly processed by Kex2p
snR190	C1_08960W_A		NA	NA	-1.70944	8.20181e-07	C/D box small nucleolar RNA (snoRNA)
orf19.6852.1	C1_04590W_A		NA	NA	-1.60521	8.25025e-07	Protein of unknown function; Spider biofilm induced
orf19.1491	C2_01820C_A		SNU71	NA	0.84802	8.41095e-07	Protein of unknown function
orf19.3732	CR_02370W_A	ERG25	NA	NA	-1.55119	8.41389e-07	Putative C-4 methyl sterol oxidase; C4-demethylation of ergosterol biosynthesis intermediates, based on similarity to S. cerevisiae Erg25; fluconazole-induced; induced in azole-resistant strain; rat catheter and Spider biofilm induced
orf19.3122	C4_06890W_A	ARR3	ARR3	NA	1.03025	8.4321e-07	Ortholog of S. cerevisiae Arr3; arsenite transporter of the plasma membrane required for resistance to arsenic compounds; benomyl-induced; Gcn4-regulated; Hap43-repressed; mutant is viable; Spider biofilm induced
orf19.3946	C5_04620C_A		COX18	NA	1.18143	8.4321e-07	Protein of unknown function
orf19.243	C3_02540C_A	OXR1	OXR1	NA	-1.28981	8.4613e-07	Protein of unknown function
orf19.6326	C6_00110C_A		NA	NA	-0.73998	8.5976e-07	Protein of unknown function
orf19.3624	C2_08550C_A	MSU1	DSS1	NA	0.968638	8.69045e-07	Protein of unknown function
orf19.3414	C6_01720C_A	SUR7	SUR7	NA	-0.921037	8.69101e-07	Protein required for normal cell wall, plasma membrane, cytoskeletal organization, endocytosis; localizes to eisosome subdomains of plasma membrane; four transmembrane motifs; mutant shows ectopic, chitin-rich cell wall; fluconazole-induced
orf19.2638.1	C5_03440W_A		NA	NA	-1.38325	8.76471e-07	Protein of unknown function
orf19.3685	C1_02280C_A	PSY2	PSY2	NA	0.675217	8.80187e-07	Putative protein phosphatase PP4 complex subunit; macrophage-induced gene
orf19.6498	C7_02170C_A		IWR1	NA	-0.740641	8.87632e-07	Protein of unknown function
orf19.1261	C4_05760W_A	CGT1	CEG1	NA	0.664197	8.99286e-07	mRNA 5' guanylyltransferase; small subunit of mRNA capping enzyme; binds an RNA Pol II C-terminal domain peptide; Cet1p and Cgt1p form a 2:1 complex; functional homolog of S. cerevisiae Ceg1p
orf19.133	C6_01250W_A		NA	NA	0.813642	9.01458e-07	Protein of unknown function; induced by nitric oxide independent of Yhb1p
orf19.5911	C3_04550C_A	CMK1	TDA1	NA	-0.897954	9.01458e-07	Putative calcium/calmodulin-dependent protein kinase II; expression regulated upon white-opaque switching; biochemically purified Ca2+/CaM-dependent kinase is soluble, cytosolic, monomeric, and serine-autophosphorylated; Hap43p-repressed
orf19.4699	C4_00950C_A		TGL3	NA	-0.705646	9.10158e-07	Putative phospholipase of patatin family; similar to S. cerevisiae Tgl3p; predicted Kex2p substrate
orf19.745	C4_05150W_A	VAC8	NA	NA	-0.531278	9.38672e-07	Protein involved in vacuolar inheritance; required for hyphal growth; contains armadillo repeats
orf19.996	C1_10520W_A		NA	NA	1.00623	9.43299e-07	Protein with a predicted leucine-rich repeat domain; possibly an essential gene, disruptants not obtained by UAU1 method
orf19.5284	CR_05420W_A		NA	NA	1.79765	9.55188e-07	Dubious open reading frame
orf19.4670	C4_01190W_A	CAS5	MOT3	NA	0.755666	9.72057e-07	Transcription factor; cell wall damage response; required for adherence, response/resistance to caspofungin; repressed in core stress response; mutants have reduced CFU in mice, hyphal defect in C. elegans infection; Spider biofilm induced
orf19.2270	C2_07160W_A	SMF12	SMF1	NA	-0.863221	9.85522e-07	Ortholog of S. cerevisiae Smf1; manganese transporter; Gcn4-regulated; Hap43, alkaline induced; caspofungin repressed; mutants are viable
orf19.6853	C1_04600C_A		NA	NA	1.05541	9.96729e-07	Protein of unknown function; Spider biofilm repressed
orf19.4788	C1_09290C_A	ARG5,6	ARG5,6	NA	1.02587	1.00327e-06	Arginine biosynthetic enzyme; processed in S. cerevisiae into 2 polypeptides with acetylglutamate kinase (Arg6) activity and acetylglutamate-phosphate reductase (Arg5) activity; Gcn4 regulated; alkaline repressed; Spider biofilm induced
orf19.1208	C4_03990C_A		NA	NA	0.960304	1.00645e-06	Predicted ORF in the Major Repeat Sequence on chromosome 4; member of a family encoded by FGR6-related genes in the RB2 repeat sequence
orf19.4590	C4_02030W_A	RFX2	NA	NA	1.01499	1.01762e-06	Transcriptional repressor; regulator of filamentation, response to DNA damage, adhesion, virulence in murine mucosal, systemic infections; RFX domain; regulated by Nrg1, UV-induced; partially complements S. cerevisiae rfx1 mutant defects
orf19.1599	C2_09410W_A		NA	NA	-1.79453	1.02874e-06	Protein of unknown function
orf19.1096	C6_04370W_A		NA	NA	0.581132	1.0516e-06	Protein of unknown function
orf19.3726	CR_02410W_A		NA	NA	0.570938	1.05354e-06	Protein of unknown function
orf19.2002	C2_01220W_A		NIC96	NA	-0.660487	1.08984e-06	Protein of unknown function
orf19.7046	C7_00730W_A	MET28	MET28	NA	-1.45939	1.08984e-06	Predicted bZIP domain-containing transcription factor; protein induced during the mating process; possibly essential, disruptants not obtained by UAU1 method; Hap43-repressed; rat catheter biofilm induced
orf19.6284	CR_07660C_A		SRP102	NA	-1.13152	1.09395e-06	Protein of unknown function
orf19.6143	CR_07250C_A		NA	NA	1.23792	1.10814e-06	Predicted long-chain-alcohol oxidase; Spider biofilm induced
orf19.318	C3_03190C_A		IBA57	NA	0.933	1.10927e-06	Protein of unknown function
orf19.3689	C1_02320C_A		YLR345W	NA	-0.588913	1.12214e-06	Putative protein similar to 6-phosphofructo-2-kinase/fructose-2,6-bisphosphatase; expression downregulated in an ssr1 null mutant
orf19.3007	C1_03140W_A		CNL1	NA	-0.691714	1.13759e-06	Protein of unknown function
orf19.6496	C7_02180C_A	TRS33	TRS33	NA	-0.523067	1.16565e-06	Putative TRAPP complex subunit; constitutive expression independent of MTL or white-opaque status
orf19.3275	CR_00810W_A		NA	NA	-0.836982	1.23122e-06	Protein of unknown function
orf19.6881	C2_05690C_A	YTH1	YTH1	NA	-0.86698	1.23122e-06	Putative mRNA cleavage and polyadenylation specificity factor; transcription is regulated upon yeast-hyphal switch; decreased expression in hyphae compared to yeast-form cells; fluconazole or flucytosine induced
orf19.7460	CR_00670C_A		TRM13	NA	1.11869	1.23122e-06	Putative 2'-O-methyltransferase with a predicted role in tRNA modification; transcription is activated in the presence of elevated CO2
orf19.55	C1_05010C_A		IZH1	NA	-1.44697	1.23759e-06	Protein of unknown function
orf19.1684	C3_01590W_A		NA	NA	0.767874	1.23955e-06	Protein of unknown function
orf19.2138	C6_04520W_A	ILS1	ILS1	NA	-0.600902	1.23955e-06	Putative isoleucyl-tRNA synthetase, the target of drugs including the cyclic beta-amino acid icofungipen/PLD-118/BAY-10-8888 and mupirocin; protein present in exponential and stationary growth phase yeast cultures
orf19.4903	C1_10320W_A		GPI12	NA	-1.09627	1.23955e-06	Protein of unknown function
orf19.2884	C4_06500W_A	CDC68	SPT16	NA	-0.404624	1.24083e-06	Functional homolog of S. cerevisiae Cdc68, a transcription elongation factor; essential; possible drug target
orf19.7452	C3_06630W_A		SLD3	NA	1.38137	1.26408e-06	Protein of unknown function
orf19.1183	C6_00250W_A		NA	NA	-1.15704	1.30132e-06	Protein of unknown function
orf19.4246	C5_02380W_A		NA	NA	-0.958401	1.3021e-06	Protein with similarity to S. cerevisiae Ykr070w; Tn mutation affects filamentation; Hog1-repressed; colony morphology-related gene regulation by Ssn6p; induced during cell wall regeneration; possibly essential
orf19.2748	C4_02530W_A	ARG83	NA	NA	0.673777	1.30973e-06	GAL4-like Zn(II)2Cys6 transcription factor; clade-associated expression; null shows abnormal regulation of invasive colony growth, is unable to utilize proline as a nitrogen source; flow model biofilm induced
orf19.2672	C4_03180W_A	NCP1	NA	NA	-0.753212	1.33799e-06	NADPH-cytochrome P450 reductase, acts with Erg11p in sterol 14 alpha-demethylation in ergosterol biosynthesis; subject to hypoxic regulation; ketoconazole-induced; caspofungin repressed
orf19.51	C1_04970W_A		NA	NA	1.13237	1.37958e-06	Protein of unknown function
orf19.5566	C6_02900C_A		AIM22	NA	1.07515	1.39653e-06	Protein of unknown function
orf19.699	CR_06650C_A		NA	NA	-1.68264	1.39653e-06	Protein of unknown function; flow model, rat catheter, Spider biofilm induced
orf19.1277	C4_05900C_A		NA	NA	1.24869	1.39677e-06	Protein of unknown function; Rgt1, Hap43-repressed; flow model biofilm induced; Spider biofilm induced
orf19.2040	C2_00840W_A		TAH18	NA	0.520163	1.39857e-06	Protein of unknown function
orf19.4747	C1_08880W_A	HEM14	HEM14	NA	-1.05949	1.43574e-06	Putative protoporphyrinogen oxidase; involved in heme biosynthesis; predicted Kex2p substrate; iron regulated transcript; Yfh1-induced; Hap43-repressed; rat catheter biofilm repressed
orf19.641	CR_05130C_A		ERJ5	NA	0.785912	1.43574e-06	Protein of unknown function
orf19.8278	C1_11410C_A		NA	NA	2.81567	1.45922e-06	Predicted ORF from original SGTC Assembly 19 annotation, removed from the reduced ORF set by the SGTC; subsequently reinstated in Assembly 21 based on comparative genome analysis
orf19.2901	C4_06350C_A	NUP60	NUP60	NA	-0.691974	1.49902e-06	Ortholog of S. cerevisiae Nup60p; a subunit of the nuclear pore complex; mutants are viable
orf19.2016	C2_01090C_A	ERG28	NA	NA	-0.653615	1.51649e-06	Protein of unknown function
orf19.4186	C4_00570C_A	PCT1	PCT1	NA	-0.735819	1.5205e-06	Putative choline-phosphate cytidylyl transferase, antigenic during human oral infection
orf19.3182	C5_01910W_A	GIS2	GIS2	NA	-0.55093	1.53532e-06	Translational activator for mRNAs with internal ribosome entry sites; induced in high iron; repressed by yeast-hypha switch; null exhibits sensitivity to sorbitol, 5-fluorocytosine, and cold temperatures; Spider biofilm repressed
orf19.3773	C4_05060W_A	CDL1	NA	NA	0.831114	1.55404e-06	Putative RNAse III, ortholog of S. cerevisiae RNT1; merged with orf19.3772 in Assembly 21
orf19.1648	C3_02000W_A	RAD50	RAD50	NA	0.564736	1.57764e-06	Putative DNA double-strand break repair factor; involved in response to oxidative stress and drug resistance; flow model biofilm repressed
snR128	C1_08970W_A		NA	NA	-0.658457	1.58684e-06	C/D box small nucleolar RNA (snoRNA)
orf19.4371	CR_03720W_A	TAL1	TAL1	NA	-0.752912	1.60359e-06	Transaldolase; protein present in exponential and stationary growth phase yeast cultures; oxidative stress-induced via Cap1; induced by nitric oxide independent of Yhb1p; sumoylation target; rat catheter biofilm repressed
orf19.6912	C7_01320W_A		NA	NA	-0.666851	1.60514e-06	Putative ethanolamine kinase
orf19.826	C2_03980C_A	MED1	NA	NA	0.650399	1.62926e-06	RNA polymerase II mediator complex subunit; RNA polymerase II transcription cofactor
orf19.255	C3_02640C_A	ZCF1	NA	NA	-0.722972	1.6794e-06	Zn(II)2Cys6 transcription factor; transcript regulated during hypha formation; 5'-UTR intron; mutants show decreased colonization of mouse kidneys; flow model biofilm induced; Spider biofilm induced
orf19.4297	C5_02760W_A	CKB2	CKB2	NA	-0.421373	1.77388e-06	Regulatory subunit of protein kinase CK2 (casein kinase II), beta' subunit; null mutants are hypersensitive to caspofungin
orf19.489	CR_04060C_A	DAP1	DAP1	NA	-0.786676	1.79069e-06	Similar to mammalian membrane-associated progesterone receptors involved in DNA damage response; induced in core stress response; Hog1 regulated; clade-associated expression; Hap43-repressed
orf19.4811	C1_09470C_A		FSF1	NA	0.907244	1.80856e-06	Putative tricarboxylate carrier family protein; localized to the mitochondrial membrane
orf19.3950	C5_04650C_A	MSM1	MSM1	NA	0.832837	1.8493e-06	Mitochondrial methionyl-tRNA synthetase (MetRS); functionally complements methionine auxotrophy of an E. coli MetRS mutant; transcript regulated by Nrg1; flow model biofilm induced
orf19.874	C2_03460C_A		MGR1	NA	-0.566464	1.85226e-06	Predicted mitochondrial i-AAA protease supercomplex; degrades misfolded mitochondrial proteins; Hap43-repressed gene
TER1	CR_05370W_A		NA	NA	1.02869	1.90678e-06	Telomerase RNA; provides the template for the telomerase reverse transcriptase TERT/EST2
orf19.1942	C5_01270W_A	SGE1	NA	NA	0.661916	1.90679e-06	Putative multidrug resistance factor; induced in low iron; regulated by Sef1, Sfu1, and Hap43
orf19.3105	C4_07040W_A		NA	NA	1.24376	1.93135e-06	Putative cytochrome P450 protein; possibly an essential gene, disruptants not obtained by UAU1 method
orf19.6474	C7_02370W_A		NA	NA	-1.01669	1.93135e-06	Protein with chitin synthesis regulation, resistance to Congo red domain; membrane-localized protein; Spider biofilm induced
orf19.2762	C4_02410C_A	AHP1	AHP1	NA	-1.18748	1.95734e-06	Alkyl hydroperoxide reductase; immunogenic; fluconazole-induced; amphotericin B, caspofungin, alkaline repressed; core stress response induced; Ssk1/Nrg1/Tup1/Ssn6/Hog1 regulated; flow model biofilm induced; rat catheter biofilm repressed
orf19.1299	C4_03790W_A	RPN6	RPN6	NA	-0.470177	1.96371e-06	Putative 26S proteasome subunit; Hap43p-induced gene; regulated by Gcn2p and Gcn4p
orf19.3679	C1_02220C_A		YNL200C	NA	-0.66839	1.99404e-06	Putative protein of unknown function; stationary phase enriched protein
orf19.2709	C4_02870C_A	ZUO1	NA	NA	-0.673607	1.99835e-06	Ortholog of S. cerevisiae Zuo1; a cytosolic ribosome-associated chaperone; likely to be essential for growth, based on an insertional mutagenesis strategy; Spider biofilm repressed
orf19.5117	C1_08360C_A	OLE1	OLE1	NA	-0.687927	2.00562e-06	Fatty acid desaturase, essential protein involved in oleic acid synthesis; required for aerobic hyphal growth and chlamydospore formation; subject to hypoxic regulation; fluconazole-induced; caspofungin repressed; Hap43p-induced
orf19.3160	C5_02080C_A	HSP12	NA	NA	-1.55474	2.03304e-06	Heat-shock protein; induced by osmotic/oxidative/cadmium stress, fluphenazine treatment, low iron, CDR1 and CDR2 overexpression, or ssn6 or ssk1 null mutation; overexpression increases resistance to farnesol and azoles
orf19.6024	C1_00820W_A		NA	NA	-0.68888	2.03892e-06	Protein of unknown function
orf19.2396	CR_03280W_A	IFR2	NA	NA	-1.06678	2.07767e-06	Zinc-binding dehydrogenase; induced by benomyl, ciclopirox olamine, alpha pheromone, Hap43; regulated by oxidative stress via Cap1, osmotic stress via Hog1; protein present in exponential and stationary phase; rat catheter biofilm repressed
orf19.5646	C4_00210W_A		YPL034W	NA	0.769753	2.07767e-06	Protein of unknown function
orf19.2095	C2_00360C_A		FRA1	NA	-0.612703	2.16456e-06	Protein of unknown function
orf19.6431	CR_08580C_A		NA	NA	1.04694	2.26376e-06	Protein of unknown function; Spider biofilm induced
orf19.2193	C2_07890W_A	PRS5	NA	NA	-0.608364	2.29509e-06	Putative 5-phospho-ribosyl-1(alpha)-pyrophosphate synthetase; Hap43-induced; repressed during core stress response
orf19.4507	C2_04450W_A		NA	NA	1.44473	2.34737e-06	Protein of unknown function; Hap43-repressed; rat catheter biofilm repressed
orf19.6844	C1_04500W_A	ICL1	ICL1	NA	-1.41868	2.35729e-06	Isocitrate lyase; glyoxylate cycle enzyme; required for virulence in mice; induced upon phagocytosis by macrophage; farnesol regulated; Pex5-dependent peroxisomal localization; stationary phase enriched; rat catheter, Spider biofilm induced
orf19.4428	C1_07400C_A		NA	NA	0.633237	2.40109e-06	Protein of unknown function
orf19.6043	C1_00630W_A		NA	NA	1.06627	2.40109e-06	Protein of unknown function
orf19.5143	C7_03120W_A	TIM54	TIM54	NA	0.814809	2.4948e-06	Predicted component of the mitochondrial TIM22 complex; involved in protein import into mitochondrial inner membrane; Spider biofilm repressed
orf19.6240	C1_06700W_A		CYK3	NA	-1.20708	2.4961e-06	SH3-domain protein; role in barrier septum assembly involved in cell cycle cytokinesis; activates the Chs2 chitin synthase activity during cytokinesis; Spider biofilm repressed
orf19.6514	C7_02040C_A	CUP9	TOS8	NA	-0.828455	2.57391e-06	Transcription factor; represses SOK1 expression in response to farnesol inhibition; yeast-hypha switch repressed; ketoconazole-induced; Plc1-regulated; colony morphology-related Ssn6 regulation; Spider, flow model biofilm induced
orf19.7228	C1_14200W_A		GMH1	NA	-0.868807	2.61167e-06	Possible Golgi membrane protein; transcript positively regulated by Tbf1; mRNA binds She3
orf19.2615	CR_02150W_A	MDL1	MDL1	NA	0.595754	2.65155e-06	Putative mitochondrial, half-size MDR-subfamily ABC transporter
orf19.478	CR_03960C_A		MON1	NA	0.892587	2.67647e-06	Protein required for fusion of cvt-vesicles and autophagosomes with the vacuole; plays a role in autophagy, protein targeting to vacuole and vesicle docking; flow model biofilm induced
orf19.3859	CR_06070W_A		IFA38	NA	-0.841165	2.71402e-06	Putative microsomal beta-keto-reductase; transcript upregulated by treatment with ciclopirox olamine; induced by alpha pheromone in SpiderM medium; regulated by Sef1, Sfu1, and Hap43
orf19.7577	CR_10010C_A	MSS51	MSS51	NA	0.942718	2.71402e-06	Putative mRNA maturation factor; fungal-specific (no human or murine homolog)
orf19.7601	CR_10260W_A		MRM2	NA	0.928253	2.72122e-06	Putative mitochondrial 2' O-ribose methyltransferase; predicted role in methylation of U(2791) in 21S rRNA; Spider biofilm induced
orf19.3127	C4_06820C_A	CZF1	NA	NA	-0.831286	2.75113e-06	Transcription factor; regulates white-opaque switch; hyphal growth regulator; expression in S. cerevisiae causes dominant-negative inhibition of pheromone response; required for yeast cell adherence to silicone; Spider biofilm induced
orf19.1560	C2_02380W_A	POB3	POB3	NA	-0.469991	2.75118e-06	Protein involved in chromatin assembly and disassembly; ortholog of S. cerevisiae Pob3; transposon mutation affects filamentous growth; rat catheter biofilm repressed
orf19.5776	C2_03180C_A	TOM1	TOM1	NA	-0.599201	2.78773e-06	Putative E3 ubiquitin ligase; transcript regulated by Nrg1 and Mig1
orf19.3925	C5_04390C_A		NA	NA	2.30302	2.79905e-06	Putative protein of unknown function, transcription is activated in the presence of elevated CO2
orf19.94	C6_00930C_A		NA	NA	-0.969826	2.82088e-06	Protein of unknown function; Spider biofilm induced
orf19.585	C5_00820W_A		MRPL17	NA	0.696702	2.82755e-06	Protein of unknown function
orf19.769	C1_04750W_A	IFE1	BDH2	NA	-1.04268	2.82881e-06	Putative medium-chain alcohol dehydrogenase; rat catheter and Spider biofilm repressed
orf19.2738	C4_02610C_A	SUL2	SUL1	NA	1.5535	2.88204e-06	Putative sulfate transporter; transcript negatively regulated by Sfu1; amphotericin B induced; F-12/CO2 and Spider biofilm induced
orf19.1354	C2_08290C_A	UCF1	RGI1	NA	-1.02771	2.88707e-06	Upregulated by cAMP in filamentous growth; induced in high iron, decreased upon yeast-hypha switch; downregulation correlates with clinical fluconazole resistance; Ras1-regulated; Hap43-repressed; flow model biofilm induced
orf19.7571	CR_09970W_A	UBC4	UBC4	NA	-0.613151	2.93001e-06	Protein of unknown function
orf19.3920	C5_04340W_A		MPD1	NA	0.741781	2.98576e-06	Protein of unknown function
orf19.1395	C2_09590C_A		PIC2	NA	-0.907744	3.03754e-06	Protein of unknown function
orf19.3713	CR_07840C_A		NA	NA	-0.857821	3.06639e-06	Protein of unknown function; flow model biofilm induced; Spider biofilm induced; induced by Mnl1 under weak acid stress; transcript detected in high-resolution tiling arrays
orf19.3661	C1_02040C_A		NA	NA	-0.977379	3.06647e-06	Putative deubiquitinating enzyme; induced by Mnl1 under weak acid stress
orf19.261	C3_02690C_A		SEC59	NA	-0.540665	3.06664e-06	Protein of unknown function
orf19.2459	C1_05900W_A		NA	NA	0.744682	3.18573e-06	Protein of unknown function; mRNA binds to She3; Hap43 repressed gene; Spider biofilm induced
orf19.7489	CR_00440C_A	LRG1	LRG1	NA	0.679576	3.27912e-06	Protein of unknown function
orf19.1189	C6_00290W_A		NA	NA	-0.913771	3.30022e-06	Protein of unknown function; regulated by yeast-hypha switch; induced by Mnl1 in weak acid stress; 5' UTR intron; repressed by chlamydospore formation in C. albicans and C. dubliniensis; rat catheter, Spider and flow model biofilm induced
orf19.7016	C7_00980W_A	PHM5	PPN1	NA	0.864797	3.32749e-06	Protein of unknown function
orf19.5517	C6_02480W_A		ADH7	NA	-0.607941	3.3367e-06	Similar to alcohol dehydrogenases; induced by benomyl treatment, nitric oxide; induced in core stress response; oxidative stress-induced via Cap1; Spider biofilm repressed
orf19.7156	C7_04180W_A	FAA2-3	NA	FAA2	1.48003	3.48253e-06	Predicted acyl CoA synthetase
orf19.4777	C1_09190C_A	DAK2	DAK2	NA	-0.908047	3.50118e-06	Putative dihydroxyacetone kinase; repressed by yeast-hypha switch; fluconazole-induced; caspofungin repressed; protein enriched in stationary phase yeast cultures; flow model biofilm induced; rat catheter and Spider biofilm repressed
orf19.4162	C4_00790C_A	MLH1	NA	NA	1.05923	3.51431e-06	Putative mismatch repair protein; cell-cycle regulated periodic mRNA expression
orf19.6952	C3_03670W_A		HDA2	NA	-0.491715	3.58864e-06	Protein of unknown function
orf19.7481	CR_00540C_A	MDH1	MDH2	NA	-0.950933	3.60895e-06	Mitochondrial malate dehydrogenase; regulated by Mig1, Tup1, white-opaque switch, phagocytosis; induced in high iron; antigenic during murine and human infection; repressed in Spider biofilms by Bcr1, Tec1, Ndt80, Rob1, Brg1
orf19.2065	C2_00630C_A		DAL2	NA	0.704096	3.64042e-06	Protein of unknown function
orf19.3792	C4_04870C_A		PAT1	NA	-0.518904	3.69994e-06	Protein of unknown function
orf19.4384	CR_03450W_A	HXT5	NA	NA	-1.74032	3.76265e-06	Putative sugar transporter; induced by ciclopirox olamine; Snf3-induced; alkaline repressed; colony morphology-related gene regulation by Ssn6; possibly essential gene
orf19.4063	C1_05080W_A	GPT1	NA	NA	1.24922	3.92451e-06	GABA/polyamine transporter; 9 to 11 membrane spanning segments; complements GABA uptake defect of an S. cerevisiae uga4 put4 gap1 triple mutant; complements growth of an S. cerevisiae spe1 mutant under polyamine limitation
orf19.5065	C1_07930C_A	ERD1	ERD1	NA	-1.29511	3.98745e-06	Putative membrane protein required for the retention of lumenal endoplasmic reticulum proteins; rat catheter biofilm induced
orf19.3919.1	C5_04330W_A		NA	NA	0.632207	3.99758e-06	Putative adhesin-like protein
orf19.6310	CR_04830C_A		NA	NA	-0.795746	4.35534e-06	Protein of unknown function
orf19.734	CR_07150W_A	GLK1	GLK1	NA	-0.844192	4.35619e-06	Putative glucokinase; transcript regulated upon yeast-hyphal switch; Efg1 regulated; fluconazole-induced; induced in core stress response; colony morphology-related gene regulation by Ssn6; GlcNAc-induced protein
orf19.2969	C1_02810W_A	RAD16	RAD16	NA	-1.02252	4.40369e-06	Ortholog of S. cerevisiae Rad16; a protein that recognizes and binds damaged DNA; flucytosine induced; rat catheter and Spider biofilm induced
orf19.2715	C4_02800W_A	RPC53	RPC53	NA	1.05126	4.43741e-06	Protein of unknown function
orf19.5350	C2_10700C_A		CTK3	NA	-1.22238	4.50574e-06	Protein of unknown function
orf19.5412	C3_00510W_A		ECM9	NA	0.864741	4.53552e-06	Protein of unknown function
orf19.5757	C6_03820C_A		YMR178W	NA	-0.543058	4.6197e-06	Protein of unknown function
orf19.5306	C4_04040W_A		NA	NA	-1.69439	4.76408e-06	Protein of unknown function
orf19.1746	C2_10320C_A		SSP2	NA	-1.28935	4.80108e-06	Protein similar to S. cerevisiae meiosis-specific, spore-wall-localized protein Ssp2p, which is required for wild-type outer spore wall formation in S. cerevisiae; possibly an essential gene (UAU1 method); Hap43p-repressed
orf19.1969	C5_01010W_A	CCW14	NA	NA	0.797678	4.83133e-06	Putative mannoprotein of cell wall with role in response to stress; increased mRNA abundance observed in cyr1 homozygous mutant (hyphal or yeast-form cells) and in ras1 homozygous mutant (yeast-form cells)
orf19.2896	C4_06390W_A	SOU1	NA	NA	-1.20529	5.00318e-06	Enzyme involved in utilization of L-sorbose; has sorbitol dehydrogenase, fructose reductase, and sorbose reductase activities; NAD-binding site motif; transcriptional regulation affected by chromosome 5 copy number; Hap43p-induced gene
orf19.3503	C6_02080W_A		NA	NA	0.918433	5.07591e-06	Protein of unknown function
orf19.6148	CR_07220C_A		NDL1	NA	0.980001	5.0781e-06	Homolog of nuclear distribution factor NudE, NUDEL; regulates dynein targeting to microtubule plus ends; flow model biofilm repressed
orf19.5938	C3_04760C_A	SEN1	SEN1	NA	0.942539	5.08841e-06	Putative helicase; repressed by prostaglandins
orf19.3475	C6_02330W_A		NA	NA	-0.717412	5.09435e-06	Described as a Gag-related protein; hyphal induced; downregulation correlates with clinical development of fluconazole resistance; repressed by nitric oxide, 17-beta-estradiol, ethynyl estradiol
orf19.4608	C4_01850C_A	PDC12	NA	NA	1.01161	5.16332e-06	Putative pyruvate decarboxylase; fungal-specific (no human or murine homolog)
orf19.2579	CR_01790C_A		MSH4	NA	0.718496	5.29572e-06	Msh4 ortholog of S. cerevisiae; involved in meiotic recombination and is required for normal levels of crossing over; Spider biofilm induced
orf19.6353	C1_12700W_A		NA	NA	0.963839	5.48089e-06	Protein of unknown function
orf19.1993	C2_01320W_A		RPN9	NA	-0.783352	5.52284e-06	Protein of unknown function
orf19.2167	C2_08180C_A		RRP14	NA	1.2169	5.56427e-06	Protein of unknown function
orf19.979	C5_00190C_A	FAS1	FAS1	NA	-1.25948	5.56427e-06	Beta subunit of fatty-acid synthase; multifunctional enzyme; Hap43, fluconazole-induced; amphotericin B, caspofungin repressed; macrophage/pseudohyphal-induced; flow model and Spider biofilm repressed
orf19.3997	C5_05050W_A	ADH1	NA	NA	-0.721564	5.66797e-06	Alcohol dehydrogenase; oxidizes ethanol to acetaldehyde; at yeast cell surface; immunogenic in humans/mice; complements S. cerevisiae adh1 adh2 adh3 mutant; fluconazole, farnesol-induced; flow model biofilm induced; Spider biofilm repressed
orf19.5906	C3_04520C_A	ADE2	NA	NA	-0.66351	5.76238e-06	Phosphoribosylaminoimadazole carboxylase; role in adenine biosynthesis; required for normal growth and virulence in immunosuppressed mouse infection; not induced in GCN response, in contrast to S. cerevisiae ADE2; stationary phase-enriched
orf19.449	C1_05160C_A		NA	NA	-1.01601	5.80863e-06	Putative phosphatidyl synthase; stationary phase enriched protein; transcript repressed by yeast-hypha switch; Hap43-repressed; rat catheter, Spider and flow model biofilm induced
orf19.3222	CR_01320C_A		YGR125W	NA	-0.659956	5.88704e-06	Predicted vacuolar protein; rat catheter biofilm repressed; flow model biofilm repressed
orf19.1117	C5_03770C_A		NA	NA	1.1527	5.91417e-06	Protein similar to Candida boidinii formate dehydrogenase; virulence-group-correlated expression; Hap43-repressed; Spider biofilm repressed
orf19.2050	C2_00740C_A		NA	NA	-0.821617	5.97943e-06	Protein of unknown function
orf19.5377	C3_00780W_A	HOS2	HOS2	NA	-0.6332	6.00509e-06	Putative histone deacetylase; mutations affect filamentous growth; genetic evidence suggests that Set3p and Hos2p function together as a complex involved in regulation of white-opaque switching, morphogenesis, and virulence
orf19.6860	C4_05210W_A		PIS1	NA	-0.673714	6.00509e-06	Protein of unknown function
orf19.3289	C1_01000C_A		ORC6	NA	-0.739306	6.20157e-06	Phosphorylated protein of unknown function
orf19.3601	C2_08740W_A		NA	NA	-0.499362	6.20157e-06	Protein of unknown function
orf19.5194.1	C1_04430C_A		NA	NA	0.650621	6.26074e-06	Putative protein of unknown function; clade-associated gene expression
orf19.4560	C4_02270C_A	BFR1	BFR1	NA	0.613182	6.30309e-06	Protein involved in the maintenance of normal ploidy; S. cerevisiae ortholog cofers Brefeldin A resistance; stationary phase enriched protein; Spider biofilm repressed
orf19.4991	C1_13570W_A	MPT5	MPT5	NA	0.756023	6.32592e-06	Putative RNA-binding protein; Hap43p-repressed gene; protein induced during the mating process
orf19.2479	C1_05710C_A	UGA4	UGA4	NA	1.87434	6.34464e-06	Putative gamma-aminobutyric acid/polyamine permease; nitrogen catabolite repressed gene, induced in absence of preferred N sources; transcriptionally induced upon phagocytosis by macrophage; gene regulation by nitrogen source requires Gat1p
orf19.203	C2_09010W_A	STB3	STB3	NA	-0.900072	6.44159e-06	Putative SIN3-binding protein 3 homolog; caspofungin induced; macrophage/pseudohyphal-repressed; rat catheter biofilm induced
orf19.1470	C2_01610C_A	RPS26A	RPS26A	NA	-0.622537	6.55832e-06	Ribosomal protein; regulated by Nrg1, Tup1; repressed upon phagocytosis by murine macrophage; alternatively spliced intron in 5'-UTR; Spider biofilm repressed
orf19.5722	C6_03550C_A		NSI1	NA	0.625546	6.60304e-06	Protein of unknown function
orf19.518	CR_04300W_A		NCL1	NA	-1.19946	6.66667e-06	Protein of unknown function
orf19.4216	C5_02110W_A		HSP12	NA	-1.51615	6.69611e-06	Putative heat shock protein; decreased expression in hyphae; transcription is increased in populations of cells exposed to fluconazole over multiple generations; overexpression increases resistance to farnesol and azoles
orf19.7367	C3_05870C_A	UBP1	UBP1	NA	0.520196	6.8506e-06	Protein of unknown function
orf19.6757	C3_07340W_A	GCY1	GCY1	NA	-0.775772	6.85605e-06	Aldo/keto reductase; mutation confers hypersensitivity to toxic ergosterol analog; farnesol-repressed; stationary phase enriched protein; flow model biofilm induced; Spider biofilm repressed
orf19.5032	C1_13940W_A	SIM1	UTH1	NA	-0.663002	6.87728e-06	Adhesin-like protein; involved in cell wall maintenance, redundant with Sun41; possibly secreted; macrophage-repressed; repressed by Rim101, Cyr1, Ras1; Spider biofilm induced
orf19.6566	C7_01590C_A		NA	NA	1.0855	7.01779e-06	Protein of unknown function
orf19.2236	C2_06830C_A	FHL1	FHL1	NA	0.862246	7.13046e-06	Fork-head transcription factor; forms a heterodimer with Ifh1 that is tethered to promoters by Tbf1; positively regulates rRNA and ribosomal protein gene transcription
orf19.5626	C6_03370W_A		NA	NA	-0.801833	7.26737e-06	Protein of unknown function; Plc1-regulated; induced by Mnl1 under weak acid stress; flow model biofilm induced
orf19.7313	CR_09170C_A	SSU1	SSU1	NA	-0.801249	7.28861e-06	Protein similar to S. cerevisiae Ssu1 sulfite transport protein; Tn mutation affects filamentous growth; regulated by Gcn2 and Gcn4; induced by nitric oxide; Hap43-repressed; Spider and flow model biofilm induced
orf19.1797	C4_05400C_A		NA	NA	-0.6334	7.30372e-06	D-arabinose 5-phosphate isomerase; has GutQ domain which is associated with phosphosugar binding; other biofilm induced; rat catheter and Spider biofilm induced; F-12/CO2 early biofilm induced
orf19.3712	CR_07830C_A		NA	NA	-0.642161	7.3142e-06	Protein of unknown function; induced by Mnl1 under weak acid stress; flow model biofilm induced; Spider biofilm induced
orf19.4211	C6_00480C_A	FET31	NA	NA	-1.3685	7.43214e-06	Multicopper oxidase; for growth in low iron, prostaglandin E2 synthesis; ketoconazole/caspofungin/amphotericin B repressed; Sef1/Sfu1/Hap43 regulated; reports differ if functional homolog of ScFet3; rat catheter and Spider biofilm induced
orf19.5379	C3_00760W_A	ERG4	ERG4	NA	-1.2132	7.43214e-06	Protein similar to sterol C-24 reductase; shows Mob2p-dependent hyphal regulation; fluconazole-induced; caspofungin repressed; rat catheter biofilm repressed
orf19.4688	C4_01010C_A	DAG7	NA	NA	1.1875	7.4986e-06	Secretory protein; a-specific, alpha-factor induced; mutation confers hypersensitivity to toxic ergosterol analog; fluconazole-induced; induced during chlamydospore formation in C. albicans and C. dubliniensis
orf19.897	C2_03310C_A	VPS20	VPS20	NA	0.818087	7.72364e-06	ESCRT III complex protein; role in multivesicular body (MVB) trafficking; required for processing of Rim8; Bcr1-repressed in RPMI a/a biofilms
orf19.2204.2	C2_07750W_A	RHO2	RHO2	NA	0.624918	8.0781e-06	Protein of unknown function
orf19.1667	C3_01790C_A		NA	NA	0.976836	8.22796e-06	Protein with a predicted SWI/SNF-related matrix-associated actin-dependent regulator of chromatin subfamily domain; Hap43-repressed gene
orf19.2278	C2_07220W_A		ADD66	NA	-0.999016	8.27454e-06	Putative 20S proteasome assembly protein; filament induced; induced by alpha pheromone in SpiderM medium
orf19.382	C1_08380W_A	TEF2	TEF2	NA	-0.60152	8.30662e-06	Translation elongation factor 1-alpha; genes encoding ribosomal subunits, translation factors, and tRNA synthetases are downregulated upon phagocytosis by murine macrophage
orf19.5537	C6_02670C_A	WSC2	NA	NA	0.775211	8.39361e-06	Putative cell wall integrity and stress response protein; mRNA binds She3; Spider biofilm induced
snR5d	CR_06600C_A		NA	NA	-0.935058	8.39361e-06	H/ACA box small nucleolar RNA (snoRNA)
orf19.5447	C3_00220W_A	HGT19	NA	NA	-1.82504	8.60083e-06	Putative MFS glucose/myo-inositol transporter; 20 member family; 12 transmembrane segments, extended N terminus; expressed in rich medium; Hap43, phagocytosis, rat catheter, Spider and flow model biofilm induced
orf19.3942.1	C5_04590C_A	RPL43A	RPL43A	NA	-0.878278	8.76696e-06	Putative ribosomal protein, large subunit; repressed by human whole blood or PMNs; colony morphology-related gene regulation by Ssn6; Spider biofilm repressed
orf19.6121	CR_07450C_A	MNL1	COM2	NA	0.599076	9.44036e-06	Transcription factor; induces transcripts of stress response genes via SLE (STRE-like) elements; required for adaptation to weak acid stress; activates a subset of the genes that are repressed by Nrg1
orf19.5753	C6_03790C_A	HGT10	STL1	NA	-0.953531	9.63051e-06	Glycerol permease involved in glycerol uptake; member of the major facilitator superfamily; induced by osmotic stress, at low glucose in rich media, during cell wall regeneration; 12 membrane spans; Hap43p-induced gene
orf19.2476	C1_05750C_A		ECM5	NA	0.563828	9.86091e-06	Protein of unknown function
orf19.6173	C3_07790W_A	STD1	MTH1	NA	-1.0813	9.96579e-06	Putative transcription factor; involved in control of glucose-regulated gene expression; repressed by Rgt1; Spider biofilm induced
orf19.5112	C1_08320W_A	TKL1	NA	NA	-1.07621	1.003e-05	Putative transketolase; localizes to surface of yeast cells, not hyphae; soluble protein in hyphae; transcript regulated by Nrg1, Mig1, and Tup1; antigenic in human or murine infection; possibly essential (by UAU1 method)
orf19.6081	C1_00220W_A	PHR2	GAS1	NA	0.745058	1.007e-05	Glycosidase; role in vaginal not systemic infection (low pH not neutral); low pH, high iron, fluconazole, Hap43-induced; Rim101-repressed at pH8; rat catheter biofilm induced; Bcr1-repressed in RPMI a/a biofilms
orf19.333	C3_03360W_A	FCY2	NA	NA	-0.622356	1.01796e-05	Purine-cytosine permease of pyrimidine salvage; mutation associated with resistance to flucytosine in clinical isolates; transposon mutation affects filamentation; farnesol-upregulated in biofilm
orf19.7282	CR_08870W_A	PEX13	PEX13	NA	-0.630939	1.0237e-05	Protein required for peroxisomal protein import mediated by PTS1 and PTS2 targeting sequences; transcript induced in an RHE model of oral candidiasis; Hap43-repressed gene
orf19.7329	CR_09340W_A		UBC7	NA	-0.628997	1.02978e-05	Protein of unknown function
orf19.1235	C4_05540W_A	HOM3	HOM3	NA	0.865733	1.03472e-05	Putative L-aspartate 4-P-transferase; fungal-specific (no human or murine homolog); regulated by Gcn2 and Gcn4; early-stage flow model biofilm induced
orf19.4570	C4_02200C_A		NA	NA	1.19749	1.03684e-05	Protein of unknown function
orf19.2397.3	CR_03260W_A		YGR127W	NA	-0.853102	1.03968e-05	Putative aminotransferase; Hap43-repressed; homozygous Tn insertion decreases colony wrinkling in filament-inducing conditions, does not block true hypha formation in liquid media; rat catheter and Spider biofilm induced
orf19.776	C1_04690C_A		REC8	NA	-1.48639	1.04574e-05	Protein of unknown function
snR8b	C2_06560W_A		NA	NA	-1.59745	1.05157e-05	H/ACA box small nucleolar RNA (snoRNA)
orf19.3330	C1_01420C_A	CRL1	RHO4	NA	0.5857	1.05872e-05	Predicted GTPase of RHO family; CAAX motif geranylgeranylated; expression in S. cerevisiae causes dominant-negative inhibition of pheromone response
orf19.1678	C3_01660W_A		NA	NA	-0.51742	1.05901e-05	Protein of unknown function; transcript detected on high-resolution tiling arrays
orf19.5615	C6_03270C_A	AYR2	NA	NA	-0.917518	1.0631e-05	Putative NADPH-dependent 1-acyl dihydroxyacetone phosphate reductase; shows colony morphology-related gene regulation by Ssn6p
orf19.6900	C7_01180W_A	MDM12	MDM12	NA	0.593138	1.07325e-05	Protein of unknown function
orf19.2044	C2_00800C_A	PGA27	NA	NA	1.18005	1.07699e-05	Putative GPI-anchored protein
orf19.11	CR_07140C_A		NA	NA	-1.3133	1.1218e-05	Protein of unknown function; transcript regulated by Mig1 and Tup1; rat catheter biofilm induced
orf19.7514	CR_00200W_A	PCK1	PCK1	NA	-1.62487	1.16756e-05	Phosphoenolpyruvate carboxykinase; glucose, C-source, yeast-hypha, Hap43 regulated; fluconazole, phagocytosis, H2O2, oral candidasis, Spider/rat catheter/flow model biofilm induced; repressed in biofilm by Bcr1, Tec1, Ndt80, Rob1, Brg1
orf19.7223	C1_14160W_A		RKM3	NA	0.913039	1.22186e-05	Protein of unknown function
orf19.6805	C3_06950W_A		YDR089W	NA	0.84332	1.22778e-05	Protein of unknown function; Spider biofilm induced
orf19.5811	C2_02940W_A	MET1	MET1	NA	-0.656431	1.23287e-05	Putative uroporphyrin-3 C-methyltransferase, methionine biosynthesis enzyme; upregulated by human whole blood or polymorphonuclear (PMN) cells; Hog1p-induced; fungal-specific (no human or murine homolog); Hap43p-repressed
orf19.6116	CR_07490C_A	GLK4	NA	NA	-0.882899	1.24773e-05	Putative glucokinase; decreased expression in hyphae compared to yeast-form cells
orf19.1570	C2_02460W_A	ERG7	ERG7	NA	-0.970958	1.25454e-05	2,3-epoxysqualene-lanosterol cyclase (lanosterol synthase), conversion of 2,3-oxidosqualene to lanosterol in sterol biosynthesis; fluconazole-induced; possibly essential, disruptants not obtained by UAU1 method; rat catheter biofilm induced
orf19.3929	C5_04420W_A		AIM25	NA	0.545386	1.25859e-05	Protein of unknown function
orf19.2948	C1_02600W_A	SNO1	SNO1	NA	-1.23858	1.26138e-05	Protein with a predicted role in pyridoxine metabolism; stationary phase protein; regulated by Tup1, Efg1; Spider biofilm induced
orf19.3057	C1_03540C_A		ILM1	NA	0.750089	1.26458e-05	Protein of unknown function
orf19.1691	C3_01540W_A		NA	NA	-1.57693	1.29147e-05	Plasma-membrane-localized protein; filament induced; Hog1, ketoconazole, fluconazole and hypoxia-induced; regulated by Nrg1, Tup1, Upc2; induced by prostaglandins; flow model biofilm induced; rat catheter and Spider biofilm repressed
orf19.3330.3	C1_01440C_A	POX18	NA	NA	1.46085	1.35057e-05	Similar to Pox18, a peroxisomal protein; induced during chlamydospore formation in C. albicans and C. dubliniensis; A21 sequence updated based on new sequence and analysis, the allelic orf19.10841 was reinstated; Spider biofilm induced
orf19.4311	C5_02890W_A	YNK1	YNK1	NA	0.71504	1.35057e-05	Nucleoside diphosphate kinase (NDP kinase); homo-hexameric; soluble protein in hyphae; flucytosine induced; biofilm induced; macrophage-induced protein; stationary phase enriched protein; Spider biofilm repressed
orf19.7466	CR_00640W_A	ACC1	NA	NA	-1.07258	1.36849e-05	Putative acetyl-coenzyme-A carboxylases; regulated by Efg1; amphotericin B repressed; caspofungin repressed; 5'-UTR intron; gene used for strain identification by multilocus sequence typing; Hap43-induced; flow model biofilm repressed
orf19.6165	C3_00880W_A	KGD1	NA	NA	-1.12719	1.37618e-05	Putative 2-oxoglutarate dehydrogenase; regulated by Efg1 under yeast but not hyphal growth conditions; transcript induced in an RHE model of oral candidiasis; stationary phase enriched protein; Hap43-repressed; rat catheter biofilm induced
orf19.1191	C6_00310W_A		NA	NA	-0.689164	1.37812e-05	Protein of unknown function
orf19.2168.3	C2_08160C_A		YOP1	NA	-1.06886	1.38167e-05	Protein of unknown function
orf19.6112	C1_00040W_A	CTA2	NA	NA	-0.635419	1.38167e-05	Putative transcription factor; Med2 mediator domain; activates transcription in 1-hybrid assay in S. cerevisiae; repressed by Efg1; member of a family of telomere-proximal genes; Tbf1-induced
orf19.7457	C3_06680C_A		NA	NA	0.843616	1.3854e-05	Protein with Mob2p-dependent hyphal regulation
orf19.779	C1_04670W_A	HAT1	HAT1	NA	-0.652957	1.39128e-05	Hat1-Hat2 histone acetyltransferase complex subunit; involved in DNA damage repair and morphogenesis; mutations cause constitutive pseudohyphal growth, white to opaque switch, caspofungin sensitivity; rat catheter, Spider biofilm repressed
orf19.6306	CR_04870C_A		NA	NA	1.3555	1.3926e-05	Trimethylaminobutyraldehyde dehydrogenase, the third enzyme of the carnitine biosynthesis pathway
orf19.6604	CR_09580C_A		PBA1	NA	-0.8847	1.39497e-05	Ortholog of S. cerevisiae Pba1 that is involved in 20S proteasome assembly; upregulated in a cyr1 null mutant; contains a 5' UTR intron
orf19.391	C1_08460C_A	UPC2	UPC2	NA	-0.756686	1.41898e-05	Zn2-Cys6 transcript factor; regulator of ergosterol biosynthetic genes and sterol uptake; binds ERG2 promoter; induced by ergosterol depletion, by azoles, anaerobicity; macrophage/pseudohyphal-repressed; flow model biofilm induced
orf19.4357	CR_03860C_A		MGR3	NA	-1.01231	1.45798e-05	Putative protein similar to S. cerevisiae Mgr3p, a subunit of the i-AAA protease supercomplex that degrades misfolded mitochondrial proteins
orf19.2397	CR_03270W_A		NA	NA	-0.710499	1.47155e-05	Predicted membrane transporter, member of the anion:cation symporter (ACS) family, major facilitator superfamily (MFS); amphotericin B, caspofungin repressed; Hap43p-repressed
orf19.400	C1_08550C_A	GCF1	NA	NA	-0.420012	1.48928e-05	HMG box mitochondrial protein; binds to mt DNA and the HWP1 promoter; mutant phenotype and functional complementation of an S. cerevisiae abf2 mutation suggest role in mt genome replication, maintenance; flow and Spider biofilm repressed
orf19.7446	C3_06570C_A	OPI3	OPI3	NA	-0.755857	1.48928e-05	Phosphatidylethanolamine N-methyltransferase; phosphatidylcholine biosynthesis; downregulation correlates with clinical development of fluconazole resistance; amphotericin B, caspofungin repressed; Hap43-induced; Spider biofilm repressed
orf19.6225.1	C1_06840C_A		PET117	NA	-0.77802	1.48935e-05	Protein of unknown function
orf19.2837	CR_02790C_A	ALG5	ALG5	NA	-0.724717	1.49736e-05	Putative glucosyltransferase involved in cell wall mannan biosynthesis; possibly an essential gene, disruptants not obtained by UAU1 method
orf19.7281	CR_08860W_A	PDK2	PKP1	NA	-0.79933	1.5017e-05	Putative pyruvate dehydrogenase kinase; mutation confers hypersensitivity to amphotericin B
orf19.1792	C4_05340W_A		CDC16	NA	0.738678	1.51365e-05	Protein of unknown function
orf19.5522	C6_02530C_A		NA	NA	-1.14884	1.51811e-05	Protein of unknown function
orf19.1760	C2_10210C_A	RAS1	RAS1	NA	-0.422574	1.52269e-05	RAS signal transduction GTPase; regulates cAMP and MAP kinase pathways; role in hyphal induction, virulence, apoptosis, heat-shock sensitivity; nonessential; plasma membrane-localized; complements viability of S. cerevisiae ras1 ras2 mutant
orf19.4921.1	C1_12910W_A		NA	NA	-1.97281	1.54906e-05	Protein of unknown function; Spider biofilm repressed
orf19.5288	CR_05340C_A	IFE2	NA	NA	-1.22578	1.55208e-05	Putative alcohol dehydrogenase; yeast-enriched transcript; Efg1-regulated; induced by prostaglandins, Hog1, fluconazole; rat catheter biofilm induced
orf19.3575	C2_05460W_A	CDC19	CDC19	NA	-0.731747	1.55582e-05	Pyruvate kinase at yeast cell surface; Gcn4/Hog1/GlcNAc regulated; Hap43/polystyrene adherence induced; repressed by phagocytosis/farnesol; hyphal growth role; stationary phase enriched; flow model biofilm induced; Spider biofilm repressed
orf19.4890	C1_10210C_A	CLA4	CLA4	NA	0.992958	1.56776e-05	Ste20p family Ser/Thr kinase required for wild-type filamentous growth, organ colonization and virulence in mouse systemic infection; role in chlamydospore formation; functional homolog of S. cerevisiae Cla4p; mutant caspofungin sensitive
orf19.3429	C6_01570C_A	FGR47	NA	NA	0.686816	1.5818e-05	Protein lacking an ortholog in S. cerevisiae; transposon mutation affects filamentous growth
orf19.4097	C2_09360W_A		NA	NA	0.705513	1.58813e-05	Protein of unknown function
orf19.2978	C1_02890C_A		NA	NA	-0.747415	1.6223e-05	Protein of unknown function; Hap43-repressed gene
orf19.4286	C5_02680W_A		NA	NA	-0.898748	1.6337e-05	Protein of unknown function; flow model biofilm induced; Spider biofilm induced
orf19.671	C1_11310C_A	PSP1	NA	NA	-0.682828	1.67227e-05	Protein repressed during the mating process
orf19.7549	CR_09770C_A	PMT5	PMT7	NA	0.439167	1.67446e-05	Protein mannosyltransferase (PMT), expressed at extremely low levels; not required for wild-type hyphal growth, drug resistance, or virulence in mouse systemic infection; one of five PMT family members
orf19.1342	C7_03330C_A	SHM1	SHM1	NA	-0.563716	1.67488e-05	Mitochondrial serine hydroxymethyltransferase; complements the glycine auxotrophy of an S. cerevisiae shm1 null shm2 null gly1-1 triple mutant; protein present in exponential and stationary growth phase yeast cultures
orf19.7279	CR_08840C_A	NIT2	NIT2	NA	-0.911895	1.71011e-05	Putative carbon-nitrogen hydrolase; rat catheter biofilm repressed
orf19.1662	C3_01850W_A		MRP1	NA	1.34109	1.71874e-05	Protein of unknown function
orf19.1221	C6_04030W_A	ALG2	ALG2	NA	0.430735	1.7246e-05	Putative mannosyltransferase involved in cell wall mannan biosynthesis; transcription is elevated in chk1, nik1, and sln1 homozygous null mutants
orf19.3519	CR_05490W_A	SUA72	NA	SUA7	0.823256	1.75979e-05	Predicted transcription factor; induced during planktonic growth, whereas related SUA71 is downregulated
orf19.7205	C1_13980C_A	DUR7	NA	NA	0.815985	1.75979e-05	Putative urea transporter; fungal-specific (no human or murine homolog)
orf19.2573	CR_01760C_A	FRS1	FRS1	NA	-0.478201	1.76221e-05	Phenylalanyl-tRNA synthetase; possible role in early cell wall biosynthesis; downregulated by phagocytosis by macrophages; possibly essential gene, disruptants not obtained by UAU1 method; protein present in exponential and stationary phase
orf19.6966	C3_05300C_A		CKI1	NA	-0.505637	1.76221e-05	Protein of unknown function
orf19.880	C2_03410W_A		SFB3	NA	-0.562045	1.76612e-05	Protein of unknown function
orf19.3934	C5_04490C_A	CAR1	CAR1	NA	0.762239	1.79893e-05	Arginase; arginine catabolism; transcript regulated by Nrg1, Mig1, Tup1; colony morphology-related regulation by Ssn6; alkaline induced; protein decreased in stationary phase; sumoylation target; flow model biofilm induced
orf19.5595	C6_03100W_A	SHE3	SHE3	NA	0.514636	1.85791e-05	mRNA-binding protein that localizes specific mRNAs to daughter yeast cells and to hyphal tips; required for normal filamentation and host epithelial cell damage; ortholog of S. cerevisiae She3 but target mRNAs differs
orf19.5915	C3_04570C_A	DUR35	NA	NA	2.7319	1.89503e-05	Putative urea transporter
orf19.5918	C3_04600C_A		NA	NA	-0.593409	1.89765e-05	Protein of unknown function
orf19.7082	C7_00380W_A		PET8	NA	0.700178	1.90043e-05	S-adenosylmethionine transporter of the mitochondrial inner membrane; mitochondrial carrier family; predicted role in biotin biosynthesis and respiratory growth; Spider biofilm repressed
orf19.5858	C3_04140C_A	EGD2	EGD2	NA	-0.641234	1.90583e-05	Nascent polypeptide associated complex protein alpha subunit; soluble protein in hyphae; macrophage/pseudohyphal-induced; protein level decrease in stationary phase cultures; GlcNAc-induced protein; Spider biofilm repressed
orf19.1714	C3_01370C_A	PGA44	NA	NA	1.65142	1.90668e-05	Putative GPI-anchored protein
orf19.4755	C1_08990C_A	KEX2	KEX2	NA	0.346271	1.94859e-05	Subtilisin-like protease (proprotein convertase); processes aspartyl proteinase Sap2; required for hyphal growth and wild-type virulence in mice; functional homolog of S. cerevisiae Kex2, which processes alpha-factor; Tup1-repressed
orf19.643	CR_05100W_A		BIR1	NA	0.736428	1.95717e-05	Protein of unknown function
orf19.5698	C5_00030W_A		MRPL1	NA	0.674711	1.95981e-05	Putative mitochondrial ribosomal protein of the large subunit; transcript is upregulated in clinical isolates from HIV+ patients with oral candidiasis; Spider biofilm repressed
orf19.2446	C1_05990C_A		YDL144C	NA	0.877564	1.9617e-05	Protein of unknown function
orf19.3508	C6_02030C_A		YKL151C	NA	-0.879881	1.97374e-05	Putative protein of unknown function; stationary phase enriched protein
orf19.7531	CR_00090C_A		YMR090W	NA	0.935848	1.97892e-05	Protein of unknown function; stationary phase enriched protein; induced upon yeast-hypha transition; benomyl or caspofungin induced; Hap43-repressed; Spider biofilm induced
orf19.1539	C2_02220C_A		NA	NA	1.94873	1.98605e-05	Protein of unknown function; F-12/CO2 early biofilm induced
orf19.6398	CR_08310C_A		NA	NA	1.4159	2.0016e-05	S. pombe ortholog SPBC460.04c is a predicted sulfonate/alpha-ketoglutare dioxygenase; induced by nitric oxide; Spider biofilm induced
orf19.4624	C4_01690C_A	HRT2	YMR027W	NA	-1.2091	2.01205e-05	Protein described as having a role in Ty3 transposition; repressed in hyphae; stationary phase enriched protein; rat catheter and Spider biofilm repressed
orf19.1229	C1_07690C_A		CSE1	NA	-0.598708	2.0148e-05	Protein of unknown function
orf19.6059	C1_00490C_A	TTR1	GRX2	NA	-1.08574	2.0218e-05	Putative glutaredoxin; described as a glutathione reductase; induced by human neutrophils and benomyl treatment; alkaline repressed; regulated by Gcn2 and Gcn4; required for virulence in mouse model; Spider biofilm induced
orf19.7264	C1_14460W_A		RPN11	NA	-0.696095	2.0326e-05	Metalloprotease subunit of the 19S regulatory particle of the 26S proteasome lid; couples the deubiquitination and degradation of proteasome substrates; role in fission of mitochondria and peroxisome; Spider biofilm repressed
orf19.7251	C1_14360C_A	WSC4	WSC4	NA	-0.637854	2.06651e-05	Putative cell wall integrity and stress response subunit 4 precursor; transcription is specific to white cell type
orf19.1523	C2_02060C_A	FMO1	NA	NA	2.29173	2.08012e-05	Putative oxidoreductase; mutation confers hypersensitivity to toxic ergosterol analog, and to amphotericin B
orf19.7324	CR_09290W_A	THI13	NA	NA	-0.716188	2.1188e-05	Thiamin pyrimidine synthase; synthesis of the thiamine precursor hydroxymethylpyrimidine phosphate; single-turnover enzyme that provides histidine for HMP-P formation; induced by nitric oxide independent of Yhb1; Spider biofilm induced
orf19.980	C5_00180W_A	AFL1	VIP1	NA	-0.801669	2.12264e-05	Protein of unknown function
orf19.5000	C1_13630W_A	CYB2	CYB2	NA	1.45336	2.14791e-05	Putative cytochrome b2 precursor; induced in high iron; alkaline repressed; colony morphology-related gene regulation by Ssn6; Hap43-repressed; pider biofilm induced
orf19.6855	C1_04620W_A		NA	NA	0.554266	2.18633e-05	Protein of unknown function
orf19.4072	C2_09130C_A	IFF6	NA	NA	0.81943	2.18711e-05	Putative GPI-anchored adhesin-like protein; opaque-specific transcript; macrophage-induced gene; Hap43-repressed gene; Spider biofilm induced
orf19.6447	CR_08700C_A	ARF1	NA	NA	-1.0665	2.22198e-05	ADP-ribosylation factor; probable GTPase involved in intracellular transport; one of several C. albicans ADP-ribosylation factors; N-myristoylprotein; substrate of Nmt1; Spider biofilm induced
orf19.6220.3	C1_06900C_A	MMD1	MMF1	NA	-0.49345	2.22401e-05	Mitochondrial protein; possibly required for transamination of isoleucine; macrophage-downregulated protein abundance; rat catheter and Spider biofilm repressed
orf19.4761	C1_09050W_A	HST1	HST1	NA	0.534552	2.22978e-05	Putative histone deacetylase, involved in regulation of white-opaque switching
orf19.4827	C1_09640W_A	ADE12	ADE12	NA	-0.47972	2.25156e-05	Adenylosuccinate synthase; upregulated in biofilm; decreased expression in hyphae vs yeast-form cells; not induced during GCN response, in contrast to S. cerevisiae ADE12, which is induced by Gcn4p; stationary phase-enriched protein
orf19.2268	C2_07130C_A	RCK2	RCK2	NA	-0.960755	2.31586e-05	Predicted MAP kinase-activated protein kinase, similar to S. cerevisiae serine/threonine protein kinase Rck2p; induced by osmotic stress via Hog1p; macrophage/pseudohyphal-repressed; mutants are sensitive to rapamycin
orf19.5059	C1_07880C_A	GCS1	NA	NA	-0.595074	2.32806e-05	Gamma-glutamylcysteine synthetase; glutathione synthesis, required for virulence;induced in low iron, H2O2, Cd, or presence of human neutrophils; possibly adherence-induced; Spider and F-12/CO2 biofilm induced
orf19.6376	CR_08160W_A	PTC5	PTC5	NA	-0.61237	2.32806e-05	Mitochondrial protein phosphatase of the Type 2C-related family (serine/threonine-specific), involved in drug response and cadmium tolerance
orf19.2129	C6_04440C_A		SPO71	NA	0.777507	2.34049e-05	Ortholog of S. cerevisiae Spo71; a meiosis-specific protein required for spore wall formation during sporulation in S. cerevisiae; possibly an essential gene, disruptants not obtained by UAU1 method
orf19.1279	C5_04100W_A	CDS1	CDS1	NA	-0.686584	2.35133e-05	Protein similar to S. cerevisiae Cds1p; transposon mutation affects filamentous growth
orf19.780	C1_04660W_A	DUR1,2	DUR1,2	NA	1.37253	2.35245e-05	Urea amidolyase; hydrolyzes urea to CO2; use of urea as N source and for hyphal switch in macrophage; regulated by Nrg1/Hap43; required for virulence; promotes mouse kidney and brain colonization; rat catheter and flow model biofilm induced
orf19.5140	C7_03150W_A		NA	NA	1.15882	2.37961e-05	Protein of unknown function; rat catheter and Spider biofilm induced
orf19.1613	C3_02320W_A	ILV2	ILV2	NA	-0.668228	2.45964e-05	Putative acetolactate synthase; regulated by Gcn4p; induced by amino acid starvation (3-AT treatment); stationary phase enriched protein
orf19.1591	C2_04310W_A	ERG10	ERG10	NA	-1.16604	2.48029e-05	Acetyl-CoA acetyltransferase; role in ergosterol biosynthesis; soluble in hyphae; changes in protein abundance associated with azole resistance; fluconazole or ketoconazole induced; macrophage-downregulated protein; GlcNAc-induced protein
orf19.6458	C7_02520W_A		NA	NA	-0.645386	2.48029e-05	Protein of unknown function
orf19.4753	C1_08950W_A	PFK26	PFK26	NA	-0.608803	2.48409e-05	Putative 6-phosphofructo-2-kinase; protein repressed during the mating process
orf19.4511	C2_04410W_A		NA	NA	0.979334	2.50403e-05	Protein of unknown function
orf19.3292	C1_01040W_A		MXR2	NA	1.04012	2.52434e-05	Protein of unknown function
orf19.69.2	C1_12460C_A		NA	NA	0.950872	2.52434e-05	Dubious open reading frame
orf19.6100	C1_00100C_A		CRD1	NA	0.873743	2.54592e-05	Cardiolipin synthase; ortholog of S. cerevisiae Crd1; transcript is upregulated in clinical isolates from HIV+ patients with oral candidiasis; mutants are viable; Spider biofilm repressed
orf19.6011	C1_00930C_A	SIN3	SIN3	NA	-0.665593	2.55675e-05	Protein similar to S. cerevisiae Sin3p (transcriptional corepressor involved in histone deacetylase recruitment); has paired amphipathic helix PAH1 domain; interacts with ScOpi1p, not CaOpi1p; transposon mutation affects filamentous growth
orf19.1770	C2_10110W_A	CYC1	CYC1	NA	-0.794819	2.62806e-05	Cytochrome c; complements defects of S. cerevisiae cyc1 cyc7 double mutant; induced in high iron; alkaline repressed; repressed by nitric oxide; Hap43-dependent repression in low iron; regulated by Sef1, Sfu1
orf19.1034	C1_03750W_A		NA	NA	-1.1459	2.62941e-05	Protein with a predicted cytochrome b5-like Heme/Steroid binding domain; Hap43, caspofungin repressed; flow model biofilm induced
orf19.4182	C4_00610W_A		TDA5	NA	0.626544	2.64112e-05	Protein of unknown function
orf19.6462	C7_02470C_A		EMC3	NA	-0.535381	2.64112e-05	Protein of unknown function
orf19.3099	C4_07090C_A	TRP4	TRP4	NA	0.604288	2.66292e-05	Predicted enzyme of amino acid biosynthesis; upregulated in biofilm; regulated by Gcn2p and Gcn4p; S. cerevisiae ortholog is Gcn4p regulated
orf19.5949	C3_04830C_A	FAS2	FAS2	NA	-1.37475	2.69802e-05	Alpha subunit of fatty-acid synthase; required for virulence in mouse systemic infection and rat oropharyngeal infection models; regulated by Efg1; fluconazole-induced; amphotericin B repressed; flow model and Spider biofilm repressed
orf19.1510	C2_01980C_A	SRD1	YOL019W	NA	0.765487	2.71883e-05	Sur7 family protein with PalI-like domains; not required for stress responses; mutant is viable
orf19.6580	C7_01490W_A		NA	NA	-0.621736	2.7239e-05	Protein of unknown function; Spider biofilm induced
orf19.8	CR_07110C_A		NA	NA	-1.09343	2.73188e-05	Protein of unknown function
orf19.2870	C4_06620C_A		NA	NA	-1.29408	2.73724e-05	Protein of unknown function; rat catheter and Spider biofilm induced
orf19.2241	C2_06870C_A	PST1	NA	NA	-0.99046	2.74152e-05	Putative 1,4-benzoquinone reductase; hyphal-induced; regulated by Cyr1, Ras1, Efg1, Nrg1, Rfg1, Tup1; Hap43-induced; Spider biofilm induced
orf19.5387	C3_00700W_A	VPS8	VPS8	NA	0.52809	2.7674e-05	Putative vacuolar sorting protein; downregulated upon adherence to polystyrene
orf19.3649	C6_00760W_A		FES1	NA	-0.47449	2.86274e-05	Protein of unknown function
orf19.1144	C1_11730W_A		NA	NA	0.718266	2.87755e-05	Protein with SEL-1 like protein domain; early-stage flow model biofilm induced
orf19.6307	CR_04860C_A		NA	NA	0.580103	2.89365e-05	Protein of unknown function
orf19.6747	C3_07430W_A		DET1	NA	-0.720433	2.90194e-05	Protein of unknown function
orf19.1381	C2_09710C_A		LSB5	NA	-0.7592	2.93076e-05	Ortholog of S. cerevisiae/S. pombe Lsb5; predicted role in actin cortical patch localization, actin filament organization, endocytosis; flow model biofilm induced; Spider biofilm repressed
orf19.1440.2	C4_03300C_A		NA	NA	-1.02054	2.93432e-05	Protein of unknown function
orf19.2727	C4_02710C_A	GRX3	NA	NA	-0.58713	2.96814e-05	Putative glutaredoxin; flucytosine induced; regulated by Gcn4p; repressed in response to amino acid starvation (3-aminotriazole treatment)
orf19.2968	C1_02800W_A		NA	NA	-0.765005	3.00136e-05	Protein of unknown function; Spider biofilm induced
orf19.2269	C2_07140W_A		YNL010W	NA	-1.09775	3.0139e-05	Putative 3-phosphoserine phosphatase; induced by benomyl or in azole-resistant strain that overexpresses MDR1; early-stage flow model biofilm induced; Spider biofilm repressed
orf19.347	C3_03490W_A	RSN1	NA	NA	-0.896935	3.02185e-05	Protein of unknown function; flow model biofilm induced; Spider biofilm induced; induced during the mating process; Hap43-repressed
orf19.3648	C6_00770C_A		MMS4	NA	-0.60681	3.02962e-05	Protein of unknown function
orf19.4988	C1_13560W_A		SAE2	NA	0.785049	3.03273e-05	S. cerevisiae ortholog Sae2 is an endonuclease that processes hairpin DNA structures with the MRX complex, involved in meiotic and mitotic double-strand break repair; upregulated in a cyr1 null mutant
orf19.5851	CR_05510W_A	STE13	STE13	NA	0.556899	3.07666e-05	Putative pheromone-processing dipeptidyl aminopeptidase; possible Kex2 substrate; transposon mutation affects filamentous growth; induced by low nitrogen, germ tube formation; flow model biofilm repressed
orf19.5444	C3_00250C_A	TIM44	TIM44	NA	1.19814	3.1317e-05	Protein involved in transport across membranes; Spider biofilm repressed
orf19.3263	CR_00930W_A	ATO10	NA	NA	-1.07715	3.14844e-05	Putative fungal-specific transmembrane protein; rat catheter and Spider biofilm induced
orf19.2076	C2_00510W_A		YMR130W	NA	-0.428234	3.17689e-05	Protein of unknown function; S. pombe ortholog SPAC7D4.05 encodes a predicted hydrolase; Hap43-repressed; Spider biofilm induced
orf19.3147	C2_06750C_A		NA	NA	-0.697855	3.17689e-05	Protein of unknown function
orf19.3810	C4_04720W_A		MTD1	NA	-1.39327	3.18283e-05	Protein of unknown function
orf19.5748	C6_03740W_A		NA	NA	-0.819063	3.19173e-05	Protein of unknown function
orf19.7296	CR_08990C_A		NA	NA	-1.0618	3.19368e-05	Putative cation conductance protein; similar to stomatin mechanoreception protein; plasma-membrane localized; induced by Rgt1; rat catheter and Spider biofilm induced
orf19.4444	C1_07230W_A	PHO15	PHO13	NA	-0.727669	3.21289e-05	4-nitrophenyl phosphatase, possible histone H2A phosphatase; involved in regulation of white-opaque switch; hyphal repressed; induced in core stress response; induced by cadmium stress via Hog1; rat catheter and Spider biofilm repressed
orf19.2281	C2_07240C_A		NA	NA	0.935539	3.2322e-05	Protein of unknown function
orf19.178	CR_06930W_A		NA	NA	-0.827331	3.24808e-05	Protein of unknown function
orf19.7436	C3_06470W_A	AAF1	NA	NA	1.10742	3.2569e-05	Possible regulatory protein; possible adhesin-like; Glu-rich domain; production in S. cerevisiae increases endothelial cell adherence and flocculence; flow model biofilm, alkaline or caspofungin induced
orf19.2077	C2_00500W_A	ZCF9	NA	NA	0.525607	3.31126e-05	Putative Zn(II)2Cys6 transcription factor; hypersensitive to toxic ergosterol analog ECC69 and/or ECC1384
orf19.2929	C1_02420C_A	GSC1	NA	NA	0.455375	3.34632e-05	Essential beta-1,3-glucan synthase subunit; gsc1 allele determines resistance/sensitivity to echinocandins; 16 predicted membrane-spanning regions; mRNA abundance declines after yeast-to-hypha transition; Spider biofilm induced
orf19.5280	C1_11870W_A	MUP1	MUP1	NA	-0.786121	3.38118e-05	Putative high affinity methionine permease; alkaline upregulated by Rim101; Spider biofilm induced
orf19.3694	C1_02370C_A		NA	NA	0.697369	3.42149e-05	Protein of unknown function
snR67	C1_07940W_A		NA	NA	-1.2539	3.42897e-05	C/D box small nucleolar RNA (snoRNA)
orf19.2846	CR_02880W_A		NA	NA	0.729037	3.46657e-05	Protein of unknown function; Hap43-repressed; induced in core caspofungin response; regulated by yeast-hypha switch; Spider biofilm repressed
orf19.4306	C5_02820C_A		MDE1	NA	0.811695	3.52745e-05	Protein of unknown function
orf19.3672	C1_02150W_A	GAL10	GAL10	NA	-0.85817	3.52834e-05	UDP-glucose 4-epimerase; galactose utilization; mutant has cell wall defects and increased filamentation; GlcNAc-, fluconazole- and ketoconazole-induced; stationary phase enriched protein; rat catheter and flow model biofilm induced
orf19.2309	C1_11070W_A	PET127	NA	NA	0.784002	3.67253e-05	Protein with a predicted role in 5'-end processing of mitochondrial RNAs; ortholog of S. cerevisiae Pet127; Hap43-induced; rat catheter and Spider biofilm induced
orf19.7111	C7_00120W_A		FIS1	NA	0.794331	3.78831e-05	Putative mitochondrial outer membrane protein membrane fission effector; possibly an essential gene, disruptants not obtained by UAU1 method
orf19.4171	C4_00710W_A		NA	NA	0.650182	3.80181e-05	Protein of unknown function
orf19.5070	C1_07990C_A		NA	NA	-1.36723	3.8495e-05	Similar to cell-wall mannoproteins; induced in low iron; induced in cyr1 homozygous null; regulated by osmotic and oxidative stress via Hog1; Spider biofilm induced
orf19.7221	C1_14140C_A	SET3	SET3	NA	-1.70141	3.85708e-05	NAD-dependent histone deacetylase; mutations affect filamentous growth; genetic evidence suggests Set3/Hos2 function as a complex to regulate white-opaque switching, morphogenesis, and virulence; flow model biofilm induced
orf19.5090	C1_08140W_A		TAD3	NA	0.48371	3.88349e-05	Protein of unknown function
orf19.2347	C1_10720C_A	MNN2	NA	NA	0.659971	3.89162e-05	Alpha-1,2-mannosyltransferase; similar to S. cerevisiae Mnn2; role in cell wall integrity, temperature sensitivity; iron utilization in low iron; Tn mutation affects filamentous growth; filament induced; increased chitin exposes beta-glucan
orf19.896	C2_03320W_A	CHK1	NA	NA	1.05998	3.89162e-05	Histidine kinase; 2-component signaling, cell wall synthesis; hyphal growth defect; avirulent in mouse, not rat vaginal infection; phagocytosis rate increased; Spider biofilm induced; required for RPMI biofilm; Bcr1-induced in a/a biofilm
orf19.7319	CR_09210W_A	SUC1	MAL13	NA	-1.06715	3.91831e-05	Zinc-finger transcription factor; regulates alpha-glucosidase exression; complements S. cerevisiae suc2 for sucrose utilization and mal13 maltase defect; required for yeast cell adherence to silicone substrate; rat catheter biofilm induced
orf19.5365.1	C2_10830W_A		NA	NA	-0.675017	3.93937e-05	Protein of unknown function
orf19.900	C2_03280W_A	NSP1	NSP1	NA	-0.494989	3.93937e-05	Essential component of the nuclear pore complex; sumoylation target; stationary phase enriched protein; rat catheter biofilm repressed
orf19.2311	C1_11030W_A	RPL82	NA	RPL8B	-0.515891	3.94174e-05	Predicted ribosomal protein; genes encoding cytoplasmic ribosomal subunits, translation factors, and tRNA synthetases are downregulated upon phagocytosis by murine macrophage
orf19.6518	C7_02010C_A		NA	NA	1.41827	3.94174e-05	Predicted aldehyde dehydrogenase [NAD(P)+]; Spider biofilm induced
orf19.6527	C7_01940C_A		PRM10	NA	-0.714276	3.94174e-05	Pheromone-regulated protein (Prm10) of S. cerevisiae; colony morphology-related gene regulation by Ssn6; induced by Mnl1 under weak acid stress; possibly essential gene, disruptants not obtained by UAU1 method; Spider biofilm induced
orf19.6691	C7_03590C_A		NA	NA	-0.463097	4.0521e-05	Putative ember of the multi-drug and toxin extrusion (MATE) family of the multidrug/oligosaccharidyl-lipid/polysaccharide exporter superfamily; Spider biofilm induced
snR41	C1_12990W_A		NA	NA	-1.20599	4.14016e-05	C/D box small nucleolar RNA (snoRNA)
orf19.2313	C1_11010C_A		PEX32	NA	-0.680749	4.14413e-05	Putative ortholog of S. cerevisiae Pex32 a peroxisomal integral membrane protein with a role in negative regulation of peroxisome size; Hap43-repressed gene
orf19.5801	C2_03010C_A	RNR21	RNR2	NA	-0.7454	4.16056e-05	Ribonucleoside-diphosphate reductase; regulated by tyrosol and cell density; ciclopirox olamine, fluconazole or flucytosine induced; regulated by Sef1, Sfu1, and Hap43
orf19.4565	C4_02250C_A	BGL2	BGL2	NA	0.475158	4.19907e-05	Cell wall 1,3-beta-glucosyltransferase; mutant has cell-wall and growth defects, but wild-type 1,3- or 1,6-beta-glucan content; antigenic; virulence role in mouse systemic infection; rat catheter biofilm induced
orf19.5270	C1_11950W_A		NA	NA	0.753821	4.22254e-05	Protein of unknown function; rat catheter biofilm induced
orf19.6183	C3_07890W_A	TIM8	NA	NA	0.872755	4.25152e-05	Predicted mitochondrial intermembrane space protein with role in protein import into mitochondrial inner membrane and cytosol
orf19.6287	CR_07620W_A	AAT21	AAT2	NA	-0.818194	4.3076e-05	Putative aspartate aminotransferase; stationary phase enriched protein; Gcn4-regulated; Spider biofilm induced
orf19.3431	C6_01550C_A		MIP1	NA	0.629041	4.31908e-05	Protein of unknown function
snR17A	C3_04150W_A		NA	NA	-1.394	4.31908e-05	U3 small nucleolar RNA (snoRNA)
orf19.2023	C2_01000W_A	HGT7	NA	NA	-0.508277	4.43092e-05	Putative MFS glucose transporter; glucose, fluconazole, Snf3 induced, expressed at high glucose; 20 member C. albicans glucose transporter family; 12 TM regions predicted; flow model biofilm induced; Spider biofilm repressed
orf19.6982	C3_05440C_A		AIM23	NA	0.842868	4.44448e-05	Protein of unknown function
orf19.2304	C1_11120C_A		NA	NA	-0.581725	4.5123e-05	Protein similar to S. cerevisiae Gvp36p; transposon mutation affects filamentous growth
orf19.36	C2_06620W_A		COG8	NA	-1.18583	4.51537e-05	Component of the conserved oligomeric Golgi complex; predicted to mediate fusion of transport vesicles to Golgi compartments; clade-associated gene expression
orf19.7504	CR_00290W_A		RTS3	NA	1.21421	4.51537e-05	Ortholog of S. cerevisiae Rts3; a component of the protein phosphatase type 2A complex; Plc1-regulated; induced in core caspofungin response; Spider biofilm induced
orf19.6539	C7_01810W_A	RVB2	RVB2	NA	-0.584609	4.52633e-05	Putative trancription modulator; RuvB-like protein family member; heterozygous null mutant displays sensitivity to virgineone
orf19.3318	C1_01290C_A		MTC4	NA	-0.796932	4.65043e-05	Protein of unknown function
orf19.6470	C7_02390W_A	AHP2	NA	NA	-0.462148	4.67666e-05	Putative thiol-specific peroxiredoxin; macrophage-downregulated gene
orf19.7210	C1_14030W_A		MHO1	NA	0.870176	4.77865e-05	Protein of unknown function; Spider biofilm induced
orf19.6264.4	C1_06470W_A		RPL39	NA	-1.54167	4.78377e-05	Ortholog of S. cerevisiae Rpl39; a component of the 60S ribosomal subunit; Hap43-induced; Spider biofilm repressed
orf19.3517	CR_05460W_A		DSC3	NA	-0.955721	4.82242e-05	Protein of unknown function
orf19.7645	CR_10620C_A		BPL1	NA	0.660325	4.89872e-05	Biotin protein ligase; catalyzes covalent attachment of biotin to biotin-dependent enzymes including acetyl CoA carboxylase and pyruvate carboxylase
orf19.6689	C7_03570W_A	ARG4	ARG4	NA	-0.698508	4.94993e-05	Argininosuccinate lyase, catalyzes the final step in the arginine biosynthesis pathway; alkaline downregulated; flow model biofilm induced; Spider biofilm induced
orf19.4153	C5_01590W_A		ULA1	NA	-0.508894	4.95129e-05	Protein of unknown function
orf19.6254	C1_06570W_A	ANT1	ANT1	NA	1.15369	5.02077e-05	Peroxisomal adenine nucleotide transporter; role in beta-oxidation of medium-chain fatty acid and peroxisome proliferation; rat catheter biofilm induced
orf19.216	C2_08910C_A		NA	NA	0.467387	5.032e-05	Protein with a metallo-dependent phosphatase domain; ketoconazole-induced; upregulation correlates with clinical development of fluconazole resistance
orf19.6062.3	C1_00450C_A		MIC19	NA	0.568247	5.12612e-05	Mitochondrial protein; component of the mitochondrial inner membrane organizing system ; role in maintenance of crista junctions and inner membrane architecture; Spider biofilm repressed
orf19.5569	C6_02930W_A		SRC1	NA	-0.453208	5.21021e-05	Protein of unknown function
orf19.7048.1	C7_00710W_A	RPS28B	RPS28B	NA	-0.789779	5.21378e-05	Putative ribosomal protein S28B
orf19.257	C3_02650W_A		NA	NA	-0.887915	5.27608e-05	Transcription is negatively regulated by Sfu1p; repressed by nitric oxide
orf19.2046	C2_00780W_A	POT1-2	NA	POT1	-0.90607	5.33098e-05	Putative peroxisomal 3-ketoacyl CoA thiolase; Hap43-repressed
orf19.7269	C1_14500C_A		PAA1	NA	-0.765632	5.36695e-05	Putative polyamine acetyltransferase; acetylates polyamines (e.g. putrescine, spermidine, spermine) and aralkylamines (e.g. tryptamine, phenylethylamine); Spider biofilm repressed
orf19.5258	C1_12070C_A		NA	NA	0.846813	5.40728e-05	Protein of unknown function; induced by nitric oxide
orf19.5340	C2_10610W_A	GYP5	NA	NA	-0.5844	5.40728e-05	Putative Rab GTPase activator; role in ER to Golgi vesicle-mediated transport; Spider biofilm induced
orf19.4278	C5_02620C_A		NA	NA	0.511531	5.49556e-05	Protein of unknown function
orf19.7136	C7_04300W_A	SPT6	NA	NA	-0.668764	5.60836e-05	Putative transcription elongation factor; transposon mutation affects filamentous growth; transcript induced in an RHE model of oral candidiasis and in clinical isolates from oral candidiasis
orf19.7453	C3_06640W_A		NA	NA	1.11986	5.60836e-05	Protein of unknown function
orf19.2580	CR_01800C_A	HST2	HST2	NA	0.787287	5.6414e-05	Putative histone deacetylase; role in regulation of white-opaque switch; Spider biofilm induced
orf19.3770	C4_05070C_A	ARG8	ARG8	NA	0.689612	5.6865e-05	Putative acetylornithine aminotransferase; Gcn2, Gcn4 regulated; rat catheter biofilm induced; Spider biofilm induced
orf19.2463	C1_05860W_A	PRN2	NA	NA	0.895485	5.73473e-05	Protein similar to pirin; Hap43p-repressed gene
orf19.177	C1_06320W_A		NA	NA	0.920982	5.78419e-05	Protein of unknown function
orf19.5965	C3_04970C_A		UFD2	NA	-0.492434	5.83192e-05	Protein of unknown function
orf19.842	C2_03790C_A	ASR3	NA	NA	-0.877979	5.8461e-05	Adenylyl cyclase and stress responsive protein; induced in cyr1 or ras1 mutant; Spider biofilm induced
orf19.1828	C1_06210W_A	BUD16	BUD16	NA	-1.02432	5.87049e-05	Putative pyridoxal kinase; a key enzyme in pyridoxal 5'-phosphate synthesis, the active form of vitamin B6; involved in bud-site selection and genome integrity in S. cerevisiae; induced by alpha pheromone in SpiderM medium
orf19.3325	C1_01360C_A		GLG2	NA	-0.707539	5.91344e-05	Putative glycogen synthesis initiator; regulated by Efg1 and Efh1; Hog1-repressed; colony morphology-related gene regulation by Ssn6; induced by prostaglandins; flow model biofilm induced
orf19.5779	C2_03160C_A	RNR1	RNR1	NA	-0.744737	5.91344e-05	Ribonucleotide reductase large subunit; induced in low iron; transposon mutation affects filamentous growth; farnesol upregulated in biofilm; regulated by cell cycle, tyrosol, cell density; regulated by Sef1, Sfu1, and Hap43
orf19.1185	C6_00260W_A		DMA2	NA	-0.691166	5.96126e-05	Protein of unknown function
orf19.1435	C2_08370C_A	TEF1	NA	NA	-0.559854	5.98923e-05	Translation elongation factor 1-alpha; at cell surface; binds human plasminogen; macrophage/pseudohyphal-induced; induced in RHE model of oral candidiasis, in clinical oral candidiasis isolates; possibly essential; Spider biofilm repressed
orf19.7606	CR_10310W_A		NA	NA	1.57435	5.9907e-05	Protein of unknown function
orf19.1057	C1_04220C_A		NA	NA	-0.610624	5.99318e-05	Protein of unknown function
orf19.4861	C1_09930W_A		NA	NA	1.2027	6.02466e-05	Protein of unknown function; rat catheter biofilm repressed
orf19.4366	CR_03670W_A		NA	NA	2.06213	6.14862e-05	Protein of unknown function
orf19.2251	C2_06970W_A	AAH1	AAH1	NA	1.6058	6.20949e-05	Adenine deaminase; purine salvage and nitrogen catabolism; colony morphology-related regulation by Ssn6; Hog1, CO2-induced; chlamydospore formation repressed in C. albicans and C. dubliniensis; rat catheter and F-12/CO2 biofilm induced
orf19.5508	C7_03690W_A		NA	NA	0.838237	6.20949e-05	Protein of unknown function
snR60	C1_05550C_A		NA	NA	-1.93113	6.21865e-05	C/D box small nucleolar RNA (snoRNA)
orf19.1409.3	C4_04400C_A		NA	NA	-1.49402	6.29171e-05	Protein of unknown function; Spider biofilm induced
orf19.6809	C3_06920W_A		NA	NA	-1.00152	6.346e-05	Putative phosphomutase-like protein; protein present in exponential and stationary growth phase yeast; Hap43-repressed; Spider biofilm repressed
orf19.3219	C5_03930C_A		SIA1	NA	0.688369	6.5278e-05	Ortholog of S. cerevisiae Sia1; involved in activation of the Pma1 plasma membrane H+-ATPase by glucose in S. cerevisiae; Spider biofilm induced
snR18	C4_04490C_A		NA	NA	-1.18928	6.53033e-05	C/D box small nucleolar RNA (snoRNA); snR18 is encoded within the intron of orf19.3838/EFB1
orf19.2655	C5_03240W_A	BUB3	BUB3	NA	-0.911493	6.55779e-05	Protein similar to S. cerevisiae Bub3; a kinetochore checkpoint component; induced by hydroxyurea treatment; flow model biofilm induced; Spider biofilm induced
orf19.4914	C1_12840W_A		NA	NA	-1.16452	6.64901e-05	Protein of unknown function
orf19.5078	C1_08060W_A	OFR1	NA	NA	-1.16826	6.66456e-05	Protein of unknown function; Hap43-repressed gene; rat catheter biofilm repressed
orf19.527	CR_04370W_A		NA	NA	0.639893	6.68227e-05	Protein of unknown function; flow model biofilm induced
orf19.1940	C5_01290C_A		CAT5	NA	-0.428551	6.73833e-05	Protein of unknown function
orf19.1762	C2_10190C_A	OCA1	OCA1	NA	-0.50707	6.88985e-05	Putative protein phosphatase of the PTP family (tyrosine-specific); ortholog of S. cerevisiae Oca1; mutant is viable; mutant shows virulence defect
orf19.246	C3_02570W_A		YIL108W	NA	1.14084	6.89829e-05	Predicted metalloendopeptidase; Spider biofilm induced
orf19.685	C6_01930W_A	YHM1	GGC1	NA	0.566145	6.94912e-05	Putative mitochondrial carrier protein; fungal-specific (no human or murine homolog); Hap43p-repressed gene
orf19.2433	C1_06120C_A		NA	NA	-0.886596	6.98092e-05	Protein of unknown function
orf19.5134	C7_03210W_A		NA	NA	0.684264	6.99404e-05	Protein of unknown function
orf19.5166	C7_02950C_A	DBF4	DBF4	NA	0.713497	7.06198e-05	Putative Cdc7p-Dbf4p kinase complex regulatory subunit; Hap43p-induced gene; macrophage/pseudohyphal-repressed; cell-cycle regulated periodic mRNA expression; S. cerevisiae ortholog is not cell-cycle regulated
orf19.4388	CR_03460W_A		TAF3	NA	-0.566589	7.10118e-05	Protein with a histone fold domain; similar to TAFII47 proteins from S. cerevisiae, Danio rerio, Drosophila melanogaster, human, and mouse
orf19.7358	C3_05770C_A	SAM50	SAM50	NA	-1.15191	7.2829e-05	Predicted component of the SAM complex involved in mitochondrial protein import
orf19.2402	CR_03210C_A	SSU72	SSU72	NA	-1.12947	7.31241e-05	Protein of unknown function
orf19.5861.1	C3_04190W_A		NA	NA	0.548337	7.31537e-05	Protein of unknown function; Spider biofilm induced
orf19.1146	C1_11720W_A		NA	NA	1.22795	7.44007e-05	Protein of unknown function
orf19.1519	C2_02040W_A		NA	NA	0.609399	7.44007e-05	Protein of unknown function; Hap43-repressed gene
orf19.3554	C2_05250C_A	AAT1	AAT1	NA	-0.940663	7.44007e-05	Aspartate aminotransferase; soluble protein in hyphae; macrophage-induced protein; alkaline upregulated; amphotericin B repressed; gene used for strain identification by multilocus sequence typing; farnesol-, Hap43p-induced; GlcNAc-induced
orf19.1686	C3_01570W_A		MPA43	NA	0.578141	7.4457e-05	Protein of unknown function
orf19.242	C3_02510C_A	SAP8	NA	NA	0.75625	7.45857e-05	Secreted aspartyl protease; regulated by growth phase, temperature, white-opaque switch; highly expressed in opaque cells and upon deep epidermal invasion; greater expression in vaginal than oral infection; prominent role in biofilms
orf19.4502	C2_04500W_A		MOT1	NA	-0.523485	7.67891e-05	Protein of unknown function
orf19.751	C1_04930C_A		NA	NA	0.773027	7.68432e-05	Protein of unknown function
orf19.5927	C3_04670C_A	RPS15	RPS15	NA	-0.667023	7.76551e-05	Putative ribosomal protein; macrophage/pseudohyphal-induced after 16 h; repressed upon phagocytosis by murine macrophage; Spider biofilm repressed
orf19.5223	C1_12420C_A		NA	NA	-0.941575	7.83044e-05	Protein of unknown function
orf19.3499	C6_02100W_A		NA	NA	1.40884	8.08481e-05	Secreted potein; Hap43-repressed; fluconazole-induced; regulated by Tsa1, Tsa1B under H2O2 stress conditions; induced by Mnl1p under weak acid stress; Spider biofilm induced
orf19.6745	C3_07440W_A	TPI1	TPI1	NA	-0.727406	8.28229e-05	Triose-phosphate isomerase; antigenic in mouse/human; mutation affects filamentation; macrophage-repressed; protein in exponential and stationary growth phase yeast; possibly essential; flow model biofilm induced; Spider biofilm repressed
orf19.3549	C2_05190W_A	CDC21	CDC21	NA	-0.635069	8.37719e-05	Putative thymidylate synthase; flucytosine induced; rat catheter biofilm repressed; Spider biofilm repressed
orf19.1152	C1_11670W_A		NA	NA	-0.8011	8.41293e-05	Protein of unknown function; induced in core stress response; Gcn2 and Gcn4 regulated; flow model biofilm induced; Spider biofilm induced
orf19.6286	CR_07640C_A		VFA1	NA	-0.544484	8.50952e-05	Protein of unknown function
orf19.3021	C1_03270W_A		NA	NA	0.811998	8.64187e-05	Putative protein of unknown function; Hap43-repressed gene; Spider biofilm induced
orf19.3710	CR_07810W_A	YHB5	NA	NA	0.736728	8.67876e-05	Flavohemoglobin-related protein; not required for normal NO resistance; predicted globin/FAD-binding/NAD(P)-binding domains but lacks some conserved residues of flavohemoglobins; filament induced; rat catheter and Spider biofilm induced
orf19.5919	C3_04610W_A	MEA1	NA	NA	-0.886336	8.69703e-05	Protein similar to A. nidulans MesA, which is involved in localization of actin cables; Hap43p-induced gene
orf19.1604	C2_09460C_A		NA	NA	-0.659163	8.73144e-05	Predicted Gal4-like DNA-binding transcription factor; Spider biofilm induced
orf19.6492	C7_02220C_A		NA	SAT4	-0.761873	8.73313e-05	Predicted protein serine/threonine kinase and/or protein tyrosine kinase; Spider biofilm induced
orf19.3581	C2_05510C_A		NA	NA	0.700041	8.75603e-05	Protein of unknown function
orf19.2048	C2_00760C_A		NA	NA	-1.15121	8.83597e-05	Proten of unknown function; transcript positively regulated by Sfu1; Hap43 repressed; Spider biofilm induced
orf19.3245	CR_01090W_A		NA	NA	-0.956267	8.86671e-05	Protein of unknown function
orf19.2107	C2_00260C_A	MUQ1	ECT1	NA	-0.955726	8.93448e-05	Putative choline phosphate cytidylyltransferase/phosphoethanolamine cytidylyltransferase; repressed in hyphae compared vs yeast; Hap43-repressed; flow model biofilm induced; Spider biofilm repressed
orf19.194	C2_04730W_A		NA	NA	-0.92438	8.93787e-05	Protein of unknown function
orf19.4290	C5_02710W_A	TRR1	TRR1	NA	-0.483156	9.03271e-05	Thioredoxin reductase; regulated by Tsa1/Tsa1B, Hap43; induced by nitric oxide, peroxide; oxidative stress-induce via Cap1; induced by human neutrophils; stationary phase enriched protein
orf19.3663	C1_02050C_A	PHO91	NA	NA	-0.41904	9.05508e-05	Putative low-affinity phosphate transporter; fungal-specific (no human or murine homolog)
orf19.5989	C3_05150W_A		HRP1	NA	-0.574159	9.18298e-05	Putative cleavage factor I subunit; required for the cleavage and polyadenylation of pre-mRNA 3' ends; Spider biofilm repressed
orf19.728	CR_07580C_A	TSC11	TSC11	NA	0.625106	9.35404e-05	Protein similar to S. cerevisiae Tsc11p which is involved in sphingolipid biosynthesis; transposon mutation affects filamentous growth
orf19.5856	C3_04120C_A		NA	NA	-0.409529	9.3813e-05	Membrane-localized protein of unknown function
orf19.7648	CR_10640W_A		NA	NA	1.06936	9.40597e-05	Protein of unknown function
orf19.3266	CR_00880W_A		NA	NA	-0.517085	9.4972e-05	Protein of unknown function
orf19.934	C5_00550C_A		NA	NA	0.711418	9.56161e-05	Predicted ORF from Assembly 19; removed from Assembly 20; subsequently reinstated in Assembly 21 and merged with orf19.2224, based on comparative genome analysis; flow model biofilm repressed
orf19.6704	C7_03470W_A		NA	NA	1.46732	9.58623e-05	Protein of unknown function; Hap43-repressed gene
orf19.2094	C2_00370W_A	PDR6	KAP122	NA	-0.536174	9.67351e-05	Putative pleiotropic drug resistance regulatory protein 6; transcript regulated by Nrg1; induced by alpha pheromone in SpiderM medium
orf19.1826	C1_06230C_A	MDM34	MDM34	NA	-1.14688	9.841e-05	Putative zinc finger transcription factor; macrophage-downregulated; flow model biofilm induced; flow model and Spider biofilm induced
orf19.4368	CR_03690W_A		NA	NA	0.492274	0.000102011	Protein of unknown function
orf19.3881	CR_06290C_A		NA	NA	-0.441877	0.000102976	Protein of unknown function
orf19.7550	CR_09780C_A	IFA14	NA	NA	1.01538	0.000102976	Putative LPF family protein; Plc1-regulated; induced by alpha pheromone in SpiderM medium
orf19.6272	C1_06390W_A		YUH1	NA	-1.05176	0.000103536	Putative ubiquitin C-terminal hydrolase; regulated by Gcn2p and Gcn4p
orf19.3364	C4_03370C_A		NA	NA	-0.81566	0.000104116	Protein of unknown function
orf19.7445	C3_06560W_A		VID24	NA	-0.541022	0.000104116	Ortholog of S.c. Vid24; a peripheral membrane protein located at Vid (vacuole import and degradation) vesicles; regulated by Sef1, Sfu1, and Hap43; Spider biofilm induced
orf19.3615	C2_08620W_A		YPL191C	NA	0.278378	0.000104352	Protein of unknown function; induced in core caspofungin response; expression upregulated in an ssr1 null mutant; induced by nitric oxide independent of Yhb1p
orf19.5863	C3_04210W_A		NA	NA	1.97832	0.000105723	Protein of unknown function
orf19.7158	C7_04160W_A		NA	YIL166C	0.906002	0.000105723	Protein of allantoate permease family; fungal-specific (no human or murine homolog); Hap43p-repressed gene
orf19.259	C3_02670W_A		RSA1	NA	0.914691	0.000106282	Protein with a predicted role in 60S ribosomal subunit assembly; flow model biofilm induced
orf19.781	C1_04650W_A	DUR3	DUR3	NA	1.58439	0.000106282	High affinity spermidine transporter; expression is induced by urea; fungal-specific (no human or murine homolog); not required for virulence in a mouse intravenous model
orf19.1743	C2_10350C_A	ACS1	ACS1	NA	-0.731399	0.00010724	Acetyl-CoA synthetase; induced by human neutrophils; fluconazole-repressed; regulated by Nrg1/Mig1; colony morphology-related gene regulation by Ssn6; only in stationary phase cultures; rat catheter biofilm repressed, Spider biofilm induced
orf19.7622	CR_10450C_A	SPT3	SPT3	NA	-0.590549	0.000108768	Functional homolog of S. cerevisiae Spt3p; required for virulence in mouse systemic infection; homozygous null mutant is hyperfilamentous
orf19.926	C5_00630C_A	EXO1	EXO1	NA	0.745813	0.000108768	Putative exodeoxyribonuclease; cell-cycle regulated periodic mRNA expression
orf19.2092	C2_00390C_A		STR3	NA	-0.76357	0.000108953	Putative peroxisomal cystathionine beta-lyase; Gcn4p-regulated
orf19.6678	C5_03650C_A		NA	NA	1.20302	0.000109487	Protein of unknown function; Hap43-repressed gene
orf19.1517	C2_02030W_A	ARO3	ARO3	NA	-0.57767	0.000109505	3-deoxy-D-arabinoheptulosonate-7-phosphate synthase; aromatic amino acid synthesis; GCN-regulated; feedback-inhibited by phe if expressed in S. cerevisiae; decreased in stationary phase; flow model biofilm repressed
orf19.1107	C5_03870C_A		PAR32	NA	-0.556854	0.000110168	Protein of unknown function; Spider biofilm induced
orf19.3674	C1_02170C_A	GAL102	NA	NA	-0.873064	0.000110168	UDP-glucose 4,6-dehydratase; role in mannosylation of cell wall proteins; mutation confers hypersensitivity to toxic ergosterol analog; overlaps orf19.3673; Spider biofilm induced
orf19.6199	C1_07050C_A		HCS1	NA	0.693615	0.000110168	Protein of unknown function
orf19.6694	C7_03620C_A		NA	NA	0.672714	0.000110579	Protein of unknown function
orf19.3030	C1_03330C_A		ATG21	NA	0.705093	0.000110598	Protein of unknown function
orf19.4623.3	C4_01700C_A	NHP6A	NHP6A	NA	-1.34144	0.000111329	Putative non-histone chromatin component; RNA abundance regulated by tyrosol,cell density; Hap43-induced; amphotericin B, caspofungin repressed; 5'-UTR intron; rat catheter and Spider biofilm repressed
orf19.114	C6_01080C_A		NA	NA	0.838976	0.000111352	Protein of unknown function
orf19.7021	C7_00930W_A	GPH1	GPH1	NA	-0.398086	0.00011218	Putative glycogen phosphorylase; role in glycogen metabolism; regulated by Ssk1, Mig1, Tup1, Hap43; fluconazole-induced; localizes to cell surface of hyphae, not yeast; stationary phase enriched protein; Spider biofilm induced
orf19.6532	C7_01880C_A		FLX1	NA	2.0917	0.000113599	Protein of unknown function
orf19.5095	C1_08180C_A		OSH2	NA	-0.599123	0.000115417	Putative oxysterol-binding protein; caspofungin induced; possibly an essential gene, disruptants not obtained by UAU1 method
orf19.867	C2_03530W_A		AIM14	NA	-0.668001	0.000118456	Protein of unknown function
orf19.6563	C7_01620C_A	KCH1	KCH1	NA	0.807888	0.00011898	Ortholog of Kch1 a potassium transporter; mediates K+ influx and activates high-affinity Ca2+ influx system during mating pheromone response in S. cerevisiae; induced by alpha pheromone in SpiderM medium
orf19.4836	C1_09720W_A	URA1	URA1	NA	-0.677509	0.000119073	Dihydroorotate dehydrogenase; de novo pyrimidine biosynthesis; regulated by yeast-hypha switch, Nrg1/Mig1/Tup1; flow model biofilm induced; rat catheter and Spider biofilm repressed
orf19.5159	C7_03020C_A	DUG3	DUG3	NA	-0.725093	0.000119689	Putative glutamine amidotransferase (GATase II); role in glutathione catabolism;
orf19.1150.1	C1_11680C_A		NA	YSF3	-0.709955	0.000120906	Protein of unknown function
orf19.5564	C6_02880W_A		NA	NA	1.12965	0.000120906	Protein of unknown function
orf19.5961	C3_04920C_A		NAS6	NA	-0.887945	0.000121569	Protein of unknown function
orf19.2297	C1_11190W_A	ARL3	ARL3	NA	-0.861644	0.000121721	Putative Ras superfamily GTPase; induced by nitric oxide independent of Yhb1p
orf19.5524	C6_02550W_A		NA	NA	-0.963142	0.000126303	Protein of unknown function
orf19.1032	C1_03770W_A	SKO1	SKO1	NA	-1.10312	0.000128578	bZIP transcription factor; involved in cell wall damage response; represses the yeast-to-hypha transition; mutants are caspofungin sensitive; induced by osmotic stress via Hog1; induced by Mnl1 under weak acid stress
orf19.1297	C4_03810W_A		ATG20	NA	0.480947	0.000130766	Protein of unknown function
orf19.6285	CR_07650W_A	GLC7	NA	NA	-0.516792	0.000130766	Putative catalytic subunit of type 1 serine/threonine protein phosphatase; regulated by Shp1; induced in high iron; alternatively spliced intron in 5' UTR
orf19.6904	C7_01220W_A	GCN3	GCN3	NA	0.711998	0.0001308	Putative translation initiator; downregulated in the presence of human whole blood or polymorphonuclear (PMN) cells
snR33a	CR_02470W_A		NA	NA	-1.13109	0.000132809	H/ACA box small nucleolar RNA (snoRNA)
orf19.2650.1	C5_03290C_A		MRP10	NA	0.63057	0.000135176	Mitochondrial ribosomal protein of the small subunit; Spider biofilm repressed
orf19.997	C1_10530W_A	SNL1	NA	NA	-1.16108	0.000135257	Ribosome-associated protein predicted to function in protein synthesis; 1 predicted transmembrane domain; rat catheter biofilm repressed
orf19.5688	C5_00090C_A		NA	NA	-0.524167	0.000135997	Predicted ORF from Assembly 19; removed from Assembly 20; subsequently reinstated in Assembly 21 based on comparative genome analysis
orf19.4996	C1_13600W_A		YBL029W	NA	1.06334	0.000141062	Protein of unknown function
orf19.5391	C3_00660W_A		RSE1	NA	0.563279	0.000141696	Predicted RNA splicing and ER to Golgi transport protein; Hap43-induced gene
orf19.1089	C6_04310W_A	PEX11	PEX11	NA	-1.09546	0.000142503	Putative peroxisomal membrane protein; role in fatty acid oxidation; expression is Tac1-regulated; Hms1p-dependent induction by geldamycin; Spider biofilm induced
orf19.2272	C2_07170C_A	AFT2	AFT2	NA	-0.672513	0.000143673	Putative Aft domain transcription factor; role in regulation of iron metabolism, oxidative stress, adhesion, hyphal growth, colony morphology, virulence; complements S. cerevisiae aft1 mutation; Spider biofilm induced
orf19.285	C3_02920W_A		IGO2	NA	-0.790621	0.000144063	Ortholog of S. cerevisiae Igo2; role in mRNA stabilization of mRNA; Spider biofilm induced
orf19.2921	C4_06160W_A		NA	NA	0.608712	0.000145623	Protein of unknown function
orf19.6791	C3_07090W_A	HHT1	NA	NA	-0.423396	0.000147436	Putative histone H3; reduced mRNA abundance in fkh2 mutant; farnesol regulated; Spider biofilm induced; rat catheter biofilm repressed
orf19.3728	CR_02390W_A		GIP4	NA	-0.744197	0.000147531	Protein of unknown function
orf19.4728	C1_08700W_A		HOS4	NA	-0.309887	0.000148854	Protein of unknown function
orf19.6784	C3_07160W_A	PGA32	NA	NA	-0.79698	0.00014916	Putative GPI-anchored adhesin-like protein; induced in high iron; Spider biofilm induced
orf19.4573	C4_02180C_A	ZCF26	NA	NA	1.38184	0.000149357	Zn2-Cys6 transcription factor of unknown function; induced by alpha pheromone in SpiderM medium
orf19.6480	C7_02310C_A		YMD8	NA	0.863998	0.000149528	Protein of unknown function
orf19.3782	C4_04980W_A		YBR220C	NA	0.757481	0.00014992	Predicted membrane transporter; member of the peptide-acetyl-coA transporter (PAT) family, major facilitator superfamily (MFS); induced by alpha pheromone in Spider medium
orf19.5026	C1_13880C_A		TDA9	NA	-1.12308	0.000150871	C2H2 transcription factor; Spider biofilm induced
orf19.4743	C1_08850C_A	AFG1	NA	NA	1.11054	0.000150875	Putative mitochondrial ATPase of the AAA family; similar but not orthologous to S. cerevisiae Afg1; mutant is viable; regulated by Sef1, Sfu1, and Hap43
orf19.2099	C2_00330C_A	HIR1	HIR1	NA	-0.5792	0.000151384	Component of the HIR complex, a nucleosome assembly factor involved in chromatin formation; involved in regulation of white-opaque switching frequency
orf19.1590	C2_04320W_A		NA	NA	-0.708004	0.000151458	Protein of unknown function
orf19.1844	CR_06870C_A		NA	NA	1.76827	0.000151832	Protein similar to ferric reductase Fre10p
orf19.1353	C2_08300C_A		NA	NA	-1.05301	0.000152995	Protein of unknown function; repressed by yeast-hypha switch; Ras1-regulated; oral infection induced; mutants defective in damage to oral epithelium; flow model biofilm induced; Spider biofilm induced
orf19.499	CR_04150W_A		MTQ1	NA	1.33094	0.000152995	Protein of unknown function
orf19.3669	C1_02120C_A	SHA3	SKS1	NA	-0.847357	0.000154134	Putative ser/thr kinase involved in glucose transport; Tn mutation affects filamentous growth; fluconazole-induced; ketoconazole-repressed; induced in by alpha pheromone in SpiderM; possibly essential; flow model biofilm induced
orf19.2998	C1_03060C_A	TSR2	TSR2	NA	1.6459	0.000155291	Protein with a predicted role in pre-rRNA processing; repressed by prostaglandins
orf19.3373	C4_03460C_A		RIM4	NA	1.09687	0.000155563	Putative protein of unknown function; transcript upregulated in clinical isolates from HIV+ patients with oral candidiasis; Spider biofilm induced
orf19.3192	C5_01820W_A	STI1	NA	NA	-0.510155	0.000156294	Protein that interacts with Cdc37 and Crk1 in two-hybrid; may be involved in Cdc37 chaperone activity; soluble protein in hyphae; protein in exponential and stationary phase yeast cultures; YNB biofilm induced; Spider biofilm induced
orf19.4704	C4_00890W_A	ARO1	ARO1	NA	-0.437339	0.000158185	Putative pentafunctional arom enzyme; fungal-specific (no human or murine homolog); Gcn2p-, Gcn4p-regulated
orf19.6105	C1_00070W_A	MVD	MVD1	NA	-0.678783	0.000160146	Mevalonate diphosphate decarboxylase; functional homolog of S. cerevisiae Erg19; possible drug target; regulated by carbon source, yeast-hypha switch, growth phase, antifungals; gene has intron; rat catheter, Spider biofilm repressed
orf19.4726	C1_08680C_A		FRQ1	NA	-0.508521	0.00016102	Protein of unknown function
orf19.494	CR_04110W_A		NAF1	NA	1.65211	0.00016102	Putative RNA-binding protein; role in assembly of box H/ACA snoRNPs and thus pre-rRNA processing; Spider biofilm induced
orf19.882	C2_03390C_A	HSP78	HSP78	NA	-0.701183	0.00016102	Heat-shock protein; regulated by macrophage response, Nrg1, Mig1, Gcn2, Gcn4, Mnl1p; heavy metal (cadmium) stress-induced; stationary phase enriched protein; rat catheter and Spider biofilm induced
orf19.3617	C2_08600W_A	GTR1	GTR1	NA	-1.06099	0.000161119	Putative GTP-binding protein; transcript is upregulated in clinical isolates from HIV+ patients with oral candidiasis; (see Locus History Note for Assembly 19 correction)
orf19.4518	C2_04360W_A		YPL150W	NA	-0.538692	0.000161221	Protein kinase of unknown function; mutants are viable
orf19.4225.1	C5_02190C_A		YMR31	NA	-0.561601	0.000162466	Protein of unknown function
orf19.7300	CR_09040W_A		NA	NA	0.925002	0.000163796	Protein of unknown function; Spider biofilm induced
orf19.7556	CR_09840C_A		NA	NA	-1.0776	0.000163796	Protein of unknown function
orf19.6247.1	C1_06640C_A		TOM5	NA	-1.1734	0.000167043	Protein of unknown function
orf19.1606	C3_02390W_A		NA	NA	0.707354	0.000167765	Protein of unknown function; Plc1-regulated
orf19.4015	C5_05220W_A	CAG1	GPA1	NA	-0.584831	0.000168628	heterotrimeric G protein alpha subunit; positive role in mating pheromone response; opaque-enriched transcript; transcript repressed by MTLa1-MTLalpha2; regulated by hemoglobin-responsive Hbr1 via MTL genes; rat catheter biofilm repressed
orf19.7225	C1_14180W_A		NA	NA	-0.725801	0.000169272	Protein of unknown function
orf19.1171	C1_11490C_A	BTA1	NA	NA	2.01865	0.00016928	Protein of unknown function
orf19.5271	C1_11940C_A		NA	NA	0.942657	0.000169581	Protein of unknown function; Hap43-induced gene
orf19.7013	C7_01010W_A		NA	NA	-0.893992	0.000171138	Protein of unknown function
orf19.2563	CR_01700C_A		PRP24	NA	0.595085	0.000172841	Protein of unknown function
orf19.2419	CR_03070W_A		DOM34	NA	-0.614596	0.000174793	Ortholog of S. cerevisiae Dom34; a protein that facilitates ribosomal subunit dissociation when translation is stalled; peloto ortholog; Hap43-repressed gene
orf19.3903	C5_04200W_A	MRV3	NA	NA	-1.14958	0.0001749	Protein of unknown function
orf19.6434	CR_08600C_A	PEX19	PEX19	NA	-0.696292	0.000176396	Protein of unknown function
orf19.3448	C6_01360W_A		NA	NA	-0.719105	0.00017907	Protein of unknown function; ketoconazole-repressed
orf19.6554	C7_01700W_A		RCN2	NA	0.717694	0.000182771	Regulator of calcineurin; regulated by calcineurin-Crz1 pathway; feedback regulator of calcineurin-dependent signaling; Hap43-repressed; induced by ketoconazole, hypoxia, during growth in the mouse cecum; Spider biofilm induced
orf19.524	CR_04350C_A		NA	NA	-0.492738	0.000183142	Protein of unknown function
orf19.3008	C1_03160C_A	COQ4	COQ4	NA	-0.68951	0.000183214	Protein with a putative role in coenzyme Q biosynthesis; transcriptionally induced by interaction with macrophage; Hap43p-repressed gene
orf19.4201	C6_00570C_A	NHX1	NHX1	NA	-0.404793	0.000183214	Protein similar to S. cerevisiae Nhx1p, which is an Na+/H+ exchanger required for intracellular sequestration of Na+
orf19.5236	C1_12270W_A	SRT1	SRT1	NA	-0.82413	0.000184096	Protein of unknown function
orf19.2439.1	C1_06050C_A		QCR10	NA	-0.451534	0.000186447	Protein of unknown function
orf19.1163	C1_11560C_A		YDR336W	NA	0.675933	0.000189481	Protein of unknown function
snR54	C2_06400C_A		NA	NA	-2.00585	0.000190596	C/D box small nucleolar RNA (snoRNA); snR54 is encoded within the intron of orf19.18/IMH3
orf19.5987	C3_05140C_A		TRM11	NA	0.693886	0.000192306	Protein of unknown function
orf19.2974	C1_02860C_A	YKT6	YKT6	NA	-1.02464	0.000194578	Putative protein of the vacuolar SNARE complex; predicted role in vacuolar fusion; rat catheter biofilm repressed
orf19.6720	C3_07670W_A		YDR090C	NA	-0.643953	0.000194578	P-Loop domain-containing protein of unknown function; transposon mutation affects filamentous growth; Spider biofilm induced
orf19.692	C6_02020C_A		NA	NA	-0.886307	0.000195145	Protein of unknown function; Hap43-repressed gene; rat catheter and Spider biofilm induced
orf19.7234	C1_14240W_A		RSC8	NA	-0.476025	0.000195286	Putative RSC chromatin remodeling complex component; possibly an essential gene, disruptants not obtained by UAU1 method
orf19.2564	CR_01710W_A		NA	NA	1.563	0.000196355	Putative nucleolar protein; implicated in ribosome biogenesis; rat catheter biofilm repressed
tA(AGC)5	C5_04760W_A	tA(AGC)5	NA	NA	1.92694	0.000197709	tRNA-Ala, predicted by tRNAscan-SE; AGC anticodon
orf19.3894	C5_04120C_A		NA	NA	0.982084	0.000198169	Putative inositol oxygenase; mutation confers hypersensitivity to toxic ergosterol analog; Spider biofilm induced
orf19.2862	CR_02990C_A	RIB1	RIB1	NA	-0.506883	0.000199096	Putative GTP cyclohydrolase II; enzyme of riboflavin biosynthesis; fungal-specific (no human or murine homolog); regulated by Sef1p-, Sfu1p-, and Hap43p
orf19.3306	C1_01180C_A		HOP1	NA	1.00312	0.00020001	Protein of unknown function
orf19.4909.1	C1_10390C_A	RPL42	RPL42A	NA	-1.44706	0.000201555	Putative 60S ribosomal subunit protein; colony morphology-related gene regulation by Ssn6; Spider biofilm repressed
orf19.677	C1_11240C_A	CHO1	CHO1	NA	0.840811	0.000201722	Putative phosphatidylserine synthase; ortholog of S. cerevisiae CHO1; transposon mutation affects filamentous growth; regulated by Nrg1, Tup1
orf19.5238	C1_12250C_A		NA	NA	-1.22841	0.00020252	Protein of unknown function
orf19.5051	C1_07810C_A		NA	NA	0.660197	0.0002052	Protein of unknown function
orf19.3831	C4_04520W_A		PXR1	NA	1.10949	0.000206468	Protein of unknown function
orf19.4132	C5_01420W_A		SNA2	NA	-0.47928	0.000207967	Protein of unknown function; UPF0057 protein family member; localizes to the plasma membrane; Spider biofilm induced
orf19.1166	C1_11540C_A	CTA3	EDE1	NA	-0.678912	0.000209592	Protein similar to S. cerevisiae Ede1p, which is involved in endocytosis; activates transcription in 1-hybrid assay in S. cerevisiae
orf19.6127	CR_07400C_A	LPD1	LPD1	NA	-0.46233	0.000210109	Putative dihydrolipoamide dehydrogenase; soluble in hyphae; antigenic in human oral infection and murine systemic infection; macrophage-induced protein; protein present in exponential and stationary phase yeast cultures; Hap43p-repressed
orf19.3774.1	C4_05040W_A		HUB1	NA	-1.02874	0.000210492	Protein of unknown function
snR66	CR_06630W_A		NA	NA	-1.0776	0.000210577	C/D box small nucleolar RNA (snoRNA)
orf19.2267	C2_07120W_A	RFA2	NA	NA	-0.425821	0.000211144	Putative DNA replication factor A; RNA abundance regulated by cell cycle, tyrosol and cell density
orf19.6494	C7_02200W_A	WHI3	WHI3	NA	-0.649736	0.000211672	Putative RNA binding protein; induced during infection of murine kidney, compared to growth in vitro; has murine homolog
orf19.6085	C1_00180W_A	RPL16A	RPL16A	NA	-0.593776	0.000213913	Ribosomal protein; transposon mutation affects filamentous growth; repressed upon phagocytosis by murine macrophages; Hap43-induced; Spider biofilm repressed
orf19.2346	C1_10730W_A		FMP40	NA	0.45859	0.000214642	Putative protein of unknown function, transcription is positively regulated by Tbf1p
orf19.3521	C2_04880C_A	ARH2	ARH1	NA	-0.698883	0.000214642	Putative adrenodoxin-NADPH oxidoreductase; role in heme biosynthesis
orf19.5896	C3_04450C_A		YMR244W	NA	1.89298	0.000219641	Protein of unknown function; induced by alpha pheromone in SpiderM medium
orf19.2033	C2_00910W_A	PGA19	NA	NA	1.77816	0.000219682	Putative GPI-anchored protein; macrophage-induced gene; mutants are viable
orf19.5293	C4_04160W_A		NA	NA	-0.574366	0.000221626	Protein of unknown function
orf19.7068	C7_00510W_A	MAC1	NA	NA	1.30284	0.000222112	Copper fist transcription factor; regulator of CTR1 copper transporter; induces CTR1 in low-copper conditions; ectopic expression causes copper-sensitive stimulation of filamentation in S. cerevisiae; Spider biofilm induced
orf19.6233	C1_06770W_A		YNL181W	NA	0.55131	0.000223104	Protein of unknown function
orf19.7678	CR_10850C_A	ATP16	ATP16	NA	-0.555859	0.000223805	Subunit of the mitochondrial F1F0 ATP synthase; sumoylation target; protein newly produced during adaptation to the serum; Spider biofilm repressed
orf19.3106	C4_07030W_A	MET16	MET16	NA	0.527668	0.000224139	Putative 3'-phosphoadenylsulfate reductase; sulfur amino acid metabolism; reports differ on regulation during biofilm formation; fungal-specific; possibly an essential gene, disruptants not obtained by UAU1 method; Hap43p-repressed gene
orf19.872	C2_03490C_A		NA	NA	-0.588821	0.000225624	Protein of unknown function
orf19.6541	C7_01790C_A	RPL5	NA	NA	-0.626859	0.000228626	Ribosomal protein; repressed upon phagocytosis by murine macrophages; Hap43-induced; Spider biofilm repressed
orf19.6048	C1_00580W_A		NA	NA	0.61091	0.000230339	Protein of unknown function; Spider biofilm induced
orf19.832	C2_03920C_A	GPI13	GPI13	NA	0.522467	0.000231758	Major facilitator superfamily protein; has phosphodiesterase/nucleotide pyrophosphatase domain; similar to S. cerevisiae Gpi13p, which acts in GPI anchor biosynthesis; Hap43p-induced gene
orf19.1065	C1_04300C_A	SSA2	SSA2	NA	-0.634494	0.000231809	HSP70 family chaperone; cell wall fractions; antigenic; beta-defensin peptides impport; ATPase domain binds histatin 5; at hyphal surface, not yeast; farnesol-repressed in biofilm; flow model, Spider biofilm repressed; caspofungin repressed
orf19.1461	C2_01540W_A		NA	NA	-1.18955	0.000233032	S. pombe ortholog SPCC576.01c is a predicted sulfonate dioxygenase; possibly transcriptionally regulated upon hyphal formation; Spider biofilm induced
orf19.6934	C3_03820C_A		PNT1	NA	0.595687	0.000234303	Protein of unknown function
orf19.3555	C2_05260W_A	BUD14	BUD14	NA	0.605925	0.000235452	Putative SH3-domain-containing protein; predicted role in bud-site selection; Spider biofilm induced
orf19.5338	C2_10590W_A	GAL4	GAL4	NA	-0.903407	0.000235452	Zn(II)2Cys6 transcription factor; involved in control of glycolysis; ortholog of S. cerevisiae Gal4, but not involved in regulation of galactose utilization genes; caspofungin repressed; Spider biofilm repressed
orf19.6297	C5_01610W_A		DEG1	NA	1.32292	0.000236121	Protein of unknown function
orf19.2991	C1_03000W_A	HOL1	NA	NA	0.685941	0.000236928	Putative MFS transporter; regulated by Nrg1; macrophage/pseudohyphal-repressed; induced by alpha pheromone in SpiderM medium; possibly an essential gene, disruptants not obtained by UAU1 method
orf19.6220	C1_06910C_A		CAF130	NA	0.397536	0.000236928	Protein of unknown function
orf19.7177	C7_04030C_A	KAP120	KAP120	NA	-0.431235	0.000241365	Putative karyopherin; mutation confers hypersensitivity to cytochalasin D
orf19.4384.1	CR_03580C_A		NA	NA	-1.49778	0.000241887	Putative MFS transporter; predicted ORF in Assembly 20; removed from Assembly 21; restored based on conservation among several Candida species
orf19.6448	CR_08710W_A		NA	NA	-0.830507	0.000245933	Protein of unknown function; Spider biofilm repressed
orf19.4324	C5_02990W_A		NA	NA	1.23772	0.000246565	Protein of unknown function
orf19.5964.2	C3_04960W_A	RPL35	RPL35A	NA	-1.38554	0.000247157	Ribosomal protein; downregulation correlates with clinical development of fluconazole resistance; colony morphology-related gene regulation by Ssn6; Hap43-induced; Spider biofilm repressed
snR44b	C1_06830W_A		NA	NA	-1.25966	0.000249468	H/ACA box small nucleolar RNA (snoRNA)
orf19.4958	C1_13310W_A	ECM25	NA	NA	0.644312	0.000256689	Non-essential protein involved in cell morphogenesis
orf19.1543	C2_02250C_A	OPI1	OPI1	NA	-0.713549	0.00025931	Leucine zipper transcription factor; repressor of INO1 involved in inositol biosynthesis; functional homolog of S. cerevisiae Opi1; has putative Opi1-Sin3 interaction domain; interacts with ScSin3, but not CaSin3
orf19.5686	C5_00100C_A		NA	NA	-0.825954	0.000262143	Protein of unknown function; Spider biofilm induced
orf19.2465	C1_05850W_A	POL32	POL32	NA	0.447924	0.000263766	Putative subunit of DNA polymerase delta, involved in chromosomal DNA replication; cell-cycle regulated periodic mRNA expression
orf19.5061	C1_07890C_A	ADE5,7	ADE5,7	NA	-0.88191	0.000265766	Phosphoribosylamine-glycine ligase and phosphoribosylformylglycinamidine cyclo-ligase; interacts with Vps34p; required for hyphal growth and virulence; flucytosine induced; not induced in GCN response, in contrast to S. cerevisiae ortholog
orf19.5428	C3_00390W_A		ATX2	NA	0.946942	0.000270783	Putative Golgi membrane protein with a predicted role in manganese homeostasis; Hap43p-repressed gene; clade-associated gene expression
orf19.5782	C2_03140C_A		YOR022C	NA	-0.797359	0.000273718	Protein of unknown function
orf19.3002	C1_03090W_A	RPS1	RPS1B	NA	-0.504206	0.000275221	Putative ribosomal protein 10 of the 40S subunit; elicits host antibody response during infection; transcript induced during active growth; Spider biofilm repressed
orf19.7012	C7_01020C_A		MRPS16	NA	1.25364	0.000276803	Protein of unknown function
orf19.4121	C2_05990C_A		NA	NA	1.16824	0.000281512	Predicted thioesterase/thiol ester dehydrase-isomerase; Spider biofilm induced
orf19.3981	C5_04930C_A	MAL31	MAL31	NA	-1.45735	0.000282146	Putative high-affinity maltose transporter; transcript is upregulated in clinical isolates from HIV+ patients with oral candidiasis; alkaline induced; Spider biofilm induced
orf19.1927	C5_01390C_A	SNM1	SNM1	NA	0.987839	0.000284464	Protein similar to RNase MRP RNA binding protein; ciclopirox olamine induced; regulated by Sef1, Sfu1, and Hap43; Spider biofilm induced
orf19.5263	C1_12030W_A	SER33	SER3	NA	-0.60465	0.000285186	Predicted enzyme of amino acid biosynthesis; Gcn4p-regulated; upregulated in biofilm; protein present in exponential and stationary growth phase yeast cultures; S. cerevisiae ortholog is Gcn4p regulated
orf19.2344	C1_10740C_A	ASR1	NA	NA	-1.56703	0.000287758	Heat shock protein; transcript regulated by cAMP, osmotic stress, ciclopirox olamine, ketoconazole; repressed by Cyr1, Ras1; colony morphology-related regulated by Ssn6; stationary phase enriched; Hap43-induced; Spider biofilm induced
orf19.5175	C7_02860C_A		SSM4	NA	-0.454846	0.000287758	Protein of unknown function
orf19.3418	C6_01680C_A		NA	NA	1.21371	0.000289559	Protein of unknown function
orf19.4735	C1_08770W_A		YGL159W	NA	0.955441	0.000289559	Ornithine cyclodeaminase family protein; Sef1, Sfu1, and Hap43-regulated; ortholog of S. cerevisiae YGL159W and S. pombe SPAP11E10.01; rat catheter biofilm induced
orf19.5129	C7_03260C_A		NA	NA	-0.842505	0.000289559	Protein of unknown function
orf19.716	CR_06500C_A		NA	NA	0.577961	0.000291379	Protein of unknown function; Hap43-induced; regulated by Nrg1, Tup1; repressed by alpha pheromone in SpiderM medium; Spider biofilm induced; Bcr1-repressed in RPMI a/a biofilms
orf19.6178	C3_07830W_A	FBP1	FBP1	NA	-0.541801	0.000292081	Fructose-1,6-bisphosphatase; key gluconeogenesis enzyme; regulated by Efg1, Ssn6; induced by phagocytosis; effects switch from glycolysis to gluconeogenesis in macrophage; rat flow model biofilm induced; overlaps orf19.6179
orf19.2711.1	C4_02840C_A	MED20	SRB2	NA	0.591629	0.000292822	Subunit of the RNA polymerase II mediator complex; involved in control of filamentous growth and Spider biofilm formation; rat catheter biofilm repressed
orf19.6404	CR_08370W_A	GSH2	GSH2	NA	-0.43503	0.000292888	Putative glutathione synthase; induced in high iron; heavy metal (cadmium) stress-induced
orf19.6626	CR_05880W_A		NA	NA	-0.715788	0.000292888	Predicted homeodomain-containing protein; possible transcription factor; possibly transcriptionally regulated upon hyphal formation
orf19.89	C6_00880W_A	PEX7	PEX7	NA	-0.573793	0.000293445	Protein of unknown function
orf19.792	C2_04280W_A		NA	NA	-0.805875	0.00029616	Protein of unknown function
orf19.6064	C1_00430W_A		ATG18	NA	-0.824812	0.00029628	Protein of unknown function
orf19.684	C6_01920C_A		NA	NA	-0.510903	0.000296537	Putative transcription factor with zinc finger DNA-binding motif; heterozygous null mutant exhibits hypersensitivity to parnafungin and cordycepin in the C. albicans fitness test
orf19.2128	C6_04450W_A		YLF2	NA	0.52192	0.000301699	Protein of unknown function
orf19.7295	CR_08980C_A		SCD5	NA	-0.75818	0.000301699	Protein of unknown function
orf19.3515	CR_05440W_A		BNA1	NA	-0.612215	0.000304285	Putative 3-hydroxyanthranilic acid dioxygenase, involved in NAD biosynthesis; Hap43p-repressed gene
orf19.2242	C2_06880C_A	PRB1	NA	NA	-0.62482	0.000304905	Endoprotease B; regulated by heat, carbon source (GlcNAc-induced), nitrogen, macrophage response, human neutrophils; similar to (does not replace) S. cerevisiae vacuolar B protease Prb1p; flow model biofilm induced; Spider biofilm induced
orf19.6788	C3_07120W_A		HRI1	NA	0.648903	0.00030555	Protein with a predicted role in cotranslational protein targeting to membrane; induced during chlamydospore formation in both C. albicans and C. dubliniensis
orf19.3977	C5_04900C_A		RBG2	NA	0.581686	0.000306608	Protein with a role in translation; flow model biofilm repressed
orf19.6991	C3_05560W_A	PRE3	NA	NA	-0.378868	0.000306608	Putative beta-1 proteasome subunit; macrophage-induced protein; regulated by Gcn2p and Gcn4p; GlcNAc-induced protein
orf19.1643	C3_02030W_A		NA	NA	0.589566	0.000307395	Protein of unknown function
orf19.567	C5_00690C_A	TFB3	TFB3	NA	-0.9232	0.00031283	Putative C3HC4 zinc finger transcription factor; transcript positively regulated by Tbf1; Spider biofilm induced
orf19.6506	C7_02110W_A		NA	NA	0.603671	0.000314683	Protein of unknown function
orf19.2847.1	CR_02900W_A		NA	NA	1.99643	0.000318862	Pseudogene; formerly an ORF Predicted by Annotation Working Group that was subsequently removed from Assembly 20
orf19.2922	C4_06150C_A		HOP2	NA	2.31037	0.000318883	Protein of unknown function
orf19.7364	C3_05840W_A		NA	NA	2.0657	0.000319463	Protein of unknown function
orf19.1865	C2_07600C_A	MCS7	MSC7	NA	-0.992279	0.000319495	S. cerevisiae ortholog Mcs7 has a role in reciprocal meiotic recombination; Spider biofilm repressed
orf19.2818	CR_02590C_A		PRP16	NA	0.653662	0.000319495	Protein of unknown function
orf19.1417	C4_04300C_A		NA	NA	-0.521134	0.0003213	Protein of unknown function
orf19.151	C2_04690C_A	TPO5	TPO5	NA	0.745154	0.000322187	Putative polyamine transporter; mutation confers hypersensitivity to toxic ergosterol analog; hyphal induced; macrophage induced
orf19.2343.1	C1_10750C_A		VMA9	NA	-0.372962	0.000322197	Putative vacuolar H+ ATPase subunit e of the V-ATPase V0 subcomplex; added to Assembly 21 based on comparative genome analysis
orf19.2194	C2_07880W_A	APM4	APM4	NA	-0.496258	0.000323759	Cargo-binding subunit of the clathrin associated protein complex (AP-2), involved in endocytosis
orf19.2006	C2_01190C_A		NA	NA	-0.896403	0.000324446	Protein of unknown function
orf19.4468	C1_03940W_A		NA	NA	-0.961945	0.000324822	Putative succinate dehydrogenase; localized to the mitochondrial membrane; Hap43p-repressed gene
orf19.4750	C1_08910C_A		NA	NA	0.689412	0.000327623	Protein of unknown function
orf19.4035	C5_05390C_A	PGA4	GAS5	NA	-0.646368	0.000331086	GPI-anchored cell surface protein; beta-1,3-glucanosyltransferase with similarity to the A. fumigatus GEL family; transcript induced in RHE model of oral candidiasis; fluconazol-induced
orf19.3037	C1_03370W_A		PAB1	NA	-0.669123	0.000334658	Putative poly(A)-binding protein; regulated by Gcn4p; induced in response to amino acid starvation (3-AT treatment); protein present in exponential and stationary growth phase yeast cultures
orf19.6956	C3_03640W_A	DAL9	NA	NA	0.888783	0.000334866	Putative allantoate permease; fungal-specific (no human or murine homolog)
orf19.1665	C3_01810C_A	MNT1	KTR1	NA	0.456542	0.000335684	Alpha-1,2-mannosyl transferase; predicted type II Golgi membrane protein; adds 2nd mannose during cell-wall mannoprotein biosynthesis; required for wild-type virulence and adherence to epithelial cells; Hap43-induced
orf19.5180	C7_02810W_A	PRX1	NA	NA	-0.496625	0.000338024	Thioredoxin peroxidase; transcriptionally induced by interaction with macrophage; fluconazole induced; Fkh2p-downregulated; caspofungin repressed; protein present in exponential and stationary growth phase yeast cultures
orf19.4984	C1_13530W_A		NA	NA	-0.556347	0.000342346	Protein of unknown function
orf19.7217	C1_14110C_A	RPL4B	RPL4B	NA	-0.587912	0.000342379	Ribosomal protein 4B; repressed upon phagocytosis by murine macrophage; Spider biofilm repressed
orf19.758	C1_04840C_A		MRL1	NA	-0.676826	0.000342913	Protein of unknown function
orf19.6643	CR_05690W_A	MCT1	MCT1	NA	0.930645	0.000342998	Putative malonyl-CoA acyl carrier protein acyltransferase
orf19.7006	C7_01070C_A		NA	NA	-0.771341	0.000343865	Protein of unknown function
orf19.7073	C7_00460W_A		YCL002C	NA	1.26282	0.000343865	Protein of unknown function
orf19.4914.1	C1_12850W_A	BLP1	NA	NA	-1.0667	0.000344231	Protein of unknown function, serum-induced
orf19.4393	CR_03500W_A	CIT1	CIT1	NA	-0.880657	0.000344866	Citrate synthase; induced by phagocytosis; induced in high iron; Hog1-repressed; Efg1-regulated under yeast, not hyphal growth conditions; present in exponential and stationary phase; Spider biofilm repressed; rat catheter biofilm induced
orf19.5673	C4_00440C_A	OPT7	NA	NA	1.01938	0.00034952	Putative oligopeptide transporter; possibly transports GSH or related compounds; Hog1-induced; expression of OPT6, -7, or -8 does not suppress defect of mutant lacking OPT1-3; Hap43-repressed; F-12/CO2 early biofilm induced
orf19.7356	C3_05750C_A		NA	NA	-0.894046	0.000350286	Protein of unknown function
orf19.1377	C2_09730C_A	IPK2	ARG82	NA	0.788482	0.000353302	Putative inositol polyphosphate multikinase; moderately induced at 42 deg
orf19.5056	C1_07850C_A		DOC1	NA	0.57781	0.000353503	Protein of unknown function
orf19.7144	C7_04260W_A		HBS1	NA	-0.594361	0.000353906	Protein of unknown function
orf19.4791	C1_09310C_A		NA	NA	0.552872	0.000354937	Protein of unknown function; Spider biofilm induced
orf19.2796	C1_07490C_A		POL12	NA	0.589543	0.000355202	Protein of unknown function
orf19.4006	C5_05140W_A		PAN5	NA	0.938643	0.000360518	Protein of unknown function
snR5a	C1_01720C_A		NA	NA	-1.12933	0.000361409	H/ACA box small nucleolar RNA (snoRNA)
orf19.492	CR_04090C_A	ADE17	ADE17	NA	-0.689215	0.000366543	5-Aminoimidazole-4-carboxamide ribotide transformylase, enzyme of adenine biosynthesis; antigenic in human; soluble protein in hyphae; not induced during GCN response, in contrast to the S. cerevisiae ortholog
orf19.3563	C2_05330C_A		NA	NA	-0.750975	0.000367329	Protein of unknown function
orf19.7209	C1_14020W_A		NA	NA	1.46699	0.000369928	Putative Rho GDP dissociation inhibitor; induced by nitric oxide independent of Yhb1p
orf19.7625	CR_10480W_A	PGA1	NA	NA	-0.865175	0.000376136	Putative GPI-anchored protein; induced during cell wall regeneration; required for normal adhesion to host cells and for adherence during Sabouraud biofilm formation; Spider biofilm induced
orf19.6298	C5_01600C_A	SPB4	SPB4	NA	1.52379	0.000376958	Putative ATP-dependent RNA helicase; flucytosine repressed; Spider biofilm induced
orf19.6243	C1_06680W_A	VPS34	VPS34	NA	-0.743464	0.000379662	Autophosphorylated class III phosphatidylinositol 3-kinase; required for normal vesicle transport, hyphal growth, fibroblast adherence, virulence in mouse systemic infection; growth-regulated; caspofungin and hydrogen peroxide sensitivity
orf19.6826	C3_06780C_A	SLF1	NA	NA	0.517138	0.000379926	Putative polysome-associated RNA binding protein; macrophage-induced gene
orf19.6464	C7_02450W_A		NA	NA	-0.43745	0.000382033	Protein of unknown function; induced upon adherence to polystyrene; oxidative stress-induced via Cap1
orf19.951	C5_00390C_A		NA	NA	-0.578045	0.000382038	Protein of unknown function; transcript repressed upon yeast-hyphal switch; fluconazole-induced; Hap43-repressed; flow model biofilm induced
orf19.2873	C4_06600W_A	TOP2	NA	NA	0.533881	0.000385983	DNA topoisomerase II; catalyzes ATP-dependent DNA relaxation and decatenation in vitro; Y842 predicted to be catalytic; functional homolog of S. cerevisiae Top2p; sensitive to amsacrine or doxorubicin; farnesol-upregulated in biofilm
orf19.7183	C7_03980W_A		EMC4	NA	-0.503282	0.000400773	Protein of unknown function
orf19.7150	C7_04230W_A	NRG1	NRG2	NA	-0.549252	0.000402388	Transcription factor/repressor; regulates chlamydospore formation/hyphal gene induction/virulence and rescue/stress response genes; effects both Tup1 dependent and independent regulation; flow model biofilm induced; Spider biofilm repressed
orf19.2483	C1_05680C_A	RIM1	RIM1	NA	-1.21091	0.000404426	Putative single-stranded DNA-binding protein; protein level decreases in stationary phase cultures; rat catheter biofilm repressed
orf19.7370	C3_05900W_A		YPQ1	NA	-0.653604	0.000407898	Possible G-protein coupled receptor; vacuolar membrane transporter for cationic amino acids; PQ-loop motif; rat catheter and Spider biofilm induced
orf19.2398	CR_03250C_A		NA	NA	-0.836434	0.000413233	Protein of unknown function; Hap43-repressed; transcript increased in azole-resistant strain overexpressing CDR1 and CDR2; possibly regulated by Tac1; induced by Mnl1 in weak acid stress; flow model biofilm induced; Spider biofilm induced
orf19.5381	C3_00730W_A		PUF4	NA	0.680706	0.000413233	Protein of unknown function
orf19.1632	C3_02140C_A		NA	NA	-1.3388	0.000414268	Protein of unknown function
orf19.4475	C1_04000C_A	KTR4	KTR4	NA	0.596955	0.000431862	Mannosyltransferase; induced during cell wall regeneration; fungal-specific (no human or murine homolog); Bcr1-repressed in RPMI a/a biofilms
orf19.1941	C5_01280C_A	NUF2	NA	NA	-0.456949	0.000435135	Kinetochore component; amount of Nuf2p and Mtw1p protein detected at each centromere is consistent with a single kinetochore microtubule attachment site
orf19.5469	C3_00030C_A		NA	NA	-0.532326	0.000437466	Protein with a predicted DEAD-like DNA/RNA helicase domain; shows colony morphology-related gene regulation by Ssn6; overlaps orf19.5472; Spider biofilm repressed
orf19.3518	CR_05480W_A		ODC1	NA	0.578993	0.000441624	Protein of unknown function
orf19.3058	C1_03550C_A	COQ6	COQ6	NA	-0.599849	0.000446962	Protein of unknown function
orf19.5160	C7_03010W_A		SAP190	NA	0.516164	0.00044887	Protein of unknown function
orf19.3535	C2_05040C_A		CSI2	NA	0.376458	0.000449272	Protein of unknown function
orf19.3706	CR_07780W_A		NA	AST2	-0.687221	0.000449993	Protein of unknown function
orf19.3965	C5_04790C_A		NA	NA	-0.580967	0.000450265	Protein of unknown function
orf19.1136	C1_11800C_A		APS2	NA	-0.979692	0.000450939	Protein of unknown function
orf19.3795	C4_04840C_A	AGP3	AGP3	NA	0.660414	0.000452081	Putative serine transporter; possible role in assimilation of sulfur; F-12/CO2 early biofilm induced
orf19.6863	C4_05240C_A	VPH1	VPH1	NA	-0.437039	0.00045314	Vacuolar H(+)-ATPase; transcription regulated by Nrg1, Mig1, and Tup1
orf19.5861	C3_04180W_A	KRE9	KRE9	NA	0.406515	0.000453482	Protein of beta-1,6-glucan biosynthesis; required for serum-induced hyphal growth; required for efficient utilization of galactose and for growth on glucose; similar to S. cerevisiae Kre9p and Knh1p; O-glycosylated by Pmt1p
orf19.1055	C1_04210C_A	CDC3	CDC3	NA	0.557175	0.000453841	Septin; essential for viability; functional homolog of S. cerevisiae Cdc3p; down-regulation associated with azole resistance; macrophage/pseudohyphal-repressed; virulence-group-correlated expression; gene has intron
orf19.3010	C1_03180W_A		LIP2	NA	0.657379	0.00045592	Putative lipoyl ligase; role in modification of mitochondrial enzymes by attachment of lipoic acid groups; rat catheter biofilm induced
orf19.3610	C2_08660C_A		NA	NA	0.645481	0.000456304	Protein of unknown function; upregulation correlates with clinical development of fluconazole resistance; regulated by Sef1, Sfu1, and Hap43
orf19.3539	C2_05080C_A		BMT2	NA	0.981281	0.000456536	Predicted nucleolar S-adenosylmethionine-dependent rRNA methyltransferase; Spider biofilm induced
orf19.446.2	C1_05180C_A		NA	NA	-0.45519	0.000458307	Protein with a NADH-ubiquinone oxidoreductase B18 subunit domain; gene has intron
orf19.6810	C3_06910C_A	TPD3	TPD3	NA	-0.343594	0.000464299	Protein of unknown function
orf19.69	C1_12470W_A		NA	NA	0.97826	0.000467464	Protein of unknown function; induced by Mnl1 under weak acid stress
orf19.7093	C7_00290C_A	HGT13	NA	NA	-1.68621	0.000467968	Predicted sugar transporter, involved in glycerol utilization; member of the major facilitator superfamily; 12 transmembrane; gene has intron; oxidative stress-induced via Cap1p; expressed in rich medium, 2% glucose
orf19.5897	C3_04460W_A		SEA4	NA	0.562703	0.000471629	Protein of unknown function
orf19.2018.1	C2_01040W_A		NA	NA	-1.01719	0.000471656	PProtein of unknown function; gene has intron; similar to human BLOC1S2
orf19.6749	C3_07410C_A	KRS1	KRS1	NA	-0.57095	0.000471656	Putative tRNA-Lys synthetase; repressed upon phagocytosis by murine macrophages; stationary phase enriched protein; Spider biofilm repressed
orf19.1351	C2_08320C_A		NA	NA	-0.532854	0.000473479	Protein of unknown function
orf19.251	C3_02610C_A	GLX3	HSP31	NA	-0.945954	0.000473479	Glutathione-independent glyoxalase; binds human immunoglobulin E; alkaline, fluconazole, Hog1 repressed; hypoxia, oxidative stress via Cap1, Hap43 induced; stationary-phase enriched; rat catheter, Spider biofilm induced
orf19.1935	C5_01330W_A		NA	NA	-1.02913	0.000477482	Dubious open reading frame
orf19.7312	CR_09160C_A	ERG13	ERG13	NA	-0.697622	0.000477482	3-hydroxy-3-methylglutaryl coenzyme A synthase; ergosterol biosynthesis; sumoylation target; Tn mutation affects filamentation; amphotericin B, caspofungin repressed; exponential, stationary growth phase expressed; Spider biofilm repressed
orf19.5311	C4_04010W_A		NA	NA	0.94617	0.000477951	Protein of unknown function
RDN25	CR_08810W_A	RDN25	NA	NA	-0.776586	0.000477951	25S ribosomal RNA; component of the large (60S) ribosomal subunit; encoded in about 55 copies of the rDNA repeat on Chromosome R; in some strains the gene may contain the self-splicing group I intron (LSU)
orf19.827.1	C2_03960W_A	RPL39	RPL36A	NA	-1.37494	0.000478018	Ribosomal protein L39; transcript induced upon germ tube formation; colony morphology-related gene regulation by Ssn6; Hap43-induced
orf19.3797	C4_04820C_A		MRPL11	NA	0.936743	0.000483369	Protein of unknown function
orf19.7274	C1_14560C_A		NA	NA	-0.529412	0.000488413	Predicted ORF in retrotransposon Zorro2 with similarity to retroviral reverse transcriptase proteins
orf19.689	C6_01990W_A	PLB1	NA	PLB3	-1.06832	0.000490864	Phospholipase B; host cell penetration and virulence in mouse systemic infection; Hog1-induced; signal sequence, N-glycosylation, and Tyr phosphorylation site; induced in fluconazole-resistant strains; rat catheter biofilm repressed
orf19.3442	C6_01420C_A		NA	NA	-0.544367	0.000494882	Putative oxidoreductase; Hap43-repressed gene
orf19.5384	C3_00710W_A	CHS8	NA	NA	0.413141	0.000502565	Chitin synthase required for synthesis of long-chitin fibrils; nonessential; 8 or 9 membrane spanning regions; mRNA present in yeast and hyphae; induced during cell wall regeneration; flow model biofilm repressed
orf19.1977	C5_00900C_A	URA4	URA4	NA	0.420785	0.000509949	Dihydroorotase; protein present in exponential and stationary growth phase yeast cultures
orf19.2513	C3_01110C_A		NA	NA	0.660924	0.000511673	Protein of unknown function
orf19.300	C3_03040W_A	AIP2	DLD2	NA	0.329689	0.00051734	Putative actin interacting protein; regulated by Gcn4; induced in response to amino acid starvation (3-AT); repressed by elevated CO2; flow model biofilm repressed
orf19.7306	CR_09100C_A		YPR127W	NA	0.50329	0.000518925	Aldo-keto reductase; increased transcript associated with MDR1 overexpression, benomyl or long-term fluconazole treatment; overexpression does not affect drug or oxidative stress sensitivity; stationary phase enriched; flow biofim repressed
orf19.1182	C6_00240C_A		VAM7	NA	-0.877329	0.00052277	Protein of unknown function
orf19.5257	C1_12080W_A	LCB4	NA	NA	0.47108	0.000524564	Putative sphingosine kinase; Tac1p-regulated expression; rat catheter biofilm induced
orf19.922	C5_00660C_A	ERG11	ERG11	NA	-0.853558	0.000527522	Lanosterol 14-alpha-demethylase; cytochrome P450 family; role in ergosterol biosynthesis; target of azole antifungals; may contribute to drug resistance; azole or flow model biofilm induced; drug treated biofilm induced; hypoxia regulated
orf19.216.1	C2_08900W_A		NA	NA	-0.954029	0.000533619	Protein of unknown function
orf19.7053	C7_00660W_A	GAC1	GAC1	NA	-1.04761	0.000543921	Putative regulatory subunit of ser/thr phosphoprotein phosphatase 1; fluconazole-induced; caspofungin repressed; transcript induced by Mnl1 under weak acid stress; regulated by Nrg1, Tup1; Spider and flow model biofilm induced
orf19.6252	C1_06590C_A		SPN1	NA	-0.366457	0.000556019	Protein of unknown function
orf19.3529	C2_04970W_A	ABP2	NA	NA	-0.654469	0.00055794	Putative alpha-actinin-like protein; induced by alpha pheromone in SpiderM medium
orf19.5999	C3_05210C_A	DYN1	DYN1	NA	-0.544285	0.00055794	Dynein heavy chain; motor protein that moves to microtubule minus end; required for yeast cell separation, spindle positioning, nuclear migration, hyphal growth; regulated by Mig1, Hap43; flow model and rat catheter biofilm repressed
orf19.2320	C1_10950C_A		RIO1	NA	1.48454	0.000558198	Putative serine/threonine-protein kinase; possibly an essential gene, disruptants not obtained by UAU1 method
orf19.7402	C3_06300W_A	DOT1	DOT1	NA	0.446407	0.000560134	Putative modulator of white-opaque switching
orf19.6036	C1_00690W_A	RIC1	RIC1	NA	0.473046	0.000561056	Ortholog of S. cerevisiae Ric1 guanyl-nucleotide exchange factor; mutant is viable; rat catheter biofilm repressed
orf19.7116	C7_00070C_A		LEO1	NA	-0.532879	0.000567908	Protein of unknown function; transcript induced in RHE model of oral candidiasis; Spider biofilm repressed
orf19.5910	C3_04540C_A		NTO1	NA	0.502948	0.000568516	Putative histone acetyltransferase complex subunit; induced upon low-level peroxide stress; Spider biofilm induced
orf19.6842	C1_04480C_A	TUS1	TUS1	NA	-0.616963	0.000568863	Putative guanine nucleotide exchange factor; induced by Mnl1 under weak acid stress; Spider biofilm induced
orf19.7486	CR_00480W_A	MRPL6	MRPL6	NA	0.931608	0.00057142	Putative mitochondrial ribosomal protein
orf19.3512	CR_05430W_A	CSP1	NA	NA	0.769904	0.000576758	Putative cell wall associated protein; gene only found in C. albicans and C. dubliniensis; highly upregulated during chlamydospore development in both species; localized to chlamydospore cell wall
orf19.7341	CR_09440C_A		NA	NA	-0.508782	0.000578403	Protein of unknown function; flow model biofilm induced; ketoconazole-repressed
orf19.113	C6_01070C_A	CIP1	NA	NA	0.824797	0.000578572	Possible oxidoreductase; transcript induced by cadmium but not other heavy metals, heat shock, yeast-hypha switch, oxidative stress (via Cap1), or macrophage interaction; stationary phase enriched protein; Spider biofilm induced
orf19.496	CR_04120C_A		MSH1	NA	-0.748033	0.000580125	Protein of unknown function
orf19.1496	C2_01870C_A		NA	NA	0.635264	0.000580441	Putative transcription factor with zinc finger DNA-binding motif; Hap43p-repressed gene
orf19.4258	C5_02480W_A		NA	NA	0.404757	0.000580455	Puttaive pre-mRNA polyadenylation factor; heterozygous null mutant exhibits hypersensitivity to parnafungin and cordycepin in the C. albicans fitness test
orf19.3010.1	C1_03190C_A	ECM33	ECM33	NA	-0.556666	0.000581825	GPI-anchored cell wall protein; mutants show cell-wall defects and reduced adhesion, host cell damage, and endocytosis; mutant infection is immunoprotective in murine model; fluconazole-induced; caspofungin repressed
orf19.2447	C1_05980W_A		LSB6	NA	0.448159	0.000584685	Putative Type II phosphatidylinositol 4-kinase; Ssr1-repressed; flow model biofilm repressed
orf19.6610	CR_09520C_A		STU2	NA	0.607616	0.000585666	Protein of unknown function
orf19.5020	C1_13820C_A		NA	NA	1.03437	0.000591553	Protein of unknown function; Hap43-induced; Spider biofilm induced
orf19.6072.1	C1_00370W_A		NA	NA	-0.823713	0.000592465	Protein of unknown function
orf19.4684.2	C4_01050C_A	RPL40B	NA	RPL40B	-1.02523	0.00059268	Protein with similarity to the ribosomal protein portion of S. cerevisiae Rpl40Bp; colony morphology-related gene regulation by Ssn6; positively regulated by Tbf1; Spider biofilm repressed
orf19.5465	C3_00100W_A		YJU2	NA	-0.678644	0.000593798	Protein of unknown function
orf19.3665	C1_02080W_A	SET6	SET6	NA	0.606005	0.00060108	Ortholog of S. cerevisiae Set6, a SET domain protein of unknown function; Hap43-induced; rat catheter and Spider biofilm induced
orf19.6168	C3_00910W_A		NA	NA	0.682852	0.000601699	Protein of unknown function
orf19.362	C4_00010W_A	TLO9	NA	NA	-0.703022	0.000609495	Member of a family of telomere-proximal genes of unknown function; Hap43p-repressed gene
orf19.2639.1	C5_03400C_A		LSM7	NA	-1.10925	0.000610195	Lsm (Like Sm) protein; predicted role in involved in mRNA decay; Spider biofilm repressed
orf19.1228	C1_07680W_A	HAP2	HAP2	NA	-0.937634	0.000614787	CCAAT-binding transcription factor; regulates low-iron induction of FRP1; in these conditions CBF comprises Hap43 and probably Hap2 and Hap3; possibly essential, disruptants not obtained by UAU1 method; Cap1-dependent induction in low iron
orf19.4356	CR_03850W_A	HGT3	NA	NA	-0.883925	0.00061481	Putative glucose transporter of the major facilitator superfamily; the C. albicans glucose transporter family comprises 20 members; 12 probable membrane-spanning segments, extended C terminus; expressed in rich medium with 2% glucose
orf19.5978	C3_05080W_A		NA	NA	0.737167	0.000615575	Protein of unknown function
orf19.3355	C1_01650W_A	ISN1	ISN1	NA	-0.528842	0.000621525	Putative inosine 5'-monophosphate 5'-nucleotidase; fungal-specific (no human or murine homolog)
orf19.4079	C2_09170W_A	SLP2	NA	NA	-0.421972	0.000621558	Protein similar to stomatin mechanoreception protein
orf19.5103	C1_08240C_A		NA	NA	-0.709306	0.000621558	Protein with a predicted phosphoglycerate mutase family domain; Hap43-repressed; clade-associated gene expression; induced by hypoxia
orf19.3573	C2_05440W_A	PEX6	PEX6	NA	0.633287	0.000627671	Protein of unknown function
orf19.3928	C5_04410C_A		NA	NA	-0.58271	0.000628464	Putative transcription factor with zinc finger DNA-binding motif
orf19.707	CR_06730W_A	APG7	ATG7	NA	0.598687	0.000630816	Protein of unknown function
orf19.2593	CR_01930C_A	BIO2	BIO2	NA	-0.715143	0.000631547	Putative biotin synthase; induced by high iron; repressed by ciclopirox olamine; upregulated in clinical isolates from HIV+ patients with oral candidiasis; Hap43-repressed; Spider biofilm induced
snR8c	C7_02190W_A		NA	NA	-0.852801	0.000636815
orf19.928	C5_00610C_A		NA	NA	0.697371	0.000640794	Protein of unknown function
snR78	C4_01640C_A		NA	NA	-0.890646	0.000643528	C/D box small nucleolar RNA (snoRNA)
orf19.5974	C3_05040C_A	ATG9	ATG9	NA	0.362949	0.00064517	Protein similar to S. cerevisiae Atg9; required for early step in autophagy; required for cytoplasm to vacuole trafficking of Lap41; Spider biofilm induced
orf19.2082	C2_00460W_A	SAP30	NA	NA	1.54345	0.000645194	Aspartic-type endopeptidase; involved in degradation of alpha pheromone; functional equivalent of S. cerevisiae Bar1; a-cell specific; induced by alpha pheromone
orf19.2540	CR_01540W_A	SAS3	SAS3	NA	0.318723	0.000657531	Similar to silencing proteins; increased transcription is observed upon fluphenazine treatment; rat catheter biofilm repressed
orf19.310	C3_03130C_A		NA	NA	0.868105	0.00066279	Putative mitochondrial protein with a predicted role in cell wall biogenesis; possibly an essential gene, disruptants not obtained by UAU1 method
orf19.2710	C4_02860W_A		GLC8	NA	-0.934426	0.000663345	Protein of unknown function
orf19.345	C3_03470W_A		UGA2	NA	0.881171	0.000663345	Succinate semialdehyde dehydrogenase; for utilization of gamma-aminobutyrate (GABA) as a nitrogen source; part of 4-aminobutyrate and glutamate degradation pathways; rat catheter biofilm induced
orf19.7670	CR_10800C_A		VNX1	NA	-0.652464	0.000663345	Putative Ca2+/H+ antiporter; oral infection upregulated gene; mutants have reduced capacity to damage oral epithelial cells
orf19.5568	C6_02920C_A	VPS51	VPS51	NA	-0.433009	0.000664276	Protein with a role in vacuolar function; null mutant has defect in damaging oral epithelial and vascular endothelial cells; required for normal hyphal growth and stress resistance; induced in presence of host oral or vascular cells
orf19.5282	C1_11850W_A		NA	NA	-0.694603	0.000664492	Protein of unknown function; Hap43-repressed gene; mRNA binds to She3; repressed in hyphae; Efg1 and Efh1 regulated; 5'-UTR intron; induced by Mnl1 under weak acid stress; rat catheter biofilm induced
orf19.2797	C1_07480C_A		NA	IRC3	1.70284	0.000667277	Protein of unknown function
orf19.989	C1_10470W_A		MRPS5	NA	0.639978	0.000673052	Mitochondrial ribosomal protein of the small subunit; Spider biofilm repressed
orf19.4244	C5_02360C_A		NA	NA	0.800679	0.000677408	Protein of unknown function
orf19.7242	C1_14300C_A	NCR1	NCR1	NA	-0.909876	0.000681323	Putative vacuolar membrane protein; predicted role in sphingolipid metabolism; transcript regulated by Nrg1 and Mig1; induced by prostaglandins
orf19.7286	CR_08910C_A	RPN7	RPN7	NA	-0.441608	0.000682098	Subunit of the proteasome regulatory particle; regulated by Gcn2p and Gcn4p; protein present in exponential and stationary growth phase yeast cultures
snR48	C2_02080W_A		NA	NA	-1.07987	0.000682098	C/D box small nucleolar RNA (snoRNA)
orf19.1150	C1_11690W_A		NA	NA	-0.779332	0.000686644	GATA-like transcription factor; oral infection induced; mutant has reduced capacity to damage oral epithelial cells; regulated by Gcn2 and Gcn4; Spider biofilm induced
orf19.6316	CR_04760C_A		YMR221C	NA	-0.422719	0.000686644	Predicted membrane transporter, member of the L-amino acid transporter-3 (LAT3) family, major facilitator superfamily (MFS)
orf19.1438	C4_03340C_A		NA	NA	0.948413	0.000687563	Protein with homology to NADH dehydrogenase; regulated by Sef1p-, Sfu1p-, and Hap43p
orf19.6910	C7_01300C_A	PSF1	PSF1	NA	-0.993159	0.000688707	Putative GINS complex subunit which is localized to DNA replication origins; implicated in assembly of the DNA replication machinery; flow model biofilm induced
orf19.7033	C7_00840C_A		PPS1	NA	0.664469	0.000690219	Putative dual specificity protein phosphatase, similar to S. cerevisiae Pps1p
orf19.3956	C5_04710W_A		HER2	NA	0.427812	0.000699354	Protein of unknown function
orf19.4866	C1_10000C_A	CPP1	MSG5	NA	0.541298	0.000699354	VH1 family MAPK phosphatase; regulates Cst20-Hst7-Cek1-Cph1 filamentation pathway; represses yeast-hyphal switch; required for virulence in mice; yeast-enriched; induced by alpha pheromone in SpiderM medium; Spider biofilm induced
orf19.7157	C7_04170W_A		NA	NA	0.999516	0.000700233	Protein with a tubulin binding cofactor C domain; flow model biofilm induced
orf19.4865	C1_09990W_A	SAC1	NA	NA	-0.824949	0.000707821	Protein of unknown function
orf19.7348	C3_05670C_A		NA	NA	-0.771682	0.000709724	Protein of unknown function
orf19.2915	C4_06230C_A		YND1	NA	0.464414	0.000712706	Protein of unknown function
orf19.5627	C6_03380W_A		HEK2	NA	-0.441186	0.000714022	S. cerevisiae ortholog Hek2/Khd1 is a putative RNA binding protein involved in the asymmetric localization of ASH1 mRNA; Hap43-induced gene
orf19.262	C3_02700W_A	SMC3	SMC3	NA	-1.00652	0.000720994	Protein similar to S. cerevisiae Smc3p, which is an ATPase involved in sister chromatid cohesion; likely to be essential for growth, based on an insertional mutagenesis strategy
orf19.3759	C1_12570C_A		ELP4	NA	-0.582921	0.000720994	Putative elongator complex subunit; for modification of wobble nucleosides in tRNA; Spider biofilm induced
orf19.1480	C2_01690W_A		SHH3	NA	-0.399151	0.000721112	Putative succinate dehydrogenase; enzyme of citric acid cycle; repressed by nitric oxide; Efg1, Hap43 repressed
orf19.6324	C6_00130C_A	VID27	VID27	NA	-0.517981	0.000725706	Protein similar to S. cerevisiae Vid27p; transposon mutation affects filamentous growth; mutation confers hypersensitivity to toxic ergosterol analog; fungal-specific (no human or murine homolog)
orf19.3811	C4_04710W_A	GYP1	GYP1	NA	-0.58052	0.000725924	Putative Cis-golgi GTPase-activating protein; transcript regulated by Nrg1, Mig1, and Tup1
orf19.5017	C1_13800C_A	DUR32	NA	NA	0.956912	0.000735473	Putative urea transporter; possibly an essential gene, disruptants not obtained by UAU1 method
orf19.245	C3_02560W_A	DDC1	DDC1	NA	0.718752	0.000737766	Putative DNA damage checkpoint protein; transcript induced during filamentous growth; regulated by Nrg1, Tup1
orf19.544.1	CR_04550W_A	PRE6	PRE6	NA	-0.937783	0.000741065	Putative alpha-4 subunit of the proteasome; reported as macrophage-induced protein and macrophage/pseudohyphal-repressed gene; regulated by Gcn2p and Gcn4p; removed from/reinstated in Assembly 20 (see Locus History)
orf19.6200	C1_07040C_A		NA	PRY2	1.28556	0.000749553	Pry family pathogenesis-related protein; oral infection upregulated gene; mutant has reduced capacity to damage oral epithelial cells
orf19.1669	C3_01760W_A	AFG3	AFG3	NA	0.511289	0.00075581	Similar to S. cerevisiae Afg3p, a subunit of the mitochondrial inner membrane m-AAA protease; likely to be essential for growth, based on an insertional mutagenesis strategy
orf19.6465	C7_02430C_A		NA	NA	-0.927394	0.000758424	Protein of unknown function
orf19.2961	C1_02720W_A		NA	NA	0.499201	0.000766464	Putative transcription factor with zinc finger DNA-binding motif
orf19.1795.1	C4_05380C_A		SPC1	NA	-0.738353	0.000766798	Protein of unknown function
orf19.229	C3_02410C_A		PSH1	NA	-0.771053	0.000770939	Protein of unknown function
orf19.1677	C3_01670W_A		NA	NA	-0.577843	0.000782502	Protein of unknown function; transcript detected on high-resolution tiling arrays
orf19.633	CR_04960C_A	CRG1	NA	NA	-0.86368	0.000787105	Methyltransferase involved in sphingolipid homeostasis, methylates a drug cantharidin; decreased expression in hyphae compared to yeast; expression regulated during planktonic growth; flow model biofilm induced; Hap43-repressed gene
orf19.3153	C3_01160W_A	MSS4	MSS4	NA	0.392131	0.000801578	Phosphatidylinositol-4-phosphate 5-kinase; activity induced by phosphatidic acid (Pld1 product); macrophage/pseudohyphal-repressed; mRNA binds to She3, localized to yeast cell buds and hyphal tips; Hap43-induced; Spider biofilm induced
orf19.2106	C2_00270C_A		YLR326W	NA	-0.661597	0.000811151	Putative protein of unknown function; Hap43p-repressed gene
orf19.1906	C2_00130W_A		NA	NA	-0.654802	0.000811838	Protein of unknown function; flow model biofilm induced
orf19.2739	C4_02600C_A		RLF2	NA	0.597887	0.000815767	Protein of unknown function
orf19.1949	C5_01210W_A	VPS1	VPS1	NA	0.63859	0.000815814	Dynamin-family GTPase-related protein; induced upon adherence to polystyrene; regulated by Gcn2p and Gcn4p
orf19.1360	C2_09920W_A		RRG9	NA	0.799169	0.000819625	Protein of unknown function
orf19.4437	C1_07340W_A		NA	NA	-0.53934	0.000819625	Protein of unknown function
orf19.7513	CR_00210W_A	ALK2	NA	NA	-0.720754	0.000823186	N-Alkane inducible cytochrome P450
orf19.4474	C1_03990W_A		CUZ1	NA	-0.815287	0.000823989	Protein of unknown function
orf19.1712	C3_01390C_A	GEA2	GEA2	NA	-0.404766	0.000828237	Putative ARF GTP/GDP exchange factor; induced in low iron; flow model biofilm repressed
orf19.1227	C1_07670W_A	ZCF4	NA	NA	1.34189	0.000833377	Putative Zn(II)2Cys6 transcription factor
orf19.3693	C1_02360C_A	PGA5	GAS2	NA	0.809769	0.000833377	Putative GPI-anchored beta-1,3-glucanosyltransferase with similarity to the A. fumigatus GEL family; fungal-specific (no human or murine homolog)
orf19.1634	C3_02120W_A		NA	NA	-0.468763	0.000842291	Protein of unknown function
orf19.798	C2_04220C_A	TAF14	TAF14	NA	-0.988165	0.000854348	Putative DNA-binding transcription factor; TFIIF subunit; macrophage-induced protein; possibly required for yeast cell adherence to silicone substrate; mutant has pleiotrophic effects
orf19.6045	C1_00610W_A	PSD1	NA	NA	-0.370353	0.000857838	Putative phosphatidylserine decarboxylase; involved in phosphatidylethanolamine; Spider biofilm repressed
orf19.1317	C4_03590C_A	OSH3	OSH3	NA	0.506346	0.000861353	Protein required for wild-type filamentation; has oxysterol binding protein domain and pleckstrin homology motif; overproducton suppresses cph1 homozygous null filamnetation defect; similar to S. cerevisiae Osh3p
orf19.4837	C1_09730W_A	DAM1	DAM1	NA	-0.419004	0.000880077	Essential subunit of the Dam1 (DASH) complex, which acts in chromosome segregation by coupling kinetochores to spindle microtubules
orf19.6452	C7_02570C_A	RBP1	FPR1	NA	-1.07621	0.000880077	Peptidyl-prolyl cis-trans isomerase; rapamycin-binding protein; homozygous null mutation confers rapamycin resistance; regulated by Gcn4p; macrophage-induced protein; repressed in response to 3-AT; functional homolog of S. cerevisiae Rbp1p
orf19.7198	C7_03840W_A		CAF40	NA	-0.379444	0.000891709	CCR4-NOT complex component; involved in controlling mRNA initiation, elongation and degradation; rat catheter biofilm induced
orf19.4766	C1_09090C_A	ARG81	ARG81	NA	-0.489056	0.000896061	Zn(II)2Cys6 transcription factor; required for utilization of ornithine as a nitrogen source and for wild-type resistance to caffeine; required for yeast cell adherence to silicone substrate
orf19.2800	C1_07530W_A		NA	NA	-0.859177	0.000896492	Protein of unknown function
orf19.121	C6_01140C_A	ARC18	ARC18	NA	-0.979553	0.000903595	Putative ARP2/3 complex subunit; mutation confers hypersensitivity to cytochalasin D
orf19.1925	C2_00010W_A	TLO5	NA	NA	-0.411765	0.000903595	Member of a family of telomere-proximal genes of unknown function; may be spliced in vivo
orf19.2335	C1_10820C_A		APE4	NA	-0.693073	0.000903595	Putative aspartyl aminopeptidase; stationary phase enriched protein; mutation confers hypersensitivity to 5-fluorouracil (5-FU); Hog1-induced; planktonic growth-induced; rat catheter and Spider biofilm repressed
orf19.3234	CR_01200W_A	OYE22	NA	OYE3	0.606439	0.000903595	Putative NADPH dehydrogenase; rat catheter biofilm induced
orf19.6977	C3_05390C_A	GPI1	GPI1	NA	-0.757017	0.000916298	Putative protein of GPI synthesis; expression is reduced in a fluconazole-resistant isolate
orf19.964	C5_00300C_A	SMC4	SMC4	NA	0.361512	0.00092593	Protein of unknown function
orf19.4054	C5_05500C_A	CTA24	NA	NA	-0.513251	0.000928122	Putative transcription factor; positive regulator of gene expression; Efg1-repressed; member of a family of telomere-proximal genes; transcript upregulated in RHE model of oral candidiasis
orf19.1782.1	C2_10000C_A		NA	NA	1.10574	0.000929747	Protein of unknown function
orf19.3690.2	C1_02330C_A		RPL26B	NA	-1.3391	0.000932831	Ribosomal 60S subunit protein; Spider biofilm repressed
orf19.2067	C2_00600C_A		NFU1	NA	-0.715117	0.00094012	Protein with a predicted role in mitochondrial iron metabolism; Hap43-repressed; expression upregulated during growth in the mouse cecum; Spider biofilm induced
orf19.5847	CR_05550C_A		RET1	NA	0.733116	0.000940655	Protein of unknown function
orf19.2693	C4_02990C_A	GST2	NA	NA	-0.864141	0.000940911	Glutathione S transferase; induced by benomyl and in populations of cells exposed to fluconazole over multiple generations; regulated by Nrg1, Tup1; induced by nitric oxide; stationary phase enriched; Spider biofilm induced
orf19.5259	C1_12060C_A		NA	NA	0.713906	0.000944356	Protein of unknown function
orf19.7247	C1_14340C_A	RIM101	NA	NA	-0.567506	0.000946351	Transcription factor; alkaline pH response; required for alkaline-induced hyphal growth; role in virulence in mice; activated by C-terminal proteolytic cleavage; mediates both positive and negative regulation; Spider biofilm induced
orf19.5132	C7_03230C_A		NA	NA	-0.743949	0.000949248	Protein of unknown function; transcript detected on high-resolution tiling arrays; Spider biofilm induced
orf19.6030	C1_00760W_A		NA	NA	0.32057	0.000954028	Protein of unknown function; transcript detected on high-resolution tiling arrays
orf19.974	C5_00220W_A	ROT2	ROT2	NA	-0.747719	0.000954028	Alpha-glucosidase II, catalytic subunit, required for N-linked protein glycosylation and normal cell wall synthesis; alkaline downregulated
orf19.6061	C1_00470C_A		FMP30	NA	-0.575426	0.000954883	Protein of unknown function
orf19.2994	C1_03020C_A	RPL13	RPL13A	NA	-0.503511	0.000956287	Putative ribosomal subunit; antigenic during murine infection; downregulated upon phagocytosis by murine macrophage; Spider biofilm repressed
orf19.4931.1	C1_13050W_A	RPL14	RPL14B	NA	-0.598818	0.000956287	Ribosomal protein L14; promoter bound directly by Tbf1p; Hap43p-induced gene
orf19.7215.3	C1_14090W_A		HSP10	NA	1.33222	0.00095939	Protein of unknown function
orf19.3846	C4_04410C_A	LYS4	LYS4	NA	-0.439999	0.000973036	Homoaconitase; regulated by Gcn4, Gcn2; induced in response to amino acid starvation (3-AT); induced by human whole blood or PMNs; Hap43-repressed; flow model and Spider biofilm repressed
orf19.3365	C4_03380C_A	DAO2	NA	NA	0.515786	0.000976212	Putative D-amino acid oxidase; rat catheter biofilm induced
orf19.4257	C5_02470W_A	INT1	BUD4	NA	-0.487577	0.000977497	Protein structurally similar to alpha-subunit of human leukocyte integrin; role in morphogenesis, adhesion, and mouse cecal colonization and systemic virulence; similar to S. cerevisiae Bud4; Hap43-induced gene
orf19.4077	C2_09150W_A	MIT1	SUR1	NA	0.588359	0.000978541	Mannosylinositol phosphorylceramide (MIPC) synthase catalytic subunit; sphingolipid biosynthesis; fluconazole, caspofungin induced; macrophage-repressed; Spider biofilm induced
orf19.5505	C7_03720C_A	HIS7	HIS7	NA	0.375739	0.000978541	Putative imidazole glycerol phosphate synthase; histidine biosynthesis; no human/murine homolog; transcription induced by histidine starvation; regulated by Gcn2p and Gcn4p; higher protein level in stationary phase
orf19.6077	C1_00310W_A		PNS1	NA	-0.80574	0.00098028	Putative protein of unknown function; shows colony morphology-related gene regulation by Ssn6p
orf19.2351	C1_10700C_A	NIT3	NIT3	NA	0.451974	0.00098061	Putative nitrilase; regulated by Gcn2p and Gcn4p; protein present in exponential and stationary growth phase yeast cultures
orf19.988	C1_10460W_A		NA	NA	-0.558157	0.00098061	Protein of unknown function; oral infection upregulated gene; upregulated in strains from HIV+ patients with oral candidiasis; mutants have reduced ability to damage oral epithelial cells; transcript possibly regulated upon hyphal formation
orf19.1093	C6_04350C_A	FLO8	FLO8	NA	-0.524623	0.000982491	Transcription factor; required for hyphal formation and CO2 induced white-opaque switching; regulates hyphal gene expression; required for virulence in mouse systemic infection; binds Efg1p; binds Mss11p via LisH motif; has LUFS domain
orf19.5992	C3_05170W_A	WOR2	NA	NA	-0.572662	0.000994335	Zn(II)2Cys6 transcription factor; regulator of white-opaque switching; required for maintenance of opaque state; Hap43-induced
orf19.2956	C1_02660C_A	MGM101	MGM101	NA	0.498322	0.000999367	Putative mitochondrial genome maintenance protein; fungal-specific (no human or murine homolog); mutation confers hypersensitivity to tubercidin (7-deazaadenosine)
orf19.757.1	C1_04850C_A		NA	NA	-0.712296	0.00100491	Protein of unknown function
orf19.5994	C3_05180W_A	RHB1	RHB1	NA	0.44858	0.00100533	Putative small G protein from the Ras superfamily involved in cell wall integrity and control of filamentous growth under nitrogen starvation
orf19.2422	CR_03060W_A	ARC1	ARC1	NA	-0.367956	0.00100659	Putative G4 nucleic acid binding protein; macrophage/pseudohyphal-repressed; protein enriched in stationary phase yeast-form cultures; Spider biofilm repressed
orf19.4953	C1_13270W_A		POF1	NA	-0.686216	0.001014	Putative ATPase; predicted role in ER-associated protein catabolism; induced during chlamydospore formation in both C. albicans and C. dubliniensis; rat catheter biofilm repressed
orf19.4426	C1_07420C_A	PEX3	PEX3	NA	0.40152	0.00101939	Putative peroxisomal protein involved in targeting proteins into peroxisomes; possibly an essential gene, disruptants not obtained by UAU1 method
orf19.4086	C2_09250W_A		OCA2	NA	0.431371	0.00103162	Protein of unknown function
orf19.6017	C1_00880W_A		NA	NA	-0.8771	0.00103162	Protein of unknown function; Spider biofilm induced
orf19.1581	C2_02560W_A		NA	NA	2.01896	0.00103469	Planktonic growth-induced gene
orf19.4629	C4_01560C_A		BUL1	NA	0.516401	0.00105173	Protein of unknown function
orf19.7449	C3_06600C_A		DML1	NA	0.724314	0.00105173	Protein of unknown function
orf19.5171	C7_02890C_A	PMT1	PMT1	NA	0.436775	0.00105299	Protein mannosyltransferase; required for virulence in mice and for adhesion to epithelial cells; role in hyphal growth and drug sensitivity; Als1, Sec20, Kre9, Pir1 are substrates; 1 of 5 PMT family members
orf19.1484	C2_01730W_A		SPC24	NA	-1.02714	0.00105623	Ortholog of S, cerevisiae Spc24; a component of the conserved kinetochore-associated Ndc80 complex involved in chromosome segregation, spindle checkpoint activity and kinetochore clustering; Hap43-induced gene
orf19.1121	C5_03740W_A		NA	NA	-0.868059	0.00105738	Protein of unknown function
orf19.4295	C5_02750C_A		HIR2	NA	-0.393326	0.0010724	Protein of unknown function
orf19.7292	CR_08950W_A	ARP2	ARP2	NA	-0.527383	0.00108246	Component of the Arp2/3 complex; required for virulence, hyphal growth, cell wall/cytoskeleton organization, not for endocytosis; mutation confers hypersensitivity to cytochalasin D; regulated by Gcn2 and Gcn4; Spider biofilm repressed
orf19.5838	C2_02690W_A	SER2	SER2	NA	-0.63822	0.00108327	Protein of unknown function
orf19.993	C1_10500W_A		NA	NA	0.625897	0.00108327	Protein of unknown function; rat catheter biofilm repressed
snR87	C1_13040C_A		NA	NA	-1.57167	0.00108623	H/ACA box small nucleolar RNA (snoRNA)
orf19.6909	C7_01290W_A	MED11	MED11	NA	-0.599646	0.00108835	Protein of unknown function
orf19.2957	C1_02670C_A		NA	NA	1.67305	0.00109181	Protein required for transfer of mannosylphosphate; induced by alpha pheromone in SpiderM medium
orf19.227	C3_02400C_A	COX7	COX7	NA	-1.07935	0.00110215	Putative cytochrome c oxidase; flucytosine induced; repressed by nitric oxide
orf19.4679	C4_01100C_A	AGP2	AGP2	NA	-0.726711	0.00111885	Amino acid permease; hyphal repressed; white-opaque switch regulated; induced in core caspofungin response, during cell wall regeneration, by flucytosine; regulated by Sef1, Sfu1, and Hap43; rat catheter and Spider biofilm induced
orf19.6356	C1_12670C_A		PRP6	NA	0.726222	0.00111885	Protein of unknown function
orf19.1193	C6_00330C_A	GNP1	AGP1	NA	-0.349163	0.00112146	Similar to asparagine and glutamine permease; fluconazole, caspofungin induced; regulated by Nrg1, Mig1, Tup1, Gcn2, Gcn4, and alkaline regulated by Rim101; repressed during chlamydospore formation; rat catheter, flow model biofilm induced
orf19.5492	C2_06300W_A		YHC1	NA	-0.466501	0.00112338	Protein of unknown function
orf19.5074	C1_08020W_A	UBA2	UBA2	NA	-0.482709	0.00114669	Protein of unknown function
orf19.5035	C1_13970C_A	HPC2	HPC2	NA	0.523206	0.00115064	Protein of unknown function
orf19.2558	CR_01670W_A		NA	NA	-0.635252	0.00116093	Protein of unknown function
orf19.2245	C2_06910W_A	YPT72	YPT7	NA	-0.759943	0.00116313	Vacuolar Rab small monomeric GTPase involved in vacuolar biogenesis; involved in filamentous growth and virulence
orf19.5012	C1_13750C_A		NA	NA	0.695727	0.00116313	Protein of unknown function
orf19.288	C3_02950C_A	MET13	MET13	NA	-0.725535	0.00116611	Putative methionine biosynthesis protein; ketoconazole-induced; amphotericin B repressed; Spider biofilm repressed
orf19.6500	C7_02150C_A	ECM42	ARG7	NA	0.585675	0.00116847	Ornithine acetyltransferase; Gcn2, Gcn4-regulated; clade-specific gene expression; possibly essential gene, disruptants not obtained by UAU1 method; Spider biofilm induced
orf19.1957	C5_01130W_A	CYC3	CYC3	NA	0.456469	0.00118118	Mitochondrial cytochrome c heme lyase; antigenic cell-wall protein; filament induced; induced on polystyrene adherence, interaction with macrophage; N-glycosylation, 2 heme-binding motifs; rat catheter, Spider biofilm induced
orf19.4293	C5_02730C_A		CIA1	NA	0.493537	0.00118549	Protein of unknown function
orf19.3742	CR_02270C_A		NA	NA	-1.05366	0.0011916	Protein of unknown function; Spider biofilm induced; upregulated in a cyr1 null mutant
orf19.6763	C3_07310C_A	SLK19	YGR130C	NA	-0.594056	0.00119616	Alkaline-induced protein of plasma membrane; affects cell aggregation, cell wall; similar to S. cerevisiae Slk19p (a kinetochore protein with roles in mitosis, meiosis); required for wild-type virulence in mouse; macrophage-downregulated
snR189b	C2_04610C_A		NA	NA	-1.27147	0.00120062	H/ACA box small nucleolar RNA (snoRNA)
orf19.3009	C1_03170C_A		YDR179W-A	NA	0.880021	0.00120101	Protein of unknown function
orf19.7175	C7_04050W_A	HLJ1	HLJ1	NA	-0.406858	0.00120507	Putative HSP40 co-chaperone; repressed during the mating process
orf19.2768	C4_02360W_A	AMS1	AMS1	NA	0.663298	0.00120508	Putative alpha-mannosidase; transcript regulated by Nrg1; induced during cell wall regeneration; flow model biofilm induced; Spider biofilm induced
orf19.4579	C4_02120W_A	ERV29	ERV29	NA	0.518048	0.00120904	Putative SURF4 family member; plasma membrane-localized; flow model biofilm repressed
orf19.3738	CR_02290W_A	PGA22	NA	NA	-1.4886	0.00121166	Putative GPI-anchored protein; adhesin-like protein
orf19.6882.1	C2_05710C_A		RPL33A	NA	-1.27373	0.00124094	Ribosomal 60S subunit protein; Spider biofilm repressed
orf19.7341.1	CR_09460C_A		NA	NA	-0.463483	0.00124684	Protein of unknown function; Spider biofilm induced
orf19.2506	C3_01020W_A		NA	NA	-0.895441	0.00125733	Protein of unknown function; opaque-specific transcript; induced during chlamydospore formation in both C. albicans and C. dubliniensis; Hog1-repressed; Spider biofilm induced
orf19.3827	C4_04550C_A	OMA1	OMA1	NA	0.793189	0.00125733	Protein of unknown function
orf19.6623	CR_05910W_A		ELF1	NA	-1.0545	0.00125733	Protein of unknown function
orf19.2831	CR_02720C_A	RPC31	RPC31	NA	0.995016	0.0012626	Putative RNA polymerase III subunit C31; repressed by nitric oxide; induced during infection of murine kidney, compared to growth in vitro; has murine homolog
orf19.3762	C1_12540W_A		NA	NA	-1.04398	0.00126297	Protein of unknown function
orf19.6635	CR_05770W_A		NA	NA	-0.714641	0.00126297	Protein of unknown function
orf19.5691	C5_00070W_A	CDC11	CDC11	NA	0.365992	0.00126588	Septin; cell and hyphal morphology, agar-invasive growth, full virulence and kidney tissue invasion in mouse, but not kidney colonization, immunogenicity; hyphal and cell-cycle-regulated phosphorylation; rat catheter biofilm repressed
orf19.1587	C2_02610C_A	HGT20	NA	NA	-1.20437	0.00127782	Putative glucose transporter of the major facilitator superfamily; the C. albicans glucose transporter family comprises 20 members; 12 probable membrane-spanning segments; regulated by Nrg1
orf19.5417	C3_00480C_A	DOT5	DOT5	NA	-0.409536	0.00128365	Putative nuclear thiol peroxidase; alkaline downregulated; sumoylation target; Spider and flow model biofilm induced
orf19.5269.1	C1_11960C_A		YPR170W-B	NA	-0.439576	0.0012849	Protein of unknown function
orf19.4569	C4_02210W_A		NA	NA	1.98954	0.0012907	Protein of unknown function
orf19.2863.1	CR_03010C_A	ERV1	ERV1	NA	1.11205	0.00130923	Predicted component of the mitochondrial intermembrane space (IMS), involved in protein import into mitochondrial intermembrane space
orf19.4941	C1_13140C_A	TYE7	TYE7	NA	-0.492003	0.00131262	bHLH transcription factor; control of glycolysis; required for biofilm formation; hyphally regulated by Cph1, Cyr1; flucytosine, Hog1 induced; amphotericin B, caspofungin repressed; induced in flow model biofilm and planktonic cultures
orf19.5323	C2_10480W_A	MDH1-3	MDH3	NA	-0.513459	0.00131608	Predicted malate dehydrogenase; farnesol regulated; protein present in exponential and stationary growth phase yeast; Hap43p-repressed gene
orf19.2809	C3_04000C_A	CTN3	YAT2	NA	-1.13746	0.00132136	Peroxisomal carnitine acetyl transferase; no obvious metabolic, hyphal, virulence defects in Ura+ strain; induced by macrophage engulfment, hyphal growth, starvation, nonfermentable carbon sources; rat catheter, Spider biofilm induced
orf19.3198	C5_01770C_A	OBPA	OSH7	NA	-0.413489	0.00133696	Similar to oxysterol binding protein; non-sex gene located within the MTLa mating-type-like locus; Plc1p-regulated
orf19.7297	CR_09010C_A		YHR112C	NA	-0.574446	0.00134093	Putative cystathionine gamma-synthase; decreased levels in stationary phase cultures; Hog1p-induced; Gcn4p-regulated
orf19.6785	C3_07150C_A	RPS12	RPS12	NA	-0.87894	0.0013459	Acidic ribosomal protein S12; regulated by Gcn4, activated by Tbf1; repressed by amino acid starvation (3-AT); protein abundance is affected by URA3 expression in CAI-4 strain background; sumoylation target; Spider biofilm repressed
orf19.4231	C5_02240W_A	PTH2	NA	NA	0.982384	0.00134697	Putative cAMP-independent regulatory protein; constitutive expression independent of MTL or white-opaque status; Spider biofilm induced
orf19.4899	C1_10290W_A	GCA1	NA	NA	-1.02759	0.00134697	Extracellular/plasma membrane-associated glucoamylase; expressed in rat oral infection; regulated by carbohydrates, pH, galactose; promotes biofilm matrix formation; flow model biofilm induced; Bcr1 repressed in RPMI a/a biofilms
orf19.7372	C3_05920W_A	MRR1	NA	OAF3	0.571433	0.00134776	Putative Zn(II)2Cys6 transcription factor; regulator of MDR1 transcription; gain-of-function mutations cause upregulation of MDR1 (a plasma membrane multidrug efflux pump) and multidrug resistance; Hap43-induced
orf19.5980	C3_05090C_A		NA	NA	0.521253	0.00135451	Protein of unknown function; Hap43-repressed gene
orf19.3349	C1_01590C_A		NA	NA	-0.404978	0.0013552	Putative RNA polymerase II subunit B150; heterozygous null mutant exhibits resistance to parnafungin in the C. albicans fitness test
orf19.5802	C2_03000C_A		TSR3	NA	0.742428	0.00136193	Protein of unknown function
orf19.6255	C1_06560W_A		YGR117C	NA	0.391881	0.00136245	Putative protein of unknown function; Hap43p-repressed gene
orf19.1891	C2_07400C_A	2020-04-01	PEP4	NA	-0.748146	0.00136461	Vacuolar aspartic proteinase; transcript equivalent in yeast-form and mycelial cells but is elevated at lower growth temperatures; upregulated iby human neutrophils; protein enriched in stationary phase; Spider biofilm induced
orf19.4471	C1_03960C_A		VPS64	NA	-0.401464	0.00136743	Protein of unknown function
orf19.7288	CR_08920W_A		NA	NA	-0.520867	0.00136751	Protein with predicted oxidoreductase and dehydrogenase domains; Hap43-repressed; Spider biofilm induced
orf19.1179	C6_00200C_A		NA	NA	-0.561045	0.00136991	Protein of unknown function; induced in high iron; possibly subject to Kex2 processing; Hap43-repressed
orf19.6832	C3_06710W_A		VHC1	NA	-0.639	0.00137088	Protein of unknown function; regulated by Sef1p-, Sfu1p-, and Hap43p
orf19.948	C5_00410W_A		NA	NA	-0.975125	0.00137192	Protein of unknown function
orf19.6918	C7_01370W_A		NA	NA	0.649255	0.001377	Protein of unknown function; Hap43-induced gene; Spider biofilm induced
orf19.1777	C2_10050W_A		UBP15	NA	-0.489127	0.00137809	Protein of unknown function
orf19.2495	C1_05600W_A	GSL1	NA	FKS3	0.543987	0.00137809	Beta-1,3-glucan synthase subunit; 10 predicted transmembrane regions; caspofungin induced; repressed by yeast-to-hypha transition; young biofilm repressed, induced by biofilm drug exposure; Bcr1-repressed in RPMI a/a biofilms
orf19.6232	C1_06780W_A	NPR1	NA	NA	-0.538557	0.00139995	Predicted serine/threonine protein kinase, involved in regulation of ammonium transport; induced in core stress response; Hap43p-repressed gene
orf19.497	CR_04130C_A	EAF7	EAF7	NA	0.712483	0.00140297	Subunit of the NuA4 histone acetyltransferase complex
orf19.698	CR_06640C_A		ICE2	NA	-0.465621	0.00140393	Integral ER membrane protein; predicted role in maintenance of ER zinc homeostasis; Spider biofilm induced
orf19.3325.3	C1_01370C_A	RPS21B	RPS21B	NA	-1.20361	0.00141478	Ribosomal protein S21; regulated by Nrg1, Tup1; colony morphology-related gene regulation by Ssn6; positively regulated by Tbf1, Hap43; Spider biofilm repressed
orf19.388	C1_08430W_A	CAF16	CAF16	NA	-0.745175	0.00141609	ABC family protein, predicted not to be a transporter; Hap43, caspofungin repressed; rat catheter and Spider biofilm repressed
orf19.5959	C3_04900W_A	NOP14	NOP14	NA	1.03597	0.00141875	Putative nucleolar protein; Hap43-induced; mutation confers resistance to 5-fluorocytosine (5-FC), 5-fluorouracil (5-FU), and tubercidin (7-deazaadenosine); heterozygous mutant is resistant to parnafungin; Spider biofilm induced
orf19.3613	C2_08630C_A		PAF1	NA	-0.349052	0.0014291	Protein of unknown function
orf19.2972	C1_02840W_A	PDE2	PDE2	NA	-0.611381	0.00143768	High affinity cyclic nucleotide phosphodiesterase; moderates signaling by cAMP; required for virulence, switching, cell wall, hyphal, not pseudohyphal growth; expressed shortly after hyphal induction; rat catheter and Spider biofilm induced
orf19.6047	C1_00590W_A	TUF1	TUF1	NA	0.823489	0.0014521	Translation elongation factor TU; macrophage/pseudohyphal-induced; repressed upon phagocytosis by murine macrophage; levels decrease in stationary phase cells; Spider biofilm repressed
orf19.2622	CR_07520C_A	YPT31	YPT32	NA	-0.38981	0.00145851	Protein required for resistance to toxic ergosterol analog
orf19.337	C3_03400C_A	VTI1	VTI1	NA	-0.482256	0.00147353	Protein of unknown function
orf19.5468	C3_00050C_A		NA	NA	-0.76015	0.00148396	Predicted ORF from Assembly 19; removed from Assembly 20; restored based on transcription data; almost identical to orf19.6113, orf19.4055, orf19.5370
orf19.1427	C4_04230W_A		THI73	NA	0.523252	0.00148782	Putative transporter; fungal-specific; Spider biofilm induced
orf19.53	C1_04990C_A		NA	NA	-0.381317	0.00150846	Protein of unknown function
snR47	C2_10800W_A		NA	NA	-1.22259	0.00151035	C/D box small nucleolar RNA (snoRNA)
orf19.6444	CR_08680C_A		NPR3	NA	-0.721676	0.00151592	Protein of unknown function
orf19.3940.1	C5_04560C_A	CUP1	NA	NA	-1.09823	0.00152007	Metallothionein; involved in copper resistance; copper induced; Spider biofilm induced; flow model biofilm repressed
orf19.7539.1	CR_00040C_A		NA	NA	-0.441003	0.00153407	Putative adhesin-like protein; transcription detected in high-resolution tiling array experiments
orf19.6261	C1_06520C_A	BPH1	BPH1	NA	-0.572513	0.001548	Ortholog of S. cerevisiae Bph1; a putative ortholog of human Chediak-Higashi syndrome protein and murine beige gene implicated in disease syndromes involving defective lysosomal trafficking; mutant is viable
orf19.3526	C2_04940C_A	ITR1	ITR2	NA	0.525875	0.00156014	MFS inositol transporter; uptake of exogenous inositol; 12 transmembrane motifs; expressed in rich medium; fluconazole, caspofungin repressed; possibly essential (UAU1 method); flow model, rat catheter and Spider biofilm induced
orf19.6440	CR_08650C_A		ASI3	NA	-0.393621	0.00156181	Protein of unknown function
orf19.6596	CR_09670C_A		NA	NA	-0.449248	0.00156419	Putative esterase; possibly transcriptionally regulated by Tac1; induced by Mnl1 under weak acid stress; protein present in exponential and stationary growth phase yeast cultures; Spider biofilm repressed
orf19.7022	C7_00920C_A		NA	NA	-0.943303	0.00157358	Protein of unknown function
orf19.954	C5_00350C_A		XDJ1	NA	0.554586	0.00157493	Putative DnaJ-like chaperone; Hap43-repressed gene
orf19.840	C2_03810C_A	RPL21A	RPL21A	NA	-0.539791	0.00159884	Putative ribosomal protein; repressed upon phagocytosis by murine macrophage; Spider biofilm repressed
orf19.4748	C1_08890C_A		MSL1	NA	-0.876439	0.00160119	Putative U2B'' component of the U2 snRNP, involved in splicing; contains an RNA recognition motif (RRM); ortholog of S. cerevisiae MSL1; Hap43p-induced gene
orf19.5220	C1_12440W_A		REX4	NA	1.5129	0.00160488	Putative RNA exonuclease; induced in a ssr1 null mutant
orf19.3042	C1_03410W_A		NA	NA	-0.988275	0.00160495	Protein of unknown function; Hap43-induced; rat catheter biofilm induced
orf19.6032	C1_00740C_A	SPE1	SPE1	NA	-0.469807	0.00161264	Ornithine decarboxylase; enzyme of polyamine biosynthesis; mutant is viable; functionally complements polyamine auxotrophy of S. cerevisiae spe1 mutant; downregulated upon adherence to polystyrene
orf19.5288.1	CR_05330W_A		NA	NA	-0.493574	0.0016132	Protein of unknown function; Spider biofilm repressed
orf19.4318	C5_02940C_A	MIG1	MIG1	NA	-0.604845	0.00161544	C2H2 transcription factor; repressor; regulates genes for carbon source utilization; Tup1-dependent and independent functions; hyphal, Hap43 and caspofungin repressed; Spider and flow model biofilm induced
orf19.5157	C7_03040W_A		NA	NA	-0.515597	0.00161544	Protein with a protein tyrosine phosphatase-like protein domain; putative membrane-spanning regions; rat catheter biofilm induced
orf19.4309	C5_02860C_A	GRP2	NA	NA	-0.818914	0.00162736	Methylglyoxal reductase; regulation associated with azole resistance; induced in core stress response or by oxidative stress via Cap1, fluphenazine, benomyl, by Hap43 or with long term fluconazole treatment; Spider biofilm induced
orf19.5292	C4_04170C_A	AXL2	AXL2	NA	0.587658	0.00164711	Ortholog of S. cerevisiae Axl2; a plasma membrane protein involved in determination of budding pattern; O-glycosylated by Pmt4; mutant is viable
orf19.1321	C4_03570W_A	HWP1	NA	NA	1.23731	0.00165027	Hyphal cell wall protein; host transglutaminase substrate; opaque-, a-specific, alpha-factor induced; at MTLa side of conjugation tube; virulence complicated by URA3 effects; Bcr1-repressed in RPMI a/a biofilms; Spider biofilm induced
orf19.2848	CR_02910W_A		ATG13	NA	0.721265	0.00165372	Predicted regulatory subunit of the Atg1 signaling complex; required for vesicle formation during autophagy and the cytoplasm-to-vacuole targeting (Cvt) pathway; Spider biofilm induced
orf19.7056	C7_00630C_A		NA	DIP5	1.02214	0.00166294	Putative protein of unknown function; transcript is upregulated in clinical isolates from HIV+ patients with oral candidiasis; regulated by Sef1, Sfu1, and Hap43
orf19.7244	C1_14320C_A		FMP41	NA	-0.728296	0.00166959	Putative fumarylacetoacetate hydrolase; induced by nitric oxide independent of Yhb1; regulated by Sef1, Sfu1, Hap43; flow model biofilm induced
orf19.2026	C2_00970C_A	UBP13	UBP13	NA	-0.642569	0.00167955	Ortholog of S. cerevisiae Ubp13; putative ubiquitin carboxyl-terminal hydrolase; flow model biofilm induced; rat catheter biofilm repressed
orf19.7517	CR_00180C_A	CHT1	NA	NA	0.89893	0.00169042	Chitinase; putative N-terminal catalytic domain; has secretory signal sequence; lacks S/T region and N-glycosylation motifs of Chs2p and Chs3p; alkaline downregulated; expression not detected in yeast-form or hyphal cells
orf19.6313	CR_04800W_A	MNT4	NA	NA	-0.487505	0.0016918	Predicted alpha-1,3-mannosyltransferase with a role in protein glycosylation; induced in low iron
orf19.2415	CR_03110W_A		MSE1	NA	0.928153	0.00170058	Protein of unknown function
orf19.4427	C1_07410C_A	SKP1	SKP1	NA	-0.988512	0.00170441	Putative subunit D of kinetochore protein complex CBF3; regulated by Gcn4p; repressed in response to amino acid starvation (3-aminotriazole treatment)
orf19.1082	C6_04240W_A		NA	NA	0.815539	0.00170676	Protein with an Alba DNA/RNA-binding protein domain; Spider biofilm induced
orf19.5943.1	C3_04810C_A		STM1	NA	-0.426048	0.00172189	Protein of unknown function; transcript upregulated in an RHE model of oral candidiasis; rat catheter and Spider biofilm repressed
orf19.861	C2_03590C_A	CAP4	NA	NA	-0.608592	0.00172189	Predicted bZip transcription factor; possibly an essential gene, disruptants not obtained by UAU1 method
orf19.5630	C6_03410C_A	APA2	APA2	NA	-0.603745	0.00172288	Putative ATP adenylyltransferase II; regulated by Gcn4; repressed by amino acid starvation (3-AT); induced by prostaglandins; Hap43-repressed; Spider biofilm repressed
orf19.7544	CR_00020W_A	TLO1	NA	NA	-0.533217	0.00173283	Member of a family of telomere-proximal genes of unknown function; hypha-induced expression; rat catheter biofilm repressed
orf19.6639	CR_05730C_A		MDM36	NA	-0.531269	0.00173782	Ortholog of S. cerevisiae Mdm36; mitochondrial distribution and morphology protein; Hap43-repressed gene
orf19.4116	C2_06040C_A		SLI1	NA	0.576028	0.00174793	Protein of unknown function
orf19.6640	CR_05720W_A	TPS1	TPS1	NA	-0.518356	0.00174934	Trehalose-6-phosphate synthase; role in hyphal growth and virulence in mouse systemic infection; induced in presence of human neutrophils; macrophage/pseudohyphal-repressed after 16h; stationary phase enriched protein; Hap43-repressed
orf19.4040	C5_05410C_A	ILV3	ILV3	NA	-0.501384	0.00176004	Dihydroxyacid dehydratase; repressed by nitric oxide; macrophage-induced protein; protein in exponential and stationary growth phase; Sef1, Sfu1p, Hap43-regulated; farnesol-repressed; flow model biofilm induced; Spider biofilm repressed
orf19.1426	C4_04240C_A		SKG6	NA	0.448719	0.00176214	Ortholog of S. cerevisiae Skg6; localizes to the cell cortex, cell bud neck, cell bud tip, incipient cellular bud site, and is membrane-bound; Spider biofilm induced
orf19.6929	C3_03860W_A		YER134C	NA	0.624096	0.00176243	Protein of unknown function
orf19.5928	C3_04680W_A	RPP2B	RPP2B	NA	-1.06373	0.00178585	Conserved acidic ribosomal protein; possibly involved in regulation of translation elongation; interacts with Rpp1A; 1 of 4 similar C. albicans proteins (Rpp1A, Rpp1B, Rpp2A, Rpp2B); macrophage/pseudohyphal-induced; Spider biofilm repressed
orf19.3656	C6_00720C_A	COX15	COX15	NA	1.06953	0.00179081	Cytochrome oxidase assembly protein; transcript regulated by Nrg1 and Tup1; alkaline repressed; Hap43-repressed; early-stage flow model biofilm induced; Spider biofilm repressed
orf19.1084	C6_04270W_A	CDC39	CDC39	NA	-0.343813	0.00180606	Protein similar to S. cerevisiae Cdc39p, which is part of the CCR4-NOT transcription regulatory complex; transposon mutation affects filamentous growth
orf19.2667	C4_03270W_A	RPF1	RPF1	NA	1.0012	0.00182625	Putative nucleolar protein with a predicted role in the assembly and export of the large ribosomal subunit; essential for growth; rat catheter and Spider biofilm induced
orf19.3234.1	CR_01190C_A	SFT1	SFT1	NA	-0.960517	0.00186353	Putative Golgi v-SNARE; Plc1-regulated; Spider biofilm induced
orf19.4430	C1_07390W_A		UBX5	NA	-0.453109	0.00186572	Protein of unknown function
orf19.407	C1_08600C_A	GCD6	NA	NA	-0.433483	0.00187249	Ortholog of S. cerevisiae Gcd6; catalytic epsilon subunit of the translation initiation factor eIF2B; genes encoding translation factors are repressed by phagocytosis by murine macrophages
orf19.4247	C5_02390C_A		NA	NA	-0.420447	0.00188185	Protein of unknown function; rat catheter and Spider biofilm repressed
orf19.6578	C7_01510W_A		NA	NA	-1.18934	0.00189155	Predicted membrane transporter; vesicular neurotransmitter (VNT) family, major facilitator superfamily (MFS); repressed in core caspofungin response; induced in oralpharyngeal candidasis; Spider biofilm induced
orf19.7414	C3_06190C_A	ALS6	NA	SAG1	0.872076	0.00189189	ALS family protein; expression in S. cerevisiae confers adhesion to gelatin; macrophage-induced gene; N-terminal adhesion domain; ALS family includes cell-surface glycoproteins, some with adhesin function
orf19.4817	C1_09530W_A	RAM2	RAM2	NA	-0.471887	0.00189501	Alpha subunit of heterodimeric protein geranylgeranyltransferase type I and farnesyltransferase; a-specific transcript; lovastatin, fluconazole regulated; GGTase I binds zinc, is Mg-dependent; Cdc42 substrate; rat catheter biofilm repressed
orf19.260	C3_02680C_A	SLD1	NA	NA	-0.576536	0.00190116	Sphingolipid delta-8 desaturase; catalyzes desaturation at C8 in the long-chain base moiety of ceramides in glucosylceramide synthesis, important for virulence; ketoconazole and hypoxia induced; Hap43-repressed; Spider biofilm induced
orf19.6282	CR_07680C_A		NA	NA	-0.493673	0.00190259	Protein of unknown function
orf19.2252	C2_06980W_A		NA	NA	2.52942	0.0019052	Protein of unknown function; rat catheter biofilm repressed
orf19.4534	C1_01890C_A		UBX7	NA	-0.545119	0.00190851	Putative UBX-domain (ubiquitin-regulatory domain) protein; macrophage-downregulated gene
orf19.1729	C3_01220W_A		NA	NA	0.632846	0.00190866	Putative transcription factor with zinc finger DNA-binding motif
orf19.3498	C6_02110W_A		NA	NA	0.615718	0.00190937	Protein of unknown function
orf19.1280	C5_04090C_A	SUI1	NA	NA	-1.01513	0.00191558	Putative translation initiation factor; flucytosine induced; genes encoding ribosomal subunits, translation factors, and tRNA synthetases are downregulated upon phagocytosis by murine macrophage
orf19.2003	C2_01210C_A	HNM1	NA	NA	-0.575104	0.00192012	Putative choline/ethanolamine transporter; mutation confers hypersensitivity to toxic ergosterol analog; colony morphology-related gene regulation by Ssn6; clade-associated gene expression
orf19.334	C3_03370C_A		NA	NA	-0.660849	0.0019213	Protein of unknown function; flow model biofilm induced; Spider biofilm induced; regulated by Sef1, Sfu1, and Hap43
orf19.1120	C5_03750W_A	FAV2	NA	NA	-0.728408	0.00193435	Adhesin-like protein; induced by mating factor in MTLa/a opaque cells, in cyr1 null, in filaments; regulated by Nrg1, Rfg1, Tup1, Tec1, Efg1, Ntd80, Rob1, Brg1; induced in oralpharyngeal candidasis; Spider biofilm induced
orf19.2724	C4_02740W_A		NA	NA	-0.841551	0.00193435	Protein of unknown function; flow model, rat catheter and Spider biofilm induced; Hap43-repressed
orf19.2395	CR_03290C_A	IME2	IME2	NA	-1.1238	0.0019435	Putative serine/threonine protein kinase; mutation confers hypersensitivity to amphotericin B
orf19.1250	C4_05650W_A		NA	NA	0.643677	0.00194788	Protein of unknown function
orf19.1330	C7_03460W_A		NA	NA	0.700616	0.00196826	Protein of unknown function
orf19.863	C2_03560C_A		MRPL35	NA	0.943325	0.00197538	Protein of unknown function
orf19.5963	C3_04940W_A		NUS1	NA	-0.551687	0.00197611	Putative prenyltransferase; essential gene in S. cerevisiae; Spider biofilm induced
orf19.2070	C2_00570W_A		RSC58	NA	-0.550925	0.00199493	Protein of unknown function
orf19.4951	C1_13240W_A		NA	NA	-0.457689	0.0020017	Protein of unknown function; Spider biofilm induced
orf19.2810	C3_03990C_A	AAP1	NA	NA	1.09609	0.00200278	Putative amino acid permease; fungal-specific; possibly essential, disruptants not obtained by UAU1 method; Spider biofilm induced
orf19.6403.1	CR_08360C_A	RPP2A	RPP2A	NA	-0.602685	0.00201684	Acidic ribosomal protein; likely role in translation elongation regulation; interacts with Rpp1B; 1 of 4 similar ribosomal proteins (Rpp1A, Rpp1B, Rpp2A, Rpp2B); CUG start codon; upstream uORFs; Tbf1-induced; Spider biofilm repressed
orf19.1361	C2_09900C_A	TIM23	TIM23	NA	0.480701	0.00202064	Protein involved in mitochondrial matrix protein import
orf19.2685	C4_03070W_A	PGA54	NA	NA	0.605341	0.00202117	GPI-anchored protein; Hog1-repressed; induced in cyr1 or efg1 mutant or in hyphae; colony morphology-related gene regulation by Ssn6; induced in RHE model; mRNA binds She3; regulated in Spider biofilms by Tec1, Egf1, Ntd80, Rob1, Brg1
orf19.1716	C3_01350C_A	URA3	URA3	NA	0.569825	0.00202518	Orotidine-5'-phosphate decarboxylase; pyrimidine biosynthesis; gene used as genetic marker; decreased expression when integrated at ectopic chromosomal locations can cause defects in hyphal growth and virulence; Spider biofilm repressed
orf19.2936	C1_02470W_A		NA	NA	-0.663991	0.00202932	Protein of unknown function
orf19.5376	C3_00790W_A		ELM1	NA	0.645638	0.00203536	Ortholog of S. cerevisiae Elm1; a serine/threonine protein kinase that regulates cellular morphogenesis, septin behavior, and cytokinesis in S. cerevisiae; possibly an essential gene, disruptants not obtained by UAU1 method
orf19.6777	C3_07240W_A		NA	NA	1.89812	0.00203994	Protein of unknown function
orf19.3469	C6_02280W_A		STB1	NA	-0.778538	0.00204417	S. cerevisiae ortholog Stb1 has a role in regulation of MBF-specific transcription at Start; induced in a cyr1 null mutant; Spider biofilm induced
orf19.1344	C7_03310W_A		NA	NA	1.14251	0.00204493	Protein of unknown function; fluconazole-induced; Spider biofilm induced
orf19.1392	C2_09620W_A		EPS1	NA	0.546319	0.00204493	Protein of unknown function
orf19.5024	C1_13860C_A	GND1	GND1	NA	-0.522455	0.00204493	6-phosphogluconate dehydrogenase; soluble in hyphae; farnesol, macrophage-induced protein; antigenic in mice; dual localization to cytosol and peroxisomes depends on alternative splicing; rat catheter and Spider biofilm repressed
orf19.2259	C2_07030C_A		MRPL50	NA	0.768311	0.00205402	Protein of unknown function
orf19.3973	C5_04870W_A		HUA1	NA	-0.640445	0.00205402	Ortholog of Hua1, a zinc finger domain protein with sequence similarity to Type I J-proteins; flow model biofilm induced
orf19.4423	C1_07440W_A		YSP2	NA	-0.425318	0.00205402	Putative glucosyltransferase; localized to the mitochondrial membrane
orf19.4473	C1_03980W_A	SPC19	SPC19	NA	-0.609499	0.00205644	Essential subunit of the Dam1 (DASH) complex, which acts in chromosome segregation by coupling kinetochores to spindle microtubules
orf19.4403	C4_05910C_A	VPS11	PEP5	NA	0.504118	0.00208855	Protein involved in protein trafficking; putative role in vesicle-target membrane fusion; mutant lacks vacuole; role in hyphal growth, possibly via vacuole expansion into hypha; role in killing of and survival within macrophage
orf19.4924	C1_12950W_A		NA	NA	0.523958	0.00210927	Protein of unknown function; repressed in ssr1 mutant; Spider biofilm induced
orf19.5363	C2_10790C_A		ALG14	NA	-0.477969	0.00212134	Component of UDP-GlcNAc transferase; required for the 2nd step of dolichyl-linked oligosaccharide synthesis; Spider biofilm induced
orf19.5591	C6_03080C_A	ADO1	ADO1	NA	-0.562261	0.00212134	Adenosine kinase; heterozygous null mutant is resistant to cordycepin in C. albicans fitness test; ketoconazole-induced; protein level decrease in stationary phase cultures; sumoylation target; Spider biofilm repressed
orf19.2187	C2_07940C_A	ALG7	ALG7	NA	0.356339	0.00212772	Protein involved in cell wall mannan biosynthesis; mutation confers hypersensitivity to tunicamycin; transcript elevated in chk1, nik1, and sln1 homozygous null mutants; possibly essential gene, disruptants not obtained by UAU1 method
orf19.2995	C1_03040W_A		LOT5	NA	0.755052	0.00212772	Protein of unknown function; induced by nitric oxide; rat catheter and Spider biofilm induced
orf19.7019	C7_00950W_A	YML6	YML6	NA	0.557712	0.00212784	Putative mitochondrial ribosomal protein; induced upon adherence to polystyrene
orf19.138	C6_01310W_A	FIG1	FIG1	NA	1.17684	0.00214113	S. cerevisiae Fig1 ortholog; an integral membrane protein required for mating; role in thigmotropism; transcript is opaque-specific and a-specific; activated by Cph1 or alpha pheromone
orf19.4524	C1_02010C_A	ZCF24	NA	NA	0.649041	0.00214113	Predicted Zn(II)2Cys6 transcription factor; caspofungin induced; Hap43-repressed
orf19.6843	C1_04490W_A		NA	NA	0.28499	0.00214367	Protein of unknown function
orf19.6501	C7_02140W_A		NA	NA	1.08855	0.0021545	Protein of unknown function
orf19.3630	C2_08480W_A	RRP8	RRP8	NA	0.864888	0.00216311	Ribosomal protein; Hap43-induced; F-12/CO2 early biofilm and rat catheter biofilm induced
orf19.2049	C2_00750W_A		NA	NA	0.785503	0.00216797	Plasma membrane-associated protein; heterozygous null mutant displays sensitivity to virgineone; Spider biofilm induced
orf19.4919	C1_12890W_A		NA	NA	0.560427	0.00218556	Protein of unknown function
orf19.3823	C4_04580W_A	ZDS1	NA	NA	0.45506	0.00220684	Nonessential protein; similar to S. cerevisiae Zds1p
orf19.4987	C1_13550C_A	NUP49	NUP49	NA	0.364687	0.00224366	Nuclear pore protein
orf19.7069	C7_00490C_A		TAE1	NA	0.914393	0.00224685	Putative AdoMet-dependent proline methyltransferase; Hap43-induced; required for normal flow model biofilm growth; Spider biofilm repressed
orf19.7468	CR_00630W_A		VHR1	NA	-0.539859	0.00226127	Putative transcriptional activator; expression upregulated during growth in the mouse cecum; Spider biofilm induced
orf19.1741	CR_04640W_A	DIT1	DIT1	NA	0.759382	0.00226307	Protein of unknown function
orf19.1077	C6_04210C_A	ATM1	ATM1	NA	0.408127	0.00227555	Member of MDR subfamily of ABC family; ortholog of S. cerevisiae ABC transporter, Atm1; induced in low iron; induced by nitric oxide independent of Yhb1
orf19.5700	C5_00010W_A	TLO11	NA	NA	-0.531722	0.00229045	Member of a family of telomere-proximal genes of unknown function; may be spliced in vivo
orf19.6152	CR_07200W_A		NA	NA	0.675717	0.00230117	Protein of unknown function
orf19.6671	C5_03590W_A	LAP4	NA	APE1	-0.489849	0.00230558	Protein similar to aminopeptidase I; mutation confers hypersensitivity to amphotericin B; transcript regulated in macrophage response; flow model biofilm induced
orf19.881	C2_03400C_A	DFG16	NA	NA	0.375327	0.00230742	Rim101 pathway protein that acts in Rim101 processing; regulates filamentation in response to alkaline pH; required for host tissue invasion during infection; flow model biofilm induced
orf19.7567	CR_09930W_A		YDR124W	NA	-0.874749	0.00233436	Protein of unknown function; induced by alpha pheromone in SpiderM medium
orf19.2864.1	CR_03030C_A	RPL28	RPL28	NA	-0.564263	0.00233976	Putative ribosomal protein; Plc1-regulated; downregulated upon phagocytosis by murine macrophage; Spider biofilm repressed
orf19.115	C6_01090C_A		NA	NA	0.719789	0.00234184	Protein of unknown function
orf19.2629	C4_05280W_A	USO1	USO1	NA	0.644784	0.00234456	Protein of unknown function
orf19.6987	C3_05520C_A	DNM1	DNM1	NA	0.448044	0.0023479	Putative dynamin-related GTPase; transcript upregulated inbRHE model of oral candidiasis; transcript regulated by Nrg1, Mig1, and Tup1
orf19.6265.1	C1_06450C_A	RPS14B	RPS14B	NA	-0.495593	0.00238485	Putative ribosomal protein; repressed upon phagocytosis by murine macrophage; transcript positively regulated by Tbf1; Spider biofilm repressed
orf19.2302	C1_11140W_A		CSG2	NA	-0.503295	0.00239024	Protein of unknown function
orf19.720	CR_06460W_A	GST3	NA	NA	0.991722	0.00239779	Glutathione S-transferase; expression regulated upon white-opaque switch; induced by human neutrophils; peroxide-induced; induced by alpha pheromone in SpiderM medium; Spider biofilm induced
orf19.942	C5_00470C_A	KRE62	NA	NA	1.14041	0.00240632	Putative subunit of glucan synthase; macrophage-induced gene; Bcr1-regulated in a/a RPMI biofilms
orf19.5054	C1_07840W_A		BNA6	NA	-0.578429	0.00241187	Putative quinolinate phosphoribosyl transferase, involved in NAD biosynthesis; Hap43p-repressed gene
orf19.2883	C4_06510C_A	CSO99	NA	NA	-0.530768	0.00242264	Protein of unknown function; Hap43-repressed gene; protein not conserved in S. cerevisiae
orf19.6847	C1_04530C_A		TRM44	NA	0.639271	0.00242884	Putative tRNA U44 2'-O-methyltransferase; virulence-group-correlated expression; induced during oral infection; mutants have reduced ability to damage oral epithelial cells; early-stage flow model biofilm induced
orf19.3043	C1_03430W_A		TGL2	NA	-0.649299	0.00243804	Protein of unknown function
orf19.5834	C2_02720W_A		SXM1	NA	-0.382187	0.00243956	Protein of unknown function
orf19.6139	CR_07290W_A	FRE7	NA	NA	1.60392	0.00245052	Copper-regulated cupric reductase; repressed by ciclopirox olamine or 17-beta-estradiol; induced by alkaline conditions or interaction with macrophage; Spider biofilm induced
orf19.3425	C6_01620W_A		NA	NA	0.779885	0.00245725	RING/FYVE/PHD zinc finger protein; Spider biofilm induced
orf19.5213.2	C2_05930W_A	COX9	COX9	NA	-1.0648	0.0024632	Putative subunit VIIa of cytochrome c oxidase; flucytosine induced
orf19.6435	CR_08610W_A		MPC3	NA	-0.351734	0.00247018	Highly conserved subunit of mitochondrial pyruvate carrier; Hap43-repressed; Spider biofilm repressed
orf19.1082.1	C6_04250W_A		COX12	NA	-0.35145	0.00247636	Protein of unknown function
orf19.3111	C4_06980W_A	PRA1	ZPS1	NA	0.860402	0.00249001	Cell surface protein that sequesters zinc from host tissue; enriched at hyphal tips; released extracellularly; binds to host complement regulators; mediates leukocyte adhesion and migration; immunogenic in mouse; produced at ambient pH
orf19.1350	C2_08330W_A		NA	NA	0.406073	0.00250009	Protein with a thioredoxin domain; predicted role in cell redox homeostasis; rat catheter and Spider biofilm induced
orf19.4412	C4_06020C_A		NA	NA	0.507007	0.0025101	Protein of unknown function
orf19.6373	CR_08120C_A	DCP2	DCP2	NA	-0.437637	0.00251387	Protein of unknown function
orf19.947	C5_00420C_A	MRP17	MRP17	NA	0.405771	0.0025144	Predicted mitochondrial ribosomal protein
orf19.270	C3_02790W_A		NA	NA	-0.977894	0.00253004	Protein of unknown function
orf19.3242	CR_01120C_A		TAF10	NA	-0.368313	0.00253004	Putative TFIID and SAGA complex subunit; possibly an essential gene, disruptants not obtained by UAU1 method
orf19.5416	C3_00490W_A	ESA1	ESA1	NA	-0.518745	0.00253004	Subunit of the NuA4 histone acetyltransferase complex; member of MYST family; Spider biofilm induced
orf19.6227	C1_06820W_A		NA	NA	-0.472342	0.00253004	Protein of unknown function
orf19.4872	C1_10050W_A		NA	NA	-0.797649	0.00253266	Protein of unknown function; induced by Mnl1 under weak acid stress; Hap43-induced; mutant is viable
orf19.3195	C5_01800C_A	HIP1	NA	NA	-0.601696	0.00253681	Similar to amino acid permeases; alkaline, flucytosine induced; regulated by Plc1, Gcn2 and Gcn4; fungal-specific; Spider biofilm induced
orf19.791	C2_04290W_A	RIM11	RIM11	NA	-0.678726	0.00254771
orf19.5466	C3_00090W_A	RPS24	RPS24B	NA	-0.458882	0.00255744	Predicted ribosomal protein; hyphal downregulated; repressed upon phagocytosis by murine macrophage; transcriptionally activated by Tbf1; Spider biofilm repressed
orf19.316	C3_03170W_A	SEC13	SEC13	NA	0.360185	0.00257411	Putative protein transport factor; antigenic during murine systemic infection; macrophage-downregulated protein; protein level decreases in stationary phase cultures; Spider biofilm repressed
orf19.1531	C2_02150C_A		RNA14	NA	-0.480604	0.00258176	Protein of unknown function
orf19.2336	C1_10810W_A		NA	NA	1.82386	0.00259981	Pry family pathogenesis-related protein; predicted to be extracellular
orf19.4380.1	CR_03620C_A		YME2	NA	0.682461	0.00259995	Protein of unknown function
orf19.6071	C1_00380C_A		NA	NA	-0.394808	0.00263818	Protein of unknown function
orf19.846	C2_03760C_A		NNK1	NA	-0.804807	0.00264392	Predicted protein kinase similar to S. cerevisiae Nnk1; implicated in proteasome function in S. cerevisiae; induced by Mnl1 under weak acid stress
orf19.450	C1_05150C_A		NA	NA	0.875848	0.00264619	Protein of unknown function
orf19.691	C6_02010C_A	GPD2	NA	GPD1	-0.525159	0.00267168	Surface protein similar to glycerol 3-P dehydrogenase; binds host Factor H, FHL-1, plasminogen; regulated by Ssn6, Nrg1, Efg1; induced by cell wall regeneration, macrophage/pseudohyphal growth, core stress response; Spider biofilm induced
orf19.2898	C4_06370C_A		BOR1	NA	-0.583794	0.00267442	Protein of unknown function
orf19.5683	C5_00140C_A		YHR140W	NA	0.53879	0.00267442	Putative integral membrane protein of unknown function; clade-associated gene expression; Spider biofilm induced
orf19.6415.1	CR_08480C_A		NA	NA	-0.735551	0.00267442	Protein of unknown function
orf19.2055	C2_00710W_A	NPL6	NPL6	NA	-0.313184	0.00267986	Putative nuclear protein localization factor; Hap43-induced; Spider biofilm repressed
orf19.3123.2	C4_06860C_A		CDD1	NA	0.509175	0.00267986	Protein of unknown function
orf19.4078	C2_09160W_A		NA	NA	-0.620585	0.00269871	Protein of unknown function
orf19.4051	C5_05490C_A	HTS1	HTS1	NA	-0.583481	0.00271193	Putative tRNA-His synthetase; downregulated upon phagocytosis by murine macrophage; stationary phase enriched protein; Spider biofilm repressed
orf19.6997	C3_05620W_A	ATO5	NA	ADY2	1.33153	0.00271399	Putative fungal-specific transmembrane protein
orf19.3267	CR_00870C_A		SWF1	NA	-0.437278	0.00271866	Protein of unknown function
orf19.6393	CR_08290W_A		GTS1	NA	-0.547623	0.00272566	Putative Arf3p GTPase activating protein; Hap43p-repressed gene; possibly an essential gene, disruptants not obtained by UAU1 method
orf19.2521	CR_01380W_A		NA	NA	0.397549	0.00274252	Protein of unknown function
orf19.7072	C7_00470C_A	PEL1	PGS1	NA	0.446128	0.00275513	Predicted enzyme of mitochondrial phospholipid biosynthesis; rat catheter and flow model biofilm induced
orf19.2197	C2_07840W_A		NA	NA	0.859137	0.00275778	Protein of unknown function
orf19.1789.1	C4_05320W_A	LYS1	LYS1	NA	-0.45887	0.00276946	Saccharopine dehydrogenase (biosynthetic); enzyme of alpha-aminoadipate lysine biosynthesis pathway; functionally complements S. cerevisiae lys1 mutation; fungal-specific (no human or murine homolog)
orf19.3334	C1_01480C_A	RPS21	RPS2	NA	-0.587651	0.00278961	Protein component of the small (40S) subunit; repressed upon phagocytosis by murine macrophage; positively regulated by Tbf1; Spider biofilm repressed
orf19.3589	C2_08820C_A	SPO11	SPO11	NA	-0.932431	0.00279034	DNA endonuclease; required for genetic recombination between homologous chromosomes during the parasexual cycle; produced in mitotically dividing cells; similar to S. cerevisiae Spo11 which functions in recombination during meiosis
orf19.5977	C3_05070W_A	CEM1	CEM1	NA	0.498798	0.00279445	Protein similar to S. cerevisiae Cem1p, an acyl carrier protein involved in fatty acid biosynthesis; likely to be essential for growth, based on an insertional mutagenesis strategy
orf19.3014	C1_03220C_A	BMH1	BMH2	NA	-0.436612	0.00279499	Sole 14-3-3 protein in C. albicans; role in hyphal growth; possibly regulated by host interaction; localizes to yeast-form cell surface, not hyphae; alternatively spliced 5' UTR intron; Spider biofilm repressed
orf19.5623	C6_03350C_A	ARP4	ARP4	NA	-0.379977	0.00281867	Subunit of the NuA4 histone acetyltransferase complex
orf19.199	C2_09050C_A		NA	NA	0.353712	0.00281892	Protein of unknown function; hyphal-induced expression; upregulated in a cyr1 null mutant
orf19.5835	C2_02710C_A		RRP7	NA	0.48388	0.00282032	Protein of unknown function
orf19.3982	C5_04940W_A		NA	NA	0.670991	0.00283785	Maltase; induced during growth on sucrose; induced by alpha pheromone in SpiderM medium; early-stage flow model biofilm indced
orf19.3788.1	C4_04900W_A	RPL30	NA	NA	-0.57893	0.00284172	Ribosomal 60S subunit protein; pre-rRNA processing; pre-mRNA alternatively spliced to productive/unproductive transcripts; temp-regulated splicing; colony morphology-related regulation by Ssn6, Tup1, Nrg1 regulated; Spider biofilm repressed
orf19.1614	C3_02310W_A	MEP1	MEP3	NA	-0.495401	0.00285784	Ammonium permease; Mep1 more efficient permease than Mep2, Mep2 has additional regulatory role; 11 predicted transmembrane regions; low mRNA abundance; hyphal downregulated; flow model biofilm induced
orf19.6499	C7_02160W_A		NA	NA	0.629574	0.00286963	Predicted DNA-directed RNA polymerase; role in transcription; Spider biofilm induced
orf19.6816	C3_06860C_A		YJR096W	NA	-0.453185	0.00288481	Putative xylose and arabinose reductase; flow model biofilm induced; Spider biofilm repressed
orf19.4414	C4_06040W_A		NA	NA	0.619791	0.00288698	Protein of unknown function
orf19.6544	C7_01780W_A	LPI9	GIP3	NA	-0.63049	0.00291848	Protein phosphatase type 1 regulator; role in chromosome segregation, regulation of phosphoprotein phosphatase activity; rat catheter and Spider biofilm induced
orf19.536	CR_04450C_A		TAF5	NA	-0.496311	0.00293056	Protein of unknown function
orf19.4674.1	C4_01160W_A	CRD2	NA	NA	-1.06324	0.00293387	Metallothionein; for adaptation to growth in high copper; basal transcription is cadmium-repressed; Ssn6 regulated; complements copper sensitivity of an S. cerevisiae cup1 mutant; regulated by Sef1, Sfu1, and Hap43; Spider biofilm induced
orf19.1776	C2_10060C_A		CAB4	NA	-0.887321	0.00293403	Putative pantetheine-phosphate adenylyltransferase (PPAT); which catalyzes 4th step in coenzyme A biosynthesis from pantothenate; rat catheter biofilm repressed
orf19.6975	C3_05370C_A	YST1	RPS0A	NA	-0.384368	0.00293403	Ribosome-associated protein; antigenic in mice; complements S. cerevisiae yst1 yst2 mutant; similar to laminin receptor; predicted S/T phosphorylation, N-glycosylation, myristoylation, Hap43-, Gcn4-regulated; Spider biofilm repressed
orf19.4643	C4_01420W_A		NA	NA	0.475733	0.00294414	Protein of unknown function
orf19.1365	C2_09860C_A		NA	NA	0.735661	0.00295381	Putative monooxygenase; mutation confers hypersensitivity to toxic ergosterol analog; constitutive expression independent of MTL or white-opaque status
orf19.5197	C1_04400C_A	APE2	APE2	NA	-0.415033	0.00296536	Neutral arginine, alanine, leucine specific metallo-aminopeptidase; purified from cell wall/intracellular fractions; protein repressed during mating; Hog1, farnesol-induced; may be essential (UAU1 method); rat catheter biofilm repressed
orf19.6146	CR_07240C_A	CLG1	CLG1	NA	0.388034	0.00297491	Putative cyclin-like protein; transcription is regulated upon yeast-hyphal switch
orf19.5806	C2_02970C_A	ALD5	ALD5	NA	-0.967813	0.00298075	NAD-aldehyde dehydrogenase; decreased expression in fluconazole-resistant isolate, or in hyphae; biofilm induced; fluconazole-downregulated; protein abundance is affected by URA3 expression in the CAI-4 strain; stationary phase enriched
orf19.3254	CR_01020C_A		NA	NA	0.424035	0.00299667	Protein of unknown function
orf19.6455	C7_02550C_A		CIA2	NA	-0.760653	0.00300025	Protein of unknown function, transcript is upregulated in clinical isolates from HIV+ patients with oral candidiasis
orf19.4975	C1_13450W_A	HYR1	NA	NA	0.827195	0.00301853	GPI-anchored hyphal cell wall protein; macrophage-induced; repressed by neutrophils; resistance to killing by neutrophils, azoles; regulated by Rfg1, Efg1, Nrg1, Tup1, Cyr1, Bcr1, Hap43; Spider and flow model biofilm induced
orf19.6238	C1_06720C_A		NA	NA	0.493849	0.00303298	Protein of unknown function
orf19.2907	C4_06300C_A	PGA42	NA	NA	0.775973	0.00304278	Putative GPI-anchored adhesin-like protein; decreased transcription is observed in azole-resistant strains that overexpress CDR1 and CDR2 or MDR1
orf19.5337	C2_10580W_A	UBC15	NA	NA	-0.365224	0.00304373	Putative E2 ubiquitin-conjugating enzyme
orf19.3680	C1_02230W_A	2020-09-07	SHS1	NA	0.305981	0.00306829	Septin, required for wild-type invasive growth in vitro but not required for virulence in a mouse model of systemic infection; localizes to hyphal septum or bud neck; Asn-rich; aberrant gel mobility; phosphorylated in vitro by Gin4p
orf19.6634	CR_05780W_A	VMA2	VMA2	NA	-0.407728	0.00308033	Vacuolar H(+)-ATPase; protein present in exponential and stationary growth phase yeast cultures; plasma membrane localized; amphotericin B repressed, caspofungin repressed
orf19.2723	C4_02750W_A	HIT1	HIT1	NA	0.754065	0.00309013	Ortholog of S. cerevisiae Hit1; protein of unknown function required for high temperature growth; flow model biofilm induced; Spider biofilm induced
orf19.3026	C1_03300C_A	MAS1	MAS1	NA	0.381243	0.00309445	Putative mitochondrial processing protease; Hap43-repressed; transcript regulated by Nrg1; oxidative stress-induced via Cap1
orf19.4068	C2_09100C_A		NA	NA	-0.462003	0.00309555	Protein of unknown function; flow model biofilm induced
orf19.3295	C1_01070C_A		NA	NA	-0.464093	0.00310687	Protein of unknown function
tP(AGG)1	C1_06950C_A	tP(AGG)1	NA	NA	1.29617	0.00310687	tRNA-Pro, predicted by tRNAscan-SE; AGG anticodon
orf19.458.1	CR_05960W_A		NA	NA	-0.891327	0.00310808	Protein of unknown function
orf19.25	C2_06480W_A		TRM10	NA	-0.437666	0.00311506	Protein of unknown function
[truncated: 4,470 more rows]

## Sheet: NDvsCASP_Q3
Comparison: No treatment vs. Caspofungin in tra1Q3 strain
ORF	ASSEMBLY22_ID	Ca_GeneName	Sc_Ortholog	Sc_BestHit	Log2(Fold-Change)	Adjusted.Pvalue	Description
orf19.4255	C5_02460C_A	ECM331	NA	NA	4.09969	5.44816e-118	GPI-anchored protein; mainly at plasma membrane, also at cell wall; Hap43, caspofungin-induced; Plc1-regulated; Hog1, Rim101-repressed; colony morphology-related regulated by Ssn6; induced by ketoconazole and hypoxia
orf19.3829	C4_04530C_A	PHR1	NA	GAS1	3.64429	3.41208e-75	Cell surface glycosidase; may act on cell-wall beta-1,3-glucan prior to beta-1,6-glucan linkage; role in systemic, not vaginal virulence (neutral, not low pH); high pH or filamentation induced; Bcr1-repressed in RPMI a/a biofilm
orf19.1765	C2_10160W_A		NA	NA	2.31552	2.50779e-64	Secreted protein; fluconazole-induced
orf19.24	C2_06470W_A	RTA2	RSB1	NA	2.64389	7.39155e-64	Flippase; sphingolipid long chain base release; mediates calcineurin-dependent resistance to azoles; stress-associate; Plc1, Ca2+, calcineurin-regulated; ketoconazole, caspofungin induced; Spider biofilm induced; flow biofilm repressed
orf19.6688	C7_03560W_A		NA	NA	-4.02668	9.62058e-60	Protein of unknown function; expression decreases by benomyl treatment or in an azole-resistant strain overexpressing MDR1; Spider biofilm induced
orf19.5602	C6_03160C_A	BMT6	NA	NA	1.89618	1.98379e-55	Beta-mannosyltransferase; beta-1,2-mannosylation of phospholipomannan; member of a 9-member family including Bmt1, Bmt2, Bmt3, and Bmt4 with roles in mannosylation of cell wall phosphopeptidomannan; flow model biofilm induced
orf19.2832	CR_02740W_A	INN1	INN1	NA	2.23094	3.88434e-55	Protein with similarity to S. cerevisiae Inn1p, which is an essential protein of the contractile actomyosin ring required for ingression of the plasma membrane into the bud neck during cytokinesis; contains a C2 membrane targeting domain
orf19.4691	C4_00980C_A	MRV1	NA	NA	4.41377	9.56901e-48	Protein of unknown function
orf19.5267	C1_11990W_A		NA	NA	-2.37496	4.04437e-46	Putative cell wall adhesin-like protein; repressed in core caspofungin response and by alpha pheromone in SpiderM medium; transcript reduced in ace2 mutant; flow model, rat catheter and Spider biofilm repressed
orf19.3501	C6_02090C_A		PXL1	NA	2.02588	5.22118e-46	S. cerevisiae ortholog Pxl1 localizes to sites of polarized growth and is required for selection and/or maintenance of polarized growth sites; Hog1p-repressed
orf19.7586	CR_10110W_A	CHT3	CTS1	NA	-3.34958	5.34836e-45	Major chitinase; secreted; functional homolog of S. cerevisiae Cts1p; 4 N-glycosylation motifs; possible O-mannosylation; putative signal peptide; hyphal-repressed; farnesol upregulated in biofilm; regulated by Efg1p, Cyr1p, Ras1p
orf19.2758	C4_02440C_A	PGA38	NA	NA	-2.56753	3.70726e-42	Putative adhesin-like GPI-anchored protein; repressed during cell wall regeneration; possibly an essential gene, disruptants not obtained by UAU1 method; rat catheter and Spider biofilm repressed
orf19.2445	C1_06000W_A		NA	DIP5	2.84309	4.67537e-41	Putative dicarboxylic amino acid permease; fungal-specific (no human or murine homolog); induced by alpha pheromone in SpiderM medium
orf19.675.1	C1_11260C_A		NA	NA	2.61488	1.14042e-40	Putative adhesin-like protein
orf19.5843	CR_05610C_A	SRR1	NA	NA	1.77472	1.41659e-40	Two-component system response regulator; involved in stress response; Plc1-regulated; upregulated in cyr1 null mutant; flow model biofilm induced; Spider biofilm induced
orf19.727	CR_06380C_A		NA	NA	1.85207	8.85452e-38	Predicted ORF overlapping the Major Repeat Sequence on chromosome R; member of a family encoded by FGR6-related genes in the RB2 repeat sequence
orf19.7495	CR_00380W_A		NA	NA	2.11713	2.9332e-36	Protein with NADPH oxidoreductase containing flavin mononucleotide (FMN) domain; induced by nitric oxide
orf19.1943	C5_01260W_A		NA	NA	2.58511	1.19554e-35	Protein of unknown function
orf19.7017	C7_00970C_A	YOX1	YOX1	NA	2.37636	2.36651e-35	Putative homeodomain-containing transcription factor; transcriptional repressor; periodic mRNA expression, peak at cell-cycle G1/S phase
orf19.3282	CR_00740C_A	BMT3	NA	NA	1.92045	6.96566e-35	Beta-mannosyltransferase; adds 2nd beta-mannose to the acid-stable fraction of cell wall phosphopeptidomannan, elongation of beta-mannose chains on the phosphopeptidomannan acid-labile fraction; Hap43-induced; Spider biofilm induced
orf19.4763	C1_09060C_A		FUN14	NA	-1.53705	1.24218e-34	Protein of unknown function; possibly membrane bound; mutants are viable; rat catheter biofilm repressed
orf19.3298	C1_01100W_A	CCH1	CCH1	NA	1.72364	2.57303e-34	Voltage-gated Ca2+ channel of the high affinity calcium uptake system; roles in thigmotropism, establishment of galvanotropism; transcript regulated by Nrg1 and Mig1; flow model biofilm repressed
orf19.4308	C5_02840C_A	HSL1	HSL1	NA	1.46585	2.71631e-34	Probable protein kinase involved in determination of morphology during the cell cycle of both yeast-form and hyphal cells via regulation of Swe1p and Cdc28p; required for full virulence and kidney colonization in mouse systemic infection
orf19.2849	CR_02920C_A	AQY1	NA	NA	-2.04486	1.26301e-33	Aquaporin water channel; osmotic shock resistance, WT freeze tolerance; virulent in mice; flucytosine repressed; flow model/RPMI/Spider/rat catheter biofilm induced; required for RPMI biofilm formation; Bcr1-induced in a/a RPMI biofilms
orf19.1473	C2_01630W_A		NA	NA	2.40925	1.73246e-33	2-hydroxyacid dehydrogenase domain-containing protein; Hap43-repressed gene; induced by alpha pheromone in SpiderM medium
orf19.6202	C1_07030C_A	RBT4	NA	PRY3	2.08651	2.51969e-33	Pry family protein; required for virulence in mouse systemic/rabbit corneal infections; not filamentation; mRNA binds She3, is localized to hyphal tips; Hap43-induced; in both yeast and hyphal culture supernatants; Spider biofilm induced
orf19.3490	C2_10420W_A	FGR6-4	NA	NA	1.7898	4.3423e-33	Protein lacking an ortholog in S. cerevisiae; member of a family encoded by FGR6-related genes in the RB2 repeat sequence; transposon mutation affects filamentous growth
orf19.6896	C7_01100C_A		NA	NA	2.56388	4.58908e-33	Predicted ORF overlapping the Major Repeat Sequence on chromosome 7; member of a family encoded by FGR6-related genes in the RB2 repeat sequence
orf19.263.1	C3_02710W_A		NA	NA	1.71232	1.20255e-31	Protein of unknown function; gene has intron; Spider biofilm induced
orf19.3216	C5_03950W_A		NA	NA	1.65392	1.72567e-31	Similar to Rab GTPase activators; Hap43p-induced gene
orf19.4910	C1_10400C_A	FGR41	NA	NA	-3.41319	2.63939e-31	Putative GPI-anchored adhesin-like protein; transposon mutation affects filamentous growth; Spider biofilm repressed
orf19.4705	C4_00880W_A		CCA1	NA	1.52606	3.38959e-31	Protein of unknown function
orf19.2512	C3_01100W_A		NA	NA	-1.40007	5.55836e-31	Protein of unknown function
orf19.6919	C7_01380W_A		NA	NA	3.79272	9.71827e-31	Protein of unknown function
orf19.6595	CR_09680C_A	RTA4	NA	NA	3.59595	1.16919e-30	Protein similar to S. cerevisiae Rsb1p, involved in fatty acid transport; transposon mutation affects filamentous growth; alkaline downregulated; caspofungin induced; possibly an essential gene; Hap43p-repressed
orf19.5814.1	C2_02910W_A		NA	NA	3.32605	3.79232e-30	Protein of unknown function
orf19.2060	C2_00680C_A	SOD5	NA	NA	4.81332	1.03792e-29	Cu and Zn-containing superoxide dismutase; protects against oxidative stress; induced by neutrophils, hyphal growth, caspofungin, osmotic/oxidative stress; oralpharyngeal candidiasis induced; rat catheter and Spider biofilm induced
orf19.3902	C5_04190W_A	MRV2	YDL218W	NA	2.69688	8.33675e-29	Protein of unknown function; repressed by fluphenazine treatment or in an azole-resistant strain that overexpresses CDR1 and CDR2; Spider biofilm induced
orf19.5604	C6_03170C_A	MDR1	FLR1	NA	2.19258	1.18604e-28	Plasma membrane MDR/MFS multidrug efflux pump; methotrexate is preferred substrate; overexpression in drug-resistant clinical isolates confers fluconazole resistance; repressed in young biofilms; rat catheter biofilm induced
orf19.4279	C5_02630C_A	MNN1	NA	NA	1.92569	1.45544e-28	Putative alpha-1,3-mannosyltransferase; of the mannosyltransferase complex; negatively regulated by Rim101; transcript elevated in chk1 and nik1 mutants, but not in sln1 mutant; Spider and flow model biofilm induced
orf19.5874	C3_04310C_A		NA	NA	3.66722	1.45544e-28	Protein of unknown function
orf19.7219	C1_14130W_A	FTR1	FTR1	NA	-3.78326	3.13498e-28	High-affinity iron permease; required for mouse virulence, low-iron growth; iron, amphotericin B, caspofungin, ciclopirox, Hog1p, Sef1p, Sfu1p, and Hap43p regulated; complements S. cerevisiae ftr1 iron transport; Hap43p-repressed
orf19.3893	C5_04110W_A	SCW11	SCW11	NA	-2.58159	3.68924e-28	Cell wall protein; repressed in ace2 mutant; repressed in core caspofungin response; induced in high iron; possibly an essential gene, disruptants not obtained by UAU1 method; rat catheter and Spider biofilm repressed
orf19.1430	C4_04190C_A		NA	NA	2.60765	6.21117e-27	Protein of unknown function
orf19.3207	C5_01680C_A	CCN1	NA	NA	1.69744	9.67178e-27	G1 cyclin; required for hyphal growth maintenance (not initiation); cell-cycle regulated transcription (G1/S); Cdc28p-Ccn1p initiates Cdc11p S394 phosphorylation on hyphal induction; expression in S. cerevisiae inhibits pheromone response
orf19.1736	CR_04680C_A		NA	NA	1.71493	3.20812e-26	Protein of unknown function; transcript detected on high-resolution tiling arrays
orf19.4294	C5_02740W_A		CYC2	NA	1.65282	4.87547e-26	Protein of unknown function
RPR1	C2_08055W_A	RPR1	NA	NA	1.38973	5.73113e-26	Putative ortholog of S. cerevisiae RNAse P RNA; gene transcribed by RNA Pol III
orf19.6028	C1_00780C_A	HGC1	CLN2	NA	2.17054	4.10129e-25	Hypha-specific G1 cyclin-related protein involved in regulation of morphogenesis, biofilm formation; Cdc28-Hgc1 maintains Cdc11 S394 phosphorylation during hyphal growth; required for virulence in mice; regulated by Nrg1, Tup1, farnesol
orf19.2649	C5_03310C_A	PCL1	NA	NA	2.17241	4.81702e-25	Cyclin homolog; transcript induced by filamentous growth; induced by alpha pheromone in SpiderM medium
orf19.4937	C1_13110C_A	CHS3	CHS3	NA	0.977851	5.22707e-25	Major chitin synthase of yeast and hyphae; synthesizes short-chitin fibrils; Chs4-activated; transcript induced at yeast-hyphal transition; Chs1 and Chs2, but not Chs3, are inhibited by the protoberberine HWY-289; Spider biofilm induced
orf19.2125	C6_04420W_A		NA	NA	2.45708	7.56937e-25	Protein of unknown function; GlcNAc-induced protein; Spider biofilm induced; rat catheter biofilm repressed
orf19.1234	C4_05530W_A	FGR6-10	NA	NA	1.57935	7.89019e-25	Protein lacking an ortholog in S. cerevisiae; member of a family encoded by FGR6-related genes in the RB2 repeat sequence; transposon mutation affects filamentous growth
orf19.1618	C3_02280C_A	GFA1	NA	NA	0.695066	1.64763e-24	Glucosamine-6-phosphate synthase, homotetrameric enzyme of chitin/hexosamine biosynthesis; inhibited by UDP-GlcNAc, FMDP, N-acyl peptide, kanosamine-6-P; functional homolog of S. cerevisiae Gfa1p; Cagrowth-phase regulated; catalytic Cys
orf19.6420	CR_08510W_A	PGA13	NA	NA	2.80079	5.58575e-24	GPI-anchored cell wall protein involved in cell wall synthesis; required for normal cell surface properties; induced in oralpharyngeal candidasis; Spider biofilm induced; Bcr1-repressed in RPMI a/a biofilms
orf19.3629	C2_08490W_A	DSE1	DSE1	NA	-1.99019	6.25647e-24	Essential cell wall protein involved in cell wall integrity and rigidity; periodic mRNA expression peaks at M/G1 phase; Ace2p-induced; required for virulence in a mouse model of infection
orf19.4651	C4_01360W_A	PGA53	NA	NA	-1.34116	9.46451e-24	GPI-anchored cell surface protein of unknown function; greater mRNA abundance observed in a cyr1 homozygous null mutant than in wild type
orf19.403	C1_08570C_A	PCL2	PCL2	NA	2.88003	9.51511e-24	Cyclin homolog; reduced expression observed upon depletion of Cln3; farnesol regulated; periodic mRNA expression, peak at cell-cycle G1/S phase; Hap43-induced; rat catheter biofilm repressed
orf19.5924	C3_04640W_A	ZCF31	NA	NA	1.7142	1.04179e-23	Zn(II)2Cys6 transcription factor of unknown function; mutant is sensitive to copper and SDS, and resistant to Calcofluor White; required for yeast cell adherence to silicone substrate
orf19.4526	C1_01990W_A	HSP30	HSP30	NA	-4.26013	2.53154e-23	Putative heat shock protein; fluconazole repressed; amphotericin B induced; Spider biofilm induced; rat catheter biofilm induced
orf19.7104	C7_00190W_A		NA	NA	-2.25473	2.67559e-23	Adhesin-like cell wall protein; similar to mucins and to a Litomosoides microfilarial sheath protein; N-terminal secretion signal; rat catheter and Spider biofilm repressed
orf19.1945	C5_01240W_A	AUR1	AUR1	NA	1.52954	4.28755e-23	Inositolphosphorylceramide (IPC) synthase; catalyzes the key step in sphingolipid biosynthesis; antifungal drug target; flow model biofilm induced; Spider biofilm induced
orf19.3919	C5_04320C_A		NA	NA	0.866601	5.96604e-23	RNI-like superfamily domain-containing protein; early-stage flow model biofilm induced; Spider biofilm induced
orf19.4765	C1_09080C_A	PGA6	NA	NA	2.7278	6.89505e-23	GPI-anchored cell wall adhesin-like protein; induced by high iron; upregulated upon Als2 depletion; mRNA binds She3 and is localized to hyphal tips; Spider biofilm repressed
orf19.6315	CR_04770C_A		NA	NA	1.54358	8.41741e-23	Protein of unknown function
orf19.4864	C1_09980C_A		YJU3	NA	0.943947	1.42918e-22	Protein of unknown function
orf19.3793	C4_04860W_A		NA	NA	-1.14431	1.71331e-22	Protein of unknown function; mRNA binds She3; regulated by Nrg1; upregulated in a cyr1 or ras1 mutant
orf19.5861.1	C3_04190W_A		NA	NA	1.38548	2.00604e-22	Protein of unknown function; Spider biofilm induced
orf19.3751	CR_02210W_A		FRK1	NA	1.30583	3.0621e-22	Putative serine/threonine protein kinase; possibly an essential gene, disruptants not obtained by UAU1 method
orf19.7084	C7_00360W_A	DFI1	NA	NA	0.951568	3.38614e-22	Cell-surface associated glycoprotein; promotes activation of Cek1 in a matrix-dependent manner; N-glycosylated; Spider biofilm induced
orf19.7585	CR_10100C_A	INO1	INO1	NA	2.5887	3.41842e-22	Inositol-1-phosphate synthase; antigenic in human; repressed by farnesol in biofilm or by caspofungin; upstream inositol/choline regulatory element; glycosylation predicted; rat catheter, flow model induced; Spider biofilm repressed
orf19.5877	C3_04340W_A	ATF1	NA	NA	1.29013	7.71315e-22	Putative alcohol acetyltransferase; caspofungin repressed; expression depends on Tac1p
orf19.6594	CR_09690C_A	PLB3	PLB1	NA	0.998988	1.07709e-21	GPI-anchored cell surface phospholipase B; possibly secreted; fungal-specific (no mammalian homolog); induced by Tbf1; fluconazole-induced; possible essential gene (UAU1 method); Spider and flow model biofilm induced
orf19.5716	C6_03500C_A	SAP4	NA	NA	2.42867	1.31824e-21	Secreted aspartyl proteinase; sap4,5,6 mutant defective in protein utilization for nitrogen; virulence role complicated by URA3 effects; expressed during mucosal and systemic infections; N-glycosylated; rat catheter, Spider biofilm induced
orf19.6877	C2_05660W_A	PNG2	NA	NA	1.40076	2.21781e-21	Putative peptide:N-glycanase; gene has variable numbers of 12-bp repeats; induced by caspofungin, ciclopirox olamine, ketoconazole or hypoxia; gene of core caspofungin response; Hap43-induced; Spider biofilm induced
orf19.5037	C4_03820C_A	HRQ2	NA	NA	2.88165	4.53064e-21	Protein of unknown function; mutants are viable; rat catheter and Spider biofilm induced
orf19.5775	C6_03990C_A		NA	NA	1.6721	4.58552e-21	Predicted ORF overlapping the Major Repeat Sequence on chromosome 6; member of a family encoded by FGR6-related genes in the RB2 repeat sequence; rat catheter biofilm repressed
orf19.5191	C7_02750W_A	FGR6-1	NA	NA	1.63639	5.82846e-21	Protein lacking an ortholog in S. cerevisiae; member of a family encoded by FGR6-related genes in the RB2 repeat sequence; transposon mutation affects filamentous growth
orf19.5019	C1_13810W_A		NA	NA	-1.84728	1.00138e-20	Protein of unknown function
orf19.4377	CR_03790C_A	KRE1	KRE1	NA	1.16186	4.41254e-20	Cell wall glycoprotein; beta glucan synthesis; increases glucan content in S. cerevisiae kre1, complements killer toxin sensitivity; caspofungin induced; Spider/rat catheter/flow model biofilm induced; Bcr1-repressed in RPMI a/a biofilms
orf19.7359	C3_05780C_A	CRZ1	CRZ1	NA	1.43414	5.12248e-20	Calcineurin-regulated C2H2 transcription factor; role in maintenance of membrane integrity, azole tolerance; not required for mouse virulence; repressed by low iron; regulates Ca++ influx during alkaline pH response; Spider biofilm induced
orf19.2926	C1_02390W_A		NA	NA	1.17201	7.18229e-20	Putative nuclease required for DNA single- and double-strand break repair; rat catheter biofilm induced
orf19.2886	C4_06480C_A	CEK1	FUS3	NA	1.08032	9.79964e-20	ERK-family protein kinase; required for wild-type yeast-hypha switch, mating efficiency, virulence in mice; Cst20-Hst7-Cek1-Cph1 MAPK pathway regulates mating, and invasive hyphal growth under some conditions; Spider biofilm induced
orf19.2209	C2_07730W_A	YVC1	YVC1	NA	1.02841	1.2994e-19	Putative vacuolar cation channel shock; repressed by alpha pheromone in SpiderM medium; flow model biofilm repressed
orf19.670.2	C1_11320C_A		NA	NA	-1.58576	1.74799e-19	Protein of unknown function; hypoxia, Hap43-repressed; ketoconazole induced; induced in oralpharyngeal candidasis; 16h flow model biofilm repressed, late-stage flow model biofilm induced; rat catheter and Spider biofilm induced
orf19.5614	C6_03260W_A		RNH1	NA	1.75475	2.68508e-19	Putative ribonuclease H1; possibly an essential gene, disruptants not obtained by UAU1 method; flow model biofilm induced; Spider biofilm induced
orf19.4712	C1_07770W_A	FGR6-3	NA	NA	1.58264	3.47913e-19	Protein lacking an ortholog in S. cerevisiae; member of a family encoded by FGR6-related genes in the RB2 repeat sequence; transposon mutation affects filamentous growth
orf19.2459	C1_05900W_A		NA	NA	1.37993	4.75999e-19	Protein of unknown function; mRNA binds to She3; Hap43 repressed gene; Spider biofilm induced
orf19.655	C1_11480W_A	PHO84	PHO84	NA	2.59657	1.95075e-18	High-affinity phosphate transporter; transcript regulated by white-opaque switch; Hog1, ciclopirox olamine or alkaline induced; caspofungin, stress repressed; upregulated in RHE model; Spider and flow model biofilm induced, Hap43-induced
orf19.9	CR_07120C_A		NA	NA	-1.52522	4.18521e-18	Protein of unknown function
orf19.6928	C3_03870C_A	SAP9	YPS1	NA	1.67183	6.79981e-18	Secreted aspartyl protease; roles in adhesion, cell surface integrity; induced by antifungal drugs, stationary phase, or in white-phase cells; farnesol-downregulated in biofilm; autocatalytic processing; GPI-anchor; Spider biofilm induced
orf19.445	C1_05210C_A		YNR040W	NA	1.03451	7.78053e-18	Protein of unknown function; repressed by prostaglandins
orf19.5544	C6_02730W_A	SAC6	SAC6	NA	0.948813	9.34206e-18	Fimbrin; actin filament bundling protein; transcript regulated by Nrg1 and Mig1; protein level decreases in stationary phase
orf19.3048	C1_03460C_A		NA	NA	1.62061	1.46574e-17	Protein of unknown function; repressed by alpha pheromone in SpiderM medium
orf19.5384	C3_00710W_A	CHS8	NA	NA	0.970826	1.51263e-17	Chitin synthase required for synthesis of long-chitin fibrils; nonessential; 8 or 9 membrane spanning regions; mRNA present in yeast and hyphae; induced during cell wall regeneration; flow model biofilm repressed
orf19.1671	C3_01730C_A	UTR2	UTR2	NA	1.01603	1.59035e-17	Putative GPI anchored cell wall glycosidase; role in adhesion, hyphal growth on Spider (not serum) medium; chitin-binding, glycosyl hydrolase domains; induced during cell wall regeneration; mRNA in yeast-form cells; Spider biofilm induced
orf19.1507	C2_01950C_A	AMN1	AMN1	NA	-1.24583	2.45998e-17	Putative negative regulator of exit from mitosis; Plc1-regulated; rat catheter biofilm induced
orf19.3615	C2_08620W_A		YPL191C	NA	0.595218	2.46398e-17	Protein of unknown function; induced in core caspofungin response; expression upregulated in an ssr1 null mutant; induced by nitric oxide independent of Yhb1p
orf19.2179	C2_08050C_A	SIT1	ARN1	NA	-1.64607	3.4107e-17	Transporter of ferrichrome siderophores, not ferrioxamine B; required for human epithelial cell invasion in vitro, not for mouse systemic infection; regulated by iron, Sfu1, Rfg1, Tup1, Hap43; rat catheter and Spider biofilm induced
orf19.4082	C2_09220W_A	DDR48	DDR48	NA	2.96475	4.58644e-17	Immunogenic stress-associated protein; filamentation regulated; induced by benomyl/caspofungin/ketoconazole or in azole-resistant strain; Hog1, farnesol, alkaline repressed; stationary phase enriched; Spider, flow model biofilm induced
orf19.753	C1_04900W_A	MNN15	MNT4	NA	1.5993	4.81521e-17	Putative alpha-1,3-mannosyltransferase; predicted role in protein O-linked glycosylation; Spider biofilm induced
orf19.6536	C7_01840W_A	IQG1	IQG1	NA	-0.982565	6.60104e-17	Actomyosin ring component at bud neck; cell-cycle regulated ser phosphorylation at CDK sites regulate association with Bni1/Bnr1, Iqg1 degradation, and ring disassembly; mutation causes cytokinetic defects; rat catheter biofilm repressed
orf19.4706	C4_00860C_A		PIN2	NA	2.46566	8.35007e-17	Protein of unknown function; induced in cyr1 or ras1 mutant; induced by fluconazole, by alpha pheromone in SpiderM medium and during oralpharyngeal candidasis; Spider biofilm induced
orf19.4477	C1_04020C_A	CSH1	NA	YPL088W	1.92243	1.34538e-16	Aldo-keto reductase; role in fibronectin adhesion, cell surface hydrophobicity; regulated by temperature, growth phase, benomyl, macrophage interaction; azole resistance associated; Spider biofilm induced; rat catheter biofilm repressed
orf19.1208	C4_03990C_A		NA	NA	1.57285	2.6695e-16	Predicted ORF in the Major Repeat Sequence on chromosome 4; member of a family encoded by FGR6-related genes in the RB2 repeat sequence
orf19.5674	C4_00450C_A	PGA10	NA	NA	-2.45435	3.12321e-16	GPI anchored membrane protein; utilization of hemin and hemoglobin for Fe in host; Rim101 at ph8/hypoxia/ketoconazole/ciclopirox/hypha-induced; required for RPMI biofilm formation, Bcr1-induced in a/a biofilm; rat catheter biofilm repressed
orf19.3865	CR_06110C_A	RFX1	RFX1	NA	1.42277	3.97842e-16	Transcription factor; involved in DNA damage responses, morphogenesis, and virulence; Spider biofilm induced
orf19.787	C4_03950C_A		NA	NA	1.90756	5.22544e-16	Protein of unknown function
orf19.3932.1	C5_04480C_A		NA	NA	1.8444	5.90007e-16	Protein of unknown function
orf19.7444	C3_06550C_A		TFB6	NA	-0.739373	9.98475e-16	Protein of unknown function
orf19.5704	C6_03440W_A		CCM1	NA	1.42934	1.52332e-15	Protein of unknown function
orf19.467	CR_03890W_A	WOR3	NA	NA	2.46795	1.58984e-15	Transcription factor; modulator of white-opaque switch; induced in opaque cells; promoter bound by Wor1; overexpression at 25 degr shifts cells to opaque state; deletion stabilizes opaque cells at higher temperatures; Spider biofilm induced
orf19.6249	C1_06610C_A	HAK1	NA	NA	2.15537	1.6649e-15	Putative potassium transporter; similar to Schwanniomyces occidentalis Hak1p; amphotericin B induced; induced upon phagocytosis by macrophage; Hap43-repressed; rat catheter biofilm repressed
orf19.4764	C1_09070W_A		PAN2	NA	-0.800368	1.66834e-15	Protein of unknown function
orf19.2984	C1_02930C_A	MST1	MST1	NA	1.68823	2.32275e-15	Protein of unknown function
orf19.3592	C2_08790W_A	JEM1	JEM1	NA	1.02552	2.4802e-15	Functional homolog of S. cerevisiae Jem1p, which acts with Scj1p and Kar2p (BiP) in protein folding and ER-associated degradation of misfolded proteins, and also has a role in karyogamy; has J domain and 4 tetratricopeptide repeats
orf19.1893	C2_07390C_A		NA	NA	-1.92879	2.72053e-15	Protein of unknown function; Spider biofilm repressed
snR35a	CR_00450C_A		NA	NA	1.90575	3.30574e-15	H/ACA box small nucleolar RNA (snoRNA)
orf19.3664	C1_02070W_A	HSP31	NA	NA	-2.22333	4.63891e-15	Putative 30 kda heat shock protein; repressed during the mating process; rat catheter biofilm induced
TER1	CR_05370W_A		NA	NA	1.66646	4.99337e-15	Telomerase RNA; provides the template for the telomerase reverse transcriptase TERT/EST2
orf19.4883	C1_10140C_A		COS111	NA	1.74442	6.16292e-15	Protein of unknown function; S. cerevisiae ortholog Cos111 confers resistance to the antifungal drug ciclopirox olamine; constitutive expression independent of MTL or white-opaque status; Spider biofilm induced
orf19.7391	C3_06090C_A	OCH1	OCH1	NA	0.853142	9.93894e-15	Alpha-1,6-mannosyltransferase; initiates N-glycan outer chain branch addition; similar to S. cerevisiae Och1p; required for wild-type virulence in mouse intravenous infection; fungal-specific (no human or murine homolog)
orf19.2639	C5_03410C_A		MRPL20	NA	1.40878	1.12928e-14	Protein of unknown function
orf19.2382	CR_03400W_A		ISM1	NA	1.46471	1.13132e-14	Protein similar to isoleucyl-tRNA synthetase; isoleucyl-tRNA synthetase is the target of drugs including the cyclic beta-amino acid icofungipen/PLD-118/BAY-10-8888 and mupirocin
orf19.6608	CR_09530C_A		NA	NA	1.04675	1.19507e-14	Predicted DDE superfamily endonuclease domain; repression correlates with clinical development of fluconazole resistance; Spider biofilm induced
orf19.663	C1_11400C_A	GIN4	GIN4	NA	1.40726	1.60239e-14	Autophosphorylated kinase; role in pseudohyphal-hyphal switch and cytokinesis; phosphorylates Cdc11p on S395; necessary for septin ring within germ tube but not for septin band at mother cell junction; physically associates with septins
orf19.4565	C4_02250C_A	BGL2	BGL2	NA	0.862841	2.40226e-14	Cell wall 1,3-beta-glucosyltransferase; mutant has cell-wall and growth defects, but wild-type 1,3- or 1,6-beta-glucan content; antigenic; virulence role in mouse systemic infection; rat catheter biofilm induced
orf19.1144	C1_11730W_A		NA	NA	1.27219	3.50493e-14	Protein with SEL-1 like protein domain; early-stage flow model biofilm induced
orf19.4932	C1_13060C_A		MEF1	NA	2.12268	3.50493e-14	Protein of unknown function
orf19.7362	C3_05810C_A	SKN1	NA	NA	1.73576	3.68586e-14	Protein with a role in beta-1,6-glucan synthesis; probable N-glycosylated type II membrane protein; transcript and mRNA length change induced by yeast-hypha transition; induced by Rim101, caspofungin; rat catheter and Spider biofilm induced
tR(CCU)1	C3_01240C_A	tR(CCU)1	NA	NA	2.65469	3.68586e-14	tRNA-Arg, predicted by tRNAscan-SE; CCU anticodon
orf19.6119	CR_07460C_A		NA	NA	-0.930789	5.99471e-14	Protein of unknown function; Spider biofilm repressed
orf19.1070	C1_04340C_A		YMR010W	NA	1.07335	8.78032e-14	Protein of unknown function
orf19.5785	C2_03110W_A		NA	NA	-2.17959	1.17545e-13	Protein of unknown function; upregulated in a cyr1 or ras1 null mutant; induced by nitric oxide
orf19.2020	C2_01020W_A	HGT6	HXT6	NA	-1.6231	1.2988e-13	Putative high-affinity MFS glucose transporter; 20 family members; induced in core stress response; fluconazole, oralpharyngeal candidasis induced; flow model biofilm induced; Spider biofilm induced
orf19.6899	C7_01170C_A		NA	NA	-1.60234	1.2988e-13	Putative oxidoreductase; mutation confers hypersensitivity to toxic ergosterol analog; rat catheter and Spider biofilm induced
orf19.976	C5_00210C_A	BRE1	BRE1	NA	-1.00178	1.37099e-13	Putative transcription factor with C3HC4 zinc finger DNA-binding motif; similar to S. cerevisiae Bre1p; transposon mutation affects filamentous growth
orf19.4739	C1_08810C_A	MSS116	MSS116	NA	1.01219	1.37099e-13	Putative DEAD-box protein; required for efficient splicing of mitochondrial Group I and II introns; Hap43-induced; rat catheter biofilm induced
orf19.2137	C6_04510C_A		NA	NA	1.97641	1.37099e-13	Protein of unknown function
orf19.2451	C1_05960W_A	PGA45	NA	NA	-2.69038	1.7423e-13	Putative GPI-anchored cell wall protein; repressed in core caspofungin response; Hog1-induced; regulated by Ssn6; Mob2-dependent hyphal regulation; flow model biofilm induced
orf19.6408	CR_08420W_A		NA	NA	-1.18912	1.82452e-13	Putative DnaJ-like heat shock/chaperone; Hap43-repressed; Spider and F-12/CO2 biofilm induced
orf19.1033	C1_03760C_A	STR2	STR2	NA	-1.00912	2.48342e-13	Protein of unknown function
orf19.1944	C5_01250W_A	GPR1	GPR1	NA	1.15272	2.58758e-13	Plasma membrane G-protein-coupled receptor of the cAMP-PKA pathway; required for WT hyphal growth; reports differ on role in cAMP-mediated glucose signaling; Gpr1 C terminus binds Gpa2; regulates HWP1 and ECE1; flow model biofilm induced
orf19.6117	CR_07480W_A		NA	NA	1.47147	2.63818e-13	S. pombe ortholog SPAC5D6.04 is a predicted auxin family transmembrane transporter; ketoconazole and hypoxia induced
orf19.711	CR_06550C_A		NA	NA	2.42255	2.64129e-13	Protein of unknown function; induced by nitric oxide; predicted ORF from Assembly 19; removed from Assembly 20; restored based on transcription data
orf19.2680	C4_03110W_A		DNF3	NA	1.22753	3.39824e-13	Protein of unknown function
orf19.2925	C1_02380C_A		CIN4	NA	1.45147	3.5092e-13	Protein of unknown function
orf19.1766	C2_10150W_A		NA	NA	1.32248	3.58802e-13	Secreted protein; fluconazole-induced
orf19.4215	C6_00440C_A	FET34	NA	NA	-2.29678	3.68829e-13	Multicopper ferroxidase; induced by low iron, ciclopirox olamine, ketoconazole, hypoxia; alkaline induced by Rim101; repressed in fluconazole-resistant isolate; Sfu1, Hog1 repressed; complements S. cerevisiae fet3; Spider biofilm induced
orf19.4496	C2_04540C_A	GDT1	GDT1	NA	0.957977	4.1305e-13	Protein of unknown function
orf19.2286	C2_07290W_A		LIA1	NA	-1.09589	5.83138e-13	Putative deoxyhypusine hydroxylase; ketoconazole-induced; protein level decreases in stationary phase cultures; required for biofilm formation; Spider biofilm repressed
orf19.1442	C2_01380W_A	PLB4.5	NA	PLB3	-3.06766	8.08825e-13	Phospholipase B; Hog1-induced; regulated by Ssn6; putative GPI-anchor; repressed during cell wall regeneration; clade-associated gene expression; Hap43-induced; rat catheter and Spider biofilm repressed
orf19.2552	CR_01630C_A		NA	NA	1.5196	9.7459e-13	Protein similar to S. cerevisiae Pmr1p; amphotericin B induced; previously merged with orf19.2553; unmerged from orf19.2553 in a revision of Assembly 21
orf19.669	C1_11340W_A	PRM1	PRM1	NA	1.62645	9.94371e-13	Putative membrane protein with a predicted role in membrane fusion during mating; Hap43p-repressed gene; protein induced during the mating process
orf19.3300	C1_01110C_A	ZPR1	ZPR1	NA	-1.1796	1.26499e-12	Protein with putative zinc finger; regulated by Gcn4p; repressed in response to amino acid starvation (3-aminotriazole treatment); upregulation correlates with clinical development of fluconazole resistance
orf19.1369	C2_09810C_A		NA	NA	1.17214	1.49738e-12	Protein with predicted peptidase domains; Hap43-repressed gene
orf19.5634	C4_00110C_A	FRP1	NA	NA	-2.49237	1.50639e-12	Ferric reductase; alkaline-induced by Rim101; iron-chelation-induced by CCAAT-binding factor; fluconazole-repressed; ciclopirox-, hypoxia-, Hap43-induced; colony morphology-related regulation by Ssn6; Spider and flow model biofilm induced
orf19.1956	C5_01140C_A		MSC6	NA	1.06597	1.65496e-12	Protein of unknown function
orf19.3694	C1_02370C_A		NA	NA	1.19761	1.82048e-12	Protein of unknown function
orf19.5015	C1_13780W_A	MYO2	MYO2	NA	0.749594	2.44007e-12	Class V myosin; nonessential; sole class V myosin in C. albicans; required for WT actin cytoskeletal polarity, nuclear organization, migration, hyphal growth; conserved myosin ATPase/tail domains; Hap43-induced; flow model biofilm repressed
orf19.675	C1_11270W_A		NA	NA	1.35586	2.45775e-12	Cell wall protein; induced in core stress response and core caspofungin response; iron-regulated; amphotericin B, ketoconazole, and hypoxia induced; regulated by Cyr1, Ssn6; induced in oralpharyngeal candidasis; Spider biofilm repressed
orf19.3243	CR_01110W_A	SRP54	SRP54	NA	-0.688156	2.80437e-12	Putative signal recognition particle (SRP) subunit; induced in ssr1 null; Spider biofilm repressed
orf19.3212	C5_03990W_A	MID1	MID1	NA	0.869843	2.88972e-12	Putative stretch-activated Ca2+ channel of the high affinity calcium uptake system; role in thigmotropism; decreased transcription is observed upon fluphenazine treatment or in an azole-resistant strain with CDR1 and CDR2 overexpression
orf19.1914	C2_00080C_A	FAV3	NA	NA	1.3484	3.8937e-12	Putative alpha-1,6-mannanase; induced by mating factor in MTLa/MTLa opaque cells
orf19.557	CR_05210W_A		NA	NA	-1.12852	4.52056e-12	Protein of unknown function; Hap43-repressed; Spider biofilm repressed
orf19.6208	C1_07000W_A	MEF2	MEF2	NA	1.22548	4.63469e-12	Putative mitochondrial translation elongation factor; caspofungin induced
orf19.1307	C4_03710C_A		NA	YML018C	2.71403	4.65099e-12	Predicted membrane protein; rat catheter biofilm induced
orf19.1291	C4_05290W_A	ABZ1	ABZ1	NA	0.993811	4.715e-12	Protein of unknown function
orf19.2356	CR_07060C_A	CRZ2	NA	NA	-1.48524	4.92013e-12	C2H2 transcription factor; crz1 not crz2 null mutation suppresses fluconazole resistance of homozygous cka2 null; Rim101-repressed at pH 8; required for yeast cell adherence to silicone substrate; Spider biofilm induced
orf19.3678	C1_02210W_A		NA	NA	-1.67074	5.19881e-12	Protein of unknown function
orf19.188	C2_04780W_A		NA	NA	1.16731	5.46218e-12	Protein of unknown function
orf19.5662	C4_00350W_A	PEP7	PEP7	NA	0.785987	6.49372e-12	Vesicle transport protein; acts in endosomal transport; roles in metal ion resistance, virulence, adhesion, hyphal growth, chlamydospore formation; similar to S. cerevisiae Pep7p
orf19.3919.1	C5_04330W_A		NA	NA	0.938452	6.66216e-12	Putative adhesin-like protein
orf19.7109	C7_00140C_A		YGL242C	NA	1.02141	6.84411e-12	Protein of unknown function
orf19.1133	C1_03710C_A	MSB1	MSB1	NA	1.00416	7.25707e-12	Putative regulator of transcription; expression in S. cerevisiae flo8 and flo11 mutants suggests a role in regulation of adhesion factors
orf19.5425	C3_00420W_A		NA	NA	0.914369	8.71937e-12	Protein of unknown function
orf19.4991	C1_13570W_A	MPT5	MPT5	NA	1.14497	9.7464e-12	Putative RNA-binding protein; Hap43p-repressed gene; protein induced during the mating process
orf19.5741	C6_03700W_A	ALS1	NA	NA	1.35141	1.15182e-11	Cell-surface adhesin; adhesion, virulence, immunoprotective roles; band at hyphal base; Rfg1, Ssk1, Spider biofilm induced; flow model biofilm repressed; CAI-4 strain background effects; promoter bound Bcr1, Tec1, Efg1, Ndt80, and Brg1
orf19.4608	C4_01850C_A	PDC12	NA	NA	1.48937	1.4364e-11	Putative pyruvate decarboxylase; fungal-specific (no human or murine homolog)
orf19.6968	C3_05320W_A		YDL073W	NA	-1.25314	1.83861e-11	Protein of unknown function; Hog1-repressed; Spider biofilm induced
orf19.5079	C1_08070W_A	CDR4	NA	NA	-1.10855	1.83861e-11	Putative ABC transporter superfamily; fluconazole, Sfu1, Hog1, core stress response induced; caspofungin repressed; fluconazole resistance not affected by mutation or correlated with expression; rat catheter and flow model biofilm induced
orf19.2507	C3_01030W_A	ARP9	ARP9	NA	-0.58879	2.05497e-11	Protein similar to S. cerevisiae Arp3p, a component of the Arp2/3 complex involved in actin-dependent processes; likely to be essential for growth, based on an insertional mutagenesis strategy
orf19.2444	C1_06010W_A	CHS7	CHS7	NA	0.854137	2.10224e-11	Protein required for wild-type chitin synthase III activity; similar to (but not functional homolog of) S. cerevisiae Chs7p, which effects ER export of Chs3p; induced cyr1 mutant hyphae and ras1 yeast-form cells; Spider biofilm induced
orf19.551	CR_04600W_A		NA	NA	-1.11066	2.23247e-11	Protein of unknown function
orf19.3431	C6_01550C_A		MIP1	NA	1.03077	2.29097e-11	Protein of unknown function
orf19.6781	C3_07200C_A	ZFU2	NA	LYS14	1.07218	2.35363e-11	Zn(II)2Cys6 transcription factor; regulator of yeast form adherence; mutants display increased colonization of mouse kidneys; required for yeast cell adherence to silicone substrate; Spider biofilm induced
orf19.1813	CR_07100W_A	FLC2	FLC2	NA	0.8679	3.07913e-11	Protein involved in heme uptake; putative FAD transporter, similar to S. cerevisiae Flc2p
orf19.4707	C4_00850C_A		NA	NA	2.21748	3.27211e-11	Putative secreted acid sphingomyelin phosphodiesterase; possible Kex2p substrate
orf19.794	C2_04260W_A	SSN3	SSN3	NA	-0.717367	3.39634e-11	Putative cyclin-dependent protein kinase; mutants are sensitive to growth on H2O2 medium
orf19.3591	C2_08800C_A	APE3	APE3	NA	-0.683378	4.98217e-11	Putative vacuolar aminopeptidase Y,; regulated by Gcn2 and Gcn4; rat catheter and Spider biofilm repressed
orf19.2032	C2_00920W_A		NA	NA	0.880937	5.00439e-11	Protein of unknown function; rat catheter biofilm induced
orf19.828	C2_03950W_A		MRPL24	NA	1.31264	5.81127e-11	Putative ribosomal protein, large subunit, mitochondrial precursor; repressed by prostaglandins; Spider biofilm repressed
orf19.6908	C7_01280C_A		FOL3	NA	0.953184	6.02087e-11	Dihydrofolate synthetase involved in folic acid biosynthesis
orf19.2520	CR_01370C_A		MRPS28	NA	1.15041	6.21873e-11	Protein of unknown function
orf19.5751	C6_03770C_A	ORM1	ORM1	NA	-0.986924	6.34632e-11	Putative endoplasmic reticulum membrane protein; Hap43p-repressed gene; mutation confers hypersensitivity to aureobasidin A
orf19.6565	C7_01600W_A		OXA1	NA	1.42534	6.5184e-11	Conserved mitochondrial inner membrane insertase; mediates insertion of mitochondrial- and nuclear-encoded proteins from the matrix into the inner membrane; Spider biofilm repressed
orf19.1235	C4_05540W_A	HOM3	HOM3	NA	1.27393	6.52251e-11	Putative L-aspartate 4-P-transferase; fungal-specific (no human or murine homolog); regulated by Gcn2 and Gcn4; early-stage flow model biofilm induced
orf19.6691	C7_03590C_A		NA	NA	-0.729688	6.60289e-11	Putative ember of the multi-drug and toxin extrusion (MATE) family of the multidrug/oligosaccharidyl-lipid/polysaccharide exporter superfamily; Spider biofilm induced
orf19.5669	C4_00410W_A		NA	NA	0.653427	6.60289e-11	Protein with B-cell receptor-associated protein 31-like domain; membrane-localized protein
orf19.2927	C1_02400C_A	MNN11	MNN11	NA	1.37022	7.41348e-11	Protein of unknown function
orf19.5862	C3_04200W_A	AFP99	NA	NA	1.95217	8.42466e-11	Protein related to arginases; downregulated upon adherence to polystyrene; regulated by Gcn2p and Gcn4p
orf19.3679	C1_02220C_A		YNL200C	NA	-0.907605	8.95644e-11	Putative protein of unknown function; stationary phase enriched protein
orf19.5483	C2_06200C_A		GUF1	NA	0.769799	9.15265e-11	Protein of unknown function
orf19.1800	C4_05440C_A		TDA6	NA	-1.04621	9.33475e-11	Protein of unknown function; Spider biofilm induced
orf19.5543	C6_02720C_A		NA	NA	0.939959	1.00956e-10	Protein of unknown function
orf19.2501	C3_00980W_A	FLC1	NA	NA	0.756109	1.03122e-10	Protein involved in heme uptake; putative FAD transporter, similar to S. cerevisiae Flc1; regulated by iron; macrophage-induced; mutant defective in filamentous growth; Spider biofilm induced
orf19.4670	C4_01190W_A	CAS5	MOT3	NA	0.994706	1.14535e-10	Transcription factor; cell wall damage response; required for adherence, response/resistance to caspofungin; repressed in core stress response; mutants have reduced CFU in mice, hyphal defect in C. elegans infection; Spider biofilm induced
orf19.2030	C2_00940W_A		NA	NA	1.63888	1.20137e-10	Plasma membrane-associated protein; induced in cyr1 or ras1 mutant; induced by hypoxia, ketoconazole and during growth in the mouse cecum; induced in oralpharyngeal candidasis; Spider biofilm induced
orf19.7194	C7_03880C_A		NA	NA	1.30292	1.23131e-10	Protein required for virulence in reconstituted human epithelium (RHE) model of ex vivo infection; decreased transcription is observed upon fluphenazine treatment; induced upon adherence to polystyrene
orf19.3601	C2_08740W_A		NA	NA	-0.706932	1.30835e-10	Protein of unknown function
orf19.6457	C7_02530C_A		YBL086C	NA	-0.935729	1.47294e-10	Protein of unknown function
orf19.4365	CR_03660C_A		NA	NA	1.59429	1.58468e-10	Protein of unknown function
orf19.3370	C4_03440C_A	DOT4	UBP10	NA	1.31589	1.65145e-10	Protein similar to ubiquitin C-terminal hydrolase; localizes to cell surface of hyphal cells, but not yeast-form cells; repressed upon high-level peroxide; Hap43p-induced; rat catheter biofilm induced
orf19.6008	C3_05290C_A		YLL032C	NA	-1.08729	1.71647e-10	S. cerevisiae ortholog YLL032C interacts with ribosomes; repressed by alpha pheromone in SpiderM medium
orf19.3432	C6_01520W_A		NA	NA	1.26268	1.91531e-10	Predicted membrane transporter, member of the drug:proton antiporter (12 spanner) (DHA1) family, major facilitator superfamily (MFS); induced by nitric oxide
orf19.7186	C7_03940C_A	CLB4	CLB4	NA	1.06941	2.01586e-10	B-type mitotic cyclin; nonessential; negative regulator of pseudohyphal growth; dispensible for mitotic exit, cytokinesis; Fkh2-represed; flow model biofilm repressed; farnesol-upregulated in biofilm; reduced total RNA in clb4 mutant
orf19.2028	C2_00960C_A	MXR1	MXR1	NA	1.03275	2.21266e-10	Putative methionine sulfoxide reductase; Plc1-regulated; induced by human neutrophils, flucytosine; macrophage regulated (gene induced, protein decreased); possibly adherence-induced; Spider biofilm induced
orf19.5495	C2_06320W_A		NA	NA	0.797573	2.38777e-10	Putative RNA-binding protein; induced by alpha pheromone in SpiderM medium
orf19.2173	C2_08120W_A	MAF1	NA	NA	-0.984489	2.41808e-10	Putative negative regulator of RNA polymerase III; decreased expression in hyphae vs yeast cells; caspofungin repressed; Spider biofilm repressed
orf19.5879	C3_04350C_A		NA	NA	1.56625	2.45167e-10	Protein of unknown function
orf19.1515	C2_02010C_A	CHT4	CTS2	NA	0.905046	2.58753e-10	Chitinase; similar to S. cerevisiae sporulation-specific Cts2p; functionally complements A. gossypii cts2 mutant sporulation defect; homozygous null mutation causes no obvious defects; transcription decreases upon yeast-to-hyphal switch
orf19.6973	C3_05360C_A		NA	PIM1	-1.05369	2.60377e-10	ATP-dependent LON protease family member; Hap43-repressed gene; regulated by Gcn2 and Gcn4; Spider biofilm induced
orf19.2685	C4_03070W_A	PGA54	NA	NA	1.19735	2.71155e-10	GPI-anchored protein; Hog1-repressed; induced in cyr1 or efg1 mutant or in hyphae; colony morphology-related gene regulation by Ssn6; induced in RHE model; mRNA binds She3; regulated in Spider biofilms by Tec1, Egf1, Ntd80, Rob1, Brg1
orf19.4929	C1_13010W_A		NA	NA	0.851408	3.11111e-10	Protein of unknown function
orf19.2887	C4_06470W_A		YMR295C	NA	0.864626	3.11111e-10	Ortholog in S. cerevisiae is localizedto the bud, mating projection tip, and associates with ribosomes; Spider biofilm induced
orf19.7434	C3_06450W_A	GLG2	NA	NA	1.92467	3.22743e-10	Putative self-glucosylating initiator of glycogen synthesis; expression regulated upon white-opaque switch; hypha-induced; Spider biofilm induced
orf19.1277	C4_05900C_A		NA	NA	1.62206	3.42375e-10	Protein of unknown function; Rgt1, Hap43-repressed; flow model biofilm induced; Spider biofilm induced
orf19.5749	C6_03750C_A	SBA1	NA	NA	-0.823013	3.86111e-10	Similar to co-chaperones; induced in high iron; farnesol-, heavy metal (cadmium) stress-induced; protein level decreases in stationary phase cultures; Hap43-repressed
orf19.5295	C4_04140W_A		NA	NA	1.58568	4.30029e-10	Protein with a predicted endonuclease/exonuclease/phosphatase family domain and a carbon catabolite repressor protein 4 domain; induced by alpha pheromone in SpiderM medium
orf19.5636	C4_00130W_A	RBT5	NA	NA	-4.80515	4.45035e-10	GPI-linked cell wall protein; hemoglobin utilization; Rfg1, Rim101, Tbf1, Fe regulated; Sfu1, Hog1, Tup1, serum, alkaline pH, antifungal drugs, geldamycin repressed; Hap43 induced; required for RPMI biofilms; Spider biofilm induced
orf19.1415	C4_04320W_A	FRE10	NA	FRE2	-1.7135	4.82917e-10	Major cell-surface ferric reductase under low-iron conditions; 7 transmembrane regions and a secretion signal predicted; Tup1, Rim101, Ssn6, Hog1, caspofungin repressed; ciclopirox olamine induced; rat catheter biofilm induced
orf19.4816	C1_09520C_A		YMR209C	NA	-1.01982	4.82917e-10	Protein of unknown function; induced by nitric oxide
orf19.5635	C4_00120W_A	PGA7	NA	NA	-2.31029	4.94303e-10	GPI-linked hyphal surface antigen; induced by ciclopirox olamine, ketoconazole, Rim101 at pH 8; Hap43, fluconazole; flow model biofilm induced; Spider biofilm induced; required for RPMI biofilm; Bcr1-induced in a/a biofilm
orf19.74	C6_04170C_A	SEC5	SEC5	NA	-0.778981	5.4245e-10	Predicted exocyst component; ortholog of S. cerevisiae Sec5p; merged with orf19.75 in Assembly 21
orf19.5292	C4_04170C_A	AXL2	AXL2	NA	1.14858	5.4245e-10	Ortholog of S. cerevisiae Axl2; a plasma membrane protein involved in determination of budding pattern; O-glycosylated by Pmt4; mutant is viable
orf19.261	C3_02690C_A		SEC59	NA	-0.714811	5.4418e-10	Protein of unknown function
orf19.5576	C6_02980C_A		CAB1	NA	-0.796447	5.65798e-10	Putative pantothenate kinase; ortholog of S. cerevisiae Cab1; transposon mutation affects filamentous growth; repressed in core stress response
orf19.473	CR_03920C_A	TPO4	NA	NA	1.05064	6.13083e-10	Putative sperimidine transporter; fungal-specific (no human or murine homolog); Spider biofilm induced; promoter bound by Tec1 and Ndt80; Bcr1-repressed in RPMI a/a biofilms
orf19.3668	C1_02110C_A	HGT2	NA	NA	-2.51373	6.29944e-10	Putative MFS glucose transporter; 20 member C. albicans glucose transporter family; 12 probable membrane-spanning segments; expressed in rich medium with 2% glucose; rat catheter and Spider biofilm induced
orf19.7342	CR_09470W_A	AXL1	AXL1	NA	0.83007	6.31043e-10	Putative endoprotease; induced by alpha factor; transcript is upregulated in an RHE model of oral candidiasis and in clinical isolates from HIV+ patients with oral candidiasis
orf19.4476	C1_04010C_A		NA	YPL088W	1.35119	7.37568e-10	Protein with a NADP-dependent oxidoreductase domain; transcript induced by ketoconazole; rat catheter and Spider biofilm induced
orf19.1727	C3_01250W_A	PMC1	PMC1	NA	1.19158	8.03081e-10	Vacuolar calcium P-type ATPase; transcript regulated by calcineurin and fluconazole; mutant shows increased resistance to fluconazole, lithium; increased sensitivity to calcium; Spider biofilm induced
orf19.4688	C4_01010C_A	DAG7	NA	NA	1.62207	8.13186e-10	Secretory protein; a-specific, alpha-factor induced; mutation confers hypersensitivity to toxic ergosterol analog; fluconazole-induced; induced during chlamydospore formation in C. albicans and C. dubliniensis
orf19.4330	C5_03030W_A		NA	NA	1.19677	8.20063e-10	Protein of unknown function
orf19.4833	C1_09690W_A	MLS1	MLS1	NA	-1.6272	8.29436e-10	Malate synthase; glyoxylate cycle enzyme; no mammalian homolog; regulated upon white-opaque switch; phagocytosis, strong oxidative stress induced; stationary phase enriched; flow model biofilm repressed; rat catheter, Spider biofilm induced
orf19.5059	C1_07880C_A	GCS1	NA	NA	-0.85841	9.17134e-10	Gamma-glutamylcysteine synthetase; glutathione synthesis, required for virulence;induced in low iron, H2O2, Cd, or presence of human neutrophils; possibly adherence-induced; Spider and F-12/CO2 biofilm induced
orf19.5343	C2_10660W_A	ASH1	ASH1	NA	-1.43083	9.261e-10	GATA-like transcription factor; localizes to daughter cell, hyphal tip cell nuclei; mRNA localization mediated by She3; required for WT virulence and filamentous growth on solid media; Ras1 repressed in yeast, Cyr1 repressed yeast, hyphae
orf19.1830	C1_10580C_A		NA	NA	1.0326	9.89435e-10	Protein of unknown function; Hap43-induced; rat catheter and Spider biofilm induced
orf19.3066	C1_03680W_A	ENG1	DSE4	NA	-1.2513	1.08577e-09	Endo-1,3-beta-glucanase; ortholog of S. cerevisiae Dse4 needed for cell separation; caspofungin, fluconazole repressed; repressed by alpha pheromone in SpiderM medium; flow model biofilm induced; rat catheter biofilm repressed
orf19.775	C1_04700C_A		NA	NA	-0.738431	1.18713e-09	Protein of unknown function
orf19.6741	C3_07470W_A		PUN1	NA	-1.2546	1.21674e-09	Putative plasma membrane protein; predicted role in cell wall integrity; regulated by Nrg1, Tup1; induced during chlamydospore formation in both C. albicans and C. dubliniensis
orf19.4270	C5_02570W_A	MNN13	NA	NA	1.07539	1.25084e-09	Predicted alpha-1,3-mannosyltransferase activity with a role in protein glycosylation; regulated by Sef1p-, Sfu1p-, and Hap43p
orf19.5698	C5_00030W_A		MRPL1	NA	0.95683	1.26125e-09	Putative mitochondrial ribosomal protein of the large subunit; transcript is upregulated in clinical isolates from HIV+ patients with oral candidiasis; Spider biofilm repressed
orf19.5230	C1_12340C_A	MRPS9	MRPS9	NA	0.927351	1.27269e-09	Mitochondrial ribosomal protein S9; has N-terminal mitochondrial targeting signal and an S9 consensus motif; overexpression in S. cerevisiae causes respiratory defect that is reversible upon cessation of C. albicans gene expression
orf19.4913	C1_12830C_A		DUF1	NA	-0.866277	1.76221e-09	Protein of unknown function
orf19.4151	C5_01570C_A	SPO1	SPO1	NA	1.29816	1.76221e-09	Protein similar to phospholipase B; fungal-specific (no human or murine homolog)
orf19.5353	C2_10730W_A		NA	NA	1.71014	2.06061e-09	Protein of unknown function
orf19.6920	C7_01390W_A		NA	NA	1.45502	2.18651e-09	Protein of unknown function; induced during chlamydospore formation in both C. albicans and C. dubliniensis; Hap43-induced gene; Spider biofilm induced; F-12/CO2 early biofilm induced
orf19.6365	CR_08070W_A	PTP1	PTP1	NA	-0.778298	2.27835e-09	Phosphotyrosine-specific protein phosphatase; rat catheter biofilm induced
orf19.4239	C5_02310C_A		NA	NA	1.05782	2.27835e-09	Planktonic growth-induced gene
orf19.2133	C6_04490W_A	LIP4	NA	NA	0.803044	2.36909e-09	Secreted lipase, member of a differentially expressed lipase gene family with possible roles in nutrition and/or in creating an acidic microenvironment; expressed more strongly during mucosal infections than during systemic infections
orf19.2754	C4_02480C_A	TIM13	TIM13	NA	1.69057	2.69737e-09	Predicted mitochondrial intermembrane space protein with a role in protein import into mitochondria
orf19.7298	CR_09020C_A	CHS2	NA	NA	1.04982	2.71406e-09	Chitin synthase; nonessential; required for wild-type chitin deposition in hyphae; transcript regulated during dimorphic transition; Chs1 and Chs2, but not Chs3, are inhibited by the protoberberine HWY-289; flow model biofilm repressed
orf19.3803	C4_04770C_A	MNN22	NA	NA	0.516005	2.88335e-09	Alpha-1,2-mannosyltransferase; required for normal cell wall mannan; regulated by Tsa1, Tsa1B at 37 deg; repressed in core stress response; NO, Hog1 induced; confers sensitivity to cell wall perturbing agents; Spider biofilm repressed
orf19.748	C4_05180C_A		NUP145	NA	-0.659929	3.14033e-09	Protein of unknown function
orf19.943	C5_00460C_A	FET33	GMC1	NA	0.786762	3.22426e-09	Putative multicopper ferro-O2-oxidoreductase; repressed in core caspofungin response; fails to complement S. cerevisiae fet3 iron-related phenotypes; rat catheter and Spider biofilm induced
orf19.147	C2_04660C_A	YAK1	YAK1	NA	-1.05217	3.7729e-09	Predicted serine-threonine protein kinase; involved in hyphal growth regulation and biofilm formation; flow model biofilm induced; induced in core caspofungin response
orf19.1950	C5_01200W_A		POA1	NA	1.16448	4.12333e-09	Protein of unknown function
orf19.341	C3_03440C_A		NA	NA	1.50383	4.15264e-09	Putative spermidine export pump; fungal-specific (no human or murine homolog)
orf19.3616	C2_08610W_A	ERG9	ERG9	NA	-0.993669	4.21344e-09	Putative farnesyl-diphosphate farnesyl transferase (squalene synthase); sterol biosynthesis pathway; likely essential for growth; regulated by fluconazole, lovastatin; amphotericin B, caspofungin repressed; Spider biofilm repressed
orf19.4362	CR_03640C_A		MSP1	NA	-0.653694	4.21344e-09	Protein of unknown function
orf19.5381	C3_00730W_A		PUF4	NA	1.15374	4.45319e-09	Protein of unknown function
orf19.6068	C1_00400W_A	SVF1	SVF1	NA	-1.17789	4.87766e-09	Putative survival factor; stationary phase enriched protein; fluconazole-induced; regulated by Gcn4p; repressed in response to amino acid starvation (3-AT treatment); fungal-specific (no human or murine homolog)
orf19.1964	C5_01070C_A		NA	NA	-1.72658	5.04579e-09	Protein of unknown function; repressed by fluphenazine treatment; induced by benomyl treatment and in an RHE model; regulated by Nrg1, Tup1
orf19.3148	C2_06740W_A		NA	NA	0.830139	5.20115e-09	Protein of unknown function; possibly an essential gene, disruptants not obtained by UAU1 method
orf19.2192	C2_07900W_A	GDH2	GDH2	NA	-1.12825	5.82486e-09	Putative NAD-specific glutamate dehydrogenase; fungal-specific; transcript regulated by Nrg1, Mig1, Tup1, and Gcn4; stationary phase enriched protein; flow model biofilm induced; Spider biofilm induced
orf19.4894	C1_10240C_A		YER010C	NA	1.53295	6.99031e-09	Protein with similarity to S. cerevisiae Yer010cp, a protein of unknown function belonging to the prokaryotic RraA family; repressed by benomyl; Hap43-induced; Spider biofilm induced
orf19.7425	C3_06400C_A		UNG1	NA	1.00706	7.13752e-09	Protein of unknown function
orf19.6985	C3_05470W_A	TEA1	TEA1	NA	-0.716067	7.18837e-09	Putative transcription factor with zinc cluster DNA-binding motif; has similarity to S. cerevisiae Tea1p; Hap43p-repressed gene
orf19.3936	C5_04510W_A	GDE1	GDE1	NA	1.02197	7.51306e-09	Glycerophosphocholine phosphodiesterase; mutation confers hypersensitivity to 5-fluorouracil (5-FU); F-12/CO2 early biofilm induced
orf19.7218	C1_14120C_A	RBE1	PRY2	NA	-1.4566	7.96364e-09	Pry family cell wall protein; Rim101, Efg1, Ssn6, alkaline repressed; O-glycosylation; no GPI anchor predicted; ketoconazol induced; regulated by Sef1, Sfu1, Hap4; flow model biofilm induced; rat catheter and Spider biofilm repressed
orf19.5867	C3_04250W_A	WSC1	NA	NA	0.797934	8.44533e-09	Putative cell wall component; transcript upregulated in cyr1 mutant (yeast or hyphae); Spider and flow model biofilm induced
orf19.1265	C4_05790W_A		TRS130	NA	0.708019	8.53327e-09	Protein of unknown function
orf19.3499	C6_02100W_A		NA	NA	2.03952	9.35832e-09	Secreted potein; Hap43-repressed; fluconazole-induced; regulated by Tsa1, Tsa1B under H2O2 stress conditions; induced by Mnl1p under weak acid stress; Spider biofilm induced
orf19.35	C2_06600W_A		NA	NA	-0.931775	9.4031e-09	Predicted kinase; rat catheter, flow model, Spider biofilm induced
orf19.6245	C1_06660W_A		NA	NA	-1.1299	9.98263e-09	Protein of unknown function; regulated by osmotic stress via Hog1 and oxidative stress (Hog1- and Cap1-independent); induced by alpha pheromone in SpiderM medium; Spider biofilm induced
orf19.5953	C3_04860W_A	SFP1	SFP1	NA	-1.03011	1.01663e-08	C2H2 transcription factor; predicted regulator of ribosomal protein and biogenesis genes; possibly essential, disruptants not obtained by UAU1 method; rat catheter biofilm induced
orf19.5705	C6_03450C_A	NAM2	NAM2	NA	0.996915	1.13392e-08	Mitochondrial leucyl-tRNA synthetase
orf19.4555	C6_04130C_A	ALS4	NA	SAG1	-1.26767	1.16282e-08	GPI-anchored adhesin; role in adhesion, germ tube induction; growth, temperature regulated; expressed during infection of human buccal epithelial cells; repressed by vaginal contact; biofilm induced; repressed during chlamydospore formation
orf19.7547	CR_09750C_A		PIB1	NA	-0.835615	1.16282e-08	Protein of unknown function
orf19.2452	C1_05950C_A		NA	NA	-1.77749	1.24276e-08	Protein of unknown function; induced in high iron; repressed in core caspofungin response; ketoconazole-repressed; colony morphology-related gene regulation by Ssn6; possibly subject to Kex2 processing
orf19.4274	C5_02600W_A	PUT1	PUT1	NA	1.29101	1.31715e-08	Putative proline oxidase; alkaline upregulated by Rim101; flow model biofilm induced; Spider biofilm induced
orf19.255	C3_02640C_A	ZCF1	NA	NA	-0.85861	1.33474e-08	Zn(II)2Cys6 transcription factor; transcript regulated during hypha formation; 5'-UTR intron; mutants show decreased colonization of mouse kidneys; flow model biofilm induced; Spider biofilm induced
orf19.2270	C2_07160W_A	SMF12	SMF1	NA	-1.00909	1.35231e-08	Ortholog of S. cerevisiae Smf1; manganese transporter; Gcn4-regulated; Hap43, alkaline induced; caspofungin repressed; mutants are viable
orf19.4590	C4_02030W_A	RFX2	NA	NA	1.23277	1.36014e-08	Transcriptional repressor; regulator of filamentation, response to DNA damage, adhesion, virulence in murine mucosal, systemic infections; RFX domain; regulated by Nrg1, UV-induced; partially complements S. cerevisiae rfx1 mutant defects
orf19.5194.1	C1_04430C_A		NA	NA	0.86138	1.36583e-08	Putative protein of unknown function; clade-associated gene expression
orf19.3341	C1_01530C_A		YDR341C	NA	-0.664546	1.43169e-08	Putative tRNA-Arg synthetase; essential; genes encoding ribosomal subunits, translation factors, and tRNA synthetases are downregulated upon phagocytosis by murine macrophage; downregulated by growth in the mouse cecum
orf19.1822	C1_06280C_A	UME6	NA	UME6	1.79897	1.51544e-08	Zn(II)2Cys6 transcription factor; role in hyphal extension, virulence, adherence to plastic; rat catheter biofilm induced; has a long 5'-UTR that regulates translational efficiency and controls transition to filamentous growth
orf19.7016	C7_00980W_A	PHM5	PPN1	NA	1.06344	1.54287e-08	Protein of unknown function
orf19.6387	CR_08250C_A	HSP104	HSP104	NA	-0.941509	1.54611e-08	Heat-shock protein; roles in biofilm and virulence; complements chaperone, prion activity in S. cerevisiae; guanidine-insensitive; heat shock/stress induced; repressed in farnesol-treated biofilm; sumoylation target; Spider biofilm induced
[truncated: 6,168 more rows]

## Sheet: TRA1vsQ3_ND
Comparison: TRA1 vs tra1Q3 without drug treatment
[truncated: 6,469 more rows]

## Sheet: TRA1vsQ3_CASP
Comparison: TRA1 vs tra1Q3 with caspofungin treatment
[truncated: 6,469 more rows]

## Sheet: Genotype-Condition_Interaction
Comparison: Interaction between genotype and treatment
[truncated: 6,469 more rows]
