# Supplementary material
Source: publisher figshare collection journal article supplement (https://gsajournals.figshare.com/articles/dataset/_/15053076)
Supplement: Supplementary file 4 [file 1]

**Table S1. Fungal Strains, Plasmids, and Gene Fragments**

**Fungal strains**

| Strain | Description                                                                                                                                                                                                                                                                                                                                                                                                    | Genotype                                                        | Phenotype                | Reference                            |
|--------|----------------------------------------------------------------------------------------------------------------------------------------------------------------------------------------------------------------------------------------------------------------------------------------------------------------------------------------------------------------------------------------------------------------|-----------------------------------------------------------------|--------------------------|--------------------------------------|
| CY4353 | <i>Saccharomyces cerevisiae</i> expressing wild-type <i>TRA1</i>                                                                                                                                                                                                                                                                                                                                               | <i>MATα his3Δ0 leu2Δ0 ura3Δ0 TRA1-HIS3 +DED1pr-YHR100-LEU2</i>  | wild-type<br><i>TRA1</i> | Hoke <i>et al. Curr Genet</i> (2010) |
| CY6582 | <i>Saccharomyces cerevisiae tra1Q3</i> mutant strain with 3 point mutations in the gene <i>TRA1</i> (R3389Q, R3390Q, R3456Q)                                                                                                                                                                                                                                                                                   | <i>MATα his3Δ0 leu2Δ0 ura3Δ0 tra1Q3-HIS3+DED1pr-YHR100-LEU2</i> | <i>tra1Q3</i>            | Berg <i>et al. G3</i> 2018           |
| fRS302 | Wild-type <i>Candida albicans</i> strain SC5314 containing empty CRISPR-Cas9 backbone (pRS252), selected for based on NAT resistance background; the control strain for the mutant <i>tra1Q3</i>                                                                                                                                                                                                               | <i>NAT-Cas9</i>                                                 | <i>NATr</i>              |                                      |
| fRS318 | <i>Candida albicans tra1Q3</i> mutant strain with 3 point mutations in the gene <i>TRA1</i> (K3471Q, R3472Q, R3538Q). Plasmid pRS290 (CRISPR-Cas9 plasmid targeting <i>TRA1</i> ) was co-transformed with gene block gRS11 (repair template containing 3 <i>TRA1</i> mutations) into the WT <i>C. albicans</i> strain SC5314. Mutations were verified using Sanger sequencing. One of two mutant strains used. | <i>NAT-Cas9 tra1Q3/tra1Q3 (K3471Q, R3472Q, R3538Q)</i>          | <i>NATr tra1Q3</i>       |                                      |
| fRS319 | <i>Candida albicans tra1Q3</i> mutant strain with 3 point mutations in the gene <i>TRA1</i> (K3471Q, R3472Q, R3538Q). Plasmid pRS290 (CRISPR-Cas9 plasmid targeting <i>TRA1</i> ) was                                                                                                                                                                                                                          | <i>NAT-Cas9 tra1Q3/tra1Q3 (K3471Q, R3472Q, R3538Q)</i>          | <i>NATr tra1Q3</i>       |                                      |

**Table S1. Fungal Strains, Plasmids, and Gene Fragments**

|        |                                                                                                                                                                                                                                                                                                                                         |                           |                  |  |
|--------|-----------------------------------------------------------------------------------------------------------------------------------------------------------------------------------------------------------------------------------------------------------------------------------------------------------------------------------------|---------------------------|------------------|--|
|        | co-transformed with gene block gRS11 (repair template containing 3 <i>TRA1</i> mutations) into the WT <i>C. albicans</i> strain SC5314. Mutations were verified using Sanger sequencing. One of two mutant strains used.                                                                                                                |                           |                  |  |
| fRS572 | <i>Candida albicans tra1</i> mutant strain, with a deletion of the <i>TRA1</i> open reading frame. Plasmid pRS477 (CRISPR-Cas9 plasmid targeting <i>TRA1</i> ) was co-transformed with gene block gRS83 (repair template) into the WT <i>C. albicans</i> strain SC5314. Mutations were verified by PCR. One of two mutant strains used. | NAT-Cas9 <i>tra1/tra1</i> | NATr <i>tra1</i> |  |
| fRS573 | <i>Candida albicans tra1</i> mutant strain, with a deletion of the <i>TRA1</i> open reading frame. Plasmid pRS477 (CRISPR-Cas9 plasmid targeting <i>TRA1</i> ) was co-transformed with gene block gRS83 (repair template) into the WT <i>C. albicans</i> strain SC5314. Mutations were verified by PCR. One of two mutant strains used. | NAT-Cas9 <i>tra1/tra1</i> | NATr <i>tra1</i> |  |

**Plasmids**

| Plasmid | Description | aka | Citation |
|---------|-------------|-----|----------|
|---------|-------------|-----|----------|

**Table S1. Fungal Strains, Plasmids, and Gene Fragments**

|        |                                                                                                                                                                                                                                                                                                                                                                                            |                                            |                                          |
|--------|--------------------------------------------------------------------------------------------------------------------------------------------------------------------------------------------------------------------------------------------------------------------------------------------------------------------------------------------------------------------------------------------|--------------------------------------------|------------------------------------------|
| pRS252 | CRISPR-Cas9 optimized for <i>Candida albicans</i> plasmid backbone; contains homology regions for NEUT5L integration, <i>C. albicans</i> -optimized Cas9, NAT resistance marker, and AMP selection. Linearized with Pacl for integration. Linearized with NgoMIV for Gibson assembly.                                                                                                      | Addgene ID: 89576, pJK-caCas9-NatMX-Neut5L | Shapiro et al. Nature Microbiology, 2018 |
| pRS290 | CRISPR-Cas9 <i>C. albicans</i> plasmid assembled by cloning the plasmid pRS252 and the geneblock fragment gRS10; CRISPR-Cas9 targets <i>TRA1</i> with two sgRNAs flanking the Q3 loci. Contains homology regions for <i>NEUT5L</i> integration, <i>C. albicans</i> -optimized Cas9, NAT resistance marker, and AMP selection. Linearized with Pacl for integration.                        |                                            |                                          |
| pRS477 | CRISPR-Cas9 <i>C. albicans</i> plasmid assembled by cloning the plasmid pRS252 and the geneblock fragment gRS83; CRISPR-Cas9 targets <i>TRA1</i> with two sgRNAs flanking the <i>TRA1</i> open reading frame. Contains homology regions for <i>NEUT5L</i> integration, <i>C. albicans</i> -optimized Cas9, NAT resistance marker, and AMP selection. Linearized with Pacl for integration. |                                            |                                          |

**Gene fragments**

| Gene block | Description                                                                                                                                                                                                 | Sequence                                                                                                                                                                                                                                                                                                                                                                                                                                |
|------------|-------------------------------------------------------------------------------------------------------------------------------------------------------------------------------------------------------------|-----------------------------------------------------------------------------------------------------------------------------------------------------------------------------------------------------------------------------------------------------------------------------------------------------------------------------------------------------------------------------------------------------------------------------------------|
| gRS10      | Gene block to be cloned into pRS252 to target <i>TRA1</i> for cleavage with 2 sgRNAs. Block contains regions of homology to plasmid for Gibson assembly, sgRNA promoter, two sgRNAs (containing sgRNA tail) | GAGATCCAGAAAACCTGAATTGTGCTTGAATACCACTTG<br>TTTAGCCTAAAAGTCATTGGTCAATAACTATACTCGAGT<br>ATTGCCTCATCAAAGAAACAATCAAATATTATAGATACT<br>CACTCCATCACGTGATAATTTCACTGGTATGGAAAAGT<br>GGAAAATTTTATAAAAAAAAAATTTGATGCCTTTGGCATA<br>GCTGAAACTTCGGCCCAATAGGATTGGAGAATATGTTT<br>TCGCAGCGTTCTTACAATTAATTGTGGTGGAAAGTTTCG<br>AGACTTGCGTAAACTATTTTTAATTTGACCACGAGCTAA<br>ATCAATGGGTTTTAGAGCTAGAAATAGCAAGTTAAAATA<br>AGGCTAGTCCGTTATCAACTTGAAAAAGTGGCACCGA |

**Table S1. Fungal Strains, Plasmids, and Gene Fragments**

|       |                                                                                                                                                                                                                                                                                                                                |                                                                                                                                                                                                                                                                                                                                                                                                                                                                                                                                                                                                                                                                                                                                                                                                                                                                                                                                                                                                                                                                                                                                                                                                  |
|-------|--------------------------------------------------------------------------------------------------------------------------------------------------------------------------------------------------------------------------------------------------------------------------------------------------------------------------------|--------------------------------------------------------------------------------------------------------------------------------------------------------------------------------------------------------------------------------------------------------------------------------------------------------------------------------------------------------------------------------------------------------------------------------------------------------------------------------------------------------------------------------------------------------------------------------------------------------------------------------------------------------------------------------------------------------------------------------------------------------------------------------------------------------------------------------------------------------------------------------------------------------------------------------------------------------------------------------------------------------------------------------------------------------------------------------------------------------------------------------------------------------------------------------------------------|
|       |                                                                                                                                                                                                                                                                                                                                | <p>GTCGGTGGTGCGTATCGGGTTTGGGTAATCTTGTTTTA<br/> GAGCTATGCTGAAAAGCATAGCAAGTTAAAATAAGGCA<br/> GTGATTTTTAATCCAGTCCGTACACAACCTTGAAAAAGT<br/> GCGCACCGATTCCGGTGCTTTTTTTTTGGCGAACGTGGC<br/> GAGAAAGGAAGGGAAGAAAGCGAAAGGAGCGGGCG<br/> CTAG</p>                                                                                                                                                                                                                                                                                                                                                                                                                                                                                                                                                                                                                                                                                                                                                                                                                                                                                                                                                           |
| gRS11 | <p>Gene block acts as a repair template to be used with CRISPR plasmid pRS290. Repair template contains homology to <i>TRA1</i> and contains 5 mutations: 3 Q3 mutations (R3471Q, R3472Q, R3538Q), and 2 synonymous mutations in the sgRNA PAM sites to block further CRISPR activity after integration of repair template</p> | <p>CGAAGCTAATATAACCAGATTTGCTGAAACTGTACTTC<br/> CAAAACAGATTAGAGCTGAATTTGAAAAGATTTGGTA<br/> ATTTGAAACCAAACCTTGAAACTTATATTTCTAAATTA<br/> AGAAATTGGAGAGATAGGTTAGAGGACAAATTAGATAG<br/> ACGGTTTTTCGCAAGTCAATTTGGAGAATTTATGTCCTC<br/> ATTTGAGTGAATTTTCATCATCAGAAATTTGAAGAAATTG<br/> AAGTTCCAGGGCAATATTTGTTGAACAAaGATAGCAAC<br/> GCCCATTTTGTAAAATTGAAAGATTCTTTGgACCATT<br/> GATTTAGCTCGTGGTTCTAGTGCCTGTTATcAGcaATTG<br/> AGAATTCGTGGTCATGATGGTAGTTTACACACATTTGC<br/> GGTCCAATTTCCAGCGGCTCGTAATTGTCGTGCTGAG<br/> GAATCGGTATTTCAACTTTTCAGAATATTTAACGACAGC<br/> ATTTGAGAAAAGTTGAGACTCGTCGTGTAATATCCA<br/> ATTTACTTTACCAATTGCCGTTCCATTATCTCCACATATT<br/> CaaATTGTCAATGATGATACTAGAGATGTGACATTACAA<br/> AGAGTTTATGAAGATTTCTGTAAAAAGAATGGTAAGAG<br/> TCGTGATGAACCATTTATTTATACAGTcGAGAAATTAAG<br/> AGCCGCTTTTGAiCAAAGATTACCCAAACCCGATATTG<br/> CTAGTGTTAAAGTTGAAATCTTGAGTGCAATTCAATCAT<br/> TATTGGTTCCCTCCACGGTGTGAAAAACCATTTTATC<br/> AATTTGTATCCAAATTTTGAAGATTTCTGGTTATTCCGT<br/> AAGCAATTCACCTCACAAATATGCGTCATTTATTTTACC<br/> ACATACATGATGTGTATTAATGCTAGACAACCACAGAAA<br/> ATTCATGTTAATAGAGGTTCCAGGAGCTGTTTGGACTTC<br/> TGATATGTTACCATACAGATTATCAACCAGAAATAATGG<br/> TGAAATTACCCATAATAACAATCTCCTATATTTGTT</p> |
| gRS83 | <p>Gene block to be cloned into pRS252 to target the <i>TRA1</i> open reading frame for cleavage with 2 sgRNAs. Block contains regions of homology to plasmid for Gibson assembly, sgRNA promoter, two sgRNAs (containing sgRNA tail)</p>                                                                                      | <p>GAGATCCAGAAAACCTGAATTGTGCTTGAATACCACTTG<br/> TTTAGCCGTATTATGCCTTTGTCAATGTGTGTAGAATTT<br/> GGTTATTACATATCCATGTGTAATATATATGTTGATCAA<br/> AAACGCGATCTTCTCTTTGGTGTAGTGTGTTACACAAA<br/> AAATTCACTAGTCTAGGTCACATGATAATCACGTGAAA<br/> ATCAAAAATTTGTTGAAATTGAATTTCTCAATTTTGAA<br/> ATTTTGTGTTGAAATAAAAGTCATTGGTCAATAACTATACT<br/> CGAGTATTGCCTCATCAAAGAAACAATCAAATATTATAG<br/> ATACTCACTCCATCACGTGATAATTTCACTGGTATGGAA<br/> AAGTGGAAAATTTTATAAAAAAAAAAATTTGATGCCTTTGG<br/> CATAGCTGAAACTTCGGCCCAATAGGATTGGAGAATAT</p>                                                                                                                                                                                                                                                                                                                                                                                                                                                                                                                                                                                                                                                                                 |

**Table S1. Fungal Strains, Plasmids, and Gene Fragments**

|  |  |                                                                                                                                                                                                                                                                                                                                                                                                                                                                                                                                                                                                                                                     |
|--|--|-----------------------------------------------------------------------------------------------------------------------------------------------------------------------------------------------------------------------------------------------------------------------------------------------------------------------------------------------------------------------------------------------------------------------------------------------------------------------------------------------------------------------------------------------------------------------------------------------------------------------------------------------------|
|  |  | GTTTTCGCAGCGTTCTTACAATTAATTGTGGTGAAG<br>TTCGAGACTTGCGTAACTATTTTTAATTTGGTTACGCG<br>ACTTAATGATAGGTTTTAGAGCTAGAAATAGCAAGTTAA<br>AATAAGGCTAGTCCGTTATCAACTTGAAAAAGTGGCAC<br>CGAGTCGGTGGTGCGTAGCTTCAGCTGATACCTTAGT<br>TTTAGAGCTATGCTGAAAAGCATAGCAAGTTAAAATAA<br>GGCAGTGATTTTTAATCCAGTCCGTACACAACCTTGAAA<br>AAGTGCGCACCGATTCCGGTGCTTTTTTTTTATTGTATTG<br>TATTTATATATGTTTATTAAACTATTAGTATTATTGTTGTAT<br>TTATTAAATTTTCCCATTTTATTGTTATCATTGACTCAA<br>ACTGAGTAATACCTATCTAATCTATATCGATAATCATCTA<br>TTGATTCAGAACCGATACGAATCTTCTATTTTCGTTTAA<br>GTACTCTTCTATCAACTTTATTACCAATATATTCTAAAGC<br>CTTTTCACAAATTATGGCGAACGTGGCGAGAAAGGAA<br>GGGAAGAAAGCGAAAGGAGCGGGCGCTAG |
|--|--|-----------------------------------------------------------------------------------------------------------------------------------------------------------------------------------------------------------------------------------------------------------------------------------------------------------------------------------------------------------------------------------------------------------------------------------------------------------------------------------------------------------------------------------------------------------------------------------------------------------------------------------------------------|
