# Supplementary material
Source: publisher figshare collection journal article supplement (https://gsajournals.figshare.com/articles/dataset/_/15053076)

# Figure S1

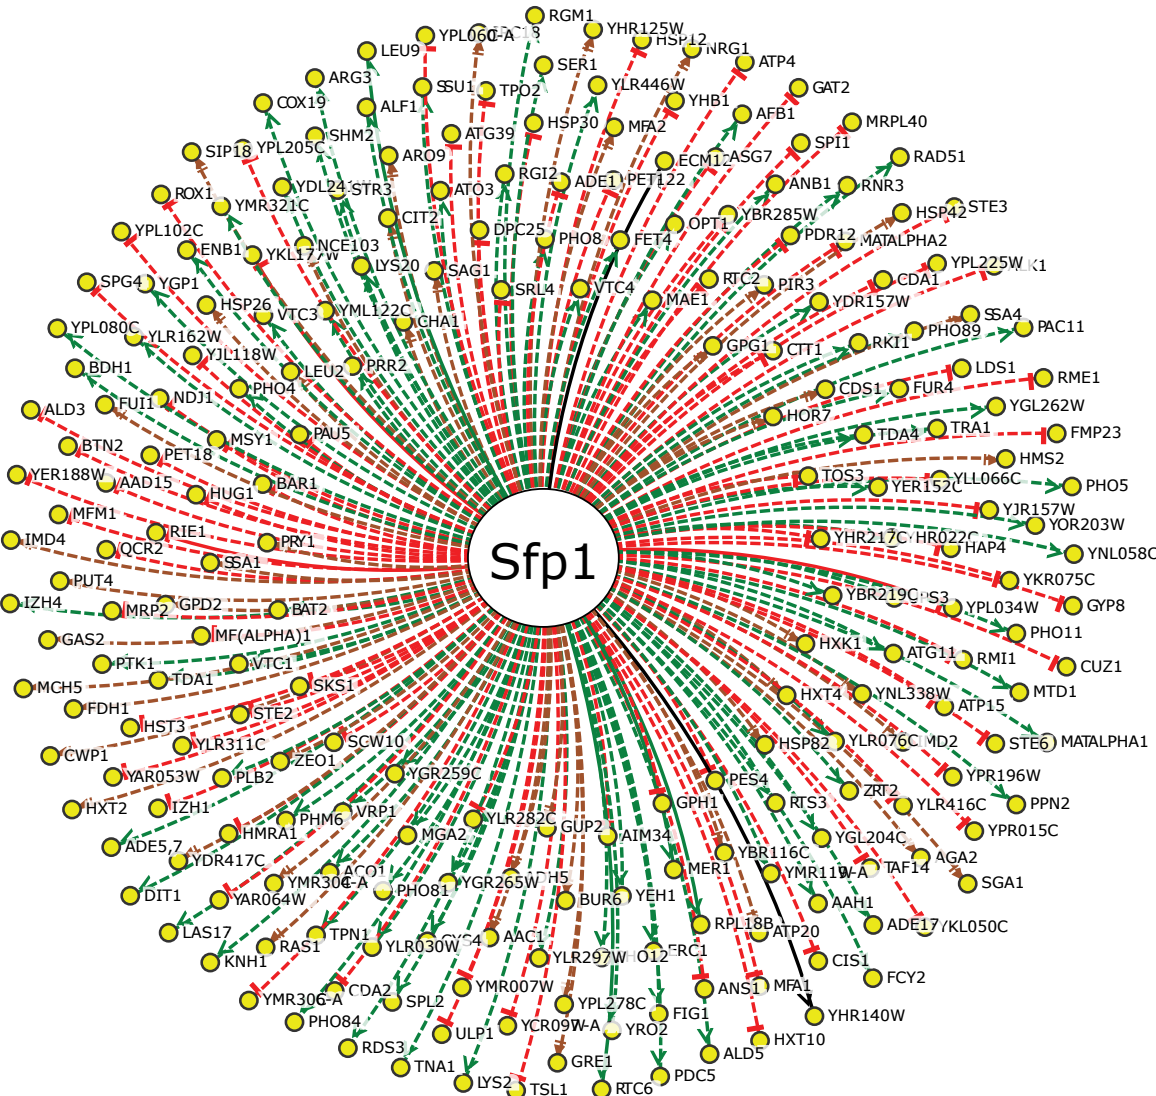

Supplement: Supplementary file 2 [file 1]

# Figure S2

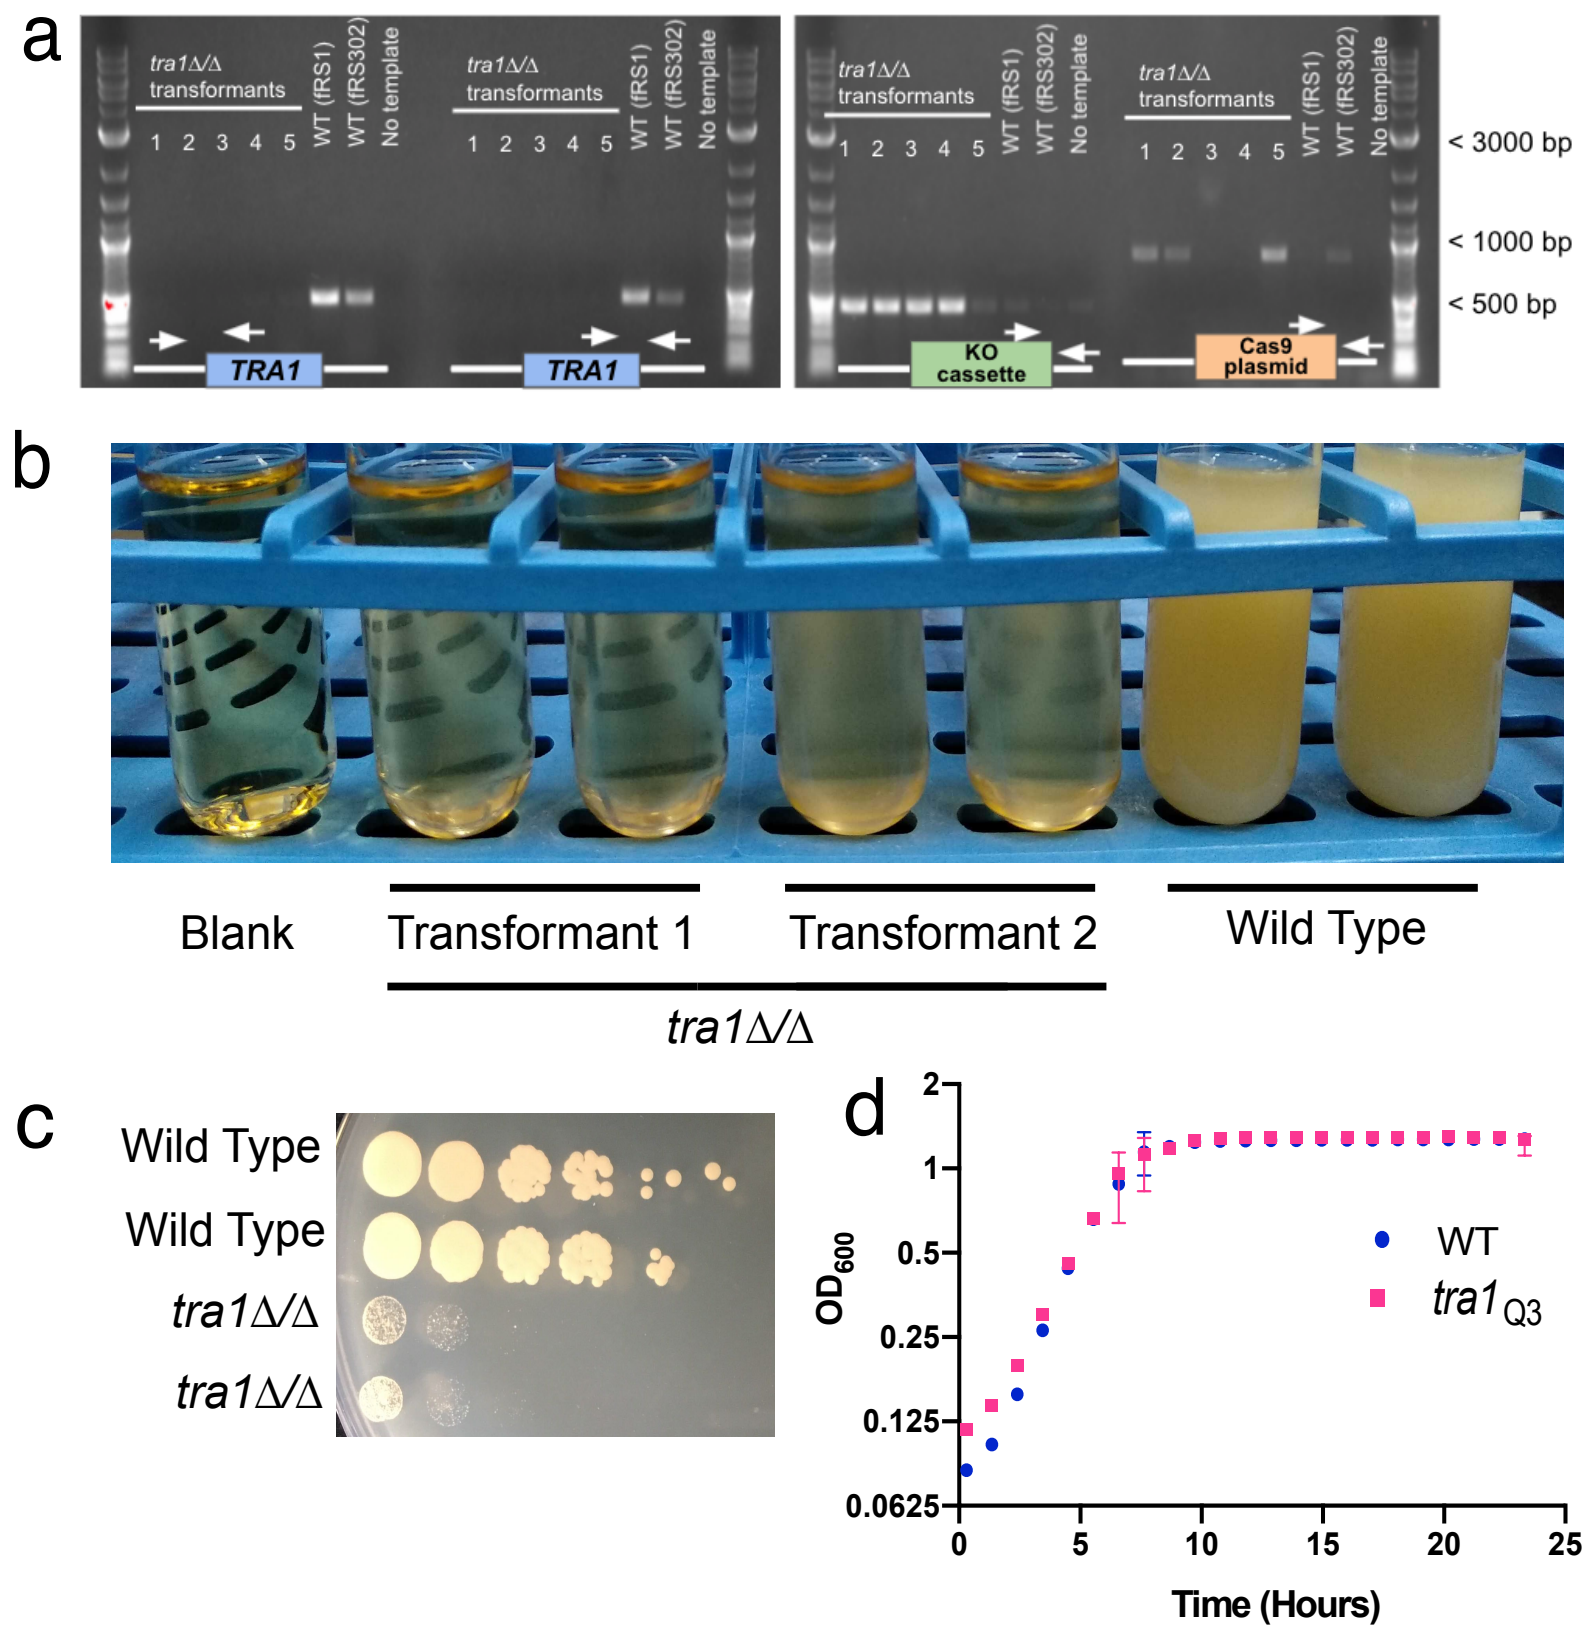

Supplement: Supplementary file 3 [file 1]
